# Supplementary material
Source: publisher site journal article supplement (https://www.dovepress.com/get_supplementary_file.php?f=supplementary_file_47127.pdf)
Supplement: Supplementary file 1 [file get_supplementary_file.php]

| Gene accession | Description                                                                               |
|----------------|-------------------------------------------------------------------------------------------|
| NP_001002932.1 | von Willebrand factor precursor [Canis lupus familiaris]                                  |
| NP_001002955.1 | RNA-binding protein 47 [Canis lupus familiaris]                                           |
| NP_001002963.1 | hepatocyte growth factor receptor precursor [Canis lupus familiaris]                      |
| NP_001002967.1 | stromelysin-1 precursor [Canis lupus familiaris]                                          |
| NP_001002970.1 | amine oxidase [flavin-containing] B [Canis lupus familiaris]                              |
| NP_001002971.1 | multidrug resistance-associated protein 1 [Canis lupus familiaris]                        |
| NP_001002973.1 | class E basic helix-loop-helix protein 41 [Canis lupus familiaris]                        |
| NP_001002978.1 | transcription factor SOX-9 [Canis lupus familiaris]                                       |
| NP_001002979.1 | collagen alpha-5(IV) chain precursor [Canis lupus familiaris]                             |
| NP_001002980.1 | collagen alpha-1(VII) chain [Canis lupus familiaris]                                      |
| NP_001002984.1 | catalase [Canis lupus familiaris]                                                         |
| NP_001002985.1 | reversion-inducing cysteine-rich protein with Kazal motifs [Canis lupus familiaris]       |
| NP_001002994.1 | sodium channel protein type 5 subunit alpha [Canis lupus familiaris]                      |
| NP_001002995.1 | rho guanine nucleotide exchange factor 2 isoform A [Canis lupus familiaris]               |
| NP_001002997.1 | thymic stromal cotransporter homolog [Canis lupus familiaris]                             |
| NP_001003009.1 | thyroid peroxidase precursor [Canis lupus familiaris]                                     |
| NP_001003022.1 | rho GTPase-activating protein 35 [Canis lupus familiaris]                                 |
| NP_001003023.1 | prostaglandin G/H synthase 1 [Canis lupus familiaris]                                     |
| NP_001003026.1 | serum albumin precursor [Canis lupus familiaris]                                          |
| NP_001003027.1 | alpha-fetoprotein precursor [Canis lupus familiaris]                                      |
| NP_001003032.1 | cAMP-dependent protein kinase catalytic subunit alpha [Canis lupus familiaris]            |
| NP_001003033.1 | serine/threonine-protein phosphatase PP1-gamma catalytic subunit [Canis lupus familiaris] |
| NP_001003034.1 | serine/threonine-protein phosphatase PP1-beta catalytic subunit [Canis lupus familiaris]  |
| NP_001003035.1 | superoxide dismutase [Cu-Zn] [Canis lupus familiaris]                                     |
| NP_001003036.1 | solute carrier family 15 member 1 [Canis lupus familiaris]                                |
| NP_001003039.1 | annexin A4 [Canis lupus familiaris]                                                       |
| NP_001003040.1 | oxygen-regulated protein 1 [Canis lupus familiaris]                                       |
| NP_001003046.1 | mitochondrial brown fat uncoupling protein 1 [Canis lupus familiaris]                     |
| NP_001003048.1 | mitochondrial uncoupling protein 2 [Canis lupus familiaris]                               |
| NP_001003057.1 | Treacher Collins-Franceschetti syndrome 1 [Canis lupus familiaris]                        |
| NP_001003059.2 | UDP-galactose translocator [Canis lupus familiaris]                                       |
| NP_001003064.1 | serine/threonine-protein phosphatase PP1-alpha catalytic subunit [Canis lupus familiaris] |
| NP_001003067.1 | heat shock 70 kDa protein 1 [Canis lupus familiaris]                                      |
| NP_001003073.1 | rod cGMP-specific 3',5'-cyclic phosphodiesterase subunit alpha [Canis lupus familiaris]   |
| NP_001003074.1 | progesterone receptor [Canis lupus familiaris]                                            |

|                |                                                                                         |
|----------------|-----------------------------------------------------------------------------------------|
| NP_001003077.1 | interleukin-10 precursor [Canis lupus familiaris]                                       |
| NP_001003081.1 | canalicular multispecific organic anion transporter 1 [Canis lupus familiaris]          |
| NP_001003083.1 | platelet glycoprotein Ib alpha chain precursor [Canis lupus familiaris]                 |
| NP_001003090.1 | collagen alpha-1(I) chain precursor [Canis lupus familiaris]                            |
| NP_001003094.1 | pro-epidermal growth factor precursor [Canis lupus familiaris]                          |
| NP_001003098.1 | homeobox protein MSX-2 [Canis lupus familiaris]                                         |
| NP_001003104.1 | galactokinase [Canis lupus familiaris]                                                  |
| NP_001003109.1 | neutral and basic amino acid transport protein rBAT [Canis lupus familiaris]            |
| NP_001003112.1 | uveal autoantigen with coiled-coil domains and ankyrin repeats [Canis lupus familiaris] |
| NP_001003113.1 | potassium voltage-gated channel subfamily C member 1 [Canis lupus familiaris]           |
| NP_001003123.1 | growth hormone receptor precursor [Canis lupus familiaris]                              |
| NP_001003127.1 | Y-box protein ZONAB-A [Canis lupus familiaris]                                          |
| NP_001003136.1 | excitatory amino acid transporter 1 [Canis lupus familiaris]                            |
| NP_001003140.1 | tight junction protein ZO-1 [Canis lupus familiaris]                                    |
| NP_001003141.1 | tyrosine-protein kinase Fer [Canis lupus familiaris]                                    |
| NP_001003143.1 | ADP-ribosyl cyclase 1 [Canis lupus familiaris]                                          |
| NP_001003145.1 | potassium voltage-gated channel subfamily H member 2 [Canis lupus familiaris]           |
| NP_001003148.1 | cubilin precursor [Canis lupus familiaris]                                              |
| NP_001003160.1 | trans-1,2-dihydrobenzene-1,2-diol dehydrogenase [Canis lupus familiaris]                |
| NP_001003162.1 | integrin beta-3 [Canis lupus familiaris]                                                |
| NP_001003163.1 | integrin alpha-IIb [Canis lupus familiaris]                                             |
| NP_001003164.1 | alpha-centractin [Canis lupus familiaris]                                               |
| NP_001003171.1 | high affinity immunoglobulin epsilon receptor subunit gamma [Canis lupus familiaris]    |
| NP_001003179.1 | ribosome-binding protein 1 [Canis lupus familiaris]                                     |
| NP_001003181.1 | mast/stem cell growth factor receptor [Canis lupus familiaris]                          |
| NP_001003184.1 | rab GDP dissociation inhibitor beta [Canis lupus familiaris]                            |
| NP_001003185.1 | rab GDP dissociation inhibitor alpha [Canis lupus familiaris]                           |
| NP_001003187.1 | collagen alpha-2(I) chain precursor [Canis lupus familiaris]                            |
| NP_001003188.1 | cGMP-specific 3',5'-cyclic phosphodiesterase [Canis lupus familiaris]                   |
| NP_001003191.1 | beta-glucuronidase precursor [Canis lupus familiaris]                                   |
| NP_001003194.1 | renin precursor [Canis lupus familiaris]                                                |
| NP_001003198.1 | platelet-activating factor acetylhydrolase [Canis lupus familiaris]                     |
| NP_001003204.1 | tight junction protein ZO-2 [Canis lupus familiaris]                                    |
| NP_001003206.1 | mitogen-activated protein kinase 14 [Canis lupus familiaris]                            |
| NP_001003214.1 | sarcoplasmic/endoplasmic reticulum calcium ATPase 2 [Canis lupus familiaris]            |
| NP_001003215.1 | multidrug resistance protein 1 [Canis lupus familiaris]                                 |

|                |                                                                                                                  |
|----------------|------------------------------------------------------------------------------------------------------------------|
| NP_001003216.1 | syntaxin-binding protein 2 [Canis lupus familiaris]                                                              |
| NP_001003217.1 | receptor tyrosine-protein kinase erbB-2 precursor [Canis lupus familiaris]                                       |
| NP_001003220.1 | podoplanin precursor [Canis lupus familiaris]                                                                    |
| NP_001003227.1 | nuclear receptor subfamily 4 group A member 1 [Canis lupus familiaris]                                           |
| NP_001003232.1 | calnexin precursor [Canis lupus familiaris]                                                                      |
| NP_001003236.1 | guanine nucleotide-binding protein G(l)/G(s)/G(t) subunit beta-1 [Canis lupus familiaris]                        |
| NP_001003238.1 | galactocerebrosidase precursor [Canis lupus familiaris]                                                          |
| NP_001003244.4 | tumor necrosis factor [Canis lupus familiaris]                                                                   |
| NP_001003247.1 | potassium voltage-gated channel subfamily B member 2 [Canis lupus familiaris]                                    |
| NP_001003248.1 | paired box protein Pax-8 [Canis lupus familiaris]                                                                |
| NP_001003249.1 | guanine nucleotide-binding protein G(q) subunit alpha [Canis lupus familiaris]                                   |
| NP_001003250.1 | tissue alpha-L-fucosidase [Canis lupus familiaris]                                                               |
| NP_001003256.1 | vasodilator-stimulated phosphoprotein [Canis lupus familiaris]                                                   |
| NP_001003258.1 | vesicular integral-membrane protein VIP36 precursor [Canis lupus familiaris]                                     |
| NP_001003263.1 | guanine nucleotide-binding protein G(s) subunit alpha [Canis lupus familiaris]                                   |
| NP_001003266.1 | calcitonin precursor [Canis lupus familiaris]                                                                    |
| NP_001003267.1 | translocating chain-associated membrane protein 1 [Canis lupus familiaris]                                       |
| NP_001003268.1 | transcription factor 4 [Canis lupus familiaris]                                                                  |
| NP_001003271.2 | signal recognition particle 68 kDa protein [Canis lupus familiaris]                                              |
| NP_001003280.1 | 5-hydroxytryptamine receptor 1D [Canis lupus familiaris]                                                         |
| NP_001003283.1 | sodium/potassium-transporting ATPase subunit beta-1 [Canis lupus familiaris]                                     |
| NP_001003294.1 | dihydrolipoyl dehydrogenase, mitochondrial precursor [Canis lupus familiaris]                                    |
| NP_001003298.1 | vascular cell adhesion protein 1 precursor [Canis lupus familiaris]                                              |
| NP_001003306.1 | sodium/potassium-transporting ATPase subunit alpha-1 precursor [Canis lupus familiaris]                          |
| NP_001003308.1 | solute carrier family 2, facilitated glucose transporter member 3 [Canis lupus familiaris]                       |
| NP_001003312.1 | signal peptidase complex catalytic subunit SEC11C [Canis lupus familiaris]                                       |
| NP_001003315.1 | protein transport protein Sec61 subunit alpha isoform 1 [Canis lupus familiaris]                                 |
| NP_001003321.1 | dolichyl-diphosphooligosaccharide--protein glycosyltransferase 48 kDa subunit precursor [Canis lupus familiaris] |
| NP_001003324.1 | signal peptidase complex subunit 2 [Canis lupus familiaris]                                                      |
| NP_001003327.1 | endoplasmin precursor [Canis lupus familiaris]                                                                   |
| NP_001003342.1 | potassium-transporting ATPase alpha chain 1 [Canis lupus familiaris]                                             |
| NP_001003343.1 | dystrophin [Canis lupus familiaris]                                                                              |
| NP_001003344.1 | nuclear factor NF-kappa-B p105 subunit [Canis lupus familiaris]                                                  |
| NP_001003349.1 | beta-actin-like [Canis lupus familiaris]                                                                         |
| NP_001003351.1 | laminin subunit gamma-2 [Canis lupus familiaris]                                                                 |
| NP_001003352.1 | neurofilament heavy polypeptide [Canis lupus familiaris]                                                         |

|                |                                                                                      |
|----------------|--------------------------------------------------------------------------------------|
| NP_001003360.2 | retinal-specific ATP-binding cassette transporter [Canis lupus familiaris]           |
| NP_001003361.1 | inversin [Canis lupus familiaris]                                                    |
| NP_001003363.1 | pleckstrin [Canis lupus familiaris]                                                  |
| NP_001003364.1 | guanine nucleotide-binding protein G(i) subunit alpha-2 [Canis lupus familiaris]     |
| NP_001003366.1 | microcephalin [Canis lupus familiaris]                                               |
| NP_001003382.1 | beta-type platelet-derived growth factor receptor precursor [Canis lupus familiaris] |
| NP_001003386.1 | keratin, type II cytoskeletal 2 epidermal [Canis lupus familiaris]                   |
| NP_001003392.1 | keratin, type II cytoskeletal 1 [Canis lupus familiaris]                             |
| NP_001005258.1 | small inducible cytokine A21 [Canis lupus familiaris]                                |
| NP_001005264.2 | toll-like receptor 2 precursor [Canis lupus familiaris]                              |
| NP_001005378.1 | fucosyltransferase 5 [Canis lupus familiaris]                                        |
| NP_001005756.1 | corticosteroid 11-beta-dehydrogenase isozyme 1 [Canis lupus familiaris]              |
| NP_001005757.1 | G1/S-specific cyclin-D1 [Canis lupus familiaris]                                     |
| NP_001006601.1 | amyloid beta A4 protein [Canis lupus familiaris]                                     |
| NP_001006651.1 | polycystin-1 [Canis lupus familiaris]                                                |
| NP_001006652.1 | DNA-dependent protein kinase catalytic subunit [Canis lupus familiaris]              |
| NP_001006654.2 | breast cancer 2, early onset [Canis lupus familiaris]                                |
| NP_001006952.1 | collagen alpha-1(II) chain [Canis lupus familiaris]                                  |
| NP_001008715.1 | cytochrome P450 19A1 [Canis lupus familiaris]                                        |
| NP_001008716.1 | protein kinase C delta type [Canis lupus familiaris]                                 |
| NP_001008719.1 | glutamate [NMDA] receptor subunit epsilon-2 precursor [Canis lupus familiaris]       |
| NP_001011887.1 | C-X-C chemokine receptor type 3 [Canis lupus familiaris]                             |
| NP_001012340.1 | RAC-beta serine/threonine-protein kinase [Canis lupus familiaris]                    |
| NP_001012394.1 | desmin [Canis lupus familiaris]                                                      |
| NP_001012395.1 | utrophin [Canis lupus familiaris]                                                    |
| NP_001012663.1 | retinoic acid receptor alpha [Canis lupus familiaris]                                |
| NP_001012737.1 | zinc finger protein Gfi-1 [Canis lupus familiaris]                                   |
| NP_001013013.1 | F-actin-capping protein subunit alpha-2 [Canis lupus familiaris]                     |
| NP_001013434.1 | breast cancer type 1 susceptibility protein homolog [Canis lupus familiaris]         |
| NP_001013443.1 | keratin, type I cytoskeletal 10 [Canis lupus familiaris]                             |
| NP_001014299.1 | keratin, type II cytoskeletal 2 oral [Canis lupus familiaris]                        |
| NP_001014307.1 | keratin, type I cytoskeletal 9 [Canis lupus familiaris]                              |
| NP_001014397.1 | NF-kappa-B inhibitor-like protein 1 [Canis lupus familiaris]                         |
| NP_001014398.1 | V-type proton ATPase subunit G 1 [Canis lupus familiaris]                            |
| NP_001014399.1 | spliceosome RNA helicase DDX39B [Canis lupus familiaris]                             |
| NP_001014400.1 | MHC class I DLA-64 [Canis lupus familiaris]                                          |

|                |                                                                                         |
|----------------|-----------------------------------------------------------------------------------------|
| NP_001014401.1 | MHC class I DLA-12 [Canis lupus familiaris]                                             |
| NP_001014767.1 | MHC class I DLA-88 [Canis lupus familiaris]                                             |
| NP_001018044.1 | guanylate cyclase soluble subunit beta-1 [Canis lupus familiaris]                       |
| NP_001018045.1 | guanylate cyclase soluble subunit alpha-3 [Canis lupus familiaris]                      |
| NP_001019809.1 | nucleoside diphosphate kinase B [Canis lupus familiaris]                                |
| NP_001020438.1 | copper-transporting ATPase 2 [Canis lupus familiaris]                                   |
| NP_001020568.1 | serine protease inhibitor Kazal-type 5 [Canis lupus familiaris]                         |
| NP_001020792.1 | cathepsin D precursor [Canis lupus familiaris]                                          |
| NP_001026988.1 | collagen alpha-4(IV) chain [Canis lupus familiaris]                                     |
| NP_001028682.1 | lymphotoxin-beta [Canis lupus familiaris]                                               |
| NP_001028683.1 | fas-activated serine/threonine kinase [Canis lupus familiaris]                          |
| NP_001028684.1 | FUN14 domain-containing protein 2 [Canis lupus familiaris]                              |
| NP_001033756.1 | EGF-like module-containing mucin-like hormone receptor-like 2 [Canis lupus familiaris]  |
| NP_001033757.1 | EGF-like module-containing mucin-like hormone receptor-like 1 [Canis lupus familiaris]  |
| NP_001038214.1 | aldehyde oxidase 2 [Canis lupus familiaris]                                             |
| NP_001041481.1 | heat shock 70 kDa protein 4 [Canis lupus familiaris]                                    |
| NP_001041485.1 | scavenger receptor cysteine-rich type 1 protein M130 precursor [Canis lupus familiaris] |
| NP_001041489.1 | vascular endothelial growth factor receptor 2 [Canis lupus familiaris]                  |
| NP_001041490.1 | cytochrome P450 4A37 [Canis lupus familiaris]                                           |
| NP_001041496.1 | band 3 anion transport protein [Canis lupus familiaris]                                 |
| NP_001041497.1 | lysine-specific demethylase 5C [Canis lupus familiaris]                                 |
| NP_001041546.1 | advanced glycosylation end product-specific receptor [Canis lupus familiaris]           |
| NP_001041548.1 | arylsulfatase A [Canis lupus familiaris]                                                |
| NP_001041549.1 | NADH-cytochrome b5 reductase 3 [Canis lupus familiaris]                                 |
| NP_001041552.1 | bromodomain-containing protein 2 [Canis lupus familiaris]                               |
| NP_001041556.1 | 2'-5'-oligoadenylate synthase 3 [Canis lupus familiaris]                                |
| NP_001041557.1 | phosphatidylethanolamine-binding protein 1 [Canis lupus familiaris]                     |
| NP_001041558.1 | 59 kDa 2'-5'-oligoadenylate synthase-like protein [Canis lupus familiaris]              |
| NP_001041559.1 | dual specificity mitogen-activated protein kinase kinase 1 [Canis lupus familiaris]     |
| NP_001041561.1 | glycogen debranching enzyme [Canis lupus familiaris]                                    |
| NP_001041566.1 | tapasin precursor [Canis lupus familiaris]                                              |
| NP_001041569.1 | thyroglobulin [Canis lupus familiaris]                                                  |
| NP_001041573.1 | contactin-associated protein-like 5 precursor [Canis lupus familiaris]                  |
| NP_001041577.1 | transcription factor GATA-4 [Canis lupus familiaris]                                    |
| NP_001041585.1 | N-acetylgalactosamine-6-sulfatase precursor [Canis lupus familiaris]                    |
| NP_001041588.1 | arylsulfatase H [Canis lupus familiaris]                                                |

|                |                                                                                                              |
|----------------|--------------------------------------------------------------------------------------------------------------|
| NP_001041591.1 | angiopoietin-2 precursor [Canis lupus familiaris]                                                            |
| NP_001041592.1 | major histocompatibility complex, class II, DO beta [Canis lupus familiaris]                                 |
| NP_001041593.1 | E3 ubiquitin-protein ligase RING1 [Canis lupus familiaris]                                                   |
| NP_001041595.1 | ras-related protein Rab-27A [Canis lupus familiaris]                                                         |
| NP_001041597.1 | aldehyde oxidase 3 [Canis lupus familiaris]                                                                  |
| NP_001041601.1 | dual specificity mitogen-activated protein kinase kinase 2 [Canis lupus familiaris]                          |
| NP_001070262.1 | myosin-4 [Canis lupus familiaris]                                                                            |
| NP_001070703.1 | myosin-8 [Canis lupus familiaris]                                                                            |
| NP_001070907.1 | glutamate decarboxylase 2 [Canis lupus familiaris]                                                           |
| NP_001073578.1 | serpin peptidase inhibitor, clade A (alpha-1 antiproteinase, antitrypsin), member 1 [Canis lupus familiaris] |
| NP_001074190.1 | CD47 antigen [Canis lupus familiaris]                                                                        |
| NP_001074978.1 | extracellular calcium-sensing receptor [Canis lupus familiaris]                                              |
| NP_001075179.1 | SCO-spondin [Canis lupus familiaris]                                                                         |
| NP_001076836.1 | rho GTPase-activating protein 1 [Canis lupus familiaris]                                                     |
| NP_001091010.1 | neuromedin-K receptor [Canis lupus familiaris]                                                               |
| NP_001091012.1 | glutamate decarboxylase 1 [Canis lupus familiaris]                                                           |
| NP_001091013.1 | paired box gene 6 [Canis lupus familiaris]                                                                   |
| NP_001091019.1 | NPC1 (Niemann-Pick disease, type C1, gene)-like 1 [Canis lupus familiaris]                                   |
| NP_001091022.1 | carcinoembryonic antigen-related cell adhesion molecule 30 [Canis lupus familiaris]                          |
| NP_001091451.1 | zinc finger BED domain-containing protein 5 [Canis lupus familiaris]                                         |
| NP_001093414.1 | rap guanine nucleotide exchange factor 3 [Canis lupus familiaris]                                            |
| NP_001096685.1 | collagen alpha-3(VI) chain [Canis lupus familiaris]                                                          |
| NP_001103426.1 | solute carrier family 23 member 2 [Canis lupus familiaris]                                                   |
| NP_001103428.1 | frataxin [Canis lupus familiaris]                                                                            |
| NP_001103649.1 | prohibitin [Canis lupus familiaris]                                                                          |
| NP_001104237.1 | myosin-9 [Canis lupus familiaris]                                                                            |
| NP_001104239.1 | transient receptor potential cation channel subfamily M member 8 [Canis lupus familiaris]                    |
| NP_001106929.1 | lysine-specific demethylase 5D [Canis lupus familiaris]                                                      |
| NP_001106930.1 | carcinoembryonic antigen-related cell adhesion molecule 25 [Canis lupus familiaris]                          |
| NP_001107184.1 | myosin-3 [Canis lupus familiaris]                                                                            |
| NP_001107186.1 | beta-defensin 124 [Canis lupus familiaris]                                                                   |
| NP_001107189.1 | myosin-1 [Canis lupus familiaris]                                                                            |
| NP_001108097.1 | polyphosphoinositide phosphatase [Canis lupus familiaris]                                                    |
| NP_001108111.1 | ketosamine-3-kinase [Canis lupus familiaris]                                                                 |
| NP_001108138.1 | aristaless related homeobox [Canis lupus familiaris]                                                         |
| NP_001108590.1 | selenoprotein P precursor [Canis lupus familiaris]                                                           |

|                |                                                                                                                       |
|----------------|-----------------------------------------------------------------------------------------------------------------------|
| NP_001116074.1 | cation-independent mannose-6-phosphate receptor [Canis lupus familiaris]                                              |
| NP_001116081.1 | mitochondrial antiviral-signaling protein [Canis lupus familiaris]                                                    |
| NP_001116250.1 | thioredoxin reductase 3 [Canis lupus familiaris]                                                                      |
| NP_001121536.1 | motilin receptor [Canis lupus familiaris]                                                                             |
| NP_001121567.1 | ubiquitin-60S ribosomal protein L40 precursor [Canis lupus familiaris]                                                |
| NP_001124300.1 | serine-protein kinase ATM [Canis lupus familiaris]                                                                    |
| NP_001124309.1 | WD repeat domain 1 [Canis lupus familiaris]                                                                           |
| NP_001124310.1 | R-spondin-1 [Canis lupus familiaris]                                                                                  |
| NP_001128598.1 | galactosylceramide sulfotransferase [Canis lupus familiaris]                                                          |
| NP_001129118.1 | forkhead box protein I3 [Canis lupus familiaris]                                                                      |
| NP_001129260.1 | nephrocystin-4 [Canis lupus familiaris]                                                                               |
| NP_001130035.1 | phosphatidylinositol-4-phosphate 5-kinase, type I, alpha [Canis lupus familiaris]                                     |
| NP_001130036.1 | proteasome (prosome, macropain) 26S subunit, non-ATPase, 4 [Canis lupus familiaris]                                   |
| NP_001130037.1 | 1-phosphatidylinositol-4,5-bisphosphate phosphodiesterase epsilon-1 [Canis lupus familiaris]                          |
| NP_001136142.1 | erythrocyte band 7 integral membrane protein [Canis lupus familiaris]                                                 |
| NP_001137404.1 | bile salt export pump [Canis lupus familiaris]                                                                        |
| NP_001138591.1 | DNA-(apurinic or apyrimidinic site) lyase [Canis lupus familiaris]                                                    |
| NP_001138592.1 | arginase-2, mitochondrial [Canis lupus familiaris]                                                                    |
| NP_001138623.1 | bone morphogenetic protein receptor type-1B [Canis lupus familiaris]                                                  |
| NP_001138642.1 | carbonic anhydrase 2 [Canis lupus familiaris]                                                                         |
| NP_001138967.1 | taste receptor type 2 member 40 [Canis lupus familiaris]                                                              |
| NP_001139453.1 | M-phase phosphoprotein 8 [Canis lupus familiaris]                                                                     |
| NP_001155182.1 | tumor necrosis factor ligand superfamily member 13B [Canis lupus familiaris]                                          |
| NP_001157926.1 | glutathione peroxidase 3 [Canis lupus familiaris]                                                                     |
| NP_001157958.1 | selenoprotein I [Canis lupus familiaris]                                                                              |
| NP_001157959.1 | selenoprotein T [Canis lupus familiaris]                                                                              |
| NP_001158732.1 | angiotensin-converting enzyme 2 [Canis lupus familiaris]                                                              |
| NP_001159351.1 | kallikrein-14 [Canis lupus familiaris]                                                                                |
| NP_001159360.1 | serpin H1 [Canis lupus familiaris]                                                                                    |
| NP_001159480.1 | DAZ interacting protein 1 [Canis lupus familiaris]                                                                    |
| NP_001159519.1 | solute carrier organic anion transporter family, member 1B3 [Canis lupus familiaris]                                  |
| NP_001161170.1 | pleckstrin homology domain containing, family A (phosphoinositide binding specific) member 8 [Canis lupus familiaris] |
| NP_001161484.1 | coiled-coil domain-containing protein 66 [Canis lupus familiaris]                                                     |
| NP_001161932.1 | adenylate cyclase type 5 [Canis lupus familiaris]                                                                     |
| NP_001161945.1 | kinesin-like protein KIF1A [Canis lupus familiaris]                                                                   |
| NP_001162159.1 | testin [Canis lupus familiaris]                                                                                       |

|                |                                                                                                  |
|----------------|--------------------------------------------------------------------------------------------------|
| NP_001165219.1 | RNA binding motif protein 12 [Canis lupus familiaris]                                            |
| NP_001165243.1 | platelet basic protein [Canis lupus familiaris]                                                  |
| NP_001166949.1 | SPEG complex locus [Canis lupus familiaris]                                                      |
| NP_001171276.1 | NADPH--cytochrome P450 reductase [Canis lupus familiaris]                                        |
| NP_001171278.1 | chitinase-3-like protein 1 [Canis lupus familiaris]                                              |
| NP_001181886.1 | clathrin coat assembly protein AP180 [Canis lupus familiaris]                                    |
| NP_001181895.1 | 5,6-dihydroxyindole-2-carboxylic acid oxidase [Canis lupus familiaris]                           |
| NP_001181899.1 | copper chaperone for superoxide dismutase [Canis lupus familiaris]                               |
| NP_001182076.1 | adenylate cyclase type 6 [Canis lupus familiaris]                                                |
| NP_001182078.1 | tenascin [Canis lupus familiaris]                                                                |
| NP_001182331.1 | disintegrin and metalloproteinase domain-containing protein 9 [Canis lupus familiaris]           |
| NP_001183951.1 | CD44 antigen [Canis lupus familiaris]                                                            |
| NP_001183958.1 | keratin 71 [Canis lupus familiaris]                                                              |
| NP_001183964.1 | alpha-1B adrenergic receptor [Canis lupus familiaris]                                            |
| NP_001183974.1 | cytochrome c [Canis lupus familiaris]                                                            |
| NP_001183978.1 | reticulon-3 [Canis lupus familiaris]                                                             |
| NP_001183983.1 | triosephosphate isomerase [Canis lupus familiaris]                                               |
| NP_001184005.1 | abnormal spindle-like microcephaly-associated protein homolog [Canis lupus familiaris]           |
| NP_001184012.1 | sterol regulatory element-binding protein 1 [Canis lupus familiaris]                             |
| NP_001184013.1 | plasma membrane calcium-transporting ATPase 1 [Canis lupus familiaris]                           |
| NP_001184025.1 | serine/threonine-protein phosphatase 2B catalytic subunit alpha isoform [Canis lupus familiaris] |
| NP_001184048.1 | transmembrane protein 132C [Canis lupus familiaris]                                              |
| NP_001184049.1 | tryptophan 5-hydroxylase 2 [Canis lupus familiaris]                                              |
| NP_001184066.1 | alkaline phosphatase, tissue-nonspecific isozyme [Canis lupus familiaris]                        |
| NP_001184078.1 | vasopressin-neurophysin 2-copeptin [Canis lupus familiaris]                                      |
| NP_001184087.1 | kallikrein-10 preproprotein [Canis lupus familiaris]                                             |
| NP_001184099.1 | collagen alpha-2(IX) chain [Canis lupus familiaris]                                              |
| NP_001184100.1 | collagen alpha-3(IX) chain [Canis lupus familiaris]                                              |
| NP_001184103.1 | multidrug resistance-associated protein 4 [Canis lupus familiaris]                               |
| NP_001184105.1 | toll-like receptor 5 [Canis lupus familiaris]                                                    |
| NP_001184111.1 | perforin-1 precursor [Canis lupus familiaris]                                                    |
| NP_001184241.1 | liprin-beta-1 [Canis lupus familiaris]                                                           |
| NP_001184243.1 | hypothetical protein LOC486627 [Canis lupus familiaris]                                          |
| NP_001191024.1 | ankyrin repeat and KH domain-containing protein 1 [Canis lupus familiaris]                       |
| NP_001191267.1 | transmembrane emp24 domain-containing protein 7 [Canis lupus familiaris]                         |
| NP_001191336.1 | proline-rich protein 5 [Canis lupus familiaris]                                                  |



|                |                                                                                                                            |
|----------------|----------------------------------------------------------------------------------------------------------------------------|
| NP_001191685.1 | translocon-associated protein subunit delta [Canis lupus familiaris]                                                       |
| NP_001191984.1 | ankyrin repeat and SOCS box protein 3 [Canis lupus familiaris]                                                             |
| NP_001192091.1 | zinc finger and BTB domain-containing protein 4 [Canis lupus familiaris]                                                   |
| NP_001192132.1 | myocyte-specific enhancer factor 2B [Canis lupus familiaris]                                                               |
| NP_001192187.1 | matrin-3 [Canis lupus familiaris]                                                                                          |
| NP_001193866.1 | N-acetyllactosaminide alpha-1,3-galactosyltransferase [Canis lupus familiaris]                                             |
| NP_001207410.1 | spectrin beta chain, erythrocyte [Canis lupus familiaris]                                                                  |
| NP_001229641.1 | ADAM metalloproteinase with thrombospondin type 1 motif, 13 [Canis lupus familiaris]                                       |
| NP_001229646.1 | plasma kallikrein [Canis lupus familiaris]                                                                                 |
| NP_001229655.1 | matrilysin [Canis lupus familiaris]                                                                                        |
| NP_008474.4    | COX2_15041 cytochrome c oxidase subunit II [Canis lupus familiaris]                                                        |
| XP_531626.2    | PREDICTED: similar to diacylglycerol kinase, alpha 80kDa isoform 2                                                         |
| XP_531629.2    | PREDICTED: similar to Proliferation-associated protein 2G4 (Cell cycle protein p38-2G4 homolog) (hG4-1)                    |
| XP_531630.2    | PREDICTED: similar to family with sequence similarity 62 (C2 domain containing), member A                                  |
| XP_531631.2    | PREDICTED: similar to myosin, light polypeptide 6, alkali, smooth muscle and non-muscle isoform 1                          |
| XP_531634.2    | PREDICTED: similar to citrate synthase                                                                                     |
| XP_531639.2    | PREDICTED: similar to ATP synthase beta chain, mitochondrial precursor isoform 1                                           |
| XP_531645.2    | PREDICTED: similar to Rho-GTPase-activating protein 9                                                                      |
| XP_531654.2    | PREDICTED: similar to leucine-rich repeats and immunoglobulin-like domains 3                                               |
| XP_531656.2    | PREDICTED: similar to protein phosphatase 1H (PP2C domain containing)                                                      |
| XP_531664.2    | PREDICTED: similar to Glutamate receptor-interacting protein 1 (GRIP1 protein)                                             |
| XP_531667.2    | PREDICTED: similar to TIP120 protein isoform 5                                                                             |
| XP_531669.2    | PREDICTED: similar to Mdm4, transformed 3T3 cell double minute 1, p53 binding protein isoform 1                            |
| XP_531675.2    | PREDICTED: similar to chaperonin containing TCP1, subunit 2 isoform 1                                                      |
| XP_531679.2    | PREDICTED: hypothetical protein XP_531679                                                                                  |
| XP_531681.2    | PREDICTED: similar to TBC1 domain family, member 15                                                                        |
| XP_531688.2    | PREDICTED: similar to kleisin beta isoform 2                                                                               |
| XP_531689.2    | PREDICTED: similar to Plexin B2 precursor (MM1)                                                                            |
| XP_531690.2    | PREDICTED: similar to MOV10-like 1                                                                                         |
| XP_531691.2    | PREDICTED: similar to tubulin tyrosine ligase-like family, member 3 isoform 1                                              |
| XP_531696.2    | PREDICTED: similar to Polycystic kidney disease and receptor for egg jelly related protein precursor (PKD and REJ homolog) |
| XP_531698.2    | PREDICTED: similar to Fibulin-1 precursor                                                                                  |
| XP_531700.2    | PREDICTED: similar to Nucleoporin 50 kDa (Nuclear pore-associated protein 60 kDa-like)                                     |
| XP_531703.2    | PREDICTED: similar to CG1550-PA                                                                                            |
| XP_531709.2    | PREDICTED: similar to DNA polymerase delta interacting protein 3 isoform 1                                                 |
| XP_531710.2    | PREDICTED: similar to serine hydrolase-like 2                                                                              |

|             |                                                                                                                                            |
|-------------|--------------------------------------------------------------------------------------------------------------------------------------------|
| XP_531712.2 | PREDICTED: similar to NADH dehydrogenase (ubiquinone) 1 alpha subcomplex, 6, 14kDa                                                         |
| XP_531724.2 | PREDICTED: similar to heat shock 70kD protein binding protein isoform 1                                                                    |
| XP_531727.2 | PREDICTED: similar to adenylosuccinate lyase isoform 1                                                                                     |
| XP_531732.2 | PREDICTED: similar to 60S ribosomal protein L3 (L4) isoform 2                                                                              |
| XP_531744.1 | PREDICTED: similar to 3-mercaptopyruvate sulfurtransferase                                                                                 |
| XP_531749.2 | PREDICTED: similar to apolipoprotein L5                                                                                                    |
| XP_531762.2 | PREDICTED: similar to CG13957-PA                                                                                                           |
| XP_531769.2 | PREDICTED: similar to LIM and senescent cell antigen-like domains 1 isoform 1                                                              |
| XP_531770.2 | PREDICTED: similar to GRIP and coiled-coil domain-containing 2 isoform a                                                                   |
| XP_531781.2 | PREDICTED: similar to neuronal PAS domain protein 2                                                                                        |
| XP_531794.2 | PREDICTED: similar to RW1 protein                                                                                                          |
| XP_531823.2 | PREDICTED: similar to proteasome (prosome, macropain) activator subunit 4                                                                  |
| XP_531824.2 | PREDICTED: similar to muscle-type acylphosphatase 2                                                                                        |
| XP_531825.2 | PREDICTED: hypothetical protein XP_531825                                                                                                  |
| XP_531827.2 | PREDICTED: similar to Spectrin beta chain, brain 1 (Spectrin, non-erythroid beta chain 1) (Beta-II spectrin) (Fodrin beta chain) isoform 1 |
| XP_531828.1 | PREDICTED: similar to reticulon 4 isoform C isoform 1                                                                                      |
| XP_531829.2 | PREDICTED: similar to ubiquitin and ribosomal protein S27a precursor                                                                       |
| XP_531834.1 | PREDICTED: similar to EGF-containing fibulin-like extracellular matrix protein 1 isoform a precursor                                       |
| XP_531839.2 | PREDICTED: similar to exportin 1, CRM1 homolog isoform 1                                                                                   |
| XP_531844.1 | PREDICTED: similar to Malate dehydrogenase, cytoplasmic isoform 1                                                                          |
| XP_531845.2 | PREDICTED: similar to UDP-glucose pyrophosphorylase 2 isoform a isoform 1                                                                  |
| XP_531846.2 | PREDICTED: similar to vacuolar protein sorting 54 isoform 1 isoform 1                                                                      |
| XP_531851.2 | PREDICTED: similar to ETAA16 protein                                                                                                       |
| XP_531854.2 | PREDICTED: similar to glucosamine-fructose-6-phosphate aminotransferase                                                                    |
| XP_531855.2 | PREDICTED: similar to AP2 associated kinase 1                                                                                              |
| XP_531865.2 | PREDICTED: similar to COMM domain containing protein 10                                                                                    |
| XP_531869.2 | PREDICTED: similar to Tripartite motif protein 36 (Zinc-binding protein Rbcc728) (RING finger protein 98)                                  |
| XP_531871.2 | PREDICTED: similar to YTH domain containing 2                                                                                              |
| XP_531878.2 | PREDICTED: similar to zinc finger protein 91 (HPF7, HTF10)                                                                                 |
| XP_531880.2 | PREDICTED: similar to Zinc finger protein 208                                                                                              |
| XP_531882.2 | PREDICTED: similar to mitogen-activated protein kinase 9 isoform 1 isoform 1                                                               |
| XP_531886.2 | PREDICTED: similar to sorting nexin 2 isoform 1                                                                                            |
| XP_531888.2 | PREDICTED: similar to CG6014-PA                                                                                                            |
| XP_531891.2 | PREDICTED: similar to CG3304-PA, isoform A                                                                                                 |
| XP_531893.2 | PREDICTED: similar to MEGF10 protein                                                                                                       |
| XP_531894.2 | PREDICTED: similar to solute carrier family 27 (fatty acid transporter), member 6                                                          |

|             |                                                                                                                                                                                           |
|-------------|-------------------------------------------------------------------------------------------------------------------------------------------------------------------------------------------|
| XP_531901.2 | PREDICTED: similar to RAD50 homolog isoform 1                                                                                                                                             |
| XP_531907.1 | PREDICTED: similar to Voltage-dependent anion-selective channel protein 1 (VDAC-1) (hVDAC1) (Outer mitochondrial membrane protein porin 1) (Plasmalemmal porin) (Porin 31HL) (Porin 31HM) |
| XP_531911.2 | PREDICTED: similar to DEAD (Asp-Glu-Ala-Asp) box polypeptide 46                                                                                                                           |
| XP_531916.2 | PREDICTED: similar to Protein C5orf5 (GAP-like protein N61) isoform 1                                                                                                                     |
| XP_531921.2 | PREDICTED: similar to jumonji domain containing 1B                                                                                                                                        |
| XP_531929.2 | PREDICTED: similar to 26S proteasome non-ATPase regulatory subunit 5 (26S proteasome subunit S5B) (26S protease subunit S5 basic)                                                         |
| XP_531935.2 | PREDICTED: similar to multiple PDZ domain protein                                                                                                                                         |
| XP_531940.2 | PREDICTED: similar to Myosin-3 (Myosin heavy chain A) (MHC A)                                                                                                                             |
| XP_531943.2 | PREDICTED: similar to ADAMTS-like 1 isoform 1                                                                                                                                             |
| XP_531945.2 | PREDICTED: similar to Ras-related GTP-binding protein ragA                                                                                                                                |
| XP_531962.2 | PREDICTED: similar to Protein C9orf82                                                                                                                                                     |
| XP_531963.2 | PREDICTED: similar to phospholipase A2, activating protein isoform 1                                                                                                                      |
| XP_531978.2 | PREDICTED: similar to CG11909-PA                                                                                                                                                          |
| XP_531991.2 | PREDICTED: similar to bile acid beta-glucosidase                                                                                                                                          |
| XP_531993.2 | PREDICTED: similar to Atrial natriuretic peptide receptor B precursor (ANP-B) (ANPRB) (GC-B) (Guanylate cyclase B) (NPR-B) (Atrial natriuretic peptide B-type receptor)                   |
| XP_531995.2 | PREDICTED: similar to calicin                                                                                                                                                             |
| XP_532003.2 | PREDICTED: similar to 80 kDa nuclear cap binding protein (NCBP 80 kDa subunit) (CBP80) isoform 1                                                                                          |
| XP_532006.2 | PREDICTED: similar to Acidic leucine-rich nuclear phosphoprotein 32 family member B (PHAPI2 protein) (Silver-stainable protein SSP29) (Acidic protein rich in leucines)                   |
| XP_532009.2 | PREDICTED: similar to Collagen alpha 1(XV) chain precursor                                                                                                                                |
| XP_532010.2 | PREDICTED: similar to alpha-1,3-mannosyltransferase ALG2 isoform 1                                                                                                                        |
| XP_532011.2 | PREDICTED: similar to Thioredoxin domain containing protein 4 precursor (Endoplasmic reticulum resident protein ERp44)                                                                    |
| XP_532012.1 | PREDICTED: similar to Testis expressed sequence 10 protein isoform 1                                                                                                                      |
| XP_532018.2 | PREDICTED: similar to ring finger protein 20                                                                                                                                              |
| XP_532020.2 | PREDICTED: similar to topoisomerase I binding, arginine/serine-rich                                                                                                                       |
| XP_532023.2 | PREDICTED: similar to FSD1-like                                                                                                                                                           |
| XP_532028.2 | PREDICTED: similar to erythrocyte membrane protein band 4.1 like 4B isoform 2                                                                                                             |
| XP_532030.2 | PREDICTED: similar to sushi, von Willebrand factor type A, EGF and pentraxin domain containing 1                                                                                          |
| XP_532031.2 | PREDICTED: similar to endothelial differentiation, lysophosphatidic acid G-protein-coupled receptor, 2 isoform 1                                                                          |
| XP_532033.2 | PREDICTED: similar to NADP-dependent leukotriene B4 12-hydroxydehydrogenase (15-oxoprostaglandin 13-reductase) isoform 1                                                                  |
| XP_532040.2 | PREDICTED: similar to zinc finger protein 618                                                                                                                                             |
| XP_532042.2 | PREDICTED: similar to collagen, type XXVII, alpha 1                                                                                                                                       |
| XP_532046.2 | PREDICTED: similar to complement component 5                                                                                                                                              |
| XP_532047.2 | PREDICTED: similar to centrosomal protein 1                                                                                                                                               |
| XP_532048.2 | PREDICTED: similar to RAB14, member RAS oncogene family isoform 1                                                                                                                         |
| XP_532052.2 | PREDICTED: similar to Cofactor required for Sp1 transcriptional activation subunit 3 (Transcriptional coactivator CRSP130) (Vitamin D3 receptor-interacting protein complex)              |

130 kDa component) (DRIP130) (Activator-recruited cofactor 130 kDa component) (ARC130)...

XP\_532058.2 PREDICTED: similar to Protein C6orf136

XP\_532059.2 PREDICTED: similar to Mediator of DNA damage checkpoint protein 1 (Nuclear factor with BRCT domains 1)

XP\_532075.2 PREDICTED: similar to casein kinase 2, beta subunit

XP\_532077.2 PREDICTED: similar to HLA-B associated transcript 5 isoform 1

XP\_532080.2 PREDICTED: similar to mutS homolog 5 isoform c isoform 1

XP\_532082.1 PREDICTED: similar to heat shock 70kDa protein 1-like isoform 1

XP\_532084.2 PREDICTED: similar to HLA-B associated transcript 8 isoform a

XP\_532086.2 PREDICTED: similar to Complement factor B precursor (C3/C5 convertase) (Properdin factor B) (Glycine-rich beta glycoprotein) (GBG) (PBF2) isoform 1

XP\_532087.1 PREDICTED: similar to Negative elongation factor E (NELF-E) (RD protein)

XP\_532099.2 PREDICTED: similar to transporter 2, ATP-binding cassette, sub-family B isoform 1

XP\_532101.2 PREDICTED: similar to Antigen peptide transporter 1 (APT1) (Peptide transporter TAP1) (ATP-binding cassette, sub-family B, member 2) (Peptide transporter PSF1) (Peptide supply factor 1) (PSF-1) (Peptide transporter involved in antigen processing 1)...

XP\_532116.1 PREDICTED: similar to Transcription initiation factor TFIID subunit 11 (Transcription initiation factor TFIID 28 kDa subunit) (TAF(II)28) (TAFII-28) (TAFII28) (TFIID subunit p30-beta) isoform 1

XP\_532117.2 PREDICTED: similar to t-complex 11

XP\_532122.2 PREDICTED: similar to solute carrier family 26, member 8 isoform a

XP\_532125.2 PREDICTED: similar to cyclin-dependent kinase inhibitor 1A

XP\_532128.2 PREDICTED: similar to MAM domain containing glycosylphosphatidylinositol anchor 1

XP\_532130.2 PREDICTED: similar to dynein, axonemal, heavy chain 8

XP\_532133.2 PREDICTED: similar to triggering receptor expressed on myeloid cells-like 1

XP\_532134.2 PREDICTED: similar to Ubiquitin carboxyl-terminal hydrolase 49 (Ubiquitin thiolesterase 49) (Ubiquitin-specific processing protease 49) (Deubiquitinating enzyme 49)

XP\_532138.2 PREDICTED: similar to ubiquitin protein ligase E3 component n-recognin 2 isoform 1

XP\_532139.2 PREDICTED: hypothetical protein XP\_532139

XP\_532148.2 PREDICTED: similar to exportin 5 isoform 2

XP\_532150.2 PREDICTED: similar to polymerase (DNA directed), eta

XP\_532154.2 PREDICTED: similar to heat shock protein 1, beta isoform 1

XP\_532155.2 PREDICTED: similar to alanyl-tRNA synthetase like

XP\_532159.2 PREDICTED: similar to tudor domain containing 6

XP\_532164.2 PREDICTED: similar to Methylmalonyl-CoA mutase, mitochondrial precursor (MCM) (Methylmalonyl-CoA isomerase)

XP\_532167.1 PREDICTED: similar to Phosphoglycerate kinase, testis specific

XP\_532169.2 PREDICTED: similar to Polycystic kidney and hepatic disease 1 precursor (Fibrocystin) (Polyductin) (Tigmin)

XP\_532171.2 PREDICTED: similar to Translocation associated membrane protein 2

XP\_532180.2 PREDICTED: similar to alpha 1 type XXI collagen precursor

XP\_532183.2 PREDICTED: similar to dystonin isoform b isoform 1

XP\_532184.2 PREDICTED: similar to Zinc finger protein 451 (Coactivator for steroid receptors) isoform 2

|             |                                                                                                                                                                                  |
|-------------|----------------------------------------------------------------------------------------------------------------------------------------------------------------------------------|
| XP_532185.2 | PREDICTED: similar to DNA primase large subunit, 58kDa isoform 1                                                                                                                 |
| XP_532200.2 | PREDICTED: similar to potassium voltage-gated channel, KQT-like subfamily, member 5 isoform 1                                                                                    |
| XP_532205.2 | PREDICTED: similar to CD109                                                                                                                                                      |
| XP_532208.2 | PREDICTED: similar to transmembrane protein 30A isoform 1                                                                                                                        |
| XP_532211.2 | PREDICTED: similar to pleckstrin homology domain interacting protein isoform 1                                                                                                   |
| XP_532215.2 | PREDICTED: similar to pad-1-like isoform 1 isoform 1                                                                                                                             |
| XP_532217.2 | PREDICTED: similar to NADP-dependent malic enzyme (NADP-ME) (Malic enzyme 1)                                                                                                     |
| XP_532227.2 | PREDICTED: similar to Protein C6orf165 isoform 1                                                                                                                                 |
| XP_532232.2 | PREDICTED: similar to Midasin (MIDAS-containing protein) isoform 1                                                                                                               |
| XP_532234.2 | PREDICTED: similar to ephrin receptor EphA7 isoform 1                                                                                                                            |
| XP_532248.2 | PREDICTED: similar to absent in melanoma 1                                                                                                                                       |
| XP_532252.2 | PREDICTED: similar to Translocation protein SEC63 homolog                                                                                                                        |
| XP_532267.2 | PREDICTED: similar to fyn proto-oncogene isoform 1                                                                                                                               |
| XP_532269.2 | PREDICTED: similar to laminin, alpha 4 precursor                                                                                                                                 |
| XP_532274.2 | PREDICTED: hypothetical protein XP_532274                                                                                                                                        |
| XP_532275.2 | PREDICTED: similar to Proteasome subunit beta type 1 (Proteasome component C5) (Macropain subunit C5) (Multicatalytic endopeptidase complex subunit C5) (Proteasome gamma chain) |
| XP_532278.2 | PREDICTED: similar to Ribonuclease UK114 (14.5 kDa translational inhibitor protein) (p14.5) (UK114 antigen homolog) isoform 1                                                    |
| XP_532280.2 | PREDICTED: similar to Serine/threonine-protein kinase 3 (STE20-like kinase MST2) (MST-2) (Mammalian STE20-like protein kinase 2) (Serine/threonine-protein kinase Krs-1)         |
| XP_532290.2 | PREDICTED: similar to E3 ubiquitin protein ligase, HECT domain containing, 1 isoform 1                                                                                           |
| XP_532298.2 | PREDICTED: similar to mitochondrial folate transporter/carrier                                                                                                                   |
| XP_532301.1 | PREDICTED: similar to Dihydropyrimidinase (DHPase) (Hydantoinase) (DHP) isoform 1                                                                                                |
| XP_532310.2 | PREDICTED: hypothetical protein XP_532310                                                                                                                                        |
| XP_532315.1 | PREDICTED: similar to eukaryotic translation initiation factor 3, subunit 3 gamma, 40kDa isoform 1                                                                               |
| XP_532317.2 | PREDICTED: similar to NOV protein homolog precursor (NovH) (Nephroblastoma overexpressed gene protein homolog)                                                                   |
| XP_532319.2 | PREDICTED: similar to collagen, type XIV, alpha 1                                                                                                                                |
| XP_532332.1 | PREDICTED: similar to L-lactate dehydrogenase B chain (LDH-B) (LDH heart subunit) (LDH-H) isoform 1                                                                              |
| XP_532334.2 | PREDICTED: similar to potassium voltage-gated channel KQT-like protein 3                                                                                                         |
| XP_532338.2 | PREDICTED: similar to eukaryotic translation initiation factor 2C, 2                                                                                                             |
| XP_532341.2 | PREDICTED: hypothetical protein XP_532341                                                                                                                                        |
| XP_532346.2 | PREDICTED: similar to GDP-L-fucose synthetase (FX protein) (Red cell NADP(H)-binding protein) (GDP-4-keto-6-deoxy-D-mannose-3,5-epimerase-4-reductase)                           |
| XP_532347.2 | PREDICTED: similar to epiplakin 1                                                                                                                                                |
| XP_532352.2 | PREDICTED: similar to shank-interacting protein-like 1                                                                                                                           |
| XP_532354.2 | PREDICTED: similar to Heat shock factor protein 1 (HSF 1) (Heat shock transcription factor 1) (HSTF 1) isoform 1                                                                 |
| XP_532356.2 | PREDICTED: similar to cleavage and polyadenylation specific factor 1                                                                                                             |
| XP_532357.2 | PREDICTED: similar to I-kappa-B-related protein                                                                                                                                  |

|             |                                                                                                                                                                                                                                                                         |
|-------------|-------------------------------------------------------------------------------------------------------------------------------------------------------------------------------------------------------------------------------------------------------------------------|
| XP_532358.2 | PREDICTED: similar to kinesin family member C2                                                                                                                                                                                                                          |
| XP_532369.2 | PREDICTED: similar to CG32045-PC, isoform C                                                                                                                                                                                                                             |
| XP_532374.2 | PREDICTED: similar to Alpha platelet-derived growth factor receptor precursor (PDGF-R-alpha) (CD140a antigen)                                                                                                                                                           |
| XP_532388.2 | PREDICTED: similar to centromere protein C 1                                                                                                                                                                                                                            |
| XP_532402.2 | PREDICTED: similar to G-rich RNA sequence binding factor 1                                                                                                                                                                                                              |
| XP_532410.2 | PREDICTED: similar to Amphiregulin precursor (AR) (Colorectum cell-derived growth factor) (CRDGF)                                                                                                                                                                       |
| XP_532420.2 | PREDICTED: similar to muskelin 1, intracellular mediator containing kelch motifs                                                                                                                                                                                        |
| XP_532421.2 | PREDICTED: similar to Coatomer gamma-2 subunit (Gamma-2 coat protein) (Gamma-2 COP)                                                                                                                                                                                     |
| XP_532435.2 | PREDICTED: similar to RNA-binding protein 28 (RNA binding motif protein 28)                                                                                                                                                                                             |
| XP_532436.2 | PREDICTED: similar to Staphylococcal nuclease domain containing protein 1 (p100 co-activator) (100 kDa coactivator) (EBNA2 coactivator p100)                                                                                                                            |
| XP_532438.2 | PREDICTED: similar to ADP-ribosylation factor 5 isoform 1                                                                                                                                                                                                               |
| XP_532449.2 | PREDICTED: similar to cyclin D binding myb-like transcription factor 1 isoform 1                                                                                                                                                                                        |
| XP_532456.2 | PREDICTED: similar to A-kinase anchor protein 9 isoform 2                                                                                                                                                                                                               |
| XP_532460.2 | PREDICTED: similar to CG4996-PA                                                                                                                                                                                                                                         |
| XP_532465.2 | PREDICTED: similar to sarcoglycan, epsilon isoform 1                                                                                                                                                                                                                    |
| XP_532479.2 | PREDICTED: similar to Adseverin (Scinderin)                                                                                                                                                                                                                             |
| XP_532486.2 | PREDICTED: similar to Sorting nexin-13 (RGS domain- and PHOX domain-containing protein) (RGS-PX1)                                                                                                                                                                       |
| XP_532489.2 | PREDICTED: similar to down-regulated by Ctnnb1, a isoform 1                                                                                                                                                                                                             |
| XP_532491.2 | PREDICTED: similar to serine/threonine kinase 31 isoform a                                                                                                                                                                                                              |
| XP_532502.2 | PREDICTED: similar to Glycyl-tRNA synthetase (Glycine--tRNA ligase) (GlyRS)                                                                                                                                                                                             |
| XP_532503.2 | PREDICTED: similar to CG7332-PA                                                                                                                                                                                                                                         |
| XP_532516.2 | PREDICTED: similar to cell division cycle 10 isoform 1 isoform 1                                                                                                                                                                                                        |
| XP_532520.1 | PREDICTED: similar to eukaryotic translation elongation factor 1 alpha 1 isoform 1                                                                                                                                                                                      |
| XP_532534.2 | PREDICTED: similar to Ca2+-dependent activator for secretion protein 2                                                                                                                                                                                                  |
| XP_532540.2 | PREDICTED: similar to forkhead box J3 isoform 1                                                                                                                                                                                                                         |
| XP_532545.2 | PREDICTED: similar to Adenylyl cyclase-associated protein 1 (CAP 1) isoform 1                                                                                                                                                                                           |
| XP_532549.2 | PREDICTED: similar to microfilament and actin filament cross-linker protein isoform a isoform 1                                                                                                                                                                         |
| XP_532550.2 | PREDICTED: similar to NADH-ubiquinone oxidoreductase 15 kDa subunit (Complex I-15 kDa) (CI-15 kDa)                                                                                                                                                                      |
| XP_532553.2 | PREDICTED: similar to Splicing factor 3A subunit 3 (Spliceosome associated protein 61) (SAP 61) (SF3a60)                                                                                                                                                                |
| XP_532557.2 | PREDICTED: similar to Smad nuclear interacting protein                                                                                                                                                                                                                  |
| XP_532563.2 | PREDICTED: similar to eukaryotic translation initiation factor 2C, 1                                                                                                                                                                                                    |
| XP_532566.2 | PREDICTED: similar to Splicing factor, proline- and glutamine-rich (Polypyrimidine tract-binding protein-associated splicing factor) (PTB-associated splicing factor) (PSF) (DNA-binding p52/p100 complex, 100 kDa subunit) (100-kDa DNA-pairing protein) (hPOMp100)... |
| XP_532568.2 | PREDICTED: similar to Disks large-associated protein 3 (DAP-3) (SAP90/PSD-95-associated protein 3) (SAPAP3) (PSD-95/SAP90 binding protein 3)                                                                                                                            |
| XP_532569.2 | PREDICTED: similar to cardiac-MyBP-C associated Ca/CaM kinase                                                                                                                                                                                                           |
| XP_532570.2 | PREDICTED: similar to vacuolar protein sorting 35 isoform 1                                                                                                                                                                                                             |

|             |                                                                                                                                                                                                                                                                            |
|-------------|----------------------------------------------------------------------------------------------------------------------------------------------------------------------------------------------------------------------------------------------------------------------------|
| XP_532572.2 | PREDICTED: similar to glutathione peroxidase 7                                                                                                                                                                                                                             |
| XP_532575.2 | PREDICTED: similar to origin recognition complex, subunit 1                                                                                                                                                                                                                |
| XP_532576.2 | PREDICTED: similar to Zinc finger FYVE domain containing protein 9 (Mothers against decapentaplegic homolog interacting protein) (Madh-interacting protein) (Smad anchor for receptor activation) (Receptor activation anchor) (hSARA) (Novel serine protease) (NSP... iso |
| XP_532578.2 | PREDICTED: similar to nardilysin (N-arginine dibasic convertase) isoform 1                                                                                                                                                                                                 |
| XP_532580.2 | PREDICTED: similar to epidermal growth factor receptor pathway substrate 15                                                                                                                                                                                                |
| XP_532591.2 | PREDICTED: similar to Fatty-acid amide hydrolase (Oleamide hydrolase) (Anandamide amidohydrolase)                                                                                                                                                                          |
| XP_532599.2 | PREDICTED: similar to peroxiredoxin 1                                                                                                                                                                                                                                      |
| XP_532603.2 | PREDICTED: similar to Translation initiation factor eIF-2B gamma subunit (eIF-2B GDP-GTP exchange factor) isoform 1                                                                                                                                                        |
| XP_532609.2 | PREDICTED: similar to DNMT1 associated protein-1                                                                                                                                                                                                                           |
| XP_532613.2 | PREDICTED: similar to Receptor-type tyrosine-protein phosphatase F precursor (LAR protein) (Leukocyte antigen related) isoform 1                                                                                                                                           |
| XP_532614.2 | PREDICTED: similar to CG4329-PA, isoform A                                                                                                                                                                                                                                 |
| XP_532616.2 | PREDICTED: similar to Poly [ADP-ribose] polymerase-2 (PARP-2) (NAD(+) ADP-ribosyltransferase-2) (Poly[ADP-ribose] synthetase-2) (pADPRT-2) (hPARP-2)                                                                                                                       |
| XP_532617.2 | PREDICTED: similar to Purine nucleoside phosphorylase (Inosine phosphorylase) (PNP) isoform 1                                                                                                                                                                              |
| XP_532618.2 | PREDICTED: similar to Ribonuclease pancreatic precursor (RNase 1) (RNase A) (RNase Upl-1) (RIB-1) (HP-RNase)                                                                                                                                                               |
| XP_532621.2 | PREDICTED: similar to quattro                                                                                                                                                                                                                                              |
| XP_532624.2 | PREDICTED: similar to chromodomain helicase DNA binding protein 8 isoform 1                                                                                                                                                                                                |
| XP_532638.2 | PREDICTED: similar to PTPRF interacting protein alpha 2                                                                                                                                                                                                                    |
| XP_532640.2 | PREDICTED: similar to peptidylglycine alpha-amidating monooxygenase COOH-terminal interactor                                                                                                                                                                               |
| XP_532646.2 | PREDICTED: similar to WD repeat domain 51B                                                                                                                                                                                                                                 |
| XP_532649.2 | PREDICTED: similar to Early endosome antigen 1 (Endosome-associated protein p162) (Zinc finger FYVE domain containing protein 2)                                                                                                                                           |
| XP_532650.2 | PREDICTED: similar to nudix-type motif 4 isoform beta                                                                                                                                                                                                                      |
| XP_532655.2 | PREDICTED: similar to netrin 4                                                                                                                                                                                                                                             |
| XP_532660.2 | PREDICTED: similar to solute carrier family 25 member 3 isoform b precursor isoform 1                                                                                                                                                                                      |
| XP_532662.2 | PREDICTED: similar to CG31653-PA                                                                                                                                                                                                                                           |
| XP_532665.2 | PREDICTED: similar to Down-regulated in metastasis protein (Key-1A6 protein) (Novel nucleolar protein 73) (NNP73)                                                                                                                                                          |
| XP_532667.2 | PREDICTED: similar to CG8027-PA                                                                                                                                                                                                                                            |
| XP_532674.2 | PREDICTED: similar to Host cell factor 2 (HCF-2) (C2 factor) isoform 1                                                                                                                                                                                                     |
| XP_532678.1 | PREDICTED: similar to Anaphase promoting complex subunit 10 (APC10) (Cyclosome subunit 10)                                                                                                                                                                                 |
| XP_532684.2 | PREDICTED: similar to CG9882-PA                                                                                                                                                                                                                                            |
| XP_532689.2 | PREDICTED: similar to F-box protein FBW7 isoform 3 isoform 1                                                                                                                                                                                                               |
| XP_532697.2 | PREDICTED: similar to Fibrinogen alpha chain precursor                                                                                                                                                                                                                     |
| XP_532704.1 | PREDICTED: similar to peptidylprolyl isomerase D isoform 1                                                                                                                                                                                                                 |
| XP_532705.2 | PREDICTED: similar to CG3764-PA                                                                                                                                                                                                                                            |
| XP_532709.2 | PREDICTED: similar to CG10341-PA                                                                                                                                                                                                                                           |
| XP_532718.1 | PREDICTED: similar to Phosphoglycerate mutase 2 (Phosphoglycerate mutase isozyme M) (PGAM-M) (BPG-dependent PGAM 2) (Muscle-specific phosphoglycerate mutase)                                                                                                              |

isoform 1

|             |                                                                                                                                                                           |
|-------------|---------------------------------------------------------------------------------------------------------------------------------------------------------------------------|
| XP_532721.2 | PREDICTED: similar to transmembrane emp24 protein transport domain containing 4 isoform 1                                                                                 |
| XP_532722.2 | PREDICTED: similar to oxoglutarate (alpha-ketoglutarate) dehydrogenase (lipoamide) isoform 1 precursor                                                                    |
| XP_532728.2 | PREDICTED: similar to Nuclear pore complex protein Nup205 (Nucleoporin Nup205) (205 kDa nucleoporin)                                                                      |
| XP_532737.2 | PREDICTED: similar to thiamin pyrophosphokinase 1                                                                                                                         |
| XP_532740.2 | PREDICTED: similar to chloride channel, nucleotide-sensitive, 1A                                                                                                          |
| XP_532742.2 | PREDICTED: similar to Glutathione S-transferase kappa 1 (GST 13-13) (Glutathione S-transferase subunit 13) (GST class-kappa) (GSTK1-1) (hGSTK1)                           |
| XP_532746.2 | PREDICTED: similar to Maltase-glucoamylase, intestinal                                                                                                                    |
| XP_532750.2 | PREDICTED: similar to aarF domain containing kinase 2                                                                                                                     |
| XP_532760.2 | PREDICTED: similar to Cell division protein kinase 5 (Tau protein kinase II catalytic subunit) (TPKII catalytic subunit) (Serine/threonine-protein kinase PSSALRE) (CRK6) |
| XP_532761.2 | PREDICTED: similar to Anion exchange protein 2 (Non-erythroid band 3-like protein) (BND3L)                                                                                |
| XP_532769.2 | PREDICTED: similar to 5-AMP-activated protein kinase, gamma-2 subunit (AMPK gamma-2 chain) (AMPK gamma2) (H91620p)                                                        |
| XP_532787.2 | PREDICTED: similar to golgi-associated microtubule-binding protein HOOK3                                                                                                  |
| XP_532792.2 | PREDICTED: similar to putative lysophosphatidic acid acyltransferase                                                                                                      |
| XP_532797.2 | PREDICTED: similar to ADAM 32 precursor (A disintegrin and metalloprotease domain 32)                                                                                     |
| XP_532805.2 | PREDICTED: similar to DDHD domain containing 2                                                                                                                            |
| XP_532813.2 | PREDICTED: similar to Glutathione reductase, mitochondrial precursor (GR) (GRase)                                                                                         |
| XP_532819.2 | PREDICTED: similar to malignant fibrous histiocytoma amplified sequence 1                                                                                                 |
| XP_532820.2 | PREDICTED: similar to Low-density lipoprotein receptor-related protein 4 precursor (LDLR dan)                                                                             |
| XP_532835.2 | PREDICTED: similar to FAT tumor suppressor 1 precursor                                                                                                                    |
| XP_532839.2 | PREDICTED: hypothetical protein XP_532839                                                                                                                                 |
| XP_532844.2 | PREDICTED: similar to solute carrier family 25, member 4                                                                                                                  |
| XP_532849.2 | PREDICTED: similar to ectonucleotide pyrophosphatase/phosphodiesterase 6                                                                                                  |
| XP_532852.2 | PREDICTED: similar to Endonuclease VIII-like 3 (Nei-like 3) (DNA glycosylase FPG2)                                                                                        |
| XP_532856.2 | PREDICTED: similar to tumor suppressing subtransferable candidate 1                                                                                                       |
| XP_532865.2 | PREDICTED: similar to kinase D-interacting substance of 220 kDa isoform 1                                                                                                 |
| XP_532870.2 | PREDICTED: similar to a disintegrin and metalloproteinase domain 17 isoform 2 preproprotein                                                                               |
| XP_532876.2 | PREDICTED: similar to Protein disulfide-isomerase A6 precursor (Thioredoxin domain containing protein 7)                                                                  |
| XP_532879.2 | PREDICTED: similar to DEAD (Asp-Glu-Ala-Asp) box polypeptide 1 isoform 1                                                                                                  |
| XP_532887.2 | PREDICTED: similar to Apolipoprotein B-100 precursor (Apo B-100)                                                                                                          |
| XP_532894.1 | PREDICTED: similar to hydroxyacyl dehydrogenase, subunit A isoform 2                                                                                                      |
| XP_532897.2 | PREDICTED: similar to CG10958-PA                                                                                                                                          |
| XP_532903.2 | PREDICTED: similar to EMILIN 1 precursor (Elastin microfibril interface-located protein 1) (Elastin microfibril interfacer 1)                                             |
| XP_532906.2 | PREDICTED: similar to apoptosis related protein 3 isoform b                                                                                                               |
| XP_532909.2 | PREDICTED: similar to eukaryotic translation initiation factor 2B, subunit 4 delta long isoform isoform 1                                                                 |
| XP_532922.2 | PREDICTED: similar to 3-oxo-5 alpha-steroid 4-dehydrogenase 2                                                                                                             |



|             |                                                                                                                                                                      |
|-------------|----------------------------------------------------------------------------------------------------------------------------------------------------------------------|
| XP_532927.2 | PREDICTED: similar to CG5290-PA                                                                                                                                      |
| XP_532928.2 | PREDICTED: similar to latent transforming growth factor beta binding protein 1 isoform LTBP-1S isoform 1                                                             |
| XP_532959.2 | PREDICTED: similar to Zinc finger CCCH-type domain containing protein 6                                                                                              |
| XP_532961.2 | PREDICTED: hypothetical protein XP_532961                                                                                                                            |
| XP_532963.2 | PREDICTED: similar to ribose 5-phosphate isomerase A (ribose 5-phosphate epimerase), partial                                                                         |
| XP_532972.2 | PREDICTED: similar to vacuolar protein sorting 24 isoform 1 isoform 1                                                                                                |
| XP_532976.2 | PREDICTED: similar to DNA-directed RNA polymerase I largest subunit (RNA polymerase I 194 kDa subunit) (RPA194)                                                      |
| XP_532984.2 | PREDICTED: similar to CG7092-PA                                                                                                                                      |
| XP_532985.2 | PREDICTED: similar to succinate-CoA ligase, GDP-forming, alpha subunit                                                                                               |
| XP_532991.2 | PREDICTED: similar to hexokinase 2                                                                                                                                   |
| XP_533005.2 | PREDICTED: similar to ALMS1                                                                                                                                          |
| XP_533013.2 | PREDICTED: similar to Transcription intermediary factor 1-gamma (TIF1-gamma) (RET-fused gene 7 protein) (Rfg7 protein) (Tripartite motif protein 33)                 |
| XP_533016.1 | PREDICTED: similar to Cold shock domain protein E1 (UNR protein) (N-ras upstream gene protein) isoform 5                                                             |
| XP_533020.2 | PREDICTED: similar to tripartite motif-containing 45                                                                                                                 |
| XP_533034.1 | PREDICTED: similar to Peroxisomal membrane protein 11B (Peroxin-11B) (Peroxisomal biogenesis factor 11B) (PEX11beta) (Pex11pbeta) isoform 1                          |
| XP_533038.2 | PREDICTED: similar to hemojuvelin isoform a isoform 1                                                                                                                |
| XP_533039.2 | PREDICTED: similar to phosphodiesterase 4D interacting protein isoform 1                                                                                             |
| XP_533041.1 | PREDICTED: similar to bola-like 1 isoform 1                                                                                                                          |
| XP_533056.2 | PREDICTED: similar to selenium binding protein 1                                                                                                                     |
| XP_533065.2 | PREDICTED: similar to Monocarboxylate transporter 1 (MCT 1) isoform 1                                                                                                |
| XP_533068.2 | PREDICTED: similar to DEAD (Asp-Glu-Ala-Asp) box polypeptide 20                                                                                                      |
| XP_533073.2 | PREDICTED: similar to Epidermal growth factor receptor precursor (Receptor tyrosine-protein kinase ErbB-1)                                                           |
| XP_533078.2 | PREDICTED: similar to Proteasome subunit alpha type 2 (Proteasome component C3) (Macropain subunit C3) (Multicatalytic endopeptidase complex subunit C3) isoform 1   |
| XP_533082.2 | PREDICTED: similar to Cell division cycle 2-like protein kinase 5 (CDC2-related protein kinase 5) (Cholinesterase-related cell division controller)                  |
| XP_533084.2 | PREDICTED: similar to Vacuolar assembly protein VPS41 homolog (S53)                                                                                                  |
| XP_533095.2 | PREDICTED: similar to cAMP-dependent protein kinase type II-beta regulatory subunit isoform 1                                                                        |
| XP_533096.2 | PREDICTED: similar to synaptophysin-like 1 isoform b                                                                                                                 |
| XP_533098.2 | PREDICTED: similar to CG17941-PA                                                                                                                                     |
| XP_533102.2 | PREDICTED: similar to myeloid/lymphoid or mixed-lineage leukemia 5 isoform 1                                                                                         |
| XP_533103.2 | PREDICTED: similar to proteasome (prosome, macropain) 26S subunit, ATPase 2                                                                                          |
| XP_533111.2 | PREDICTED: similar to Atrophin-1 interacting protein 1 (Membrane associated guanylate kinase inverted-2) (MAGI-2) (Activin receptor interacting protein 1) (Acvrip1) |
| XP_533115.2 | PREDICTED: similar to tweety 2 isoform 1                                                                                                                             |
| XP_533125.2 | PREDICTED: similar to CG5700-PB                                                                                                                                      |
| XP_533129.2 | PREDICTED: similar to dynein, axonemal, heavy polypeptide 9 isoform 2                                                                                                |
| XP_533130.2 | PREDICTED: similar to DEAD (Asp-Glu-Ala-Asp) box polypeptide 48 isoform 1                                                                                            |
| XP_533134.2 | PREDICTED: similar to alveolar soft part sarcoma chromosome region, candidate 1 long isoform isoform 1                                                               |

|             |                                                                                                                                                                                                                                                                        |
|-------------|------------------------------------------------------------------------------------------------------------------------------------------------------------------------------------------------------------------------------------------------------------------------|
| XP_533160.1 | PREDICTED: similar to B5 receptor                                                                                                                                                                                                                                      |
| XP_533162.2 | PREDICTED: similar to Reticulocalbin 1 precursor                                                                                                                                                                                                                       |
| XP_533167.2 | PREDICTED: similar to FLJ46154 protein                                                                                                                                                                                                                                 |
| XP_533169.1 | PREDICTED: similar to macrophage expressed gene 1                                                                                                                                                                                                                      |
| XP_533171.2 | PREDICTED: similar to zinc finger protein 91 isoform 1 isoform 1                                                                                                                                                                                                       |
| XP_533200.2 | PREDICTED: similar to Adapter-related protein complex 2 alpha 2 subunit (Alpha-adaptin C) (Adaptor protein complex AP-2 alpha-2 subunit) (Clathrin assembly protein complex 2 alpha-C large chain) (100 kDa coated vesicle protein C) (Plasma membrane adaptor HA2/... |
| XP_533207.1 | PREDICTED: similar to mitochondrial ribosomal protein L21 isoform d                                                                                                                                                                                                    |
| XP_533208.2 | PREDICTED: similar to Carnitine O-palmitoyltransferase I, mitochondrial liver isoform (CPT I) (CPTI-L) (Carnitine palmitoyltransferase 1A)                                                                                                                             |
| XP_533215.2 | PREDICTED: similar to coronin, actin binding protein, 1B isoform 1                                                                                                                                                                                                     |
| XP_533217.2 | PREDICTED: similar to RNA binding motif protein 14                                                                                                                                                                                                                     |
| XP_533219.2 | PREDICTED: similar to Cathepsin F precursor (CATSF)                                                                                                                                                                                                                    |
| XP_533220.2 | PREDICTED: similar to dipeptidylpeptidase III isoform 1 isoform 1                                                                                                                                                                                                      |
| XP_533222.2 | PREDICTED: similar to N-acetyllactosaminide beta-1,3-N-acetylglucosaminyltransferase (Poly-N-acetyllactosamine extension enzyme) (I-beta-1,3-N-acetylglucosaminyltransferase) (iGnT) (UDP-GlcNAc:betaGal beta-1,3-N-acetylglucosaminyltransferase 6)...                |
| XP_533229.2 | PREDICTED: similar to EGF-containing fibulin-like extracellular matrix protein 2 precursor (Fibulin-4) (FIBL-4) (UPH1 protein)                                                                                                                                         |
| XP_533230.2 | PREDICTED: similar to MUS81 endonuclease homolog isoform 1                                                                                                                                                                                                             |
| XP_533231.1 | PREDICTED: similar to Cofilin-1 (Cofilin, non-muscle isoform) (18 kDa phosphoprotein) (p18) isoform 1                                                                                                                                                                  |
| XP_533234.2 | PREDICTED: similar to polymerase (DNA directed), alpha 2 (70kD subunit)                                                                                                                                                                                                |
| XP_533248.2 | PREDICTED: similar to Ubiquitin thiolesterase protein OTUB1 (Otubain 1) (OTU domain-containing ubiquitin aldehyde-binding protein 1) (Ubiquitin-specific processing protease OTUB1) (Deubiquitinating enzyme OTUB1)                                                    |
| XP_533252.2 | PREDICTED: similar to atlastin-like                                                                                                                                                                                                                                    |
| XP_533259.2 | PREDICTED: similar to TAF6-like RNA polymerase II p300/CBP-associated factor-associated factor 65 kDa subunit 6L (PCAF-associated factor 65 alpha) (PAF65-alpha) isoform 1                                                                                             |
| XP_533261.2 | PREDICTED: similar to heterogeneous nuclear ribonucleoprotein U                                                                                                                                                                                                        |
| XP_533263.2 | PREDICTED: similar to DNA segment, Chr 19, ERATO Doi 721, expressed                                                                                                                                                                                                    |
| XP_533265.2 | PREDICTED: similar to Metastasis-associated protein MTA2 (Metastasis-associated 1-like 1)                                                                                                                                                                              |
| XP_533275.2 | PREDICTED: similar to DNA damage binding protein 1 (Damage-specific DNA binding protein 1) (DDB p127 subunit) (DDBa) (UV-damaged DNA-binding protein 1) (UV-DDB 1) (Xeroderma pigmentosum group E complementing protein) (XPce) (X-associated protein 1) (XAP-1)...    |
| XP_533280.2 | PREDICTED: similar to inositol polyphosphate-4-phosphatase, type II, 105kD                                                                                                                                                                                             |
| XP_533285.2 | PREDICTED: similar to Calmegin precursor                                                                                                                                                                                                                               |
| XP_533286.2 | PREDICTED: similar to Microsomal glutathione S-transferase 2 (Microsomal GST-2) (Microsomal GST-II)                                                                                                                                                                    |
| XP_533295.2 | PREDICTED: similar to Serine/threonine-protein kinase PLK4 (Polo-like kinase 4) (PLK-4) (Serine/threonine-protein kinase Sak) (Serine/threonine-protein kinase 18) isoform 1                                                                                           |
| XP_533297.2 | PREDICTED: similar to Heat shock 70 kDa protein 4L (Osmotic stress protein 94) (Heat shock 70-related protein APG-1) isoform 1                                                                                                                                         |
| XP_533303.1 | PREDICTED: similar to Annexin A5 (Annexin V) (Lipocortin V) (Endonexin II) (Calphobindin I) (CBP-I) (Placental anticoagulant protein I) (PAP-I) (PP4) (Thromboplastin inhibitor) (Vascular anticoagulant-alpha) (VAC-alpha) (Anchorin CII)                             |
| XP_533310.2 | PREDICTED: similar to UDP-glucose ceramide glucosyltransferase-like 1 isoform 1                                                                                                                                                                                        |
| XP_533314.2 | PREDICTED: similar to TFIIH basal transcription factor complex helicase XPB subunit (Basic transcription factor 2 89 kDa subunit) (BTF2-p89) (TFIIH 89 kDa subunit) (DNA-                                                                                              |

|             |                                                                                                                                                                                                    |
|-------------|----------------------------------------------------------------------------------------------------------------------------------------------------------------------------------------------------|
|             | repair protein complementing XP-B cells) (Xeroderma pigmentosum group B complementing prot...                                                                                                      |
| XP_533324.2 | PREDICTED: similar to Macrophage receptor MARCO (Macrophage receptor with collagenous structure)                                                                                                   |
| XP_533326.2 | PREDICTED: similar to CG7773-PA                                                                                                                                                                    |
| XP_533341.1 | PREDICTED: similar to CG9924-PC, isoform C isoform 1                                                                                                                                               |
| XP_533342.2 | PREDICTED: similar to neurexophilin 2                                                                                                                                                              |
| XP_533343.2 | PREDICTED: similar to Low-density lipoprotein receptor-related protein 1B precursor (Low-density lipoprotein receptor-related protein-deleted in tumor) (LRP-DIT)                                  |
| XP_533346.2 | PREDICTED: similar to long interspersed repetitive DNA sequence LINE4 (L1Rn)                                                                                                                       |
| XP_533355.2 | PREDICTED: similar to RAP1 interacting factor 1                                                                                                                                                    |
| XP_533356.2 | PREDICTED: similar to Nebulin                                                                                                                                                                      |
| XP_533360.2 | PREDICTED: similar to Ectonucleotide pyrophosphatase/phosphodiesterase 1 (E-NPP 1) (Phosphodiesterase I/nucleotide pyrophosphatase 1) (Plasma-cell membrane glycoprotein PC-1)                     |
| XP_533364.2 | PREDICTED: similar to PQ loop repeat containing 1 (predicted)                                                                                                                                      |
| XP_533365.2 | PREDICTED: similar to RNA polymerase II subunit A C-terminal domain phosphatase (TFIIF-associating CTD phosphatase) isoform 1                                                                      |
| XP_533367.2 | PREDICTED: similar to Myelin basic protein (MBP) (Myelin A1 protein) (Myelin membrane encephalitogenic protein) isoform 1                                                                          |
| XP_533368.2 | PREDICTED: similar to serologically defined colon cancer antigen 33                                                                                                                                |
| XP_533370.2 | PREDICTED: similar to Zinc finger protein 407                                                                                                                                                      |
| XP_533372.2 | PREDICTED: similar to Cytosolic nonspecific dipeptidase (Glutamate carboxypeptidase-like protein 1) (CNDP dipeptidase 2) isoform 1                                                                 |
| XP_533379.2 | PREDICTED: similar to docking protein 5-like                                                                                                                                                       |
| XP_533381.2 | PREDICTED: similar to thioredoxin domain containing 10                                                                                                                                             |
| XP_533384.2 | PREDICTED: similar to PH domain leucine-rich repeat protein phosphatase (Pleckstrin homology domain containing family E protein 1) (Suprachiasmatic nucleus circadian oscillatory protein) (hSCOP) |
| XP_533387.2 | PREDICTED: similar to phosphatidylinositol glycan, class N                                                                                                                                         |
| XP_533390.2 | PREDICTED: similar to ERGIC-53 protein precursor (ER-Golgi intermediate compartment 53 kDa protein) (Lectin, mannose-binding 1) (Gp58) (Intracellular mannose specific lectin MR60)                |
| XP_533391.2 | PREDICTED: similar to zinc finger protein 532                                                                                                                                                      |
| XP_533394.2 | PREDICTED: similar to ATPase, Class I, type 8B, member 1                                                                                                                                           |
| XP_533395.2 | PREDICTED: similar to WD repeat domain 7 protein isoform 1 isoform 1                                                                                                                               |
| XP_533396.2 | PREDICTED: hypothetical protein XP_533396                                                                                                                                                          |
| XP_533403.2 | PREDICTED: similar to LINE-1 reverse transcriptase homolog                                                                                                                                         |
| XP_533404.2 | PREDICTED: similar to RNA (guanine-7-) methyltransferase                                                                                                                                           |
| XP_533406.2 | PREDICTED: similar to connective tissue growth factor                                                                                                                                              |
| XP_533416.2 | PREDICTED: similar to HBS1-like isoform 1                                                                                                                                                          |
| XP_533417.2 | PREDICTED: similar to joubertin                                                                                                                                                                    |
| XP_533418.1 | PREDICTED: similar to L-lactate dehydrogenase B chain (LDH-B) (LDH heart subunit) (LDH-H) isoform 1                                                                                                |
| XP_533420.2 | PREDICTED: similar to mitogen-activated protein kinase kinase kinase 5                                                                                                                             |
| XP_533422.2 | PREDICTED: similar to 60S ribosomal protein L29 (Cell surface heparin binding protein HIP)                                                                                                         |
| XP_533424.2 | PREDICTED: similar to NHS-like 1                                                                                                                                                                   |

|             |                                                                                                                                                                                                                                         |
|-------------|-----------------------------------------------------------------------------------------------------------------------------------------------------------------------------------------------------------------------------------------|
| XP_533429.2 | PREDICTED: similar to Beta-taxilin (Muscle derived protein 77) (hMDP77)                                                                                                                                                                 |
| XP_533434.2 | PREDICTED: similar to Phosphatase and actin regulator 2                                                                                                                                                                                 |
| XP_533438.2 | PREDICTED: similar to SNF2 histone linker PHD RING helicase isoform 1                                                                                                                                                                   |
| XP_533439.2 | PREDICTED: similar to Ras-related protein Rab-32                                                                                                                                                                                        |
| XP_533442.2 | PREDICTED: similar to tomosyn isoform b                                                                                                                                                                                                 |
| XP_533460.1 | PREDICTED: similar to Sorting nexin-9                                                                                                                                                                                                   |
| XP_533463.2 | PREDICTED: similar to Superoxide dismutase [Mn], mitochondrial precursor isoform 1                                                                                                                                                      |
| XP_533468.2 | PREDICTED: similar to Plasminogen precursor                                                                                                                                                                                             |
| XP_533478.2 | PREDICTED: similar to CG7386-PA isoform 1                                                                                                                                                                                               |
| XP_533495.2 | PREDICTED: similar to Receptor-type tyrosine-protein phosphatase kappa precursor (Protein-tyrosine phosphatase kappa) (R-PTP-kappa)                                                                                                     |
| XP_533497.2 | PREDICTED: similar to Rho GTPase activating protein 18                                                                                                                                                                                  |
| XP_533502.2 | PREDICTED: similar to RAD26L hypothetical protein                                                                                                                                                                                       |
| XP_533506.2 | PREDICTED: similar to golgi phosphoprotein 2                                                                                                                                                                                            |
| XP_533516.2 | PREDICTED: similar to transducin-like enhancer protein 1                                                                                                                                                                                |
| XP_533520.2 | PREDICTED: similar to phosphoserine aminotransferase isoform 1                                                                                                                                                                          |
| XP_533522.2 | PREDICTED: similar to vacuolar protein sorting 13A isoform A                                                                                                                                                                            |
| XP_533523.2 | PREDICTED: similar to CG11596-PA, isoform A                                                                                                                                                                                             |
| XP_533524.2 | PREDICTED: similar to Annexin A1 (Annexin I) (Lipocortin I) (Calpactin II) (Chromobindin 9) (P35) (Phospholipase A2 inhibitory protein)                                                                                                 |
| XP_533529.2 | PREDICTED: similar to SMC5 protein isoform 1                                                                                                                                                                                            |
| XP_533533.2 | PREDICTED: similar to phosphatidylinositol-4-phosphate 5-kinase, type I, beta isoform 2                                                                                                                                                 |
| XP_533534.2 | PREDICTED: similar to phosphoglucomutase 5                                                                                                                                                                                              |
| XP_533535.2 | PREDICTED: similar to dedicator of cytokinesis 8 isoform 1                                                                                                                                                                              |
| XP_533538.2 | PREDICTED: similar to Very low-density lipoprotein receptor precursor (VLDL receptor) isoform 1                                                                                                                                         |
| XP_533539.2 | PREDICTED: similar to D19Bwg1357e protein                                                                                                                                                                                               |
| XP_533544.2 | PREDICTED: similar to Insulin-like peptide INSL6 precursor (Insulin-like peptide 6) (Relaxin/insulin-like factor 1)                                                                                                                     |
| XP_533548.2 | PREDICTED: similar to nuclear factor, interleukin 3 regulated                                                                                                                                                                           |
| XP_533558.2 | PREDICTED: similar to protein tyrosine phosphatase domain containing 1 protein isoform 1                                                                                                                                                |
| XP_533560.1 | PREDICTED: similar to RIKEN cDNA 1110007C09                                                                                                                                                                                             |
| XP_533567.2 | PREDICTED: similar to Transcription intermediary factor 1-beta (TIF1-beta) (Tripartite motif protein 28) (Nuclear corepressor KAP-1) (KRAB-associated protein 1) (KAP-1) (KRAB-interacting protein 1) (KRIP-1) (RING finger protein 96) |
| XP_533569.2 | PREDICTED: similar to zinc finger protein 274 isoform c                                                                                                                                                                                 |
| XP_533574.2 | PREDICTED: similar to paternally expressed 3                                                                                                                                                                                            |
| XP_533576.2 | PREDICTED: similar to NACHT, LRR and PYD containing protein 5                                                                                                                                                                           |
| XP_533579.2 | PREDICTED: hypothetical protein XP_533579                                                                                                                                                                                               |
| XP_533584.1 | PREDICTED: similar to hsp70-interacting protein                                                                                                                                                                                         |
| XP_533588.2 | PREDICTED: similar to leukocyte receptor cluster (LRC) member 8                                                                                                                                                                         |

|             |                                                                                                                                                                                                             |
|-------------|-------------------------------------------------------------------------------------------------------------------------------------------------------------------------------------------------------------|
| XP_533603.2 | PREDICTED: similar to electron-transfer-flavoprotein, beta polypeptide isoform 1 isoform 1                                                                                                                  |
| XP_533608.2 | PREDICTED: similar to myosin binding protein C, fast-type isoform 1                                                                                                                                         |
| XP_533616.2 | PREDICTED: similar to Interferon regulatory factor 3 (IRF-3)                                                                                                                                                |
| XP_533617.1 | PREDICTED: similar to Ras-related protein R-Ras (p23)                                                                                                                                                       |
| XP_533622.2 | PREDICTED: similar to solute carrier family 6, member 20 isoform 2                                                                                                                                          |
| XP_533623.2 | PREDICTED: similar to lin-7 homolog B isoform 1                                                                                                                                                             |
| XP_533628.2 | PREDICTED: similar to Netrin-1 precursor                                                                                                                                                                    |
| XP_533637.2 | PREDICTED: hypothetical protein XP_533637                                                                                                                                                                   |
| XP_533638.2 | PREDICTED: similar to Symplekin                                                                                                                                                                             |
| XP_533640.2 | PREDICTED: similar to Echinoderm microtubule-associated protein-like 2 (EMAP-2) (HuEMAP-2) isoform 1                                                                                                        |
| XP_533641.2 | PREDICTED: similar to Creatine kinase M-type (Creatine kinase, M chain) (M-CK)                                                                                                                              |
| XP_533645.2 | PREDICTED: similar to Poliovirus receptor precursor (CD155 antigen)                                                                                                                                         |
| XP_533650.2 | PREDICTED: hypothetical protein XP_533650                                                                                                                                                                   |
| XP_533664.2 | PREDICTED: similar to latent transforming growth factor beta binding protein 4                                                                                                                              |
| XP_533666.2 | PREDICTED: similar to Flavin reductase (FR) (NADPH-dependent diaphorase) (NADPH-flavin reductase) (FLR) (Biliverdin reductase B) (BVR-B) (Biliverdin-IX beta-reductase) (Green heme binding protein) (GHBP) |
| XP_533671.2 | PREDICTED: similar to fibrillarin                                                                                                                                                                           |
| XP_533672.2 | PREDICTED: similar to translocase of inner mitochondrial membrane 50 homolog                                                                                                                                |
| XP_533674.2 | PREDICTED: similar to 40S ribosomal protein S16                                                                                                                                                             |
| XP_533678.1 | PREDICTED: similar to peroxisomal enoyl-coenzyme A hydratase-like protein isoform 1                                                                                                                         |
| XP_533688.2 | PREDICTED: similar to Amyloid-like protein 1 precursor (APLP) (APLP-1)                                                                                                                                      |
| XP_533694.2 | PREDICTED: similar to dermokine                                                                                                                                                                             |
| XP_533700.2 | PREDICTED: similar to Glucose-6-phosphate isomerase (GPI) (Phosphoglucose isomerase) (PGI) (Phosphohexose isomerase) (PHI) (Neuroleukin) (NLK) (Sperm antigen-36) (SA-36)                                   |
| XP_533706.2 | PREDICTED: similar to citron                                                                                                                                                                                |
| XP_533709.2 | PREDICTED: similar to RPB5-mediating protein isoform a                                                                                                                                                      |
| XP_533718.2 | PREDICTED: similar to RuvB-like protein 1 isoform 1                                                                                                                                                         |
| XP_533723.2 | PREDICTED: similar to coatomer protein complex, subunit gamma 1                                                                                                                                             |
| XP_533727.2 | PREDICTED: similar to xeroderma pigmentosum, complementation group C                                                                                                                                        |
| XP_533732.2 | PREDICTED: similar to plexin D1                                                                                                                                                                             |
| XP_533742.2 | PREDICTED: similar to Plasma membrane calcium-transporting ATPase 2 (PMCA2) (Plasma membrane calcium pump isoform 2) (Plasma membrane calcium ATPase isoform 2) isoform 1                                   |
| XP_533745.2 | PREDICTED: similar to interleukin 17 receptor E isoform 1                                                                                                                                                   |
| XP_533749.2 | PREDICTED: similar to myeloid/lymphoid or mixed-lineage leukemia 5 isoform 1                                                                                                                                |
| XP_533752.1 | PREDICTED: similar to eukaryotic translation elongation factor 1 alpha 2 isoform 1                                                                                                                          |
| XP_533753.2 | PREDICTED: similar to ER degradation-enhancing alpha-mannosidase-like                                                                                                                                       |
| XP_533760.2 | PREDICTED: similar to cell adhesion molecule with homology to L1CAM precursor                                                                                                                               |

|             |                                                                                                                                                                                                                                                                        |
|-------------|------------------------------------------------------------------------------------------------------------------------------------------------------------------------------------------------------------------------------------------------------------------------|
| XP_533763.2 | PREDICTED: similar to SHQ1 homolog isoform 1                                                                                                                                                                                                                           |
| XP_533770.2 | PREDICTED: similar to Membrane associated guanylate kinase, WW and PDZ domain containing protein 1 (BAI1-associated protein 1) (BAP-1) (Membrane associated guanylate kinase inverted-1) (MAGI-1) (Atrophin-1 interacting protein 3) (AIP3) (WW domain-containing p... |
| XP_533781.2 | PREDICTED: similar to sarcolemma associated protein isoform 1                                                                                                                                                                                                          |
| XP_533789.2 | PREDICTED: similar to calcium channel, voltage-dependent, alpha 2/delta 3 subunit                                                                                                                                                                                      |
| XP_533792.2 | PREDICTED: similar to Transketolase (TK)                                                                                                                                                                                                                               |
| XP_533795.2 | PREDICTED: similar to Serine/threonine-protein kinase Nek4 (NimA-related protein kinase 4) (Serine/threonine-protein kinase 2) (Serine/threonine-protein kinase NRK2)                                                                                                  |
| XP_533802.2 | PREDICTED: similar to dynein, axonemal, heavy polypeptide 1                                                                                                                                                                                                            |
| XP_533805.2 | PREDICTED: similar to 60S ribosomal protein L29 (Cell surface heparin binding protein HIP)                                                                                                                                                                             |
| XP_533806.2 | PREDICTED: similar to aminoacylase 1                                                                                                                                                                                                                                   |
| XP_533810.2 | PREDICTED: similar to Testis expressed sequence 264 protein precursor (Secreted protein ZSIG11)                                                                                                                                                                        |
| XP_533818.1 | PREDICTED: similar to Zinc finger MYND domain containing protein 10 (BLu protein) isoform 1                                                                                                                                                                            |
| XP_533823.2 | PREDICTED: similar to macrophage stimulating 1 receptor (c-met-related tyrosine kinase)                                                                                                                                                                                |
| XP_533824.2 | PREDICTED: similar to Actin-5C                                                                                                                                                                                                                                         |
| XP_533831.2 | PREDICTED: similar to Laminin beta-2 chain precursor (S-laminin) (Laminin B1s chain)                                                                                                                                                                                   |
| XP_533840.2 | PREDICTED: similar to cadherin EGF LAG seven-pass G-type receptor 3                                                                                                                                                                                                    |
| XP_533841.2 | PREDICTED: similar to plexin B1                                                                                                                                                                                                                                        |
| XP_533843.2 | PREDICTED: similar to nucleoside diphosphate kinase type 6<br>PREDICTED: similar to SWI/SNF-related matrix-associated actin-dependent regulator of chromatin subfamily C member 1 (SWI/SNF complex 155 kDa subunit) (BRG1-associated factor 155)                       |
| XP_533845.2 |                                                                                                                                                                                                                                                                        |
| XP_533847.2 | PREDICTED: similar to kinesin family member 9 isoform 2 isoform 1                                                                                                                                                                                                      |
| XP_533851.2 | PREDICTED: similar to testes-specific protease 50                                                                                                                                                                                                                      |
| XP_533853.2 | PREDICTED: similar to FYVE and coiled-coil domain containing 1                                                                                                                                                                                                         |
| XP_533868.2 | PREDICTED: similar to regulator of nonsense transcripts 1                                                                                                                                                                                                              |
| XP_533872.2 | PREDICTED: similar to myo-inositol 1-phosphate synthase A1                                                                                                                                                                                                             |
| XP_533875.2 | PREDICTED: similar to microtubule associated serine/threonine kinase 2                                                                                                                                                                                                 |
| XP_533888.2 | PREDICTED: similar to widely-interspaced zinc finger motifs isoform 2                                                                                                                                                                                                  |
| XP_533890.2 | PREDICTED: similar to ilvB (bacterial acetolactate synthase)-like isoform 1                                                                                                                                                                                            |
| XP_533898.2 | PREDICTED: similar to growth arrest and DNA-damage-inducible, gamma interacting protein 1                                                                                                                                                                              |
| XP_533906.2 | PREDICTED: similar to F-box/WD-repeat protein 9 (F-box and WD-40 domain protein 9)                                                                                                                                                                                     |
| XP_533910.2 | PREDICTED: similar to tartrate resistant acid phosphatase 5 precursor                                                                                                                                                                                                  |
| XP_533912.2 | PREDICTED: similar to CG32512-PA                                                                                                                                                                                                                                       |
| XP_533917.2 | PREDICTED: similar to kelch-like ECH-associated protein 1 isoform 1                                                                                                                                                                                                    |
| XP_533918.2 | PREDICTED: similar to Non-receptor tyrosine-protein kinase TYK2                                                                                                                                                                                                        |
| XP_533920.2 | PREDICTED: similar to Suppressor of SWI4 1 homolog (Ssf-1) (Peter Pan homolog)                                                                                                                                                                                         |
| XP_533922.2 | PREDICTED: hypothetical protein XP_533922                                                                                                                                                                                                                              |

|             |                                                                                                                                                                                                                                                                                                                                 |
|-------------|---------------------------------------------------------------------------------------------------------------------------------------------------------------------------------------------------------------------------------------------------------------------------------------------------------------------------------|
| XP_533927.2 | PREDICTED: similar to Variable ABnormal morphology family member (vab-19) isoform 1                                                                                                                                                                                                                                             |
| XP_533931.2 | PREDICTED: similar to G protein-coupled receptor 108                                                                                                                                                                                                                                                                            |
| XP_533932.2 | PREDICTED: similar to Complement C3 precursor                                                                                                                                                                                                                                                                                   |
| XP_533933.2 | PREDICTED: similar to tumor necrosis factor (ligand) superfamily, member 9                                                                                                                                                                                                                                                      |
| XP_533934.2 | PREDICTED: similar to tubulin, beta 4                                                                                                                                                                                                                                                                                           |
| XP_533945.2 | PREDICTED: similar to Scaffold attachment factor B2 isoform 1                                                                                                                                                                                                                                                                   |
| XP_533950.2 | PREDICTED: similar to Death-associated protein kinase 3 (DAP kinase 3) (DAP-like kinase) (Dlk) (ZIP-kinase)                                                                                                                                                                                                                     |
| XP_533954.2 | PREDICTED: similar to Thimet oligopeptidase (Endopeptidase 24.15) (MP78)                                                                                                                                                                                                                                                        |
| XP_533958.2 | PREDICTED: similar to transcription elongation factor B polypeptide 3 binding protein 1                                                                                                                                                                                                                                         |
| XP_533960.2 | PREDICTED: similar to NADH-ubiquinone oxidoreductase Fe-S protein 7                                                                                                                                                                                                                                                             |
| XP_533964.2 | PREDICTED: similar to basigin isoform 1                                                                                                                                                                                                                                                                                         |
| XP_533973.2 | PREDICTED: similar to expressed in non-metastatic cells 1, protein (NM23A) (nucleoside diphosphate kinase)                                                                                                                                                                                                                      |
| XP_533975.2 | PREDICTED: similar to cofactor required for Sp1 transcriptional activation, subunit 6, 77kDa                                                                                                                                                                                                                                    |
| XP_533992.2 | PREDICTED: similar to Pre-mRNA cleavage complex II protein Pcf11                                                                                                                                                                                                                                                                |
| XP_534002.2 | PREDICTED: similar to remodeling and spacing factor 1 isoform 1                                                                                                                                                                                                                                                                 |
| XP_534005.2 | PREDICTED: similar to EMSY protein isoform 3                                                                                                                                                                                                                                                                                    |
| XP_534007.2 | PREDICTED: similar to microtubule-associated protein 6 isoform 1                                                                                                                                                                                                                                                                |
| XP_534010.2 | PREDICTED: similar to DNA polymerase delta subunit 3 (DNA polymerase delta subunit p66) isoform 1                                                                                                                                                                                                                               |
| XP_534012.2 | PREDICTED: similar to CG32425-PA, isoform A                                                                                                                                                                                                                                                                                     |
| XP_534014.1 | PREDICTED: similar to proteasomal ATPase-associated factor 1                                                                                                                                                                                                                                                                    |
| XP_534016.2 | PREDICTED: similar to mitochondrial ribosomal protein L48 isoform 1                                                                                                                                                                                                                                                             |
| XP_534024.2 | PREDICTED: similar to Short transient receptor potential channel 2 (TrpC2) (mTrp2)                                                                                                                                                                                                                                              |
| XP_534033.2 | PREDICTED: hypothetical protein XP_534033                                                                                                                                                                                                                                                                                       |
| XP_534037.2 | PREDICTED: similar to Amyloid beta A4 precursor protein-binding family B member 1 (Fe65 protein)                                                                                                                                                                                                                                |
| XP_534039.2 | PREDICTED: similar to T07A9.8                                                                                                                                                                                                                                                                                                   |
| XP_534045.2 | PREDICTED: similar to serine/threonine kinase 33                                                                                                                                                                                                                                                                                |
| XP_534048.2 | PREDICTED: similar to RAB6 interacting protein 1                                                                                                                                                                                                                                                                                |
| XP_534051.2 | PREDICTED: similar to Wee1-like protein kinase (WEE1hu)                                                                                                                                                                                                                                                                         |
| XP_534062.2 | PREDICTED: similar to Alpha-parvin (Calponin-like integrin-linked kinase binding protein) (CH-ILKBP)<br>PREDICTED: similar to Aryl hydrocarbon receptor nuclear translocator-like protein 1 (Brain and muscle ARNT-like 1) (Member of PAS protein 3) (Basic-helix-loop-helix-PAS orphan MOP3) (bHLH-PAS protein JAP3) isoform 1 |
| XP_534063.2 |                                                                                                                                                                                                                                                                                                                                 |
| XP_534065.2 | PREDICTED: similar to Glyceraldehyde-3-phosphate dehydrogenase (GAPDH)                                                                                                                                                                                                                                                          |
| XP_534067.2 | PREDICTED: similar to Spondin-1 precursor (F-spondin) (Vascular smooth muscle cell growth promoting factor)                                                                                                                                                                                                                     |
| XP_534069.2 | PREDICTED: similar to coatomer protein complex, subunit beta<br>PREDICTED: similar to Proteasome subunit alpha type 1 (Proteasome component C2) (Macropain subunit C2) (Multicatalytic endopeptidase complex subunit C2)                                                                                                        |
| XP_534070.2 | (Proteasome nu chain) (30 kDa prosomal protein) (PROS-30)                                                                                                                                                                                                                                                                       |

|             |                                                                                                                                                                                                                                                                        |
|-------------|------------------------------------------------------------------------------------------------------------------------------------------------------------------------------------------------------------------------------------------------------------------------|
| XP_534084.2 | PREDICTED: similar to L-lactate dehydrogenase A chain (LDH-A) (LDH muscle subunit) (LDH-M) (Proliferation-inducing gene 19 protein) isoform 1                                                                                                                          |
| XP_534086.2 | PREDICTED: similar to CG5815-PA, isoform A                                                                                                                                                                                                                             |
| XP_534089.2 | PREDICTED: similar to HMT1 hnRNP methyltransferase-like 3 isoform 1                                                                                                                                                                                                    |
| XP_534096.2 | PREDICTED: similar to butyrobetaine (gamma), 2-oxoglutarate dioxygenase 1 (gamma-butyrobetaine hydroxylase)                                                                                                                                                            |
| XP_534100.2 | PREDICTED: similar to methyltransferase 5 domain containing 1                                                                                                                                                                                                          |
| XP_534112.2 | PREDICTED: similar to karyopherin (importin) alpha 3 (predicted)                                                                                                                                                                                                       |
| XP_534118.2 | PREDICTED: similar to Retinoblastoma-associated protein (PP110) (P105-RB) (RB)                                                                                                                                                                                         |
| XP_534120.2 | PREDICTED: similar to Mediator complex subunit 4 (Mediator of RNA polymerase II transcription subunit 4) (Vitamin D3 receptor-interacting protein complex 36 kDa component) (DRIP36) (Activator-recruited cofactor 36 kDa component) (ARC36) (TRAP/SMCC/PC2 subunit... |
| XP_534124.2 | PREDICTED: similar to L-plastin (Lymphocyte cytosolic protein 1) (LCP-1) (LC64P) isoform 1                                                                                                                                                                             |
| XP_534133.2 | PREDICTED: similar to diacylglycerol kinase, eta isoform 2                                                                                                                                                                                                             |
| XP_534135.2 | PREDICTED: similar to kelch repeat and BTB (POZ) domain-containing 6                                                                                                                                                                                                   |
| XP_534136.2 | PREDICTED: similar to WW domain-containing binding protein 4 isoform 1                                                                                                                                                                                                 |
| XP_534148.2 | PREDICTED: similar to LIM domain only protein 7 (LOMP) (F-box only protein 20)                                                                                                                                                                                         |
| XP_534151.2 | PREDICTED: similar to pam, highwire, rpm 1 isoform 1                                                                                                                                                                                                                   |
| XP_534154.2 | PREDICTED: hypothetical protein XP_534154                                                                                                                                                                                                                              |
| XP_534169.2 | PREDICTED: similar to Glyceraldehyde-3-phosphate dehydrogenase (GAPDH)                                                                                                                                                                                                 |
| XP_534177.2 | PREDICTED: similar to CG5038-PA                                                                                                                                                                                                                                        |
| XP_534196.2 | PREDICTED: similar to RAS p21 protein activator 3                                                                                                                                                                                                                      |
| XP_534198.2 | PREDICTED: similar to Heterogeneous nuclear ribonucleoprotein A1 (Helix-destabilizing protein) (Single-strand binding protein) (hnRNP core protein A1) (HDP)                                                                                                           |
| XP_534200.2 | PREDICTED: similar to acetyl-CoA synthetase 2-like                                                                                                                                                                                                                     |
| XP_534201.2 | PREDICTED: similar to brain glycogen phosphorylase isoform 1                                                                                                                                                                                                           |
| XP_534211.2 | PREDICTED: similar to CLIP-associating protein 2 isoform 1                                                                                                                                                                                                             |
| XP_534218.2 | PREDICTED: hypothetical protein XP_534218                                                                                                                                                                                                                              |
| XP_534221.2 | PREDICTED: similar to integrin, alpha 9 precursor                                                                                                                                                                                                                      |
| XP_534236.2 | PREDICTED: similar to dynein light chain-A                                                                                                                                                                                                                             |
| XP_534241.2 | PREDICTED: similar to DNA topoisomerase II, beta isozyme                                                                                                                                                                                                               |
| XP_534249.2 | PREDICTED: similar to p300/CBP-associated factor                                                                                                                                                                                                                       |
| XP_534258.2 | PREDICTED: similar to calpain 7 isoform 1                                                                                                                                                                                                                              |
| XP_534263.2 | PREDICTED: similar to Mitochondrial 39S ribosomal protein L3 (L3mt) (MRP-L3)                                                                                                                                                                                           |
| XP_534266.2 | PREDICTED: similar to DNA topoisomerase II binding protein 1 (DNA topoisomerase IIbeta-binding protein 1) (TopBP1)                                                                                                                                                     |
| XP_534283.2 | PREDICTED: similar to coatomer protein complex, subunit beta 2 (beta prime)                                                                                                                                                                                            |
| XP_534286.2 | PREDICTED: similar to Nicotinamide mononucleotide adenyltransferase 3 (NMN adenyltransferase 3)                                                                                                                                                                        |
| XP_534289.2 | PREDICTED: similar to solute carrier family 25, member 36                                                                                                                                                                                                              |
| XP_534297.2 | PREDICTED: similar to U2-associated SR140 protein                                                                                                                                                                                                                      |
| XP_534305.2 | PREDICTED: similar to TSC22 domain family protein 2 (TSC22-related inducible leucine zipper protein 4) isoform 1                                                                                                                                                       |



|             |                                                                                                                              |
|-------------|------------------------------------------------------------------------------------------------------------------------------|
| XP_534308.2 | PREDICTED: similar to immunoglobulin superfamily, member 10                                                                  |
| XP_534311.2 | PREDICTED: similar to DEAH (Asp-Glu-Ala-His) box polypeptide 36                                                              |
| XP_534312.2 | PREDICTED: similar to G protein-coupled receptor 149                                                                         |
| XP_534320.2 | PREDICTED: similar to G elongation factor, mitochondrial 1                                                                   |
| XP_534321.2 | PREDICTED: similar to optic atrophy 1 isoform 8                                                                              |
| XP_534322.2 | PREDICTED: similar to N-ethylmaleimide sensitive fusion protein attachment protein beta isoform 1                            |
| XP_534341.2 | PREDICTED: similar to ABT1-associated protein isoform 1                                                                      |
| XP_534344.2 | PREDICTED: similar to BTB/POZ domain containing protein 3 isoform 1                                                          |
| XP_534351.2 | PREDICTED: similar to Bone morphogenetic protein 2 precursor (BMP-2) (BMP-2A) isoform 1                                      |
| XP_534352.1 | PREDICTED: similar to minichromosome maintenance protein 8 isoform 1 isoform 1                                               |
| XP_534360.2 | PREDICTED: similar to Attractin precursor (Mahogany homolog) (DPPT-L)                                                        |
| XP_534366.2 | PREDICTED: similar to protein tyrosine phosphatase, receptor type, A isoform 2 precursor isoform 1                           |
| XP_534367.2 | PREDICTED: similar to isocitrate dehydrogenase 3, beta subunit isoform a precursor isoform 1                                 |
| XP_534370.2 | PREDICTED: similar to transglutaminase 3 precursor                                                                           |
| XP_534375.2 | PREDICTED: similar to casein kinase II alpha 1 subunit isoform a isoform 1                                                   |
| XP_534397.2 | PREDICTED: similar to myosin, heavy polypeptide 7B, cardiac muscle, beta                                                     |
| XP_534398.2 | PREDICTED: similar to TRPC4-associated protein isoform a isoform 1                                                           |
| XP_534403.2 | PREDICTED: similar to Serologically defined breast cancer antigen NY-BR-84 isoform 1                                         |
| XP_534405.2 | PREDICTED: similar to NFS1 nitrogen fixation 1 isoform a precursor                                                           |
| XP_534410.2 | PREDICTED: similar to discs, large homolog-associated protein 4 isoform 1                                                    |
| XP_534411.2 | PREDICTED: similar to N-myc downstream-regulated gene 3 isoform a isoform 1                                                  |
| XP_534412.2 | PREDICTED: similar to retinoblastoma-like protein 1 isoform a                                                                |
| XP_534414.2 | PREDICTED: similar to ribophorin II precursor isoform 1                                                                      |
| XP_534421.2 | PREDICTED: similar to chromodomain helicase DNA binding protein 6 isoform 1                                                  |
| XP_534424.2 | PREDICTED: similar to Myb-related protein B (B-Myb)                                                                          |
| XP_534432.2 | PREDICTED: similar to serine/threonine kinase 4 isoform 1                                                                    |
| XP_534448.1 | PREDICTED: similar to Brefeldin A-inhibited guanine nucleotide-exchange protein 2 (Brefeldin A-inhibited GEP 2)              |
| XP_534452.2 | PREDICTED: similar to Protein KIAA1404                                                                                       |
| XP_534461.2 | PREDICTED: similar to HEF-like protein                                                                                       |
| XP_534470.2 | PREDICTED: similar to Synaptonemal complex protein 2 (SCP-2 protein) (Synaptonemal complex lateral element protein) (hsSCP2) |
| XP_534471.2 | PREDICTED: similar to TBP-associated factor 4                                                                                |
| XP_534472.2 | PREDICTED: similar to Proteasome subunit alpha type 7 (Proteasome subunit RC6-1)                                             |
| XP_534478.2 | PREDICTED: similar to src-related kinase lacking C-terminal regulatory tyrosine and N-terminal myristylation sites           |
| XP_534480.2 | PREDICTED: similar to Stathmin 3 (SCG10-like protein) (SCG10-related protein HiAT3) (Hippocampus abundant transcript 3)      |
| XP_534481.2 | PREDICTED: similar to U5 snRNP-associated 102 kDa protein                                                                    |
| XP_534488.2 | PREDICTED: similar to component of oligomeric golgi complex 6                                                                |

|             |                                                                                                                                |
|-------------|--------------------------------------------------------------------------------------------------------------------------------|
| XP_534510.2 | PREDICTED: similar to CG32045-PB, isoform B                                                                                    |
| XP_534526.2 | PREDICTED: similar to RING finger protein 6 (RING-H2 protein) isoform 1                                                        |
| XP_534528.2 | PREDICTED: similar to nucleoporin like 1 isoform a isoform 1                                                                   |
| XP_534532.2 | PREDICTED: similar to mitochondrial intermediate peptidase                                                                     |
| XP_534533.2 | PREDICTED: similar to saccin                                                                                                   |
| XP_534537.2 | PREDICTED: similar to LATS, large tumor suppressor, homolog 2                                                                  |
| XP_534544.2 | PREDICTED: similar to protein tyrosine phosphatase, non-receptor type 18                                                       |
| XP_534545.2 | PREDICTED: similar to IMP4, U3 small nucleolar ribonucleoprotein, homolog                                                      |
| XP_534548.2 | PREDICTED: similar to ankyrin repeat domain 26                                                                                 |
| XP_534555.2 | PREDICTED: similar to KIAA1712                                                                                                 |
| XP_534571.2 | PREDICTED: similar to cell division cycle associated 2                                                                         |
| XP_534572.1 | PREDICTED: similar to neurofilament, light polypeptide isoform 1                                                               |
| XP_534577.2 | PREDICTED: similar to SH3 domain protein 4                                                                                     |
| XP_534580.2 | PREDICTED: similar to Exportin-7 (Ran-binding protein 16) isoform 1                                                            |
| XP_534590.2 | PREDICTED: similar to alpha 3 type IV collagen isoform 1, precursor                                                            |
| XP_534594.2 | PREDICTED: similar to CG8312-PA, isoform A                                                                                     |
| XP_534602.2 | PREDICTED: similar to F59G1.4                                                                                                  |
| XP_534611.2 | PREDICTED: similar to IQ motif containing with AAA domain                                                                      |
| XP_534628.2 | PREDICTED: similar to high density lipoprotein binding protein isoform 2                                                       |
| XP_534632.2 | PREDICTED: similar to Golgi autoantigen, golgin subfamily a, 3                                                                 |
| XP_534635.2 | PREDICTED: similar to unc-51-like kinase 1                                                                                     |
| XP_534636.2 | PREDICTED: similar to splicing factor, arginine/serine-rich 8 isoform 1 isoform 1                                              |
| XP_534639.1 | PREDICTED: similar to glyceraldehyde-3-phosphate dehydrogenase                                                                 |
| XP_534645.1 | PREDICTED: similar to Translation initiation factor eIF-2B alpha subunit (eIF-2B GDP-GTP exchange factor) isoform 1            |
| XP_534647.2 | PREDICTED: similar to CG11448-PA                                                                                               |
| XP_534650.1 | PREDICTED: similar to CDK2 (cyclin-dependent kinase 2)-associated protein 1                                                    |
| XP_534656.2 | PREDICTED: similar to testis-specific protein TSP-NY isoform a                                                                 |
| XP_534660.2 | PREDICTED: similar to vacuolar protein sorting 33A                                                                             |
| XP_534679.2 | PREDICTED: similar to a disintegrin and metalloproteinase domain 1a                                                            |
| XP_534683.2 | PREDICTED: similar to hect domain and RLD 2                                                                                    |
| XP_534686.2 | PREDICTED: similar to protein tyrosine phosphatase, non-receptor type 11                                                       |
| XP_534693.2 | PREDICTED: similar to thyroid hormone receptor associated protein 2                                                            |
| XP_534701.2 | PREDICTED: similar to GCN1 general control of amino-acid synthesis 1-like 1 isoform 1                                          |
| XP_534711.2 | PREDICTED: similar to calcium binding protein 1                                                                                |
| XP_534712.2 | PREDICTED: similar to Acyl-CoA dehydrogenase, short-chain specific, mitochondrial precursor (SCAD) (Butyryl-CoA dehydrogenase) |
| XP_534715.2 | PREDICTED: similar to G protein-coupled receptor kinase-interactor 2 isoform 1 isoform 1                                       |

|             |                                                                                                                                                                                                                                                         |
|-------------|---------------------------------------------------------------------------------------------------------------------------------------------------------------------------------------------------------------------------------------------------------|
| XP_534716.2 | PREDICTED: hypothetical protein XP_534716                                                                                                                                                                                                               |
| XP_534733.2 | PREDICTED: similar to Splicing factor 3 subunit 1 (Spliceosome associated protein 114) (SAP 114) (SF3a120) isoform 1                                                                                                                                    |
| XP_534740.2 | PREDICTED: similar to CG6004-PB                                                                                                                                                                                                                         |
| XP_534748.2 | PREDICTED: similar to Rhabdoid tumor deletion region protein 1 isoform 1                                                                                                                                                                                |
| XP_534755.2 | PREDICTED: similar to chromosome 22 open reading frame 16                                                                                                                                                                                               |
| XP_534763.2 | PREDICTED: similar to Clathrin heavy chain 2 (CLH-22)                                                                                                                                                                                                   |
| XP_534764.2 | PREDICTED: hypothetical protein XP_534764                                                                                                                                                                                                               |
| XP_534781.2 | PREDICTED: similar to Actin, aortic smooth muscle (Alpha-actin 2)                                                                                                                                                                                       |
| XP_534785.2 | PREDICTED: similar to Probable G-protein coupled receptor 84 (Inflammation-related G-protein coupled receptor EX33)                                                                                                                                     |
| XP_534791.2 | PREDICTED: similar to Integrin beta-7 precursor                                                                                                                                                                                                         |
| XP_534792.2 | PREDICTED: similar to tensin like C1 domain containing phosphatase isoform 1                                                                                                                                                                            |
| XP_534793.2 | PREDICTED: similar to eukaryotic translation initiation factor 4B isoform 1                                                                                                                                                                             |
| XP_534794.1 | PREDICTED: similar to Keratin, type I cytoskeletal 18 (Cytokeratin 18) (K18) (CK 18) isoform 1                                                                                                                                                          |
| XP_534795.2 | PREDICTED: similar to Keratin, type II cytoskeletal 7 (Cytokeratin 7) (K7) (CK 7) (Sarcolelectin)                                                                                                                                                       |
| XP_534797.2 | PREDICTED: similar to Sodium channel protein type VIII alpha subunit (Voltage-gated sodium channel alpha subunit Nav1.6) isoform 1                                                                                                                      |
| XP_534802.2 | PREDICTED: similar to CG7020-PA                                                                                                                                                                                                                         |
| XP_534808.1 | PREDICTED: similar to Bax inhibitor-1 (BI-1) (Testis enhanced gene transcript) isoform 1                                                                                                                                                                |
| XP_534817.1 | PREDICTED: similar to Rho-related GTP-binding protein Rho6 (Rho family GTPase 1) (Rnd1) isoform 1                                                                                                                                                       |
| XP_534841.2 | PREDICTED: similar to copine family member isoform 1                                                                                                                                                                                                    |
| XP_534845.2 | PREDICTED: similar to CG6004-PB                                                                                                                                                                                                                         |
| XP_534846.2 | PREDICTED: similar to Rab6 interacting protein 1                                                                                                                                                                                                        |
| XP_534874.2 | PREDICTED: similar to pleckstrin homology domain containing, family A member 5                                                                                                                                                                          |
| XP_534881.2 | PREDICTED: similar to Epidermal growth factor receptor kinase substrate EPS8 isoform 1                                                                                                                                                                  |
| XP_534885.2 | PREDICTED: similar to DEAD (Asp-Glu-Ala-Asp) box polypeptide 47 isoform 1 isoform 1                                                                                                                                                                     |
| XP_534893.2 | PREDICTED: similar to Alpha-2-macroglobulin precursor (Alpha-2-M)                                                                                                                                                                                       |
| XP_534894.1 | PREDICTED: similar to Cation-dependent mannose-6-phosphate receptor precursor (CD Man-6-P receptor) (CD-MPR) (46 kDa mannose 6-phosphate receptor) (MPR 46)                                                                                             |
| XP_534910.2 | PREDICTED: similar to Condensin subunit 1 (Chromosome condensation-related SMC-associated protein 1) (Chromosome-associated protein D2) (hCAP-D2) (XCAP-D2 homolog)                                                                                     |
| XP_534912.2 | PREDICTED: similar to sodium channel, nonvoltage-gated 1 alpha                                                                                                                                                                                          |
| XP_534917.2 | PREDICTED: similar to dual-specificity tyrosine-(Y)-phosphorylation regulated kinase 4                                                                                                                                                                  |
| XP_534932.2 | PREDICTED: similar to Voltage-dependent L-type calcium channel alpha-1C subunit (Voltage-gated calcium channel alpha subunit Cav1.2) (Calcium channel, L type, alpha-1 polypeptide, isoform 1, cardiac muscle) (Mouse brain class C) (MBC) (MELC-CC)... |
| XP_534935.2 | PREDICTED: similar to Cat eye syndrome critical region protein 2                                                                                                                                                                                        |
| XP_534944.2 | PREDICTED: similar to DNA excision repair protein ERCC-6 (Cockayne syndrome protein CSB)                                                                                                                                                                |
| XP_534945.2 | PREDICTED: similar to oxoglutarate dehydrogenase-like                                                                                                                                                                                                   |
| XP_534946.2 | PREDICTED: similar to Poly(ADP-ribose) glycohydrolase                                                                                                                                                                                                   |

|             |                                                                                                                                                                                                                                                            |
|-------------|------------------------------------------------------------------------------------------------------------------------------------------------------------------------------------------------------------------------------------------------------------|
| XP_534947.2 | PREDICTED: similar to nuclear receptor coactivator 4                                                                                                                                                                                                       |
| XP_534957.2 | PREDICTED: similar to M-phase phosphoprotein 1                                                                                                                                                                                                             |
| XP_534962.2 | PREDICTED: similar to tankyrase, TRF1-interacting ankyrin-related ADP-ribose polymerase 2                                                                                                                                                                  |
| XP_534964.2 | PREDICTED: similar to kinesin family member 11                                                                                                                                                                                                             |
| XP_534974.2 | PREDICTED: similar to PDZ and LIM domain 1 (elfin)                                                                                                                                                                                                         |
| XP_534980.1 | PREDICTED: similar to Phosphoglycerate mutase 1 (Phosphoglycerate mutase isozyme B) (PGAM-B) (BPG-dependent PGAM 1) isoform 1                                                                                                                              |
| XP_534982.2 | PREDICTED: similar to MMS19-like (MET18 homolog, <i>S. cerevisiae</i> ) isoform 5                                                                                                                                                                          |
| XP_534984.2 | PREDICTED: similar to F37C4.6                                                                                                                                                                                                                              |
| XP_534993.2 | PREDICTED: similar to mitochondrial ribosomal protein L43 isoform a                                                                                                                                                                                        |
| XP_534996.2 | PREDICTED: similar to meningioma expressed antigen 5 (hyaluronidase) isoform 1                                                                                                                                                                             |
| XP_534997.2 | PREDICTED: similar to LIM domain-binding protein 1 (Nuclear LIM interactor) isoform 1                                                                                                                                                                      |
| XP_534998.2 | PREDICTED: similar to PGC-1 related co-activator isoform 1                                                                                                                                                                                                 |
| XP_535003.2 | PREDICTED: similar to RRP5 protein homolog (Programmed cell death protein 11)                                                                                                                                                                              |
| XP_535006.2 | PREDICTED: similar to alpha 1 type XVII collagen                                                                                                                                                                                                           |
| XP_535019.2 | PREDICTED: similar to CTCL tumor antigen L14-2                                                                                                                                                                                                             |
| XP_535020.2 | PREDICTED: similar to tudor domain containing 1                                                                                                                                                                                                            |
| XP_535021.2 | PREDICTED: similar to A-domain containing protein similar to matrilin and collagen                                                                                                                                                                         |
| XP_535026.2 | PREDICTED: similar to Rab11 family-interacting protein 2 (Rab11-FIP2) (NRip11)                                                                                                                                                                             |
| XP_535038.2 | PREDICTED: similar to phosphatidic acid phosphatase type 2 domain containing 1B                                                                                                                                                                            |
| XP_535042.2 | PREDICTED: similar to transforming, acidic coiled-coil containing protein 2 isoform a                                                                                                                                                                      |
| XP_535044.2 | PREDICTED: similar to Serine protease HTRA1 precursor (L56)                                                                                                                                                                                                |
| XP_535048.2 | PREDICTED: similar to Acyl-CoA dehydrogenase, short/branched chain specific, mitochondrial precursor (SBCAD) (2-methyl branched chain acyl-CoA dehydrogenase) (2-MEBCAD) (2-methylbutyryl-coenzyme A dehydrogenase) (2-methylbutyryl-CoA dehydrogenase)... |
| XP_535054.2 | PREDICTED: similar to erythroid differentiation-related factor 1 isoform 1                                                                                                                                                                                 |
| XP_535063.2 | PREDICTED: similar to minichromosome maintenance protein 4                                                                                                                                                                                                 |
| XP_535077.2 | PREDICTED: similar to PRIP-interacting protein PIPMT isoform 1                                                                                                                                                                                             |
| XP_535078.2 | PREDICTED: similar to Yamaguchi sarcoma viral (v-yes-1) oncogene homolog isoform 1                                                                                                                                                                         |
| XP_535084.2 | PREDICTED: similar to neutral sphingomyelinase (N-SMase) activation associated factor                                                                                                                                                                      |
| XP_535098.2 | PREDICTED: similar to organic anion transporter polypeptide-related protein 4                                                                                                                                                                              |
| XP_535113.2 | PREDICTED: similar to Mitochondrial 28S ribosomal protein S22 (S22mt) (MRP-S22)                                                                                                                                                                            |
| XP_535120.2 | PREDICTED: similar to lactate dehydrogenase A -like                                                                                                                                                                                                        |
| XP_535123.1 | PREDICTED: similar to L-lactate dehydrogenase B chain (LDH-B) (LDH heart subunit) (LDH-H)                                                                                                                                                                  |
| XP_535124.1 | PREDICTED: similar to 40S ribosomal protein S4, X isoform                                                                                                                                                                                                  |
| XP_535126.2 | PREDICTED: similar to nibrin isoform 1, partial                                                                                                                                                                                                            |
| XP_535129.2 | PREDICTED: similar to pyruvate dehydrogenase phosphatase precursor                                                                                                                                                                                         |
| XP_535130.2 | PREDICTED: similar to CG3496-PA                                                                                                                                                                                                                            |

|             |                                                                                                                                                                                                                  |
|-------------|------------------------------------------------------------------------------------------------------------------------------------------------------------------------------------------------------------------|
| XP_535131.2 | PREDICTED: similar to CG15738-PA                                                                                                                                                                                 |
| XP_535133.2 | PREDICTED: similar to syndecan 2 precursor                                                                                                                                                                       |
| XP_535140.2 | PREDICTED: similar to cullin 2 isoform 1                                                                                                                                                                         |
| XP_535141.2 | PREDICTED: similar to partitioning-defective protein 3 homolog                                                                                                                                                   |
| XP_535142.2 | PREDICTED: similar to Neuropilin-1 precursor (Vascular endothelial cell growth factor 165 receptor)                                                                                                              |
| XP_535149.2 | PREDICTED: similar to WW domain-containing adapter with a coiled-coil region isoform 1 isoform 1                                                                                                                 |
| XP_535153.2 | PREDICTED: similar to Transcription factor 8 (NIL-2-A zinc finger protein) (Negative regulator of IL2) isoform 1                                                                                                 |
| XP_535169.2 | PREDICTED: similar to amyloid beta (A4) precursor protein-binding, family B, member 1 interacting protein                                                                                                        |
| XP_535172.2 | PREDICTED: similar to YME1-like 1 isoform 3                                                                                                                                                                      |
| XP_535174.2 | PREDICTED: similar to signal transducing adaptor molecule 1                                                                                                                                                      |
| XP_535175.2 | PREDICTED: similar to vimentin isoform 1                                                                                                                                                                         |
| XP_535177.1 | PREDICTED: similar to Ras suppressor protein 1                                                                                                                                                                   |
| XP_535179.2 | PREDICTED: similar to Histone-lysine N-methyltransferase, H3 lysine-9 specific 2 (Histone H3-K9 methyltransferase 2) (H3-K9-HMTase 2) (Suppressor of variegation 3-9 homolog 2) (Su(var)3-9 homolog 2) isoform 1 |
| XP_535180.2 | PREDICTED: similar to heat shock 70kDa protein 14 isoform 1                                                                                                                                                      |
| XP_535192.2 | PREDICTED: similar to dehydrogenase E1 and transketolase domain containing protein 1                                                                                                                             |
| XP_535193.2 | PREDICTED: similar to ATP synthase, H <sup>+</sup> transporting, mitochondrial F1 complex, gamma subunit isoform L (liver) precursor isoform 1                                                                   |
| XP_535200.2 | PREDICTED: similar to metalloprotease 1                                                                                                                                                                          |
| XP_535201.2 | PREDICTED: similar to phosphofructokinase, platelet                                                                                                                                                              |
| XP_535203.2 | PREDICTED: similar to Nucleolar GTP-binding protein 1 (Chronic renal failure gene protein) (GTP-binding protein NGB)                                                                                             |
| XP_535204.2 | PREDICTED: similar to La ribonucleoprotein domain family, member 5                                                                                                                                               |
| XP_535217.2 | PREDICTED: similar to protocadherin gamma subfamily C, 5 isoform 1 precursor isoform 2                                                                                                                           |
| XP_535224.2 | PREDICTED: similar to Rho-GTPase-activating protein 26 (Oligophrenin-1 like protein) (GTPase regulator associated with focal adhesion kinase)                                                                    |
| XP_535225.2 | PREDICTED: similar to Glucocorticoid receptor (GR)                                                                                                                                                               |
| XP_535229.1 | PREDICTED: similar to Leucyl-tRNA synthetase, cytoplasmic (Leucine--tRNA ligase) (LeuRS)                                                                                                                         |
| XP_535232.2 | PREDICTED: similar to gamma-aminobutyric acid (GABA-B) receptor binding protein isoform 1                                                                                                                        |
| XP_535236.2 | PREDICTED: similar to cell division cycle 20 homolog                                                                                                                                                             |
| XP_535238.2 | PREDICTED: similar to DEAH (Asp-Glu-Ala-His) box polypeptide 29                                                                                                                                                  |
| XP_535239.2 | PREDICTED: similar to Interleukin-6 receptor beta chain precursor (IL-6R-beta) (Interleukin 6 signal transducer) (Membrane glycoprotein 130) (gp130) (Oncostatin M receptor) (CDw130) (CD130 antigen)            |
| XP_535240.2 | PREDICTED: similar to Mitogen-activated protein kinase kinase kinase 1 (MAPK/ERK kinase kinase 1) (MEK kinase 1) (MEKK 1)                                                                                        |
| XP_535259.2 | PREDICTED: similar to neurolysin                                                                                                                                                                                 |
| XP_535262.2 | PREDICTED: similar to mitochondrial ribosomal protein S36                                                                                                                                                        |
| XP_535267.2 | PREDICTED: similar to transcription factor-like nuclear regulator                                                                                                                                                |
| XP_535268.2 | PREDICTED: similar to methylcrotonoyl-Coenzyme A carboxylase 2 (beta) (predicted)                                                                                                                                |
| XP_535269.2 | PREDICTED: similar to Microtubule-associated protein 1B (MAP 1B) isoform 1                                                                                                                                       |

|             |                                                                                                                                                                                                                        |
|-------------|------------------------------------------------------------------------------------------------------------------------------------------------------------------------------------------------------------------------|
| XP_535270.2 | PREDICTED: similar to transportin 1                                                                                                                                                                                    |
| XP_535271.2 | PREDICTED: similar to FCH domain only 2                                                                                                                                                                                |
| XP_535278.2 | PREDICTED: similar to Aspartate aminotransferase, mitochondrial precursor (Transaminase A) (Glutamate oxaloacetate transaminase-2)                                                                                     |
| XP_535279.2 | PREDICTED: similar to CCR4-NOT transcription complex, subunit 1 isoform b isoform 1                                                                                                                                    |
| XP_535281.2 | PREDICTED: similar to plasma kallikrein-like protein 4                                                                                                                                                                 |
| XP_535289.2 | PREDICTED: similar to copine II isoform 1                                                                                                                                                                              |
| XP_535292.2 | PREDICTED: similar to solute carrier family 12 (sodium/chloride transporters), member 3                                                                                                                                |
| XP_535300.2 | PREDICTED: similar to matrix metalloproteinase 2 preproprotein                                                                                                                                                         |
| XP_535301.2 | PREDICTED: similar to fatso                                                                                                                                                                                            |
| XP_535303.2 | PREDICTED: similar to Retinoblastoma-like protein 2 (130 kDa retinoblastoma-associated protein) (PRB2) (P130) (RBR-2) isoform 1                                                                                        |
| XP_535304.2 | PREDICTED: similar to chromodomain helicase DNA binding protein 9 isoform 1                                                                                                                                            |
| XP_535314.2 | PREDICTED: similar to ATP-binding cassette, sub-family C, member 11 isoform a isoform 1                                                                                                                                |
| XP_535319.2 | PREDICTED: similar to DnaJ homolog subfamily A member 2 (HIRA interacting protein 4) (Cell cycle progression restoration gene 3 protein) (Dnj3)                                                                        |
| XP_535320.2 | PREDICTED: similar to ornithine decarboxylase-like protein isoform 1                                                                                                                                                   |
| XP_535321.2 | PREDICTED: similar to Adenylate kinase isoenzyme 2, mitochondrial (ATP-AMP transphosphorylase) isoform 1                                                                                                               |
| XP_535324.2 | PREDICTED: similar to Tyrosyl-tRNA synthetase, cytoplasmic (Tyrosyl--tRNA ligase) (TyrRS) isoform 1                                                                                                                    |
| XP_535334.2 | PREDICTED: similar to Trans-2-enoyl-CoA reductase, mitochondrial precursor (HsNrnf-1) (NRBF-1)                                                                                                                         |
| XP_535340.2 | PREDICTED: similar to DnaJ (Hsp40) homolog, subfamily C, member 8                                                                                                                                                      |
| XP_535345.2 | PREDICTED: similar to Sodium/hydrogen exchanger 1 (Na <sup>+</sup> )/H <sup>+</sup> exchanger 1) (NHE-1) (Na <sup>+</sup> /H <sup>+</sup> antiporter, amiloride-sensitive) (APNH)                                      |
| XP_535358.2 | PREDICTED: similar to serine/arginine repetitive matrix 1 isoform 1                                                                                                                                                    |
| XP_535366.2 | PREDICTED: similar to amine oxidase (flavin containing) domain 2 isoform a isoform 1                                                                                                                                   |
| XP_535371.2 | PREDICTED: similar to Basement membrane-specific heparan sulfate proteoglycan core protein precursor (HSPG) (Perlecan) (PLC)                                                                                           |
| XP_535372.2 | PREDICTED: similar to ubiquitin specific protease 48 isoform 1                                                                                                                                                         |
| XP_535377.2 | PREDICTED: similar to eukaryotic translation initiation factor 4 gamma, 3                                                                                                                                              |
| XP_535384.2 | PREDICTED: similar to F-actin capping protein beta subunit                                                                                                                                                             |
| XP_535385.2 | PREDICTED: similar to aldo-keto reductase family 7, member A5 (aflatoxin aldehyde reductase)                                                                                                                           |
| XP_535389.2 | PREDICTED: similar to immunoglobulin superfamily, member 21                                                                                                                                                            |
| XP_535393.2 | PREDICTED: similar to Adaptin ear-binding coat-associated protein 2 (NECAP-2) isoform 2                                                                                                                                |
| XP_535400.2 | PREDICTED: similar to vacuolar protein sorting 13D isoform 2                                                                                                                                                           |
| XP_535402.2 | PREDICTED: similar to guanine nucleotide binding protein (G protein), alpha inhibiting activity polypeptide 1                                                                                                          |
| XP_535404.2 | PREDICTED: similar to Chloride channel protein 6 (ClC-6)                                                                                                                                                               |
|             | PREDICTED: similar to FKBP12-rapamycin complex-associated protein (FK506-binding protein 12-rapamycin complex-associated protein 1) (Rapamycin target protein) (RAP1) (Mammalian target of rapamycin) (MTOR) isoform 1 |
| XP_535407.2 |                                                                                                                                                                                                                        |
| XP_535408.2 | PREDICTED: similar to exosome component 10 isoform 1                                                                                                                                                                   |
| XP_535411.2 | PREDICTED: similar to 6-phosphogluconate dehydrogenase, decarboxylating isoform 1                                                                                                                                      |
| XP_535417.1 | PREDICTED: similar to RIKEN cDNA 2900064A13 isoform 1                                                                                                                                                                  |

|             |                                                                                                                                                                                    |
|-------------|------------------------------------------------------------------------------------------------------------------------------------------------------------------------------------|
| XP_535428.2 | PREDICTED: similar to CG5913-PA                                                                                                                                                    |
| XP_535431.2 | PREDICTED: similar to Eukaryotic translation initiation factor 2-alpha kinase 4 (GCN2-like protein)                                                                                |
| XP_535434.2 | PREDICTED: similar to cancer susceptibility candidate 5 isoform 2                                                                                                                  |
| XP_535437.2 | PREDICTED: similar to CG4051-PA                                                                                                                                                    |
| XP_535440.2 | PREDICTED: similar to MAX-interacting protein                                                                                                                                      |
| XP_535442.1 | PREDICTED: similar to Synaptosomal-associated protein 23 (SNAP-23) (Vesicle-membrane fusion protein SNAP-23) (Syndet)                                                              |
| XP_535443.2 | PREDICTED: similar to CG3040-PA                                                                                                                                                    |
| XP_535450.2 | PREDICTED: similar to CG14616-PD, isoform D isoform 1                                                                                                                              |
| XP_535451.1 | PREDICTED: similar to creatine kinase, mitochondrial 1B precursor isoform 1                                                                                                        |
| XP_535453.2 | PREDICTED: similar to protein disulfide isomerase-associated 3 precursor                                                                                                           |
| XP_535459.2 | PREDICTED: similar to ring finger protein 36 (predicted)                                                                                                                           |
| XP_535469.2 | PREDICTED: similar to CG15792-PA, isoform A                                                                                                                                        |
| XP_535474.1 | PREDICTED: similar to Ubiquitin carboxyl-terminal hydrolase 8 (Ubiquitin thiolesterase 8) (Ubiquitin-specific processing protease 8) (Deubiquitinating enzyme 8) (hUBPy) isoform 1 |
| XP_535479.2 | PREDICTED: similar to Adapter-related protein complex 4 epsilon 1 subunit (Epsilon subunit of AP-4) (AP-4 adapter complex epsilon subunit)                                         |
| XP_535480.2 | PREDICTED: similar to collomin                                                                                                                                                     |
| XP_535481.2 | PREDICTED: similar to Dmx-like 2 isoform 1                                                                                                                                         |
| XP_535487.2 | PREDICTED: similar to Myosin-5A (Myosin Va) (Dilute myosin heavy chain, non-muscle)                                                                                                |
| XP_535496.2 | PREDICTED: similar to ADAM 10 precursor (A disintegrin and metalloproteinase domain 10) (Mammalian disintegrin-metalloprotease) (Kuzbanian protein homolog) isoform 1              |
| XP_535500.2 | PREDICTED: similar to myosin IE                                                                                                                                                    |
| XP_535503.2 | PREDICTED: similar to RAR-related orphan receptor A isoform d                                                                                                                      |
| XP_535506.2 | PREDICTED: similar to tropomyosin 1 alpha chain isoform 5 isoform 1                                                                                                                |
| XP_535515.2 | PREDICTED: similar to zinc finger protein 609                                                                                                                                      |
| XP_535517.2 | PREDICTED: similar to putative neuronal cell adhesion molecule                                                                                                                     |
| XP_535523.2 | PREDICTED: similar to Zwilch                                                                                                                                                       |
| XP_535526.2 | PREDICTED: similar to fem-1 homolog b                                                                                                                                              |
| XP_535527.2 | PREDICTED: similar to integrin, alpha 11 precursor                                                                                                                                 |
| XP_535528.2 | PREDICTED: similar to kinesin family member 23 isoform 1                                                                                                                           |
| XP_535531.2 | PREDICTED: similar to Pyruvate kinase, isozymes M1/M2 (Pyruvate kinase muscle isozyme) (Cytosolic thyroid hormone-binding protein) (CTHBP) (THBP1) isoform 1                       |
| XP_535535.2 | PREDICTED: similar to Potassium/sodium hyperpolarization-activated cyclic nucleotide-gated channel 4                                                                               |
| XP_535541.2 | PREDICTED: similar to Dual specificity protein kinase CLK3 (CDC-like kinase 3) isoform 1                                                                                           |
| XP_535546.2 | PREDICTED: similar to transcriptional co-repressor Sin3A                                                                                                                           |
| XP_535547.2 | PREDICTED: similar to zinc finger protein 291                                                                                                                                      |
| XP_535548.2 | PREDICTED: similar to CG2924-PC, isoform C                                                                                                                                         |
| XP_535555.2 | PREDICTED: similar to 1,4-alpha-glucan branching enzyme (Glycogen branching enzyme) (Brancher enzyme)                                                                              |
| XP_535560.2 | PREDICTED: similar to receptor interacting protein 140                                                                                                                             |

|             |                                                                                                                                                                                                            |
|-------------|------------------------------------------------------------------------------------------------------------------------------------------------------------------------------------------------------------|
| XP_535576.2 | PREDICTED: similar to chaperonin containing TCP1, subunit 8 (theta) isoform 1                                                                                                                              |
| XP_535579.2 | PREDICTED: similar to Protein C21orf63 precursor (SUE21) isoform 2                                                                                                                                         |
| XP_535580.2 | PREDICTED: similar to Synaptojanin-1 (Synaptic inositol-1,4,5-trisphosphate 5-phosphatase 1) isoform 1                                                                                                     |
| XP_535583.2 | PREDICTED: similar to SON protein (SON3) (Negative regulatory element-binding protein) (NRE-binding protein) (DBP-5) (Bax antagonist selected in saccharomyces 1) (BASS1) isoform 2                        |
| XP_535589.2 | PREDICTED: similar to Carbonyl reductase [NADPH] 1 (NADPH-dependent carbonyl reductase 1) (Prostaglandin-E(2) 9-reductase) (Prostaglandin 9-ketoreductase) (15-hydroxyprostaglandin dehydrogenase [NADP+]) |
| XP_535594.2 | PREDICTED: similar to CG6652-PB, isoform B                                                                                                                                                                 |
| XP_535598.2 | PREDICTED: similar to NADH-ubiquinone oxidoreductase 9 kDa subunit, mitochondrial precursor (Complex I-9KD) (CI-9KD)                                                                                       |
| XP_535599.2 | PREDICTED: similar to Splicing factor U2AF 35 kDa subunit (U2 auxiliary factor 35 kDa subunit) (U2 snRNP auxiliary factor small subunit)                                                                   |
| XP_535600.2 | PREDICTED: similar to Protein KIAA0179                                                                                                                                                                     |
| XP_535607.2 | PREDICTED: similar to General vesicular transport factor p115 (Transcytosis associated protein) (TAP) (Vesicle docking protein) isoform 1                                                                  |
| XP_535623.2 | PREDICTED: similar to Fraser syndrome 1 isoform 1                                                                                                                                                          |
| XP_535624.2 | PREDICTED: similar to Annexin A3 (Annexin III) (Lipocortin III) (Placental anticoagulant protein III) (PAP-III) (35-alpha calcimedlin) (Inositol 1,2-cyclic phosphate 2-phosphohydrolase)                  |
| XP_535627.2 | PREDICTED: similar to heterogeneous nuclear ribonucleoprotein D isoform b isoform 1                                                                                                                        |
| XP_535630.2 | PREDICTED: similar to SEC31-like 1 isoform 1 isoform 1                                                                                                                                                     |
| XP_535637.2 | PREDICTED: similar to CG3209-PB, isoform B                                                                                                                                                                 |
| XP_535647.1 | PREDICTED: similar to nudix (nucleoside diphosphate linked moiety X)-type motif 9                                                                                                                          |
| XP_535649.2 | PREDICTED: similar to secreted phosphoprotein 1                                                                                                                                                            |
| XP_535652.2 | PREDICTED: similar to HECT domain and RCC1-like domain protein 5 (Cyclin-E binding protein 1)                                                                                                              |
| XP_535654.1 | PREDICTED: similar to tigger transposable element derived 2                                                                                                                                                |
| XP_535656.1 | PREDICTED: similar to alpha-synuclein isoform NACP140 isoform 1                                                                                                                                            |
| XP_535658.2 | PREDICTED: similar to SWI/SNF-related, matrix-associated actin-dependent regulator of chromatin, subfamily a, containing DEAD/H box 1 isoform 1                                                            |
| XP_535666.2 | PREDICTED: similar to Alcohol dehydrogenase 6                                                                                                                                                              |
| XP_535669.2 | PREDICTED: similar to Dual adapter for phosphotyrosine and 3-phosphotyrosine and 3-phosphoinositide (hDAPP1) (B cell adapter molecule of 32 kDa) (B lymphocyte adapter protein Bam32)                      |
| XP_535678.2 | PREDICTED: similar to CG2083-PA                                                                                                                                                                            |
| XP_535681.2 | PREDICTED: similar to Dickkopf related protein-2 precursor (Dkk-2) (Dickkopf-2) (hDkk-2)                                                                                                                   |
| XP_535696.2 | PREDICTED: similar to Glutamyl aminopeptidase (EAP) (Aminopeptidase A) (APA) (Differentiation antigen gp160)                                                                                               |
| XP_535701.2 | PREDICTED: similar to proteasome 26S ATPase subunit 6                                                                                                                                                      |
| XP_535708.2 | PREDICTED: similar to Vitamin K-dependent protein S precursor                                                                                                                                              |
| XP_535710.2 | PREDICTED: similar to Absent in melanoma 1 protein                                                                                                                                                         |
| XP_535719.2 | PREDICTED: similar to Mitochondrial precursor proteins import receptor (Translocase of outer membrane TOM70)                                                                                               |
| XP_535728.2 | PREDICTED: similar to HMG-BOX transcription factor BBX isoform 1                                                                                                                                           |
| XP_535744.2 | PREDICTED: hypothetical protein XP_535744                                                                                                                                                                  |
| XP_535750.2 | PREDICTED: similar to pregnane X receptor isoform 2                                                                                                                                                        |



|             |                                                                                                                                                                                                  |
|-------------|--------------------------------------------------------------------------------------------------------------------------------------------------------------------------------------------------|
| XP_535761.1 | PREDICTED: similar to Importin alpha-1 subunit (Karyopherin alpha-1 subunit) (SRP1-beta) (RAG cohort protein 2) (Nucleoprotein interactor 1) (NPI-1) isoform 1                                   |
| XP_535763.2 | PREDICTED: similar to Hspb associated protein 1                                                                                                                                                  |
| XP_535764.2 | PREDICTED: similar to disrupted in renal carcinoma 2                                                                                                                                             |
| XP_535765.2 | PREDICTED: similar to Protein disulfide-isomerase A5 precursor (Protein disulfide isomerase-related protein)                                                                                     |
| XP_535768.2 | PREDICTED: similar to kalirin, RhoGEF kinase isoform 1                                                                                                                                           |
| XP_535771.2 | PREDICTED: similar to Sorting nexin-4                                                                                                                                                            |
| XP_535778.2 | PREDICTED: similar to GPI-mannosyltransferase subunit                                                                                                                                            |
| XP_535785.2 | PREDICTED: similar to triple functional domain (PTPRF interacting)                                                                                                                               |
| XP_535802.2 | PREDICTED: similar to NADH dehydrogenase (ubiquinone) Fe-S protein 6, 13kDa (NADH-coenzyme Q reductase)                                                                                          |
| XP_535803.1 | PREDICTED: similar to cisplatin resistance related protein CRR9p isoform 1                                                                                                                       |
| XP_535804.2 | PREDICTED: similar to Sodium- and chloride-dependent transporter XTRP2 (Solute carrier family 6 member 18)                                                                                       |
| XP_535811.2 | PREDICTED: similar to mitochondrial ribosomal protein L47 isoform 1                                                                                                                              |
| XP_535813.2 | PREDICTED: similar to Ubiquitin carboxyl-terminal hydrolase 13 (Ubiquitin thiolesterase 13) (Ubiquitin-specific processing protease 13) (Deubiquitinating enzyme 13) (Isopeptidase T-3) (ISOT-3) |
| XP_535818.2 | PREDICTED: similar to Rho family guanine-nucleotide exchange factor                                                                                                                              |
| XP_535824.2 | PREDICTED: similar to proteasome 26S non-ATPase subunit 2                                                                                                                                        |
| XP_535834.2 | PREDICTED: similar to DnaJ homolog subfamily B member 11 precursor (ER-associated dnaJ protein 3) (ErJ3) (ER-associated Hsp40 co-chaperone) (hDj9) (PWP1-interacting protein 4)                  |
| XP_535836.1 | PREDICTED: similar to kininogen 1                                                                                                                                                                |
| XP_535844.2 | PREDICTED: similar to Ymer protein long isoform                                                                                                                                                  |
| XP_535847.2 | PREDICTED: similar to schwannomin interacting protein 1                                                                                                                                          |
| XP_535848.2 | PREDICTED: similar to Structural maintenance of chromosomes 4-like 1 protein (Chromosome-associated polypeptide C) (hCAP-C) (XCAP-C homolog) isoform 1                                           |
| XP_535852.2 | PREDICTED: hypothetical protein XP_535852                                                                                                                                                        |
| XP_535863.2 | PREDICTED: similar to Sec5 protein                                                                                                                                                               |
| XP_535866.2 | PREDICTED: similar to Placental thrombin inhibitor (Cytoplasmic antiproteinase) (CAP) (Protease inhibitor 6) (PI-6) (Serpin B6) isoform 1                                                        |
| XP_535868.2 | PREDICTED: similar to tubulin, beta 2                                                                                                                                                            |
| XP_535873.2 | PREDICTED: similar to peroxisomal D3,D2-enoyl-CoA isomerase isoform 1                                                                                                                            |
| XP_535876.2 | PREDICTED: similar to Coagulation factor XIII A chain precursor (Coagulation factor XIIIa) (Protein-glutamine gamma-glutamyltransferase A chain) (Transglutaminase A chain) isoform 1            |
| XP_535880.2 | PREDICTED: similar to bone morphogenetic protein 6                                                                                                                                               |
| XP_535885.1 | PREDICTED: similar to transmembrane protein 14C                                                                                                                                                  |
| XP_535888.2 | PREDICTED: similar to phosphatase and actin regulator 1 isoform 1                                                                                                                                |
| XP_535892.2 | PREDICTED: similar to nucleolar protein 7, 27kDa                                                                                                                                                 |
| XP_535895.2 | PREDICTED: similar to jumonji, AT rich interactive domain 2 protein                                                                                                                              |
| XP_535898.2 | PREDICTED: similar to nucleoporin 153kDa                                                                                                                                                         |
| XP_535916.2 | PREDICTED: similar to 60S ribosomal protein L32                                                                                                                                                  |
| XP_535925.2 | PREDICTED: similar to TPR domain, ankyrin-repeat and coiled-coil-containing                                                                                                                      |

|             |                                                                                                                                                                                                                              |
|-------------|------------------------------------------------------------------------------------------------------------------------------------------------------------------------------------------------------------------------------|
| XP_535932.2 | PREDICTED: similar to solute carrier family 4, sodium bicarbonate transporter-like, member 10                                                                                                                                |
| XP_535933.2 | PREDICTED: similar to Dipeptidyl peptidase 4 (Dipeptidyl peptidase IV) (DPP IV) (T-cell activation antigen CD26) (TP103) (Adenosine deaminase complexing protein-2) (ADABP)                                                  |
| XP_535934.2 | PREDICTED: similar to potassium voltage-gated channel, subfamily H, member 7 isoform 1 isoform 1                                                                                                                             |
| XP_535940.2 | PREDICTED: similar to polypeptide N-acetylgalactosaminyltransferase 3 isoform 1                                                                                                                                              |
| XP_535941.2 | PREDICTED: similar to Sodium channel protein type I alpha subunit (Voltage-gated sodium channel alpha subunit Nav1.1) (Sodium channel protein, brain I alpha subunit) isoform 1                                              |
| XP_535943.2 | PREDICTED: similar to cardiomyopathy associated 3                                                                                                                                                                            |
| XP_535946.2 | PREDICTED: similar to Low-density lipoprotein receptor-related protein 2 precursor (Megalin) (Glycoprotein 330) (gp330)                                                                                                      |
| XP_535952.2 | PREDICTED: similar to autoantigen La                                                                                                                                                                                         |
| XP_535954.2 | PREDICTED: similar to zinc finger protein 650 isoform 1                                                                                                                                                                      |
| XP_535956.2 | PREDICTED: similar to myosin IIIB                                                                                                                                                                                            |
| XP_535960.2 | PREDICTED: similar to cytochrome b reductase 1                                                                                                                                                                               |
| XP_535964.2 | PREDICTED: similar to Integrin alpha-6 precursor (VLA-6) (CD49f) isoform 1                                                                                                                                                   |
| XP_535972.2 | PREDICTED: similar to Lunapark isoform 1                                                                                                                                                                                     |
| XP_535986.2 | PREDICTED: similar to sperm specific antigen 2                                                                                                                                                                               |
| XP_535990.2 | PREDICTED: similar to NCK-associated protein 1 isoform 2                                                                                                                                                                     |
| XP_535991.1 | PREDICTED: similar to tigger transposable element derived 1                                                                                                                                                                  |
| XP_535998.2 | PREDICTED: similar to Collagen alpha 2(V) chain precursor                                                                                                                                                                    |
| XP_535999.2 | PREDICTED: similar to Solute carrier family 40, member 1 (Ferroportin-1) (Iron-regulated transporter 1)                                                                                                                      |
| XP_536007.2 | PREDICTED: similar to signal transducer and activator of transcription 4                                                                                                                                                     |
| XP_536014.2 | PREDICTED: similar to ankyrin repeat domain 28                                                                                                                                                                               |
| XP_536016.2 | PREDICTED: similar to 60 kDa heat shock protein, mitochondrial precursor (Hsp60) (60 kDa chaperonin) (CPN60) (Heat shock protein 60) (HSP-60) (Mitochondrial matrix protein P1) (P60 lymphocyte protein) (HuCHA60) isoform 1 |
| XP_536020.2 | PREDICTED: similar to 130kDa-Ins(1,4,5)P3 binding protein                                                                                                                                                                    |
| XP_536032.2 | PREDICTED: similar to Alsln (Amyotrophic lateral sclerosis protein 2)                                                                                                                                                        |
| XP_536037.2 | PREDICTED: similar to amyotrophic lateral sclerosis 2 (juvenile) chromosome region, candidate 8                                                                                                                              |
| XP_536038.2 | PREDICTED: similar to Amyotrophic lateral sclerosis 2 chromosome region candidate gene protein 19 (Partitioning-defective 3-like protein) (PAR3-L protein) (PAR3-beta)                                                       |
| XP_536043.2 | PREDICTED: hypothetical protein XP_536043                                                                                                                                                                                    |
| XP_536048.2 | PREDICTED: similar to phosphatidylinositol-3-phosphate/phosphatidylinositol 5-kinase, type III isoform 2 isoform 1                                                                                                           |
| XP_536052.1 | PREDICTED: hypothetical protein XP_536052                                                                                                                                                                                    |
| XP_536054.2 | PREDICTED: similar to Myosin light chain 1, skeletal muscle isoform (MLC1F) (A1 catalytic) (Alkali myosin light chain 1)                                                                                                     |
| XP_536057.2 | PREDICTED: similar to sperm associated antigen 16 isoform 1                                                                                                                                                                  |
| XP_536058.2 | PREDICTED: similar to ATP-binding cassette, sub-family A, member 12 (ATP-binding cassette transporter 12) (ATP-binding cassette 12) isoform 1                                                                                |
| XP_536059.2 | PREDICTED: similar to fibronectin 1 isoform 1 preproprotein                                                                                                                                                                  |
| XP_536060.2 | PREDICTED: similar to peroxisomal trans-2-enoyl-CoA reductase isoform 1                                                                                                                                                      |
| XP_536061.2 | PREDICTED: similar to ATP-dependent DNA helicase II                                                                                                                                                                          |

|             |                                                                                                                                                                                                                        |
|-------------|------------------------------------------------------------------------------------------------------------------------------------------------------------------------------------------------------------------------|
| XP_536066.2 | PREDICTED: similar to actin related protein 2/3 complex subunit 2                                                                                                                                                      |
| XP_536070.1 | PREDICTED: similar to Mitochondrial chaperone BCS1 (BCS1-like protein) (H-BCS1) isoform 1                                                                                                                              |
| XP_536072.2 | PREDICTED: similar to serine/threonine kinase 36 (fused homolog, Drosophila) isoform 1                                                                                                                                 |
| XP_536075.2 | PREDICTED: similar to K06H7.3 isoform 1                                                                                                                                                                                |
| XP_536080.2 | PREDICTED: similar to Receptor-type tyrosine-protein phosphatase-like N precursor (R-PTP-N) (PTP IA-2) (Islet cell antigen 512) (ICA 512) (Islet cell autoantigen 3)                                                   |
| XP_536084.2 | PREDICTED: similar to Ephrin type-A receptor 4 precursor (Tyrosine-protein kinase receptor SEK) (Receptor protein-tyrosine kinase HEK8)                                                                                |
| XP_536091.2 | PREDICTED: similar to zinc finger CCCH type containing 11A                                                                                                                                                             |
| XP_536095.2 | PREDICTED: similar to pleckstrin homology domain containing, family A member 6                                                                                                                                         |
| XP_536097.2 | PREDICTED: similar to phosphoinositide-3-kinase, class 2, beta polypeptide                                                                                                                                             |
| XP_536102.2 | PREDICTED: hypothetical protein XP_536102                                                                                                                                                                              |
| XP_536110.2 | PREDICTED: similar to Complement factor H precursor (H factor 1) isoform 2                                                                                                                                             |
| XP_536115.2 | PREDICTED: similar to 60kD Ro/SSA autoantigen                                                                                                                                                                          |
| XP_536120.2 | PREDICTED: similar to glutamyl-prolyl tRNA synthetase isoform 1                                                                                                                                                        |
| XP_536121.2 | PREDICTED: similar to mitochondrial isoleucine tRNA synthetase                                                                                                                                                         |
| XP_536131.2 | PREDICTED: similar to Coatomer alpha subunit (Alpha-coat protein) (Alpha-COP) (HEPCOP) (HEP-COP)                                                                                                                       |
| XP_536132.2 | PREDICTED: similar to Junctional adhesion molecule A precursor (JAM-A) (Junctional adhesion molecule 1) (JAM) (Platelet adhesion molecule 1) (PAM-1) (Platelet F11 receptor)                                           |
| XP_536139.2 | PREDICTED: similar to Apolipoprotein A-II precursor (Apo-AII) (ApoA-II)                                                                                                                                                |
| XP_536140.1 | PREDICTED: similar to succinate dehydrogenase complex, subunit C precursor                                                                                                                                             |
| XP_536141.2 | PREDICTED: similar to Low affinity immunoglobulin gamma Fc region receptor III-A precursor (IgG Fc receptor III-2) (Fc-gamma RIII-alpha) (Fc-gamma RIIIa) (FcRIIIa) (Fc-gamma RIII) (FcRIII) (Antigen CD16-A) (FcR-10) |
| XP_536142.1 | PREDICTED: similar to dual specificity phosphatase 12                                                                                                                                                                  |
| XP_536143.2 | PREDICTED: similar to Serine/threonine-protein kinase Kist (Kinase interacting with stathmin) (U2AF homology motif kinase 1) (PAM COOH-terminal interactor protein 2) (P-CIP2)                                         |
| XP_536144.2 | PREDICTED: similar to discoidin domain receptor family, member 2 precursor isoform 1                                                                                                                                   |
| XP_536152.2 | PREDICTED: similar to melanoma inhibitory activity 3 isoform 1                                                                                                                                                         |
| XP_536156.2 | PREDICTED: similar to cytoplasmic FMR1 interacting protein 1                                                                                                                                                           |
| XP_536160.2 | PREDICTED: similar to hect domain and RLD 2 isoform 1                                                                                                                                                                  |
| XP_536165.1 | PREDICTED: similar to small nuclear ribonucleoparticle-associated protein isoform 4                                                                                                                                    |
| XP_536172.2 | PREDICTED: similar to threonyl-tRNA synthetase-like 2 isoform 1                                                                                                                                                        |
| XP_536176.1 | PREDICTED: similar to leucine rich repeat containing 28 isoform 1                                                                                                                                                      |
| XP_536182.2 | PREDICTED: similar to A-kinase anchor protein 13 isoform 2                                                                                                                                                             |
| XP_536184.2 | PREDICTED: similar to ATP/GTP binding protein 1                                                                                                                                                                        |
| XP_536192.2 | PREDICTED: similar to isocitrate dehydrogenase 2 (NADP+), mitochondrial                                                                                                                                                |
| XP_536199.2 | PREDICTED: similar to Ras GTPase-activating-like protein IQGAP1 (p195)                                                                                                                                                 |
| XP_536201.2 | PREDICTED: similar to alpha-kinase 3                                                                                                                                                                                   |
| XP_536202.2 | PREDICTED: similar to adaptor-related protein complex 3, beta 2 subunit isoform 1                                                                                                                                      |

|             |                                                                                                                                        |
|-------------|----------------------------------------------------------------------------------------------------------------------------------------|
| XP_536209.2 | PREDICTED: similar to ADAMTS-like 3                                                                                                    |
| XP_536213.2 | PREDICTED: similar to isocitrate dehydrogenase 3 (NAD+) alpha isoform 1                                                                |
| XP_536221.2 | PREDICTED: similar to Huntingtin (Huntingtons disease protein) (HD protein)                                                            |
| XP_536224.2 | PREDICTED: similar to Wolf-Hirschhorn syndrome candidate 1 protein isoform 1                                                           |
| XP_536226.2 | PREDICTED: similar to transforming acidic coiled coil 3                                                                                |
| XP_536228.2 | PREDICTED: similar to leucine aminopeptidase                                                                                           |
| XP_536229.2 | PREDICTED: similar to Dihydropteridine reductase (HDHPR) (Quinoid dihydropteridine reductase) isoform 2                                |
| XP_536230.2 | PREDICTED: similar to cytoplasmic beta-actin                                                                                           |
| XP_536232.2 | PREDICTED: similar to F-box and leucine-rich repeat protein 5 isoform 1                                                                |
| XP_536235.2 | PREDICTED: similar to T06D8.1a                                                                                                         |
| XP_536241.2 | PREDICTED: hypothetical protein XP_536241                                                                                              |
| XP_536242.1 | PREDICTED: similar to Cell growth regulating nucleolar protein isoform 1                                                               |
| XP_536245.2 | PREDICTED: similar to ubiquitin carboxy-terminal hydrolase L1                                                                          |
| XP_536248.2 | PREDICTED: similar to Nedd4 binding protein 2                                                                                          |
| XP_536255.1 | PREDICTED: similar to lipoic acid synthetase isoform 1 precursor isoform 1                                                             |
| XP_536257.1 | PREDICTED: similar to klotho beta like                                                                                                 |
| XP_536260.2 | PREDICTED: similar to WD repeat domain 19                                                                                              |
| XP_536264.2 | PREDICTED: hypothetical protein XP_536264                                                                                              |
| XP_536267.2 | PREDICTED: similar to Stromal interaction molecule 2 precursor                                                                         |
| XP_536271.2 | PREDICTED: similar to Zinc finger CCHC domain containing protein 4                                                                     |
| XP_536275.2 | PREDICTED: similar to potassium channel-interacting protein 4 isoform 1                                                                |
| XP_536279.2 | PREDICTED: similar to cyclin G associated kinase                                                                                       |
| XP_536283.2 | PREDICTED: similar to Polyposis locus protein 1 (TB2 protein)                                                                          |
| XP_536285.2 | PREDICTED: similar to Adenomatous polyposis coli protein (APC protein) isoform 1                                                       |
| XP_536286.2 | PREDICTED: similar to erythrocyte protein band 4.1-like 4                                                                              |
| XP_536289.2 | PREDICTED: similar to peptidylglycine alpha-amidating monooxygenase isoform a, preproprotein                                           |
| XP_536290.2 | PREDICTED: similar to RGM domain family, member B isoform 2 precursor                                                                  |
| XP_536294.2 | PREDICTED: similar to CG8777-PA                                                                                                        |
| XP_536295.2 | PREDICTED: similar to CG14085-PB, isoform B                                                                                            |
| XP_536297.2 | PREDICTED: similar to monogenic, audiogenic seizure susceptibility 1                                                                   |
| XP_536302.2 | PREDICTED: similar to Ras GTPase-activating protein 1 (GTPase-activating protein) (GAP) (Ras p21 protein activator) (p120GAP) (RasGAP) |
| XP_536307.2 | PREDICTED: similar to DNA mismatch repair protein Msh3 (Divergent upstream protein) (DUP) (Mismatch repair protein 1) (MRP1)           |
| XP_536310.2 | PREDICTED: similar to Zinc finger FYVE domain-containing protein 16 (Endofin) (Endosome-associated FYVE domain protein)                |
| XP_536312.2 | PREDICTED: similar to cardiomyopathy associated 5                                                                                      |
| XP_536314.2 | PREDICTED: similar to Secretory carrier-associated membrane protein 1 (Secretory carrier membrane protein 1) isoform 1                 |
| XP_536318.2 | PREDICTED: similar to Ras GTPase-activating-like protein IQGAP2                                                                        |

|             |                                                                                                                                                                                                                                                       |
|-------------|-------------------------------------------------------------------------------------------------------------------------------------------------------------------------------------------------------------------------------------------------------|
| XP_536320.2 | PREDICTED: hypothetical protein XP_536320                                                                                                                                                                                                             |
| XP_536321.2 | PREDICTED: similar to DNA polymerase kappa (DINB protein) (DINP) isoform 2                                                                                                                                                                            |
| XP_536323.2 | PREDICTED: similar to 3-hydroxy-3-methylglutaryl-coenzyme A reductase (HMG-CoA reductase) isoform 1                                                                                                                                                   |
| XP_536330.2 | PREDICTED: similar to Ryanodine receptor 2 (Cardiac muscle-type ryanodine receptor) (RyR2) (RyR-2) (Cardiac muscle ryanodine receptor-calcium release channel) (hRyR-2)                                                                               |
| XP_536332.2 | PREDICTED: similar to Methionine synthase (5-methyltetrahydrofolate--homocysteine methyltransferase) (Methionine synthase, vitamin-B12 dependent) (MS)                                                                                                |
| XP_536334.2 | PREDICTED: similar to Protein BAP28                                                                                                                                                                                                                   |
| XP_536337.2 | PREDICTED: similar to lysosomal trafficking regulator isoform 1                                                                                                                                                                                       |
| XP_536341.2 | PREDICTED: similar to RNA binding motif protein 34                                                                                                                                                                                                    |
| XP_536346.2 | PREDICTED: similar to Dihydroxyacetone phosphate acyltransferase (DHAP-AT) (DAP-AT) (Glycerone-phosphate O-acyltransferase) (Acyl-CoA: dihydroxyacetonephosphate acyltransferase)                                                                     |
| XP_536347.2 | PREDICTED: hypothetical protein XP_536347                                                                                                                                                                                                             |
| XP_536348.2 | PREDICTED: similar to Angiotensinogen precursor                                                                                                                                                                                                       |
| XP_536350.2 | PREDICTED: similar to Protein KIAA0133                                                                                                                                                                                                                |
| XP_536353.2 | PREDICTED: similar to RAB4A, member RAS oncogene family                                                                                                                                                                                               |
| XP_536355.1 | PREDICTED: similar to Protein C10orf70                                                                                                                                                                                                                |
| XP_536360.2 | PREDICTED: similar to pleckstrin homology domain containing, family K member 1                                                                                                                                                                        |
| XP_536363.2 | PREDICTED: similar to jumonji domain containing 1C isoform 1                                                                                                                                                                                          |
| XP_536371.2 | PREDICTED: similar to CXXC finger 6                                                                                                                                                                                                                   |
| XP_536372.2 | PREDICTED: similar to cell-cycle and apoptosis regulatory protein 1 isoform 1                                                                                                                                                                         |
| XP_536375.2 | PREDICTED: similar to vacuolar protein sorting 26 isoform 1                                                                                                                                                                                           |
| XP_536376.2 | PREDICTED: similar to Hexokinase, type I (HK I) (Brain form hexokinase)                                                                                                                                                                               |
| XP_536388.1 | PREDICTED: similar to annexin VII isoform 2 isoform 2                                                                                                                                                                                                 |
| XP_536389.1 | PREDICTED: similar to zinc finger, MYND domain containing 17                                                                                                                                                                                          |
| XP_536393.2 | PREDICTED: similar to CG32542-PA isoform 2                                                                                                                                                                                                            |
| XP_536395.2 | PREDICTED: similar to Vinculin (Metavinculin)                                                                                                                                                                                                         |
| XP_536397.2 | PREDICTED: similar to Histone acetyltransferase MYST4 (MYST protein 4) (MOZ, YBF2/SAS3, SAS2 and TIP60 protein 4) (Histone acetyltransferase MOZ2) (Monocytic leukemia zinc finger protein-related factor) (Histone acetyltransferase MORF) isoform 2 |
| XP_536399.2 | PREDICTED: similar to polymerase (RNA) III (DNA directed) polypeptide A, 155kDa                                                                                                                                                                       |
| XP_536401.2 | PREDICTED: similar to annexin A11 (predicted)                                                                                                                                                                                                         |
| XP_536403.1 | PREDICTED: similar to R53.5                                                                                                                                                                                                                           |
| XP_536407.1 | PREDICTED: similar to Kinesin-like protein KIF2C (Mitotic centromere-associated kinesin) (MCAK) (Kinesin-like protein 6)                                                                                                                              |
| XP_536422.2 | PREDICTED: similar to protocadherin LKC precursor                                                                                                                                                                                                     |
| XP_536435.2 | PREDICTED: similar to KIBRA protein                                                                                                                                                                                                                   |
| XP_536439.2 | PREDICTED: similar to methionine adenosyltransferase II, beta isoform 1                                                                                                                                                                               |
| XP_536444.2 | PREDICTED: similar to Ferritin light chain 1 (Ferritin L subunit 1)                                                                                                                                                                                   |
| XP_536446.2 | PREDICTED: similar to step II splicing factor SLU7                                                                                                                                                                                                    |

|             |                                                                                                                                                         |
|-------------|---------------------------------------------------------------------------------------------------------------------------------------------------------|
| XP_536451.2 | PREDICTED: similar to Epsin-4 (Epsin-related protein) (EpsinR) (Enthoprotin) (Clathrin interacting protein localized in the trans-Golgi region) (Clint) |
| XP_536454.2 | PREDICTED: similar to SRY-box containing gene 30 isoform 1                                                                                              |
| XP_536455.2 | PREDICTED: similar to p53 inducible protein                                                                                                             |
| XP_536461.2 | PREDICTED: similar to FAT tumor suppressor 2 precursor                                                                                                  |
| XP_536475.2 | PREDICTED: similar to Follistatin precursor (FS) (Activin-binding protein)                                                                              |
| XP_536477.2 | PREDICTED: similar to Pelota homolog                                                                                                                    |
| XP_536480.2 | PREDICTED: similar to Mitochondrial 28S ribosomal protein S30 (S30mt) (MRP-S30) (Programmed cell death protein 9)                                       |
| XP_536484.2 | PREDICTED: similar to putative transcription factor ZNF131 isoform 1                                                                                    |
| XP_536487.2 | PREDICTED: similar to 3-oxoacid CoA transferase 1                                                                                                       |
| XP_536488.2 | PREDICTED: similar to Complement component C6 precursor isoform 1                                                                                       |
| XP_536489.2 | PREDICTED: similar to complement component 6                                                                                                            |
| XP_536491.2 | PREDICTED: similar to protein kinase, AMP-activated, alpha 1 catalytic subunit isoform 2                                                                |
| XP_536492.2 | PREDICTED: similar to osmosis responsive factor [Canis familiaris]                                                                                      |
| XP_536494.2 | PREDICTED: similar to Complement component C9 precursor                                                                                                 |
| XP_536495.2 | PREDICTED: similar to FYN binding protein (FYB-120/130) isoform 1                                                                                       |
| XP_536496.2 | PREDICTED: similar to rapamycin-insensitive companion of mTOR                                                                                           |
| XP_536500.2 | PREDICTED: similar to nucleoporin 155kDa isoform 1                                                                                                      |
| XP_536501.2 | PREDICTED: hypothetical protein XP_536501                                                                                                               |
| XP_536508.2 | PREDICTED: similar to a disintegrin-like and metalloprotease with thrombospondin type 1 motif, 12                                                       |
| XP_536509.2 | PREDICTED: similar to threonyl-tRNA synthetase                                                                                                          |
| XP_536512.2 | PREDICTED: similar to PDZ domain containing 3 isoform a                                                                                                 |
| XP_536537.1 | PREDICTED: similar to neurogranin                                                                                                                       |
| XP_536543.1 | PREDICTED: similar to Heat shock cognate 71 kDa protein (Heat shock 70 kDa protein 8) isoform 1                                                         |
| XP_536545.2 | PREDICTED: similar to sortilin-related receptor containing LDLR class A repeats preproprotein                                                           |
| XP_536546.2 | PREDICTED: similar to Rho guanine nucleotide exchange factor 12 (Leukemia-associated RhoGEF)                                                            |
| XP_536547.2 | PREDICTED: similar to 150 kDa oxygen-regulated protein precursor (Orp150) (Hypoxia up-regulated 1)                                                      |
| XP_536549.2 | PREDICTED: similar to 40S ribosomal protein S25                                                                                                         |
| XP_536554.2 | PREDICTED: similar to myeloid/lymphoid or mixed-lineage leukemia (trithorax homolog, Drosophila)                                                        |
| XP_536559.2 | PREDICTED: hypothetical protein XP_536559                                                                                                               |
| XP_536562.2 | PREDICTED: similar to platelet-activating factor acetylhydrolase, isoform Ib, beta subunit 30kDa                                                        |
| XP_536564.2 | PREDICTED: similar to Apolipoprotein A-I precursor (Apo-AI) (ApoA-I)                                                                                    |
| XP_536572.2 | PREDICTED: similar to Beta,beta-carotene 9,10-dioxygenase (Beta-carotene dioxygenase 2) (B-diox-II)                                                     |
| XP_536575.1 | PREDICTED: similar to CG5792-PA, isoform A                                                                                                              |
| XP_536589.2 | PREDICTED: similar to CWF19-like 2, cell cycle control                                                                                                  |
| XP_536607.1 | PREDICTED: similar to Mitochondrial 2-oxoglutarate/malate carrier protein (OGCP) isoform 1                                                              |
| XP_536611.1 | PREDICTED: similar to transmembrane 4 superfamily member 5                                                                                              |

|             |                                                                                                                                                                     |
|-------------|---------------------------------------------------------------------------------------------------------------------------------------------------------------------|
| XP_536612.2 | PREDICTED: similar to proline-, glutamic acid-, leucine-rich protein 1                                                                                              |
| XP_536621.2 | PREDICTED: similar to DNA-directed RNA polymerase II largest subunit (RPB1) isoform 1                                                                               |
| XP_536627.2 | PREDICTED: similar to chromodomain helicase DNA binding protein 3 isoform 3                                                                                         |
| XP_536632.2 | PREDICTED: hypothetical protein XP_536632                                                                                                                           |
| XP_536638.2 | PREDICTED: similar to syntaxin 8 isoform 1                                                                                                                          |
| XP_536652.1 | PREDICTED: similar to N-acetylglucosaminyl-phosphatidylinositol de-N-acetylase (Phosphatidylinositol-glycan biosynthesis, class L protein) (PIG-L)                  |
| XP_536657.2 | PREDICTED: similar to B9 protein                                                                                                                                    |
| XP_536659.2 | PREDICTED: similar to Flightless-I protein homolog                                                                                                                  |
| XP_536660.2 | PREDICTED: similar to myosin XV                                                                                                                                     |
| XP_536677.2 | PREDICTED: similar to SH3-domain GRB2-like (endophilin) interacting protein 1                                                                                       |
| XP_536686.1 | PREDICTED: similar to Angiotensinogen-related protein 3 precursor (Angiotensinogen-like 3) (Angiotensin-5) (ANG-5)                                                  |
| XP_536687.2 | PREDICTED: similar to dedicator of cytokinesis 7                                                                                                                    |
| XP_536697.2 | PREDICTED: similar to Ubiquitin carboxyl-terminal hydrolase 24 (Ubiquitin thioesterase 24) (Ubiquitin-specific processing protease 24) (Deubiquitinating enzyme 24) |
| XP_536718.2 | PREDICTED: similar to pantothenate kinase 4                                                                                                                         |
| XP_536727.2 | PREDICTED: similar to Cytosolic acyl coenzyme A thioester hydrolase (Long chain acyl-CoA thioester hydrolase) (CTE-II) (CTE-IIa) (Brain acyl-CoA hydrolase)         |
| XP_536728.2 | PREDICTED: similar to neuronal RhoA GEF protein                                                                                                                     |
| XP_536737.2 | PREDICTED: similar to mitochondrial carrier protein MGC4399                                                                                                         |
| XP_536738.2 | PREDICTED: similar to calyculin 1 isoform 2                                                                                                                         |
| XP_536747.2 | PREDICTED: similar to 3-hydroxyisobutyrate dehydrogenase, mitochondrial precursor (HIBADH) isoform 1                                                                |
| XP_536754.2 | PREDICTED: similar to CG10189-PA isoform 1                                                                                                                          |
| XP_536755.2 | PREDICTED: similar to BTG3 associated nuclear protein isoform b                                                                                                     |
| XP_536759.1 | PREDICTED: similar to Cytochrome c oxidase subunit IV isoform 1, mitochondrial precursor (COX IV-1) (Cytochrome c oxidase polypeptide IV)                           |
| XP_536760.2 | PREDICTED: similar to Neighbor of COX4                                                                                                                              |
| XP_536761.2 | PREDICTED: similar to Ubiquitin carboxyl-terminal hydrolase 10 (Ubiquitin thioesterase 10) (Ubiquitin-specific processing protease 10) (Deubiquitinating enzyme 10) |
| XP_536775.2 | PREDICTED: similar to Contactin-associated protein-like 4 precursor (Cell recognition molecule Caspr4)                                                              |
| XP_536787.2 | PREDICTED: similar to pyruvate dehydrogenase phosphatase regulatory subunit                                                                                         |
| XP_536790.2 | PREDICTED: similar to DDX19-like protein isoform 1                                                                                                                  |
| XP_536801.2 | PREDICTED: similar to polyamine modulated factor 1 binding protein 1                                                                                                |
| XP_536806.2 | PREDICTED: similar to Beta-2-syntrophin (59 kDa dystrophin-associated protein A1, basic component 2) (Syntrophin 3) (SNT3) (Syntrophin-like) (SNTL)                 |
| XP_536816.2 | PREDICTED: similar to ATPase, H <sup>+</sup> transporting, lysosomal, V0 subunit D isoform 1 isoform 1                                                              |
| XP_536817.2 | PREDICTED: similar to zinc finger, DHHC domain containing 1                                                                                                         |
| XP_536819.2 | PREDICTED: similar to leucine rich repeat containing 36                                                                                                             |
| XP_536823.2 | PREDICTED: similar to Dynein light intermediate chain 2, cytosolic (LIC53/55) (LIC-2)                                                                               |
| XP_536828.1 | PREDICTED: similar to NipSnap2 protein (Glioblastoma amplified sequence) isoform 1                                                                                  |
| XP_536834.2 | PREDICTED: similar to RAB guanine nucleotide exchange factor (GEF) 1 isoform 1                                                                                      |
| XP_536837.2 | PREDICTED: hypothetical protein XP_536837                                                                                                                           |

|             |                                                                                                                                                                                |
|-------------|--------------------------------------------------------------------------------------------------------------------------------------------------------------------------------|
| XP_536845.2 | PREDICTED: similar to bromodomain adjacent to zinc finger domain, 1B                                                                                                           |
| XP_536847.2 | PREDICTED: similar to transmembrane protein induced by tumor necrosis factor alpha                                                                                             |
| XP_536859.1 | PREDICTED: similar to thyroid hormone receptor interactor 6 isoform 1                                                                                                          |
| XP_536869.2 | PREDICTED: similar to zinc finger protein 99                                                                                                                                   |
| XP_536872.1 | PREDICTED: similar to Actin-related protein 2/3 complex subunit 1B (ARP2/3 complex 41 kDa subunit) (p41-ARC) isoform 1                                                         |
| XP_536879.2 | PREDICTED: similar to PMS1 protein homolog 2 (DNA mismatch repair protein PMS2)                                                                                                |
| XP_536882.2 | PREDICTED: similar to Ubiquitin carboxyl-terminal hydrolase 42 (Ubiquitin thiolesterase 42) (Ubiquitin-specific processing protease 42) (Deubiquitinating enzyme 42) isoform 1 |
| XP_536889.2 | PREDICTED: similar to membrane-associated guanylate kinase-related (MAGI-3)                                                                                                    |
| XP_536894.2 | PREDICTED: similar to Eukaryotic translation initiation factor 3 subunit 9 (eIF-3 eta) (eIF3 p116) (eIF3 p110) (eIF3b) isoform 1                                               |
| XP_536900.2 | PREDICTED: similar to Snf2-related CBP activator protein                                                                                                                       |
| XP_536908.2 | PREDICTED: similar to Leukosialin precursor (Leucocyte sialoglycoprotein) (Sialophorin) (CD43 antigen) (Galactoglycoprotein) (GALGP)                                           |
| XP_536923.2 | PREDICTED: similar to eukaryotic translation initiation factor 3, subunit 8, 110kDa                                                                                            |
| XP_536924.2 | PREDICTED: similar to Tu translation elongation factor, mitochondrial                                                                                                          |
| XP_536925.2 | PREDICTED: similar to ATPase, Ca++ transporting, cardiac muscle, fast twitch 1 isoform 1                                                                                       |
| XP_536926.2 | PREDICTED: similar to exportin 6 isoform 1                                                                                                                                     |
| XP_536927.2 | PREDICTED: similar to K04F10.2                                                                                                                                                 |
| XP_536929.2 | PREDICTED: similar to retinoblastoma-binding protein 6 isoform 2 isoform 1                                                                                                     |
| XP_536933.1 | PREDICTED: similar to ubiquitin-binding protein homolog isoform 1                                                                                                              |
| XP_536935.2 | PREDICTED: similar to Conserved oligomeric Golgi complex component 7                                                                                                           |
| XP_536942.1 | PREDICTED: similar to Ubiquinol-cytochrome-c reductase complex core protein 2, mitochondrial precursor (Complex III subunit II) isoform 1                                      |
| XP_536950.2 | PREDICTED: similar to G-protein coupled receptor family C group 5 member B precursor (Retinoic acid induced gene 2 protein) (RAIG-2) (A-69G12.1)                               |
| XP_536972.2 | PREDICTED: similar to Ribosomal L1 domain containing protein 1 (Cellular senescence inhibited gene protein) (PBK1 protein) (CATX-11)                                           |
| XP_536991.2 | PREDICTED: similar to CREB binding protein isoform 1                                                                                                                           |
| XP_536995.2 | PREDICTED: similar to zinc finger protein 205 isoform 2                                                                                                                        |
| XP_537003.2 | PREDICTED: similar to netrin 2-like                                                                                                                                            |
| XP_537004.2 | PREDICTED: similar to ATP-binding cassette, sub-family A member 3                                                                                                              |
| XP_537013.2 | PREDICTED: similar to hydroxyacyl glutathione hydrolase                                                                                                                        |
| XP_537016.2 | PREDICTED: similar to Voltage-dependent T-type calcium channel alpha-1H subunit (Voltage-gated calcium channel alpha subunit Cav3.2)                                           |
| XP_537020.2 | PREDICTED: similar to katanin p80 (WD40-containing) subunit B 1                                                                                                                |
| XP_537027.2 | PREDICTED: similar to ATP synthase B chain, mitochondrial precursor                                                                                                            |
| XP_537032.2 | PREDICTED: similar to receptor-interacting factor 1 isoform 1 isoform 1                                                                                                        |
| XP_537042.2 | PREDICTED: similar to cadherin EGF LAG seven-pass G-type receptor 2 isoform 1                                                                                                  |
| XP_537043.2 | PREDICTED: similar to Y73F8A.5                                                                                                                                                 |
| XP_537044.2 | PREDICTED: similar to Mid-1-related chloride channel 1 isoform 1                                                                                                               |
| XP_537047.2 | PREDICTED: similar to Vav-3 protein                                                                                                                                            |



|             |                                                                                                                                                                                                                                                                                                                                        |
|-------------|----------------------------------------------------------------------------------------------------------------------------------------------------------------------------------------------------------------------------------------------------------------------------------------------------------------------------------------|
| XP_537050.2 | PREDICTED: similar to zinc transporter like 2                                                                                                                                                                                                                                                                                          |
| XP_537056.2 | PREDICTED: similar to CG18048-PA                                                                                                                                                                                                                                                                                                       |
| XP_537058.2 | PREDICTED: similar to ubiquitin-conjugating enzyme E2N                                                                                                                                                                                                                                                                                 |
| XP_537061.2 | PREDICTED: similar to Dihydropyrimidine dehydrogenase [NADP+] precursor (DPD) (DHPDHase) (Dihydrouracil dehydrogenase) (Dihydrothymine dehydrogenase)                                                                                                                                                                                  |
| XP_537064.2 | PREDICTED: similar to ATP-binding cassette, sub-family D, member 3 (70 kDa peroxisomal membrane protein) (PMP70)                                                                                                                                                                                                                       |
| XP_537065.1 | PREDICTED: similar to PTPL1-associated RhoGAP 1 isoform 1                                                                                                                                                                                                                                                                              |
| XP_537067.2 | PREDICTED: similar to formin binding protein 1-like isoform 2                                                                                                                                                                                                                                                                          |
| XP_537071.2 | PREDICTED: similar to sarcoma antigen NY-SAR-41                                                                                                                                                                                                                                                                                        |
| XP_537074.2 | PREDICTED: similar to 60S ribosomal protein L5 isoform 1                                                                                                                                                                                                                                                                               |
| XP_537076.2 | PREDICTED: similar to glomulin isoform FAP68                                                                                                                                                                                                                                                                                           |
| XP_537078.1 | PREDICTED: hypothetical protein XP_537078                                                                                                                                                                                                                                                                                              |
| XP_537081.2 | PREDICTED: similar to CG5205-PA                                                                                                                                                                                                                                                                                                        |
| XP_537085.1 | PREDICTED: similar to Transcription initiation factor IIB (General transcription factor TFIIB) (S300-II) isoform 1                                                                                                                                                                                                                     |
| XP_537089.2 | PREDICTED: similar to collagen, type XXIV, alpha 1                                                                                                                                                                                                                                                                                     |
| XP_537091.2 | PREDICTED: similar to CYR61 protein precursor (Cysteine-rich, angiogenic inducer, 61) (Insulin-like growth factor-binding protein 10) (GIG1 protein)                                                                                                                                                                                   |
| XP_537096.1 | PREDICTED: similar to RNA processing factor 1                                                                                                                                                                                                                                                                                          |
| XP_537104.2 | PREDICTED: similar to histocompatibility 28                                                                                                                                                                                                                                                                                            |
| XP_537111.2 | PREDICTED: hypothetical protein XP_537111                                                                                                                                                                                                                                                                                              |
| XP_537124.2 | PREDICTED: similar to Mitochondrial import inner membrane translocase subunit Tim17 A (Inner membrane preprotein translocase Tim17a) isoform 1                                                                                                                                                                                         |
| XP_537128.2 | PREDICTED: similar to DEAD (Asp-Glu-Ala-Asp) box polypeptide 59 isoform 2 isoform 1                                                                                                                                                                                                                                                    |
| XP_537129.2 | PREDICTED: similar to NIMA (never in mitosis gene a)-related kinase 7 isoform 1                                                                                                                                                                                                                                                        |
| XP_537133.2 | PREDICTED: similar to Polymeric-immunoglobulin receptor precursor (Poly-Ig receptor) (PIGR)                                                                                                                                                                                                                                            |
| XP_537151.2 | PREDICTED: similar to centrosome-associated protein 350 isoform 1                                                                                                                                                                                                                                                                      |
| XP_537163.2 | PREDICTED: similar to niban protein isoform 2                                                                                                                                                                                                                                                                                          |
| XP_537167.2 | PREDICTED: similar to Nucleoprotein TPR                                                                                                                                                                                                                                                                                                |
| XP_537174.2 | PREDICTED: similar to v-abl Abelson murine leukemia viral oncogene homolog 2 isoform a isoform 1                                                                                                                                                                                                                                       |
| XP_537179.2 | PREDICTED: similar to Pappalysin-2 precursor (Pregnancy-associated plasma protein-A2) (PAPP-A2) (Pregnancy-associated plasma protein-E1) (PAPP-E)                                                                                                                                                                                      |
| XP_537181.2 | PREDICTED: similar to constitutive photomorphogenic protein 1                                                                                                                                                                                                                                                                          |
| XP_537185.2 | PREDICTED: similar to RAB GTPase activating protein 1-like isoform 1                                                                                                                                                                                                                                                                   |
| XP_537189.2 | PREDICTED: similar to sperm-specific sodium proton exchanger<br>PREDICTED: similar to Peroxiredoxin 6 (Antioxidant protein 2) (1-Cys peroxiredoxin) (1-Cys PRX) (Acidic calcium-independent phospholipase A2) (aiPLA2) (Non-selenium glutathione peroxidase) (NSGPx) (24 kDa protein) (Liver 2D page spot 40) (Red blood cells page... |
| XP_537190.2 |                                                                                                                                                                                                                                                                                                                                        |
| XP_537196.2 | PREDICTED: similar to HBxAg transactivated protein 2 isoform 1                                                                                                                                                                                                                                                                         |
| XP_537202.2 | PREDICTED: similar to P-selectin precursor (Granule membrane protein 140) (GMP-140) (PADGEM) (CD62P) (Leukocyte-endothelial cell adhesion molecule 3) (LECAM3)                                                                                                                                                                         |
| XP_537209.1 | PREDICTED: similar to Brain protein 44                                                                                                                                                                                                                                                                                                 |
| XP_537210.1 | PREDICTED: similar to soluble adenylyl cyclase                                                                                                                                                                                                                                                                                         |

|             |                                                                                                                                                |
|-------------|------------------------------------------------------------------------------------------------------------------------------------------------|
| XP_537212.2 | PREDICTED: similar to protein kinase substrate MK2S4                                                                                           |
| XP_537215.1 | PREDICTED: similar to Fumarate hydratase, mitochondrial precursor (Fumarase) isoform 1                                                         |
| XP_537218.2 | PREDICTED: similar to KARP-1-binding protein isoform 1                                                                                         |
| XP_537222.2 | PREDICTED: similar to heterogeneous nuclear ribonucleoprotein U isoform b isoform 1                                                            |
| XP_537224.2 | PREDICTED: similar to transcription factor B2, mitochondrial isoform 1                                                                         |
| XP_537227.2 | PREDICTED: similar to saccharopine dehydrogenase (putative)                                                                                    |
| XP_537228.2 | PREDICTED: similar to transcription factor ELYS                                                                                                |
| XP_537234.2 | PREDICTED: similar to pyrroline-5-carboxylate reductase family, member 2 (predicted)                                                           |
| XP_537236.2 | PREDICTED: similar to dynein, axonemal, heavy chain 11                                                                                         |
| XP_537239.2 | PREDICTED: similar to Nuclear valosin-containing protein-like (Nuclear VCP-like protein) (NVLp)                                                |
| XP_537241.2 | PREDICTED: similar to ETS translocation variant 3 (ETS-domain transcriptional repressor PE1) (PE-1) (Mitogenic Ets transcriptional suppressor) |
| XP_537245.2 | PREDICTED: similar to chaperonin containing TCP1, subunit 3 (gamma) isoform 1                                                                  |
| XP_537249.2 | PREDICTED: similar to GTP-binding protein Rit1 (Ras-like protein expressed in many tissues) (Ras-like without CAAX protein 1)                  |
| XP_537250.1 | PREDICTED: similar to death-associated protein 3                                                                                               |
| XP_537252.2 | PREDICTED: similar to farnesyl diphosphate synthase                                                                                            |
| XP_537253.2 | PREDICTED: similar to metaxin 1 isoform 1                                                                                                      |
| XP_537257.2 | PREDICTED: similar to pre-B-cell leukemia transcription factor interacting protein 1                                                           |
| XP_537261.2 | PREDICTED: similar to Tropomyosin alpha 3 chain (Tropomyosin 3) (Tropomyosin gamma) (hTM5) isoform 1                                           |
| XP_537262.2 | PREDICTED: similar to c-myc promoter binding protein                                                                                           |
| XP_537263.1 | PREDICTED: similar to interleukin enhancer binding factor 2 isoform 1                                                                          |
| XP_537273.2 | PREDICTED: similar to ATP synthase alpha chain, mitochondrial precursor isoform 1                                                              |
| XP_537280.2 | PREDICTED: similar to formin homology 2 domain containing 3                                                                                    |
| XP_537294.2 | PREDICTED: similar to potassium channel tetramerisation domain containing 1                                                                    |
| XP_537296.2 | PREDICTED: hypothetical protein XP_537296                                                                                                      |
| XP_537297.2 | PREDICTED: similar to laminin alpha 3 subunit isoform 1                                                                                        |
| XP_537298.2 | PREDICTED: similar to sudD suppressor of bimD6 homolog isoform 1 isoform 1                                                                     |
| XP_537305.2 | PREDICTED: similar to Rho-associated protein kinase 1 (Rho-associated, coiled-coil containing protein kinase 1) (p160 ROCK-1) (p160ROCK)       |
| XP_537313.2 | PREDICTED: similar to kinetochore associated 2                                                                                                 |
| XP_537314.2 | PREDICTED: similar to myomesin 1 isoform 2                                                                                                     |
| XP_537321.2 | PREDICTED: similar to Band 4.1-like protein 3 (4.1B) (Differentially expressed in adenocarcinoma of the lung protein 1) (DAL-1) isoform 1      |
| XP_537324.2 | PREDICTED: similar to laminin, alpha 1 precursor                                                                                               |
| XP_537329.2 | PREDICTED: similar to ankyrin repeat domain 12 isoform 1                                                                                       |
| XP_537332.1 | PREDICTED: similar to vesicle-associated membrane protein-associated protein A isoform 1 isoform 1                                             |
| XP_537341.2 | PREDICTED: hypothetical protein XP_537341                                                                                                      |
| XP_537343.2 | PREDICTED: similar to methyl-CpG binding domain protein 1 isoform 1                                                                            |
| XP_537345.2 | PREDICTED: similar to Myosin-5B (Myosin Vb)                                                                                                    |

|             |                                                                                                                                                                                                                                                                                                                                                                                                                                                     |
|-------------|-----------------------------------------------------------------------------------------------------------------------------------------------------------------------------------------------------------------------------------------------------------------------------------------------------------------------------------------------------------------------------------------------------------------------------------------------------|
| XP_537351.2 | PREDICTED: similar to thyroid hormone receptor interactor 11                                                                                                                                                                                                                                                                                                                                                                                        |
| XP_537368.2 | PREDICTED: similar to ajuba homolog isoform 1                                                                                                                                                                                                                                                                                                                                                                                                       |
| XP_537374.2 | PREDICTED: similar to embryonal Fyn-associated substrate isoform 1                                                                                                                                                                                                                                                                                                                                                                                  |
| XP_537380.1 | PREDICTED: similar to Proteasome activator complex subunit 1 (Proteasome activator 28-alpha subunit) (PA28alpha) (PA28a) (Activator of multicatalytic protease subunit 1) (11S regulator complex alpha subunit) (REG-alpha) (Interferon gamma up-regulated I-5111 p...                                                                                                                                                                              |
| XP_537381.2 | PREDICTED: similar to Hypothetical UPF0172 protein CG3501                                                                                                                                                                                                                                                                                                                                                                                           |
| XP_537387.1 | PREDICTED: similar to chromatin modifying protein 4A                                                                                                                                                                                                                                                                                                                                                                                                |
| XP_537389.2 | PREDICTED: similar to neural precursor cell expressed, developmentally down-regulated gene 8                                                                                                                                                                                                                                                                                                                                                        |
| XP_537390.2 | PREDICTED: similar to GMP reductase 2 (Guanosine 5-monophosphate oxidoreductase 2) (Guanosine monophosphate reductase 2) isoform 1                                                                                                                                                                                                                                                                                                                  |
| XP_537393.2 | PREDICTED: similar to dehydrogenase/reductase (SDR family) member 1                                                                                                                                                                                                                                                                                                                                                                                 |
| XP_537399.1 | PREDICTED: similar to 40S ribosomal protein S4, X isoform                                                                                                                                                                                                                                                                                                                                                                                           |
| XP_537403.2 | PREDICTED: similar to vesicle transport-related protein isoform a                                                                                                                                                                                                                                                                                                                                                                                   |
| XP_537404.2 | PREDICTED: similar to nuclear autoantigen                                                                                                                                                                                                                                                                                                                                                                                                           |
| XP_537408.2 | PREDICTED: similar to Egl nine homolog 3, mitochondrial precursor (Hypoxia inducible factor prolyl hydroxylase 3) (HIF-prolyl hydroxylase 3) (HIF-PH3) (SM-20)                                                                                                                                                                                                                                                                                      |
| XP_537420.2 | PREDICTED: similar to melanoma inhibitory activity 2                                                                                                                                                                                                                                                                                                                                                                                                |
| XP_537423.2 | PREDICTED: similar to LINE-1 reverse transcriptase homolog                                                                                                                                                                                                                                                                                                                                                                                          |
| XP_537426.2 | PREDICTED: similar to eukaryotic translation elongation factor 1 alpha 1 isoform 1                                                                                                                                                                                                                                                                                                                                                                  |
| XP_537432.2 | PREDICTED: similar to MAM domain containing protein 1 precursor (MAM domain-containing glycosylphosphatidylinositol anchor protein 2)                                                                                                                                                                                                                                                                                                               |
| XP_537435.2 | PREDICTED: similar to Protein C14orf104                                                                                                                                                                                                                                                                                                                                                                                                             |
| XP_537443.2 | PREDICTED: similar to liver glycogen phosphorylase isoform 1                                                                                                                                                                                                                                                                                                                                                                                        |
| XP_537445.2 | PREDICTED: similar to nidogen 2                                                                                                                                                                                                                                                                                                                                                                                                                     |
| XP_537446.2 | PREDICTED: similar to Protein disulfide-isomerase precursor (PDI) (Prolyl 4-hydroxylase beta subunit) (Cellular thyroid hormone binding protein)                                                                                                                                                                                                                                                                                                    |
| XP_537449.2 | PREDICTED: similar to Probable phospholipase DDHD1 (DDHD domain protein 1) (Phosphatidic acid-preferring phospholipase A1 homolog) (PA-PLA1) isoform 1                                                                                                                                                                                                                                                                                              |
| XP_537455.2 | PREDICTED: similar to kinectin 1                                                                                                                                                                                                                                                                                                                                                                                                                    |
| XP_537461.2 | PREDICTED: similar to retinoblastoma-binding protein 1 isoform I isoform 1                                                                                                                                                                                                                                                                                                                                                                          |
| XP_537462.2 | PREDICTED: similar to Protein KIAA0586                                                                                                                                                                                                                                                                                                                                                                                                              |
| XP_537465.2 | PREDICTED: similar to Dehydrogenase/reductase SDR family member 7 precursor (Retinal short-chain dehydrogenase/reductase 4) (retSDR4)<br>PREDICTED: similar to CDK-activating kinase assembly factor MAT1 (RING finger protein MAT1) (Menage a trois) (CDK7/cyclin H assembly factor) (p36) (p35) (Cyclin G1 interacting protein) (RING finger protein 66) isoform 1                                                                                |
| XP_537469.1 |                                                                                                                                                                                                                                                                                                                                                                                                                                                     |
| XP_537473.2 | PREDICTED: similar to estrogen receptor 2 isoform 2 isoform 1                                                                                                                                                                                                                                                                                                                                                                                       |
| XP_537475.2 | PREDICTED: similar to testis expressed gene 21                                                                                                                                                                                                                                                                                                                                                                                                      |
| XP_537476.2 | PREDICTED: similar to C-1-tetrahydrofolate synthase, cytoplasmic (C1-THF synthase)                                                                                                                                                                                                                                                                                                                                                                  |
| XP_537479.1 | PREDICTED: similar to heat shock protein 2 isoform 1                                                                                                                                                                                                                                                                                                                                                                                                |
| XP_537485.1 | PREDICTED: similar to Eukaryotic translation initiation factor 2 subunit 1 (Eukaryotic translation initiation factor 2 alpha subunit) (eIF-2-alpha) (EIF-2alpha) (EIF-2A)<br>PREDICTED: similar to Putative polypeptide N-acetylgalactosaminyltransferase-like protein 1 (Protein-UDP acetylgalactosaminyltransferase-like protein 1) (UDP-GalNAc:polypeptide N-acetylgalactosaminyltransferase-like protein 1) (Polypeptide GalNAc transferase-... |
| XP_537492.2 |                                                                                                                                                                                                                                                                                                                                                                                                                                                     |
| XP_537500.2 | PREDICTED: similar to a disintegrin and metalloproteinase domain 21 preproprotein                                                                                                                                                                                                                                                                                                                                                                   |

|             |                                                                                                                                                                                                                                                                            |
|-------------|----------------------------------------------------------------------------------------------------------------------------------------------------------------------------------------------------------------------------------------------------------------------------|
| XP_537501.2 | PREDICTED: similar to pecanex homolog                                                                                                                                                                                                                                      |
| XP_537503.2 | PREDICTED: similar to regulator of G-protein signaling 6                                                                                                                                                                                                                   |
| XP_537509.2 | PREDICTED: similar to YLP motif containing protein 1 (Nuclear protein ZAP3) (ZAP113) isoform 1                                                                                                                                                                             |
| XP_537511.2 | PREDICTED: similar to DNA mismatch repair protein Mlh3 (MutL protein homolog 3) isoform 1                                                                                                                                                                                  |
| XP_537513.2 | PREDICTED: similar to CG10999-PC, isoform C                                                                                                                                                                                                                                |
| XP_537522.1 | PREDICTED: similar to Muscle M-line assembly protein unc-89 (Uncoordinated protein 89)                                                                                                                                                                                     |
| XP_537532.2 | PREDICTED: similar to Spermatogenesis associated protein 7 (Spermatogenesis associated protein HSD3) (HSD-3.1) isoform 1                                                                                                                                                   |
| XP_537538.2 | PREDICTED: similar to tetratricopeptide repeat domain 7B                                                                                                                                                                                                                   |
| XP_537539.2 | PREDICTED: similar to DVL-binding protein DAPLE                                                                                                                                                                                                                            |
| XP_537541.2 | PREDICTED: similar to OTU domain, ubiquitin aldehyde binding 2                                                                                                                                                                                                             |
| XP_537542.2 | PREDICTED: similar to ATP-dependent RNA helicase DDX24 (DEAD-box protein 24)                                                                                                                                                                                               |
| XP_537547.2 | PREDICTED: similar to dicer1 isoform 1                                                                                                                                                                                                                                     |
| XP_537549.2 | PREDICTED: similar to Protein C14orf103 homolog                                                                                                                                                                                                                            |
| XP_537551.2 | PREDICTED: similar to poly(A) polymerase alpha                                                                                                                                                                                                                             |
| XP_537553.2 | PREDICTED: similar to Enah/Vasp-like                                                                                                                                                                                                                                       |
| XP_537556.2 | PREDICTED: similar to dynein, cytoplasmic, heavy polypeptide 1 isoform 1                                                                                                                                                                                                   |
| XP_537557.2 | PREDICTED: similar to heat shock protein 1, alpha isoform 1                                                                                                                                                                                                                |
| XP_537561.2 | PREDICTED: similar to Creatine kinase B-type (Creatine kinase, B chain) (B-CK) isoform 1                                                                                                                                                                                   |
| XP_537568.2 | PREDICTED: similar to Metastasis-associated protein MTA1                                                                                                                                                                                                                   |
| XP_537586.2 | PREDICTED: similar to fetal Alzheimer antigen isoform 2                                                                                                                                                                                                                    |
| XP_537590.2 | PREDICTED: similar to CG32662-PA                                                                                                                                                                                                                                           |
| XP_537594.2 | PREDICTED: similar to Intercellular adhesion molecule-2 precursor (ICAM-2) (CD102 antigen)                                                                                                                                                                                 |
| XP_537617.2 | PREDICTED: similar to CG9586-PB                                                                                                                                                                                                                                            |
| XP_537619.2 | PREDICTED: hypothetical protein XP_537619 isoform 1                                                                                                                                                                                                                        |
| XP_537621.2 | PREDICTED: similar to Rap2 interacting protein                                                                                                                                                                                                                             |
| XP_537624.2 | PREDICTED: similar to Dual specificity protein phosphatase 3 (Dual specificity protein phosphatase VHR)                                                                                                                                                                    |
| XP_537630.2 | PREDICTED: similar to CG10802-PA                                                                                                                                                                                                                                           |
| XP_537640.2 | PREDICTED: similar to kelch-like 11                                                                                                                                                                                                                                        |
| XP_537645.2 | PREDICTED: similar to SWI/SNF-related matrix-associated actin-dependent regulator of chromatin e1 isoform 1                                                                                                                                                                |
| XP_537649.2 | PREDICTED: similar to cancer susceptibility candidate 3 isoform 1                                                                                                                                                                                                          |
| XP_537654.2 | PREDICTED: similar to Peroxisome proliferator-activated receptor binding protein (PBP) (PPAR binding protein) (Thyroid hormone receptor-associated protein complex 220 kDa component) (Trap220) (Thyroid receptor interacting protein 2) (TRIP2) (p53 regulatory pr... iso |
| XP_537659.2 | PREDICTED: similar to aminopeptidase puromycin sensitive                                                                                                                                                                                                                   |
| XP_537674.2 | PREDICTED: similar to Myc-binding protein-associated protein                                                                                                                                                                                                               |
| XP_537694.2 | PREDICTED: similar to testis expressed sequence 14 isoform a                                                                                                                                                                                                               |
| XP_537704.2 | PREDICTED: similar to Thyroid hormone receptor-associated protein complex 240 kDa component (Trap240) (Thyroid hormone receptor associated protein 1) (Vitamin D3                                                                                                          |

|             |                                                                                                                                                                                                                                                                                                                                                    |
|-------------|----------------------------------------------------------------------------------------------------------------------------------------------------------------------------------------------------------------------------------------------------------------------------------------------------------------------------------------------------|
|             | receptor-interacting protein complex component DRIP250) (DRIP 250) (Activator-recruited cofactor ...                                                                                                                                                                                                                                               |
| XP_537710.2 | PREDICTED: similar to ubiquitin specific protease 32 isoform 1                                                                                                                                                                                                                                                                                     |
| XP_537718.2 | PREDICTED: similar to CG16989-PA                                                                                                                                                                                                                                                                                                                   |
| XP_537725.2 | PREDICTED: similar to Adapter-related protein complex 2 beta 1 subunit (Beta-adaptin) (Plasma membrane adaptor HA2/AP2 adaptin beta subunit) (Clathrin assembly protein complex 2 beta large chain) (AP105B) isoform 2                                                                                                                             |
| XP_537734.2 | PREDICTED: similar to ring finger protein 135 isoform 1                                                                                                                                                                                                                                                                                            |
| XP_537738.2 | PREDICTED: similar to Neurofibromin (Neurofibromatosis-related protein NF-1)                                                                                                                                                                                                                                                                       |
| XP_537754.2 | PREDICTED: hypothetical protein XP_537754                                                                                                                                                                                                                                                                                                          |
| XP_537755.2 | PREDICTED: similar to Bleomycin hydrolase (BLM hydrolase) (BMH) (BH)                                                                                                                                                                                                                                                                               |
| XP_537759.2 | PREDICTED: similar to CG1532-PA isoform 1                                                                                                                                                                                                                                                                                                          |
| XP_537762.2 | PREDICTED: hypothetical protein XP_537762                                                                                                                                                                                                                                                                                                          |
| XP_537765.2 | PREDICTED: similar to myosin IC                                                                                                                                                                                                                                                                                                                    |
| XP_537766.2 | PREDICTED: similar to skeletal muscle and kidney enriched inositol phosphatase isoform 1                                                                                                                                                                                                                                                           |
| XP_537767.2 | PREDICTED: similar to Phosphatidylinositol transfer protein alpha isoform (PtdIns transfer protein alpha) (PtdInsTP) (PI-TP-alpha)                                                                                                                                                                                                                 |
| XP_537778.2 | PREDICTED: similar to integrin, alpha E (antigen CD103, human mucosal lymphocyte antigen 1; alpha polypeptide)<br>PREDICTED: similar to Voltage-dependent N-type calcium channel alpha-1B subunit (Voltage-gated calcium channel alpha subunit Cav2.2) (Calcium channel, L type, alpha-1 polypeptide isoform 5) (Brain calcium channel III) (BIII) |
| XP_537779.2 |                                                                                                                                                                                                                                                                                                                                                    |
| XP_537782.2 | PREDICTED: similar to chromosome 9 open reading frame 111 isoform 1                                                                                                                                                                                                                                                                                |
| XP_537788.2 | PREDICTED: similar to ATP-binding cassette, sub-family A, member 2 (ATP-binding cassette transporter 2) (ATP-binding cassette 2)                                                                                                                                                                                                                   |
| XP_537793.2 | PREDICTED: similar to endothelial differentiation-related factor 1 isoform alpha                                                                                                                                                                                                                                                                   |
| XP_537795.2 | PREDICTED: similar to notch1 preproprotein                                                                                                                                                                                                                                                                                                         |
| XP_537800.1 | PREDICTED: similar to 60S ribosomal protein L7a                                                                                                                                                                                                                                                                                                    |
| XP_537804.2 | PREDICTED: similar to procollagen, type V, alpha 1                                                                                                                                                                                                                                                                                                 |
| XP_537811.2 | PREDICTED: similar to senataxin isoform 1                                                                                                                                                                                                                                                                                                          |
| XP_537814.2 | PREDICTED: similar to G protein-coupled receptor 107                                                                                                                                                                                                                                                                                               |
| XP_537816.2 | PREDICTED: similar to ubiquitin specific protease 20                                                                                                                                                                                                                                                                                               |
| XP_537823.2 | PREDICTED: similar to Spectrin alpha chain, brain (Spectrin, non-erythroid alpha chain) (Alpha-II spectrin) (Fodrin alpha chain)                                                                                                                                                                                                                   |
| XP_537825.2 | PREDICTED: similar to GLE1-like, RNA export mediator isoform 2                                                                                                                                                                                                                                                                                     |
| XP_537828.2 | PREDICTED: similar to Golgi autoantigen, golgin subfamily a, 2                                                                                                                                                                                                                                                                                     |
| XP_537829.2 | PREDICTED: similar to Cip1-interacting zinc finger protein                                                                                                                                                                                                                                                                                         |
| XP_537843.2 | PREDICTED: similar to C06A6.3                                                                                                                                                                                                                                                                                                                      |
| XP_537844.2 | PREDICTED: similar to pre-B-cell leukemia transcription factor 3<br>PREDICTED: similar to 78 kDa glucose-regulated protein precursor (GRP 78) (Immunoglobulin heavy chain binding protein) (BiP) (Endoplasmic reticulum lumenal Ca(2+) binding protein grp78) isoform 1                                                                            |
| XP_537847.2 |                                                                                                                                                                                                                                                                                                                                                    |
| XP_537865.2 | PREDICTED: similar to Elongation factor 1-gamma (EF-1-gamma) (eEF-1B gamma) isoform 1                                                                                                                                                                                                                                                              |
| XP_537866.2 | PREDICTED: similar to Transcription elongation factor A protein 2 (Transcription elongation factor S-II protein 2) (Testis-specific S-II) (Transcription elongation factor TFIIS.I)                                                                                                                                                                |
| XP_537880.2 | PREDICTED: similar to histone 1, H2ai (predicted) isoform 1                                                                                                                                                                                                                                                                                        |

|             |                                                                                                                                                                                                                                                                                                                                                                                       |
|-------------|---------------------------------------------------------------------------------------------------------------------------------------------------------------------------------------------------------------------------------------------------------------------------------------------------------------------------------------------------------------------------------------|
| XP_537883.2 | PREDICTED: hypothetical protein XP_537883                                                                                                                                                                                                                                                                                                                                             |
| XP_537884.2 | PREDICTED: similar to Sad1 and UNC84 domain containing 1                                                                                                                                                                                                                                                                                                                              |
| XP_537889.2 | PREDICTED: similar to uridine phosphorylase 1                                                                                                                                                                                                                                                                                                                                         |
| XP_537900.2 | PREDICTED: similar to Zinc finger protein 208                                                                                                                                                                                                                                                                                                                                         |
| XP_537919.2 | PREDICTED: hypothetical protein XP_537919                                                                                                                                                                                                                                                                                                                                             |
| XP_537927.2 | PREDICTED: similar to insulin-like growth factor binding protein 1                                                                                                                                                                                                                                                                                                                    |
| XP_537945.2 | PREDICTED: similar to Enoyl-CoA hydratase, mitochondrial precursor (Short chain enoyl-CoA hydratase) (SCEH) (Enoyl-CoA hydratase 1)<br>PREDICTED: similar to ADP/ATP translocase 3 (Adenine nucleotide translocator 2) (ANT 3) (ADP,ATP carrier protein 3) (Solute carrier family 25, member 6) (ADP,ATP carrier protein, isoform T2)                                                 |
| XP_537947.2 |                                                                                                                                                                                                                                                                                                                                                                                       |
| XP_537958.2 | PREDICTED: similar to Oral-facial-digital syndrome 1 protein (Protein 71-7A)                                                                                                                                                                                                                                                                                                          |
| XP_537962.2 | PREDICTED: similar to Ankyrin repeat and SOCS box protein 9 (ASB-9) isoform 1                                                                                                                                                                                                                                                                                                         |
| XP_537972.2 | PREDICTED: similar to Sex comb on midleg-like protein 2 isoform 1                                                                                                                                                                                                                                                                                                                     |
| XP_537997.2 | PREDICTED: similar to BCoR protein (BCL-6 corepressor) isoform 1                                                                                                                                                                                                                                                                                                                      |
| XP_538001.2 | PREDICTED: similar to cofactor required for Sp1 transcriptional activation, subunit 2, 150kDa isoform 1<br>PREDICTED: similar to Probable ubiquitin carboxyl-terminal hydrolase FAF-X (Ubiquitin thiolesterase FAF-X) (Ubiquitin-specific processing protease FAF-X) (Deubiquitinating enzyme FAF-X) (Fat facets protein related, X-linked) (Ubiquitin-specific protease 9, X ... iso |
| XP_538002.2 |                                                                                                                                                                                                                                                                                                                                                                                       |
| XP_538007.2 | PREDICTED: similar to EF-hand domain (C-terminal) containing 2                                                                                                                                                                                                                                                                                                                        |
| XP_538010.1 | PREDICTED: similar to PHD finger protein 16                                                                                                                                                                                                                                                                                                                                           |
| XP_538014.2 | PREDICTED: similar to ubiquitin-activating enzyme E1                                                                                                                                                                                                                                                                                                                                  |
| XP_538015.2 | PREDICTED: similar to PCTAIRE protein kinase 1 isoform 1                                                                                                                                                                                                                                                                                                                              |
| XP_538033.2 | PREDICTED: similar to G patch domain and KOW motifs                                                                                                                                                                                                                                                                                                                                   |
| XP_538035.2 | PREDICTED: similar to calcium channel, voltage-dependent, alpha 1F subunit                                                                                                                                                                                                                                                                                                            |
| XP_538047.2 | PREDICTED: similar to melanoma antigen family D, 4 isoform 1                                                                                                                                                                                                                                                                                                                          |
| XP_538049.2 | PREDICTED: similar to Structural maintenance of chromosome 1-like 1 protein (SMC1alpha protein) (SB1.8/DXS423E protein) (Sb1.8)<br>PREDICTED: similar to 3-hydroxyacyl-CoA dehydrogenase type II (Type II HADH) (Endoplasmic reticulum-associated amyloid beta-peptide binding protein) (Short-chain type dehydrogenase/reductase XH98G2) isoform 1                                   |
| XP_538051.2 |                                                                                                                                                                                                                                                                                                                                                                                       |
| XP_538052.2 | PREDICTED: similar to HECT, UBA and WWE domain containing 1 isoform 1                                                                                                                                                                                                                                                                                                                 |
| XP_538054.2 | PREDICTED: similar to guanine nucleotide binding protein-like 3 (nucleolar)-like                                                                                                                                                                                                                                                                                                      |
| XP_538062.2 | PREDICTED: similar to LAS1-like                                                                                                                                                                                                                                                                                                                                                       |
| XP_538100.1 | PREDICTED: similar to heterogeneous nuclear ribonucleoprotein K isoform a isoform 1                                                                                                                                                                                                                                                                                                   |
| XP_538105.2 | PREDICTED: similar to Dystrophin-related protein 2                                                                                                                                                                                                                                                                                                                                    |
| XP_538109.2 | PREDICTED: similar to Alpha-galactosidase A precursor (Melibiase) (Alpha-D-galactoside galactohydrolase) (Alpha-D-galactosidase A) (Agalsidase alfa)                                                                                                                                                                                                                                  |
| XP_538114.2 | PREDICTED: similar to zinc finger, matrin type 1 isoform 1                                                                                                                                                                                                                                                                                                                            |
| XP_538122.1 | PREDICTED: similar to Mortality factor 4-like protein 2 (MORF-related gene X protein) (Transcription factor-like protein MRGX) (MSL3-2 protein) isoform 1                                                                                                                                                                                                                             |
| XP_538131.2 | PREDICTED: similar to MORC family CW-type zinc finger 4 (Zinc finger CW-type coiled-coil domain protein 2)                                                                                                                                                                                                                                                                            |
| XP_538136.2 | PREDICTED: similar to autophagy-related cysteine endopeptidase 2 isoform a                                                                                                                                                                                                                                                                                                            |
| XP_538146.1 | PREDICTED: similar to Myosin regulatory light chain 2, nonsarcomeric (Myosin RLC)                                                                                                                                                                                                                                                                                                     |

|             |                                                                                                                                                                                                                                                                |
|-------------|----------------------------------------------------------------------------------------------------------------------------------------------------------------------------------------------------------------------------------------------------------------|
| XP_538149.2 | PREDICTED: similar to WD repeat domain 44 protein isoform 1                                                                                                                                                                                                    |
| XP_538152.2 | PREDICTED: similar to mitochondrial solute carrier protein                                                                                                                                                                                                     |
| XP_538157.2 | PREDICTED: hypothetical protein XP_538157                                                                                                                                                                                                                      |
| XP_538164.2 | PREDICTED: similar to THO complex subunit 2 (Tho2)                                                                                                                                                                                                             |
| XP_538165.2 | PREDICTED: similar to Baculoviral IAP repeat-containing protein 4 (Inhibitor of apoptosis protein 3) (X-linked inhibitor of apoptosis protein) (X-linked IAP) (IAP-like protein) (HILP)                                                                        |
| XP_538173.2 | PREDICTED: similar to immunoglobulin superfamily, member 1 isoform 1                                                                                                                                                                                           |
| XP_538176.2 | PREDICTED: similar to RAP2C, member of RAS oncogene family                                                                                                                                                                                                     |
| XP_538178.2 | PREDICTED: similar to Glypican-3 precursor (Intestinal protein OCI-5) (GTR2-2) (MXR7)                                                                                                                                                                          |
| XP_538192.2 | PREDICTED: similar to fragile X mental retardation 1 neighbor                                                                                                                                                                                                  |
| XP_538196.1 | PREDICTED: similar to fetal and adult testis expressed transcript protein                                                                                                                                                                                      |
| XP_538200.1 | PREDICTED: similar to B-cell receptor-associated protein 31 (BCR-associated protein Bap31) (p28 Bap31) (CDM protein) (6C6-AG tumor-associated antigen) (DXS1357E)                                                                                              |
| XP_538201.2 | PREDICTED: similar to Isocitrate dehydrogenase [NAD] subunit gamma, mitochondrial precursor (Isocitric dehydrogenase) (NAD(+)-specific ICDH) isoform 1                                                                                                         |
| XP_538204.2 | PREDICTED: similar to transketolase-like 1                                                                                                                                                                                                                     |
| XP_538226.2 | PREDICTED: similar to Receptor tyrosine-protein kinase erbB-3 precursor (c-erbB3) (Tyrosine kinase-type cell surface receptor HER3)                                                                                                                            |
| XP_538227.1 | PREDICTED: hypothetical protein XP_538227                                                                                                                                                                                                                      |
| XP_538228.2 | PREDICTED: similar to SWI/SNF-related matrix-associated actin-dependent regulator of chromatin c2 isoform b                                                                                                                                                    |
| XP_538229.2 | PREDICTED: similar to solute carrier family 39 (metal ion transporter), member 5                                                                                                                                                                               |
| XP_538233.2 | PREDICTED: similar to timeless homolog                                                                                                                                                                                                                         |
| XP_538243.2 | PREDICTED: similar to NGFI-A binding protein 2 (EGR-1 binding protein 2) (Melanoma-associated delayed early response protein) (MADER protein)                                                                                                                  |
| XP_538245.2 | PREDICTED: similar to Low-density lipoprotein receptor-related protein 1 precursor (LRP) (Alpha-2-macroglobulin receptor) (A2MR) (Apolipoprotein E receptor) (APOER) (CD91)                                                                                    |
| XP_538251.2 | PREDICTED: similar to Centaurin gamma 1                                                                                                                                                                                                                        |
| XP_538254.2 | PREDICTED: similar to 25-hydroxyvitamin D-1 alpha hydroxylase, mitochondrial precursor (Calcidiol 1-monooxygenase) (25-OHD-1 alpha-hydroxylase) (25-hydroxyvitamin D(3) 1-alpha-hydroxylase) (VD3 1A hydroxylase) (P450C1 alpha) (P450VD1-alpha)               |
| XP_538265.2 | PREDICTED: similar to SLIT-ROBO Rho GTPase-activating protein 1                                                                                                                                                                                                |
| XP_538268.2 | PREDICTED: similar to CG3996-PA                                                                                                                                                                                                                                |
| XP_538271.2 | PREDICTED: similar to Interleukin-1 receptor-associated kinase-3 (IRAK-3) (IL-1 receptor-associated kinase M) (IRAK-M)                                                                                                                                         |
| XP_538273.2 | PREDICTED: similar to dual-specificity tyrosine-(Y)-phosphorylation regulated kinase 2 isoform 2                                                                                                                                                               |
| XP_538279.2 | PREDICTED: similar to vitelliform macular dystrophy 2-like 3                                                                                                                                                                                                   |
| XP_538280.2 | PREDICTED: similar to RAB3A interacting protein isoform alpha 2                                                                                                                                                                                                |
| XP_538283.2 | PREDICTED: similar to Receptor-type tyrosine-protein phosphatase beta precursor (Protein-tyrosine phosphatase beta) (R-PTP-beta)                                                                                                                               |
| XP_538289.2 | PREDICTED: similar to Shaw-related voltage-gated potassium channel protein 2 isoform KV3.2b                                                                                                                                                                    |
| XP_538304.2 | PREDICTED: similar to C-jun-amino-terminal kinase interacting protein 2 (JNK-interacting protein 2) (JIP-2) (JNK MAP kinase scaffold protein 2) (Islet-brain-2) (IB-2) (Mitogen-activated protein kinase 8-interacting protein 2) isoform 1 [Canis familiaris] |
| XP_538306.2 | PREDICTED: similar to Protein KIAA0711                                                                                                                                                                                                                         |
| XP_538311.2 | PREDICTED: similar to SET binding factor 1 (Sbf1) (Myotubularin-related protein 5)                                                                                                                                                                             |

|             |                                                                                                                                                                                                           |
|-------------|-----------------------------------------------------------------------------------------------------------------------------------------------------------------------------------------------------------|
| XP_538318.2 | PREDICTED: similar to Zinc finger BED domain containing protein 4                                                                                                                                         |
| XP_538324.2 | PREDICTED: similar to Cadherin EGF LAG seven-pass G-type receptor 1 precursor                                                                                                                             |
| XP_538325.2 | PREDICTED: similar to tRNA (5-methylaminomethyl-2-thiouridylate)-methyltransferase 1 isoform a                                                                                                            |
| XP_538329.2 | PREDICTED: similar to Protein C22orf8                                                                                                                                                                     |
| XP_538336.2 | PREDICTED: similar to parvin, beta isoform b                                                                                                                                                              |
| XP_538355.2 | PREDICTED: similar to Ran GTPase-activating protein 1                                                                                                                                                     |
| XP_538361.2 | PREDICTED: similar to trinucleotide repeat containing 6b isoform 1 isoform 1                                                                                                                              |
| XP_538364.2 | PREDICTED: similar to voltage-dependent T-type calcium channel alpha-1I subunit isoform b                                                                                                                 |
| XP_538371.2 | PREDICTED: similar to Sad1/unc-84-like protein 2 (Rab5 interacting protein) (Rab5IP)                                                                                                                      |
| XP_538376.2 | PREDICTED: similar to Transcription factor MafF (V-maf musculoaponeurotic fibrosarcoma oncogene homolog F) (U-Maf)                                                                                        |
| XP_538413.2 | PREDICTED: similar to BTB (POZ) domain containing 11 isoform 2 isoform 1                                                                                                                                  |
| XP_538416.2 | PREDICTED: similar to cytoskeleton-associated protein 4                                                                                                                                                   |
| XP_538439.2 | PREDICTED: similar to UDP-glucuronate decarboxylase 1                                                                                                                                                     |
| XP_538441.2 | PREDICTED: similar to TGF beta receptor associated protein -1                                                                                                                                             |
| XP_538449.2 | PREDICTED: similar to Interleukin-1 receptor, type I precursor (IL-1R-1) (IL-1RT1) (IL-1R-alpha) (p80) (Antigen CD121a)                                                                                   |
| XP_538451.2 | PREDICTED: similar to Interleukin-1 receptor, type II precursor (IL-1R-2) (IL-1R-beta) (Antigen CDw121b)                                                                                                  |
| XP_538455.2 | PREDICTED: similar to Protein C2orf29                                                                                                                                                                     |
| XP_538458.2 | PREDICTED: similar to DNA repair protein REV1 (Rev1-like terminal deoxycytidyl transferase) (Alpha integrin binding protein 80) (AIBP80)                                                                  |
| XP_538462.2 | PREDICTED: similar to Cyclic-nucleotide-gated cation channel alpha 3 (CNG channel alpha 3) (CNG-3) (CNG3) (Cyclic nucleotide gated channel alpha 3) (Cone photoreceptor cGMP-gated channel alpha subunit) |
| XP_538464.2 | PREDICTED: similar to Semaphorin 4C precursor                                                                                                                                                             |
| XP_538467.2 | PREDICTED: similar to cyclin M4                                                                                                                                                                           |
| XP_538475.1 | PREDICTED: similar to sterolin 1                                                                                                                                                                          |
| XP_538477.2 | PREDICTED: similar to sine oculis homeobox homolog 3                                                                                                                                                      |
| XP_538483.2 | PREDICTED: similar to potassium channel, subfamily K, member 12                                                                                                                                           |
| XP_538494.2 | PREDICTED: similar to echinoderm microtubule associated protein like 5                                                                                                                                    |
| XP_538496.2 | PREDICTED: similar to Hook-related protein 1 isoform 1                                                                                                                                                    |
| XP_538497.2 | PREDICTED: similar to polyribonucleotide nucleotidyltransferase 1 isoform 1                                                                                                                               |
| XP_538505.2 | PREDICTED: similar to KIAA1841 protein                                                                                                                                                                    |
| XP_538507.2 | PREDICTED: similar to EH domain binding protein 1 isoform 1                                                                                                                                               |
| XP_538508.1 | PREDICTED: similar to pellino protein                                                                                                                                                                     |
| XP_538511.2 | PREDICTED: similar to Neutral amino acid transporter A (SATT) (Alanine/serine/cysteine/ threonine transporter) (ASCT1)                                                                                    |
| XP_538513.2 | PREDICTED: hypothetical protein XP_538513                                                                                                                                                                 |
| XP_538527.2 | PREDICTED: similar to Rho-GTPase-activating protein 25                                                                                                                                                    |
| XP_538528.2 | PREDICTED: similar to Bone morphogenetic protein 10 precursor (BMP-10) isoform 1                                                                                                                          |
| XP_538534.2 | PREDICTED: similar to Germ cell-less protein-like 1 (mGcl-1) (DP-interacting protein) (DIP) isoform 1                                                                                                     |



|             |                                                                                                                                                                                    |
|-------------|------------------------------------------------------------------------------------------------------------------------------------------------------------------------------------|
| XP_538538.2 | PREDICTED: similar to prenylcysteine oxidase 1                                                                                                                                     |
| XP_538577.2 | PREDICTED: similar to Chibby protein (PKD2 interactor, Golgi and endoplasmic reticulum associated 1) (PIGEA-14) (Cytosolic leucine-rich protein) (HRIHFB2025)                      |
| XP_538581.2 | PREDICTED: similar to Y45F10A.6b                                                                                                                                                   |
| XP_538599.2 | PREDICTED: similar to lysyl oxidase preproprotein isoform 1                                                                                                                        |
| XP_538611.2 | PREDICTED: similar to Solute carrier family 12, member 2 (Bumetanide-sensitive sodium-(potassium)-chloride cotransporter 1) (Basolateral Na-K-Cl symporter)                        |
| XP_538612.2 | PREDICTED: similar to fibrillin 2 precursor                                                                                                                                        |
| XP_538625.2 | PREDICTED: similar to follistatin-like 4                                                                                                                                           |
| XP_538629.2 | PREDICTED: similar to PHD finger protein 15 isoform 1                                                                                                                              |
| XP_538630.2 | PREDICTED: similar to GTP-binding protein SAR1b (GTBPB)                                                                                                                            |
| XP_538639.2 | PREDICTED: similar to chromosome 14 open reading frame 68                                                                                                                          |
| XP_538643.2 | PREDICTED: similar to G2/mitotic-specific cyclin B1                                                                                                                                |
| XP_538647.2 | PREDICTED: similar to Cell division cycle protein 23 homolog (Anaphase promoting complex subunit 8) (APC8) (Cyclosome subunit 8)                                                   |
| XP_538659.2 | PREDICTED: similar to Receptor-type tyrosine-protein phosphatase delta precursor (Protein-tyrosine phosphatase delta) (R-PTP-delta)                                                |
| XP_538669.2 | PREDICTED: similar to CG5020-PA, isoform A                                                                                                                                         |
| XP_538678.2 | PREDICTED: similar to CG3520-PA                                                                                                                                                    |
| XP_538686.2 | PREDICTED: similar to DMRT-like family A1                                                                                                                                          |
| XP_538689.2 | PREDICTED: similar to transcription elongation factor B polypeptide 3 binding protein 1 isoform 1                                                                                  |
| XP_538703.2 | PREDICTED: similar to nuclear transcription factor, X-box binding 1 isoform 1 isoform 2                                                                                            |
| XP_538704.2 | PREDICTED: similar to nucleolar RNA-associated protein alpha isoform                                                                                                               |
| XP_538715.2 | PREDICTED: similar to RUN and SH3 domain containing protein 2 isoform 1                                                                                                            |
| XP_538730.2 | PREDICTED: similar to Maternal embryonic leucine zipper kinase (hMELK) (Protein kinase PK38) (hPK38)                                                                               |
| XP_538736.2 | PREDICTED: similar to FERM and PDZ domain containing 1                                                                                                                             |
| XP_538738.1 | PREDICTED: similar to Exosome complex exonuclease RRP40 (Ribosomal RNA processing protein 40) (Exosome component 3) (p10)                                                          |
| XP_538746.2 | PREDICTED: similar to N-acetylneuraminic acid phosphate synthase isoform 1                                                                                                         |
| XP_538748.2 | PREDICTED: similar to TBC1 domain family member 2 (Prostate antigen recognized and indentified by SEREX) (PARIS-1)                                                                 |
| XP_538749.2 | PREDICTED: similar to Gamma-aminobutyric acid type B receptor, subunit 2 precursor (GABA-B receptor 2) (GABA-B-R2) (Gb2) (GABABR2) (G-protein coupled receptor 51) (GPR 51) (HG20) |
| XP_538773.2 | PREDICTED: similar to ATP-binding cassette, sub-family A member 1                                                                                                                  |
| XP_538777.2 | PREDICTED: similar to zinc finger protein 462 isoform 1                                                                                                                            |
| XP_538789.2 | PREDICTED: similar to sushi domain containing 1                                                                                                                                    |
| XP_538794.2 | PREDICTED: similar to sorting nexin 7 (predicted)                                                                                                                                  |
| XP_538799.2 | PREDICTED: similar to ciliary rootlet coiled-coil, rootletin                                                                                                                       |
| XP_538806.2 | PREDICTED: similar to regulator of G-protein signalling 3 isoform 6                                                                                                                |
| XP_538807.2 | PREDICTED: similar to AMBP protein precursor                                                                                                                                       |
| XP_538813.2 | PREDICTED: similar to pregnancy-associated plasma protein A preproprotein                                                                                                          |
| XP_538814.2 | PREDICTED: similar to astrotactin 2 isoform b                                                                                                                                      |

|             |                                                                                                                                                                                                                                                                         |
|-------------|-------------------------------------------------------------------------------------------------------------------------------------------------------------------------------------------------------------------------------------------------------------------------|
| XP_538840.2 | PREDICTED: similar to HLA-B-associated transcript 9                                                                                                                                                                                                                     |
| XP_538841.2 | PREDICTED: similar to superkiller viralicidic activity 2-like homolog                                                                                                                                                                                                   |
| XP_538843.2 | PREDICTED: similar to Complement C4 precursor                                                                                                                                                                                                                           |
| XP_538845.1 | PREDICTED: similar to WAF-1/CIP1 stabilizing protein 39                                                                                                                                                                                                                 |
| XP_538846.2 | PREDICTED: similar to NG3 protein                                                                                                                                                                                                                                       |
| XP_538847.2 | PREDICTED: similar to Neurogenic locus notch homolog protein 4 precursor (Notch 4) (hNotch4)                                                                                                                                                                            |
| XP_538849.2 | PREDICTED: similar to butyrophilin-like 8                                                                                                                                                                                                                               |
| XP_538855.2 | PREDICTED: similar to collagen, type XI, alpha 2 isoform 1 preproprotein isoform 1                                                                                                                                                                                      |
| XP_538859.2 | PREDICTED: similar to WD-repeat protein BING4                                                                                                                                                                                                                           |
| XP_538860.2 | PREDICTED: similar to ral guanine nucleotide dissociation stimulator-like 2 isoform 1                                                                                                                                                                                   |
| XP_538862.2 | PREDICTED: similar to PHD finger protein 1 isoform a isoform 1                                                                                                                                                                                                          |
| XP_538863.2 | PREDICTED: similar to Ras GTPase-activating protein SynGAP (Synaptic Ras-GTPase-activating protein 1) (Synaptic Ras-GAP 1) (Neuronal RasGAP) (p135 SynGAP)                                                                                                              |
| XP_538867.2 | PREDICTED: similar to Inositol 1,4,5-trisphosphate receptor type 3 (Type 3 inositol 1,4,5-trisphosphate receptor) (Type 3 InsP3 receptor) (IP3 receptor isoform 3) (InsP3R3) isoform 1                                                                                  |
| XP_538874.2 | PREDICTED: similar to signal peptide, CUB domain, EGF-like 3                                                                                                                                                                                                            |
| XP_538875.2 | PREDICTED: similar to Zinc finger protein 76 isoform 2                                                                                                                                                                                                                  |
| XP_538880.2 | PREDICTED: similar to FK506-binding protein 5 (Peptidyl-prolyl cis-trans isomerase) (PPIase) (Rotamase) (51 kDa FK506-binding protein) (FKBP-51) (54 kDa progesterone receptor-associated immunophilin) (FKBP54) (P54) (FF1 antigen) (HSP90-binding immunophilin) (...) |
| XP_538883.2 | PREDICTED: similar to Bromodomain and PHD finger-containing protein 3                                                                                                                                                                                                   |
| XP_538896.2 | PREDICTED: similar to CG6379-PA isoform 1                                                                                                                                                                                                                               |
| XP_538905.2 | PREDICTED: similar to Molybdenum cofactor biosynthesis protein 1 B (MOCS1B) (Molybdenum cofactor synthesis-step 1 protein A-B) (Molybdenum cofactor biosynthesis protein C)                                                                                             |
| XP_538906.2 | PREDICTED: similar to leucine rich repeat and fibronectin type III domain containing 2                                                                                                                                                                                  |
| XP_538915.1 | PREDICTED: similar to fibroblast growth factor receptor substrate 3                                                                                                                                                                                                     |
| XP_538923.2 | PREDICTED: similar to beta-tubulin cofactor C                                                                                                                                                                                                                           |
| XP_538928.2 | PREDICTED: similar to Cullin-7 (CUL-7)                                                                                                                                                                                                                                  |
| XP_538930.2 | PREDICTED: similar to p53-associated parkin-like cytoplasmic protein isoform 1                                                                                                                                                                                          |
| XP_538934.2 | PREDICTED: similar to ATP-binding cassette, sub-family C, member 10                                                                                                                                                                                                     |
| XP_538935.1 | PREDICTED: similar to EGF-like-domain, multiple 9 isoform 1                                                                                                                                                                                                             |
| XP_538939.2 | PREDICTED: similar to GTP binding protein 2 isoform 1                                                                                                                                                                                                                   |
| XP_538941.2 | PREDICTED: similar to ZK1067.4                                                                                                                                                                                                                                          |
| XP_538964.2 | PREDICTED: similar to intestinal cell kinase                                                                                                                                                                                                                            |
| XP_538970.2 | PREDICTED: similar to glyceraldehyde-3-phosphate dehydrogenase                                                                                                                                                                                                          |
| XP_538971.1 | PREDICTED: hypothetical protein XP_538971                                                                                                                                                                                                                               |
| XP_538985.2 | PREDICTED: similar to PHD finger protein 3 isoform 1                                                                                                                                                                                                                    |
| XP_538993.2 | PREDICTED: similar to alpha 1 type XIX collagen precursor                                                                                                                                                                                                               |
| XP_538998.2 | PREDICTED: similar to Regulating synaptic membrane exocytosis protein 1 (Rab3-interacting molecule 1) (RIM 1) isoform 1                                                                                                                                                 |

|             |                                                                                                                                                                                                                                                |
|-------------|------------------------------------------------------------------------------------------------------------------------------------------------------------------------------------------------------------------------------------------------|
| XP_539002.2 | PREDICTED: similar to alpha 1 type XII collagen long isoform precursor isoform 1                                                                                                                                                               |
| XP_539004.2 | PREDICTED: similar to SUMO1/sentrin specific protease 6                                                                                                                                                                                        |
| XP_539014.1 | PREDICTED: similar to Protein C6orf152                                                                                                                                                                                                         |
| XP_539015.1 | PREDICTED: similar to elongation of very long chain fatty acids (FEN1/Elo2, SUR4/Elo3, yeast)-like 4                                                                                                                                           |
| XP_539020.2 | PREDICTED: similar to 5T4 oncofetal trophoblast glycoprotein                                                                                                                                                                                   |
| XP_539024.2 | PREDICTED: similar to T-box transcription factor TBX18 (T-box protein 18)                                                                                                                                                                      |
| XP_539029.2 | PREDICTED: similar to Zinc finger protein 292                                                                                                                                                                                                  |
| XP_539032.2 | PREDICTED: similar to arginyl-tRNA synthetase-like isoform 1                                                                                                                                                                                   |
| XP_539036.2 | PREDICTED: similar to Phosphatidylethanolamine-binding protein (PEBP) (Prostatic binding protein) (HCNPPp) (Neuropolypeptide h3) (Raf kinase inhibitor protein) (RKIP)                                                                         |
| XP_539044.2 | PREDICTED: similar to BTB and CNC homology 1, basic leucine zipper transcription factor 2 isoform 1                                                                                                                                            |
| XP_539054.2 | PREDICTED: similar to ubiquitin specific protease 45 isoform 1                                                                                                                                                                                 |
| XP_539055.2 | PREDICTED: similar to PR domain containing 13                                                                                                                                                                                                  |
| XP_539068.2 | PREDICTED: similar to PR-domain zinc finger protein 1 (Beta-interferon gene positive-regulatory domain I binding factor) (BLIMP-1)                                                                                                             |
| XP_539072.2 | PREDICTED: similar to sex comb on midleg-like 4                                                                                                                                                                                                |
| XP_539079.2 | PREDICTED: similar to microtubule associated monooxygenase, calponin and LIM domain containing 1                                                                                                                                               |
| XP_539084.2 | PREDICTED: similar to DNA polymerase zeta catalytic subunit (hREV3) isoform 1                                                                                                                                                                  |
| XP_539086.1 | PREDICTED: similar to ret finger protein-like 4                                                                                                                                                                                                |
| XP_539094.2 | PREDICTED: similar to Testis-specific Y-encoded-like protein 4 (TSPY-like 4)                                                                                                                                                                   |
| XP_539099.2 | PREDICTED: similar to Ribonucleases P/MRP protein subunit POP1 (hPOP1)                                                                                                                                                                         |
| XP_539102.2 | PREDICTED: similar to vacuolar protein sorting 13B isoform 5 isoform 1                                                                                                                                                                         |
| XP_539113.2 | PREDICTED: similar to Transforming growth factor-beta-inducible early growth response protein 1 (TGFB-inducible early growth response protein 1) (TIEG-1) (Krueppel-like factor 10) (EGRalpha)                                                 |
| XP_539130.2 | PREDICTED: similar to potassium channel, subfamily V, member 1                                                                                                                                                                                 |
| XP_539133.2 | PREDICTED: similar to Wilms tumour 1-associating protein                                                                                                                                                                                       |
| XP_539139.2 | PREDICTED: similar to Zinc finger transcription factor Trps1 (Zinc finger protein GC79) (Tricho-rhino-phalangeal syndrome type I protein) isoform 1                                                                                            |
| XP_539145.2 | PREDICTED: similar to Exostosin-1 (Glucuronosyl-N-acetylglucosaminyl-proteoglycan/N-acetylglucosaminyl-proteoglycan 4-alpha-N-acetylglucosaminyltransferase) (Putative tumor suppressor protein EXT1) (Multiple exostoses protein 1) isoform 1 |
| XP_539151.2 | PREDICTED: similar to basic beta 1 syntrophin isoform 1                                                                                                                                                                                        |
| XP_539154.2 | PREDICTED: similar to Zinc fingers and homeoboxes protein 2                                                                                                                                                                                    |
| XP_539156.2 | PREDICTED: similar to F33H2.2                                                                                                                                                                                                                  |
| XP_539159.2 | PREDICTED: similar to zinc finger protein 572                                                                                                                                                                                                  |
| XP_539160.2 | PREDICTED: similar to G-protein-coupled receptor induced protein                                                                                                                                                                               |
| XP_539165.2 | PREDICTED: similar to development and differentiation enhancing factor 1                                                                                                                                                                       |
| XP_539166.2 | PREDICTED: similar to adenylate cyclase 8                                                                                                                                                                                                      |
| XP_539170.2 | PREDICTED: similar to N-myc downstream regulated gene 1                                                                                                                                                                                        |
| XP_539177.2 | PREDICTED: similar to collagen, type XXII, alpha 1                                                                                                                                                                                             |

|             |                                                                                                                                                                                                |
|-------------|------------------------------------------------------------------------------------------------------------------------------------------------------------------------------------------------|
| XP_539178.2 | PREDICTED: similar to Potassium channel subfamily K member 9 (Acid-sensitive potassium channel protein TASK-3) (TWIK-related acid-sensitive K(+) channel 3) (Two pore potassium channel KT3.2) |
| XP_539181.2 | PREDICTED: similar to proton-associated sugar transporter A                                                                                                                                    |
| XP_539198.2 | PREDICTED: similar to Zinc finger CCCH-type domain containing protein 3                                                                                                                        |
| XP_539199.2 | PREDICTED: similar to tigger transposable element derived 5                                                                                                                                    |
| XP_539200.1 | PREDICTED: similar to pyrroline-5-carboxylate reductase-like                                                                                                                                   |
| XP_539201.2 | PREDICTED: similar to extracellular signal-regulated kinase 7                                                                                                                                  |
| XP_539202.2 | PREDICTED: hypothetical protein XP_539202                                                                                                                                                      |
| XP_539206.2 | PREDICTED: similar to 5-oxoprolinase (ATP-hydrolysing)                                                                                                                                         |
| XP_539209.2 | PREDICTED: similar to KIAA1875 protein                                                                                                                                                         |
| XP_539211.2 | PREDICTED: similar to C34G6.1                                                                                                                                                                  |
| XP_539222.2 | PREDICTED: similar to ATP-dependent DNA helicase Q4 (RecQ protein-like 4) (RecQ4)                                                                                                              |
| XP_539223.2 | PREDICTED: similar to Leucine-rich repeat-containing protein 14                                                                                                                                |
| XP_539224.2 | PREDICTED: similar to KIAA1688 protein                                                                                                                                                         |
| XP_539233.2 | PREDICTED: similar to Neuronal acetylcholine receptor protein, alpha-5 subunit precursor                                                                                                       |
| XP_539234.2 | PREDICTED: similar to Wolfram syndrome 1                                                                                                                                                       |
| XP_539251.2 | PREDICTED: similar to gamma-aminobutyric acid A receptor, alpha 4 precursor                                                                                                                    |
| XP_539254.2 | PREDICTED: similar to Atrial natriuretic peptide-converting enzyme (pro-ANP-converting enzyme) (Corin) (Heart specific serine proteinase ATC2) (Transmembrane protease, serine 10)             |
| XP_539258.2 | PREDICTED: similar to Tyrosine-protein kinase TXK                                                                                                                                              |
| XP_539259.2 | PREDICTED: similar to Tyrosine-protein kinase Tec isoform 1                                                                                                                                    |
| XP_539265.2 | PREDICTED: similar to CG40500-PA.3                                                                                                                                                             |
| XP_539266.2 | PREDICTED: hypothetical protein XP_539266                                                                                                                                                      |
| XP_539276.2 | PREDICTED: similar to centrosome protein 4                                                                                                                                                     |
| XP_539277.2 | PREDICTED: hypothetical protein XP_539277                                                                                                                                                      |
| XP_539282.2 | PREDICTED: similar to RE1-silencing transcription factor                                                                                                                                       |
| XP_539285.2 | PREDICTED: similar to latrophilin 3                                                                                                                                                            |
| XP_539306.2 | PREDICTED: similar to Mps one binder kinase activator-like 1A (Mob1 homolog 1A)                                                                                                                |
| XP_539307.2 | PREDICTED: similar to Deoxycytidine kinase (dCK)                                                                                                                                               |
| XP_539311.2 | PREDICTED: similar to a disintegrin-like and metalloprotease (repolysin type) with thrombospondin type 1 motif, 3 proprotein                                                                   |
| XP_539316.2 | PREDICTED: similar to methylenetetrahydrofolate dehydrogenase (NADP+ dependent) 2-like                                                                                                         |
| XP_539324.2 | PREDICTED: similar to tripartite motif-containing 11 isoform 1                                                                                                                                 |
| XP_539325.2 | PREDICTED: similar to obscurin, cytoskeletal calmodulin and titin-interacting RhoGEF                                                                                                           |
| XP_539327.2 | PREDICTED: similar to Wnt-3a protein precursor                                                                                                                                                 |
| XP_539328.2 | PREDICTED: similar to wingless-type MMTV integration site 9A                                                                                                                                   |
| XP_539369.2 | PREDICTED: similar to Exocyst complex component Sec8                                                                                                                                           |

|             |                                                                                                                                                                                                              |
|-------------|--------------------------------------------------------------------------------------------------------------------------------------------------------------------------------------------------------------|
| XP_539375.2 | PREDICTED: similar to testis specific, 14                                                                                                                                                                    |
| XP_539383.2 | PREDICTED: similar to interferon regulatory factor 5 isoform a                                                                                                                                               |
| XP_539384.2 | PREDICTED: similar to cysteine rich BMP regulator 2 (chordin like)                                                                                                                                           |
| XP_539385.1 | PREDICTED: similar to Filamin C (Gamma-filamin) (Filamin 2) (Protein FLNc) (Actin-binding-like protein) (ABP-L) (ABP-280-like protein) isoform 4                                                             |
| XP_539388.2 | PREDICTED: similar to Golgi coiled-coil protein 1                                                                                                                                                            |
| XP_539390.2 | PREDICTED: similar to T-complex protein 1, delta subunit (TCP-1-delta) (CCT-delta) (A45)                                                                                                                     |
| XP_539392.2 | PREDICTED: similar to zinc finger protein 267                                                                                                                                                                |
| XP_539399.2 | PREDICTED: similar to zinc finger protein 300                                                                                                                                                                |
| XP_539406.2 | PREDICTED: similar to Tnfa-induced adipose-related protein                                                                                                                                                   |
| XP_539407.2 | PREDICTED: hypothetical protein XP_539407                                                                                                                                                                    |
| XP_539408.2 | PREDICTED: similar to six transmembrane epithelial antigen of the prostate 2                                                                                                                                 |
| XP_539411.2 | PREDICTED: similar to Frizzled 1 precursor (Frizzled-1) (Fz-1) (hFz1) (FzE1)                                                                                                                                 |
| XP_539413.2 | PREDICTED: similar to Suppressor Of Clr family member (soc-2)                                                                                                                                                |
| XP_539418.2 | PREDICTED: similar to ocular development-associated gene                                                                                                                                                     |
| XP_539425.2 | PREDICTED: similar to Neurabin-1 (Neurabin-I) (Neural tissue-specific F-actin binding protein I) (Protein phosphatase 1 regulatory subunit 9A) isoform 1                                                     |
| XP_539431.2 | PREDICTED: similar to core 1 synthase, glycoprotein-N-acetylgalactosamine 3-beta-galactosyltransferase, 1 isoform 1                                                                                          |
| XP_539440.2 | PREDICTED: similar to notch homolog 5                                                                                                                                                                        |
| XP_539445.2 | PREDICTED: similar to Diacylglycerol kinase, beta (Diglyceride kinase) (DGK-beta) (DAG kinase beta) (90 kDa diacylglycerol kinase)                                                                           |
| XP_539446.2 | PREDICTED: similar to Homeobox protein MOX-2 (Mesenchyme homeobox 2) (Growth arrest-specific homeobox)                                                                                                       |
| XP_539460.1 | PREDICTED: similar to putative binding protein 7a5                                                                                                                                                           |
| XP_539461.2 | PREDICTED: similar to ATP-binding cassette, sub-family B (MDR/TAP), member 1                                                                                                                                 |
| XP_539462.1 | PREDICTED: similar to Sp4 transcription factor isoform 1                                                                                                                                                     |
| XP_539463.2 | PREDICTED: similar to dynein, axonemal, heavy polypeptide 11                                                                                                                                                 |
| XP_539483.2 | PREDICTED: similar to src family associated phosphoprotein 2                                                                                                                                                 |
| XP_539484.2 | PREDICTED: similar to homeobox A1 protein isoform a isoform 1                                                                                                                                                |
| XP_539495.2 | PREDICTED: similar to Carboxypeptidase N subunit 2 precursor (Carboxypeptidase N polypeptide 2) (Carboxypeptidase N 83 kDa chain) (Carboxypeptidase N regulatory subunit) (Carboxypeptidase N large subunit) |
| XP_539502.2 | PREDICTED: similar to Growth hormone-releasing hormone receptor precursor (GHRH receptor) (GRF receptor) (GRFR)                                                                                              |
| XP_539505.2 | PREDICTED: similar to G substrate                                                                                                                                                                            |
| XP_539524.2 | PREDICTED: similar to Deducator of cytokinesis protein 4                                                                                                                                                     |
| XP_539545.2 | PREDICTED: similar to Receptor-type tyrosine-protein phosphatase zeta precursor (R-PTP-zeta)                                                                                                                 |
| XP_539556.2 | PREDICTED: similar to erythroblast membrane-associated protein                                                                                                                                               |
| XP_539558.2 | PREDICTED: similar to CG31800-PA                                                                                                                                                                             |
| XP_539562.2 | PREDICTED: similar to family with sequence similarity 80, member A                                                                                                                                           |
| XP_539593.2 | PREDICTED: similar to Thyroid hormone receptor-associated protein complex 150 kDa component (Trap150) (Thyroid hormone receptor associated protein 3) isoform 2                                              |
| XP_539598.2 | PREDICTED: similar to claspin                                                                                                                                                                                |

|             |                                                                                                                                                            |
|-------------|------------------------------------------------------------------------------------------------------------------------------------------------------------|
| XP_539599.2 | PREDICTED: similar to transcription factor AP-2 epsilon (activating enhancer binding protein 2 epsilon)                                                    |
| XP_539601.2 | PREDICTED: similar to zinc finger protein 262 isoform 1                                                                                                    |
| XP_539604.1 | PREDICTED: similar to Gap junction beta-4 protein (Connexin 30.3) (Cx30.3)                                                                                 |
| XP_539611.2 | PREDICTED: similar to USP6 N-terminal like protein (Related to the N terminus of tre) (RN-tre)                                                             |
| XP_539612.2 | PREDICTED: similar to zyg-11 homolog B (C. elegans)-like                                                                                                   |
| XP_539619.2 | PREDICTED: similar to solute carrier family 5 (sodium/glucose cotransporter), member 9                                                                     |
| XP_539627.2 | PREDICTED: similar to fatty acid amide hydrolase                                                                                                           |
| XP_539629.2 | PREDICTED: similar to Phosphatidylinositol 3-kinase regulatory gamma subunit (PI3-kinase p85-gamma subunit) (PtdIns-3-kinase p85-gamma) (p55PIK) isoform 1 |
| XP_539630.2 | PREDICTED: similar to Microtubule-associated serine/threonine-protein kinase 2                                                                             |
| XP_539635.2 | PREDICTED: similar to HECT domain containing 3 isoform 1                                                                                                   |
| XP_539636.2 | PREDICTED: similar to Patched protein homolog 2 (PTC2)                                                                                                     |
| XP_539647.2 | PREDICTED: similar to Jumonji domain containing protein 2A isoform 1                                                                                       |
| XP_539649.2 | PREDICTED: similar to KIAA0467 protein                                                                                                                     |
| XP_539651.2 | PREDICTED: similar to Cell division cycle protein 20 homolog (p55CDC)                                                                                      |
| XP_539652.2 | PREDICTED: similar to tyrosine kinase with immunoglobulin-like and EGF-like domains 1                                                                      |
| XP_539671.2 | PREDICTED: similar to cyclin B1 interacting protein 1 isoform a                                                                                            |
| XP_539672.2 | PREDICTED: similar to Telomerase protein component 1 (Telomerase-associated protein 1) (Telomerase protein 1) (p240) (p80 telomerase homolog)              |
| XP_539681.2 | PREDICTED: similar to Zinc transporter ZIP2 (Eti-1) (6A1) (hZIP2) (Solute carrier family 39, member 2)                                                     |
| XP_539694.2 | PREDICTED: similar to neuron navigator 3                                                                                                                   |
| XP_539698.2 | PREDICTED: similar to protein tyrosine phosphatase, receptor type, Q isoform 1 precursor                                                                   |
| XP_539708.2 | PREDICTED: similar to centrosome protein cep290 isoform 1                                                                                                  |
| XP_539720.2 | PREDICTED: similar to Suppressor of cytokine signaling 2 (SOCS-2) (Cytokine-inducible SH2 protein 2) (CIS-2) (STAT induced STAT inhibitor 2) (SSI-2)       |
| XP_539728.2 | PREDICTED: similar to Leukotriene A-4 hydrolase (LTA-4 hydrolase) (Leukotriene A(4) hydrolase)                                                             |
| XP_539733.2 | PREDICTED: similar to neural precursor cell expressed, developmentally down-regulated 1                                                                    |
| XP_539745.2 | PREDICTED: similar to Achaete-scute homolog 1                                                                                                              |
| XP_539752.2 | PREDICTED: similar to methylmalonic aciduria type A                                                                                                        |
| XP_539757.2 | PREDICTED: similar to Rho GTPase activating protein 10                                                                                                     |
| XP_539760.2 | PREDICTED: similar to doublecortin kinase 2                                                                                                                |
| XP_539768.2 | PREDICTED: similar to CG33556-PA                                                                                                                           |
| XP_539776.2 | PREDICTED: similar to dachsous 2 isoform 1                                                                                                                 |
| XP_539781.1 | PREDICTED: similar to amiloride-sensitive cation channel 5, intestinal                                                                                     |
| XP_539784.2 | PREDICTED: similar to Glutamate receptor 2 precursor (GluR-2) (GluR-B) (GluR-K2) (Glutamate receptor ionotropic, AMPA 2)                                   |
| XP_539791.2 | PREDICTED: similar to tolloid-like 1                                                                                                                       |
| XP_539802.2 | PREDICTED: similar to DNA polymerase delta subunit 2 (DNA polymerase delta subunit p50)                                                                    |
| XP_539803.2 | PREDICTED: similar to calcium/calmodulin-dependent protein kinase IIB isoform 5                                                                            |
| XP_539807.2 | PREDICTED: similar to cell cycle progression 2 protein isoform 1                                                                                           |

|             |                                                                                                                              |
|-------------|------------------------------------------------------------------------------------------------------------------------------|
| XP_539811.2 | PREDICTED: similar to adenylate cyclase 1                                                                                    |
| XP_539815.2 | PREDICTED: similar to zinc finger protein 672                                                                                |
| XP_539821.2 | PREDICTED: similar to HSPC049 protein                                                                                        |
| XP_539831.2 | PREDICTED: similar to Protein disulfide-isomerase A4 precursor (Protein ERp-72) (ERp72) isoform 1                            |
| XP_539834.2 | PREDICTED: similar to rho guanine nucleotide exchange factor 5 isoform 1                                                     |
| XP_539848.2 | PREDICTED: similar to olfactory receptor Olr804                                                                              |
| XP_539851.2 | PREDICTED: similar to Ephrin type-A receptor 1 precursor (Tyrosine-protein kinase receptor EPH)                              |
| XP_539852.2 | PREDICTED: similar to Zyxin (Zyxin 2)                                                                                        |
| XP_539859.2 | PREDICTED: similar to Kell blood group glycoprotein (CD238 antigen)                                                          |
| XP_539880.2 | PREDICTED: similar to multi-substrate lipid kinase                                                                           |
| XP_539882.2 | PREDICTED: similar to suppression of tumorigenicity 5                                                                        |
| XP_539885.2 | PREDICTED: similar to PHD finger protein 8                                                                                   |
| XP_539887.2 | PREDICTED: similar to Thromboxane-A synthase (TXA synthase) (TXS)                                                            |
| XP_539894.2 | PREDICTED: similar to zinc finger antiviral protein isoform 1                                                                |
| XP_539895.2 | PREDICTED: similar to ATPase, H <sup>+</sup> transporting, lysosomal V0 subunit a isoform 4 isoform 2                        |
| XP_539896.2 | PREDICTED: similar to ZK637.1                                                                                                |
| XP_539898.2 | PREDICTED: similar to zinc finger protein 425                                                                                |
| XP_539908.2 | PREDICTED: similar to replication initiator 1 isoform 1                                                                      |
| XP_539913.2 | PREDICTED: similar to GTPase, IMAP family member 5                                                                           |
| XP_539915.2 | PREDICTED: similar to nitric oxide synthase 3 antisense                                                                      |
| XP_539917.2 | PREDICTED: similar to amiloride-sensitive cation channel 3 isoform a                                                         |
| XP_539928.2 | PREDICTED: similar to PAX interacting (with transcription-activation domain) protein 1                                       |
| XP_539933.2 | PREDICTED: similar to ring finger protein 32                                                                                 |
| XP_539936.2 | PREDICTED: similar to homeo box HB9                                                                                          |
| XP_539937.2 | PREDICTED: similar to Ubiquitin-protein ligase E3C isoform 1                                                                 |
| XP_539940.2 | PREDICTED: similar to protein tyrosine phosphatase, receptor type, N polypeptide 2 isoform 1 precursor                       |
| XP_539942.2 | PREDICTED: similar to CG18497-PA, isoform A                                                                                  |
| XP_539957.2 | PREDICTED: similar to ankyrin 1 isoform 3                                                                                    |
| XP_539966.2 | PREDICTED: similar to pleckstrin homology domain-containing, family A (phosphoinositide binding specific) member 2 isoform 1 |
| XP_539967.2 | PREDICTED: similar to Rab coupling protein isoform 3 isoform 1                                                               |
| XP_539968.2 | PREDICTED: similar to G protein-coupled receptor 124                                                                         |
| XP_539970.2 | PREDICTED: similar to zinc finger protein 503 isoform 1                                                                      |
| XP_539984.2 | PREDICTED: similar to Werner syndrome protein                                                                                |
| XP_539995.2 | PREDICTED: similar to dual specificity phosphatase 4                                                                         |
| XP_540000.2 | PREDICTED: hypothetical protein XP_540000                                                                                    |
| XP_540001.2 | PREDICTED: similar to ring finger protein 127                                                                                |

|             |                                                                                                                                                                                                                                                           |
|-------------|-----------------------------------------------------------------------------------------------------------------------------------------------------------------------------------------------------------------------------------------------------------|
| XP_540002.2 | PREDICTED: similar to CG17807-PA                                                                                                                                                                                                                          |
| XP_540005.2 | PREDICTED: similar to sarcoglycan zeta                                                                                                                                                                                                                    |
| XP_540011.2 | PREDICTED: similar to mitochondrial tumor suppressor 1 isoform 1                                                                                                                                                                                          |
| XP_540014.2 | PREDICTED: similar to FRG1 protein (FSHD region gene 1 protein)                                                                                                                                                                                           |
| XP_540017.2 | PREDICTED: similar to tripartite motif protein 39                                                                                                                                                                                                         |
| XP_540019.2 | PREDICTED: similar to Melatonin receptor type 1A (Mel-1A-R) (Mel1a melatonin receptor)                                                                                                                                                                    |
| XP_540021.2 | PREDICTED: similar to Arg/Abl-interacting protein 2 isoform 2 isoform 2                                                                                                                                                                                   |
| XP_540027.2 | PREDICTED: similar to storkhead box 2                                                                                                                                                                                                                     |
| XP_540035.2 | PREDICTED: similar to CG12600-PA isoform 1                                                                                                                                                                                                                |
| XP_540047.2 | PREDICTED: similar to Vascular endothelial growth factor C precursor (VEGF-C) (Vascular endothelial growth factor related protein) (VRP) (Flt4 ligand) (Flt4-L)                                                                                           |
| XP_540049.2 | PREDICTED: similar to WD repeat domain 17 isoform 1                                                                                                                                                                                                       |
| XP_540051.2 | PREDICTED: similar to Ral guanine nucleotide dissociation stimulator (RalGEF) (RalGDS)                                                                                                                                                                    |
| XP_540068.2 | PREDICTED: similar to myelin transcription factor 1-like isoform 1                                                                                                                                                                                        |
| XP_540083.2 | PREDICTED: similar to Rho-associated protein kinase 2 (Rho-associated, coiled-coil containing protein kinase 2) (p164 ROCK-2) (Rho kinase 2)                                                                                                              |
| XP_540085.2 | PREDICTED: similar to neurotensin receptor 2                                                                                                                                                                                                              |
| XP_540088.2 | PREDICTED: similar to neuroblastoma-amplified protein                                                                                                                                                                                                     |
| XP_540093.2 | PREDICTED: similar to CG10670-PA                                                                                                                                                                                                                          |
| XP_540096.2 | PREDICTED: similar to retinol dehydrogenase 14 (all-trans and 9-cis) isoform 1                                                                                                                                                                            |
| XP_540100.1 | PREDICTED: similar to CG9413-PA, isoform A                                                                                                                                                                                                                |
| XP_540101.2 | PREDICTED: similar to rhoB gene                                                                                                                                                                                                                           |
| XP_540104.2 | PREDICTED: similar to tudor domain containing 6                                                                                                                                                                                                           |
| XP_540110.2 | PREDICTED: similar to DNA cytosine methyltransferase 3 alpha isoform a                                                                                                                                                                                    |
| XP_540111.2 | PREDICTED: similar to dystrobrevin, beta isoform 1                                                                                                                                                                                                        |
| XP_540113.2 | PREDICTED: similar to Kinesin-like protein KIF3C isoform 1                                                                                                                                                                                                |
| XP_540116.2 | PREDICTED: similar to G-protein coupled receptor 113                                                                                                                                                                                                      |
| XP_540122.2 | PREDICTED: similar to Prolactin regulatory element-binding protein (Mammalian guanine nucleotide exchange factor mSec12) isoform 1                                                                                                                        |
| XP_540124.2 | PREDICTED: similar to carbamoylphosphate synthetase 2/aspartate transcarbamylase/dihydroorotase                                                                                                                                                           |
| XP_540128.2 | PREDICTED: similar to selective LIM binding factor, rat homolog isoform 1                                                                                                                                                                                 |
| XP_540136.2 | PREDICTED: similar to anaplastic lymphoma kinase Ki-1                                                                                                                                                                                                     |
| XP_540138.2 | PREDICTED: similar to lysocardiolipin acyltransferase isoform 1                                                                                                                                                                                           |
| XP_540140.2 | PREDICTED: similar to Polypeptide N-acetylgalactosaminyltransferase 14 (Protein-UDP acetylgalactosaminyltransferase 14) (UDP-GalNAc:polypeptide N-acetylgalactosaminyltransferase 14) (Polypeptide GalNAc transferase 14) (GalNAc-T14) (pp-GaNTase 14)... |
| XP_540141.2 | PREDICTED: similar to Calpain-1 catalytic subunit (Calpain-1 large subunit) (Calcium-activated neutral proteinase 1) (CANP 1) (Calpain mu-type) (muCANP) (Micromolar-calpain)                                                                             |
| XP_540142.2 | PREDICTED: similar to EH-domain containing 3                                                                                                                                                                                                              |
| XP_540144.2 | PREDICTED: similar to Protein C2orf4 (C21orf19-like protein)                                                                                                                                                                                              |



|             |                                                                                                                                                                                      |
|-------------|--------------------------------------------------------------------------------------------------------------------------------------------------------------------------------------|
| XP_540156.2 | PREDICTED: hypothetical protein XP_540156                                                                                                                                            |
| XP_540158.2 | PREDICTED: similar to RNA (guanine-7-) methyltransferase                                                                                                                             |
| XP_540164.2 | PREDICTED: similar to potassium voltage-gated channel, subfamily G, member 3 isoform 1 isoform 1                                                                                     |
| XP_540165.2 | PREDICTED: similar to AT rich interactive domain 5A isoform 1                                                                                                                        |
| XP_540168.2 | PREDICTED: similar to Glycerol-3-phosphate acyltransferase, mitochondrial precursor (GPAT) isoform 1                                                                                 |
| XP_540187.2 | PREDICTED: similar to Ig kappa chain V-IV region precursor                                                                                                                           |
| XP_540196.2 | PREDICTED: similar to B-cell linker                                                                                                                                                  |
| XP_540197.2 | PREDICTED: similar to Macrophage capping protein (Actin-regulatory protein CAP-G)                                                                                                    |
| XP_540198.1 | PREDICTED: similar to all-trans-13,14-dihydroretinol saturase                                                                                                                        |
| XP_540203.2 | PREDICTED: similar to catenin, alpha 2 isoform 1                                                                                                                                     |
| XP_540212.2 | PREDICTED: similar to DNA polymerase epsilon subunit 4                                                                                                                               |
| XP_540214.2 | PREDICTED: similar to semaphorin W                                                                                                                                                   |
| XP_540217.2 | PREDICTED: similar to lysyl oxidase-like 3 precursor isoform 1                                                                                                                       |
| XP_540220.2 | PREDICTED: similar to Mannosyl-oligosaccharide glucosidase (Processing A-glucosidase I)                                                                                              |
| XP_540221.2 | PREDICTED: similar to high mobility group AT-hook 1-like 4                                                                                                                           |
| XP_540225.2 | PREDICTED: similar to CXXC finger 6                                                                                                                                                  |
| XP_540229.2 | PREDICTED: similar to F-box only protein 41                                                                                                                                          |
| XP_540231.2 | PREDICTED: similar to RAB11 family interacting protein 5 (class I) isoform 1                                                                                                         |
| XP_540237.2 | PREDICTED: similar to Dysferlin (Dystrophy associated fer-1-like protein) (Fer-1 like protein 1)                                                                                     |
| XP_540257.2 | PREDICTED: similar to immunoglobulin superfamily, member 3 isoform 2                                                                                                                 |
| XP_540261.2 | PREDICTED: similar to WD-repeat protein 3                                                                                                                                            |
| XP_540265.2 | PREDICTED: similar to zinc finger protein 697                                                                                                                                        |
| XP_540278.2 | PREDICTED: similar to Protein inhibitor of activated STAT protein 3 isoform 1                                                                                                        |
| XP_540285.1 | PREDICTED: similar to H3 histone, family 2 isoform 2                                                                                                                                 |
| XP_540292.2 | PREDICTED: similar to histone 2, H2ac                                                                                                                                                |
| XP_540296.2 | PREDICTED: similar to zinc finger protein Cezanne                                                                                                                                    |
| XP_540303.2 | PREDICTED: similar to Aryl hydrocarbon receptor nuclear translocator (ARNT protein) (Dioxin receptor, nuclear translocator) (Hypoxia-inducible factor 1 beta) (HIF-1 beta) isoform 1 |
| XP_540305.1 | PREDICTED: similar to LAG1 longevity assurance homolog 2 isoform 1 isoform 1                                                                                                         |
| XP_540307.2 | PREDICTED: similar to prune homolog                                                                                                                                                  |
| XP_540309.2 | PREDICTED: similar to semaphorin 6c                                                                                                                                                  |
| XP_540313.2 | PREDICTED: similar to zinc finger protein 687                                                                                                                                        |
| XP_540315.1 | PREDICTED: similar to DNA-binding protein RFX5 (Regulatory factor X subunit 5) isoform 1                                                                                             |
| XP_540323.2 | PREDICTED: similar to RAR-related orphan receptor C isoform a                                                                                                                        |
| XP_540326.2 | PREDICTED: similar to hornerin                                                                                                                                                       |
| XP_540332.2 | PREDICTED: similar to membrane-associated guanylate kinase-related 3 isoform 2 isoform 1                                                                                             |

|             |                                                                                                                                                           |
|-------------|-----------------------------------------------------------------------------------------------------------------------------------------------------------|
| XP_540335.2 | PREDICTED: similar to protein phosphatase 1J (PP2C domain containing) isoform 1                                                                           |
| XP_540338.2 | PREDICTED: similar to wingless-type MMTV integration site family, member 2B isoform WNT-2B2                                                               |
| XP_540349.2 | PREDICTED: similar to CG15671-PA                                                                                                                          |
| XP_540379.2 | PREDICTED: similar to laminin, beta 4                                                                                                                     |
| XP_540381.2 | PREDICTED: similar to Cas-Br-M (murine) ecotropic retroviral transforming sequence-like 1                                                                 |
| XP_540384.2 | PREDICTED: similar to component of oligomeric golgi complex 5 isoform 1                                                                                   |
| XP_540385.2 | PREDICTED: similar to phosphoinositide-3-kinase, catalytic, gamma polypeptide                                                                             |
| XP_540387.2 | PREDICTED: similar to Ataxin 7-like protein 1                                                                                                             |
| XP_540396.2 | PREDICTED: similar to protein tyrosine phosphatase, non-receptor type 12                                                                                  |
| XP_540401.2 | PREDICTED: similar to low density lipoprotein B                                                                                                           |
| XP_540402.2 | PREDICTED: similar to sidekick 2                                                                                                                          |
| XP_540434.2 | PREDICTED: similar to tRNA splicing endonuclease 54 homolog (SEN54, <i>S. cerevisiae</i> )                                                                |
| XP_540435.2 | PREDICTED: similar to Myosin-15 (Myosin XV) (Unconventional myosin-15)                                                                                    |
| XP_540437.2 | PREDICTED: similar to Integrin beta-4 precursor (GP150) (CD104 antigen)                                                                                   |
| XP_540438.2 | PREDICTED: similar to unc-13 homolog D                                                                                                                    |
| XP_540440.2 | PREDICTED: similar to Fas (TNFRSF6) binding factor 1                                                                                                      |
| XP_540441.2 | PREDICTED: similar to acyl-Coenzyme A oxidase isoform a                                                                                                   |
| XP_540443.2 | PREDICTED: similar to Envoplakin (210 kDa paraneoplastic pemphigus antigen) (p210) (210 kDa cornified envelope precursor protein)                         |
| XP_540444.2 | PREDICTED: similar to galanin receptor 2                                                                                                                  |
| XP_540449.2 | PREDICTED: similar to likely ortholog of mouse ubiquitin-conjugating enzyme E2-230K                                                                       |
| XP_540453.2 | PREDICTED: similar to GalNAc alpha-2, 6-sialyltransferase I                                                                                               |
| XP_540458.2 | PREDICTED: similar to Septin-9 (MLL septin-like fusion protein) (MLL septin-like fusion protein MSF-A) (Ovarian/Breast septin) (Ov/Br septin) (Septin D1) |
| XP_540459.2 | PREDICTED: similar to trinucleotide repeat containing 6C                                                                                                  |
| XP_540460.2 | PREDICTED: similar to EVIN1                                                                                                                               |
| XP_540468.2 | PREDICTED: similar to chromobox homolog 2 isoform 1                                                                                                       |
| XP_540469.2 | PREDICTED: similar to TBC1 domain family, member 16 isoform 1                                                                                             |
| XP_540474.2 | PREDICTED: similar to chromosome 17 open reading frame 27 isoform 1                                                                                       |
| XP_540475.2 | PREDICTED: similar to Neuronal pentraxin-1 precursor (NP1) (Neuronal pentraxin I) (NP-I)                                                                  |
| XP_540480.2 | PREDICTED: similar to CG31151-PB, isoform B                                                                                                               |
| XP_540488.2 | PREDICTED: similar to prolyl 4-hydroxylase, beta subunit                                                                                                  |
| XP_540491.2 | PREDICTED: similar to pyrroline-5-carboxylate reductase 1 isoform 1                                                                                       |
| XP_540493.2 | PREDICTED: similar to CG13076-PA, isoform A                                                                                                               |
| XP_540497.2 | PREDICTED: similar to fatty acid synthase                                                                                                                 |
| XP_540501.2 | PREDICTED: similar to septin 10 isoform 1                                                                                                                 |
| XP_540506.2 | PREDICTED: similar to semaphorin 3E                                                                                                                       |
| XP_540507.2 | PREDICTED: similar to multidomain presynaptic cytomatrix protein Piccolo                                                                                  |

|             |                                                                                                                                                               |
|-------------|---------------------------------------------------------------------------------------------------------------------------------------------------------------|
| XP_540517.2 | PREDICTED: similar to beta1,4-N-acetylgalactosaminyltransferases IV                                                                                           |
| XP_540518.2 | PREDICTED: similar to Plakophilin 3                                                                                                                           |
| XP_540519.2 | PREDICTED: similar to tumor protein p53 inducible protein 5                                                                                                   |
| XP_540520.2 | PREDICTED: similar to phosphatidylserine synthase 2                                                                                                           |
| XP_540524.2 | PREDICTED: similar to CG14185-PA                                                                                                                              |
| XP_540525.2 | PREDICTED: similar to CTD-binding SR-like protein rA9                                                                                                         |
| XP_540529.2 | PREDICTED: similar to deformed epidermal autoregulatory factor 1                                                                                              |
| XP_540538.1 | PREDICTED: similar to V(D)J recombination activating protein 1 (RAG-1) (RING finger protein 74)                                                               |
| XP_540554.2 | PREDICTED: similar to CG6004-PB                                                                                                                               |
| XP_540563.2 | PREDICTED: similar to olfactory receptor 1419                                                                                                                 |
| XP_540579.2 | PREDICTED: similar to deltex 4 homolog                                                                                                                        |
| XP_540610.2 | PREDICTED: similar to RIKEN cDNA 1110030K22 isoform 4                                                                                                         |
| XP_540611.2 | PREDICTED: similar to solute carrier family 43, member 1                                                                                                      |
| XP_540615.2 | PREDICTED: similar to 182 kDa tankyrase 1-binding protein                                                                                                     |
| XP_540643.2 | PREDICTED: similar to Olfactory receptor 5M9 (Olfactory receptor OR11-190)                                                                                    |
| XP_540672.2 | PREDICTED: similar to olfactory receptor Olr577                                                                                                               |
| XP_540680.2 | PREDICTED: similar to olfactory receptor 1155                                                                                                                 |
| XP_540706.2 | PREDICTED: similar to olfactory receptor 1183                                                                                                                 |
| XP_540737.2 | PREDICTED: similar to protein tyrosine phosphatase, receptor type, J precursor                                                                                |
| XP_540741.2 | PREDICTED: similar to Kelch repeat and BTB domain containing protein 4 (BTB and kelch domain containing protein 4) isoform 1                                  |
| XP_540748.2 | PREDICTED: similar to Low-density lipoprotein receptor-related protein 4 precursor (Multiple epidermal growth factor-like domains 7)                          |
| XP_540750.2 | PREDICTED: similar to zinc finger protein 408                                                                                                                 |
| XP_540754.2 | PREDICTED: similar to WD repeat domain 5B isoform 1                                                                                                           |
| XP_540764.2 | PREDICTED: similar to synaptotagmin XIII                                                                                                                      |
| XP_540765.2 | PREDICTED: similar to PR domain containing 11                                                                                                                 |
| XP_540774.2 | PREDICTED: similar to Mucin-2 precursor (Intestinal mucin 2)                                                                                                  |
| XP_540775.2 | PREDICTED: similar to Mucin-5B precursor (Mucin 5 subtype B, tracheobronchial) (High molecular weight salivary mucin MG1) (Sublingual gland mucin)            |
| XP_540777.2 | PREDICTED: similar to Mucin-5B precursor (Mucin 5 subtype B, tracheobronchial) (High molecular weight salivary mucin MG1) (Sublingual gland mucin)            |
| XP_540789.2 | PREDICTED: similar to transient receptor potential cation channel, subfamily M, member 5                                                                      |
| XP_540790.2 | PREDICTED: similar to potassium voltage-gated channel, KQT-like subfamily, member 1 isoform 2                                                                 |
| XP_540791.2 | PREDICTED: similar to nucleosome assembly protein 1-like 4 (predicted)                                                                                        |
| XP_540792.2 | PREDICTED: similar to oxysterol-binding protein-like protein 5 isoform a                                                                                      |
| XP_540798.2 | PREDICTED: similar to SH3 and multiple ankyrin repeat domains 2 isoform 1                                                                                     |
| XP_540801.2 | PREDICTED: similar to Fibroblast growth factor-4 precursor (FGF-4) (Heparin secretory transforming protein) (HST-1) (HST) (Transforming protein KS3) (HBGF-4) |
| XP_540805.2 | PREDICTED: similar to Mas-related G-protein coupled receptor member F (Mas-related gene F protein)                                                            |
| XP_540807.2 | PREDICTED: similar to immunoglobulin mu binding protein 2                                                                                                     |

|             |                                                                                                                                                                                         |
|-------------|-----------------------------------------------------------------------------------------------------------------------------------------------------------------------------------------|
| XP_540816.2 | PREDICTED: hypothetical protein XP_540816                                                                                                                                               |
| XP_540828.2 | PREDICTED: similar to skeletal muscle specific actinin, alpha 3 isoform 1                                                                                                               |
| XP_540834.2 | PREDICTED: similar to ZK1067.4                                                                                                                                                          |
| XP_540837.2 | PREDICTED: similar to phosphofurin acidic cluster sorting protein 1                                                                                                                     |
| XP_540842.2 | PREDICTED: similar to squamous cell carcinoma antigen recognized by T cells 1                                                                                                           |
| XP_540845.2 | PREDICTED: similar to Fos-related antigen 1 (FRA-1)                                                                                                                                     |
| XP_540846.2 | PREDICTED: similar to cathepsin W preproprotein                                                                                                                                         |
| XP_540853.2 | PREDICTED: similar to mitogen-activated protein kinase kinase kinase 11                                                                                                                 |
| XP_540855.2 | PREDICTED: similar to tangerin isoform 1                                                                                                                                                |
| XP_540857.2 | PREDICTED: similar to latent transforming growth factor beta binding protein 3                                                                                                          |
| XP_540866.2 | PREDICTED: similar to Calpain-1 catalytic subunit (Calpain-1 large subunit) (Calcium-activated neutral proteinase 1) (CANP 1) (Calpain mu-type) (muCANP) (Micromolar-calpain) isoform 1 |
| XP_540871.1 | PREDICTED: similar to zinc finger protein-like 1                                                                                                                                        |
| XP_540875.2 | PREDICTED: similar to RIKEN cDNA 4933430F08                                                                                                                                             |
| XP_540887.2 | PREDICTED: similar to UNC-112 related protein 2 short form                                                                                                                              |
| XP_540888.1 | PREDICTED: similar to fibronectin leucine rich transmembrane protein 1                                                                                                                  |
| XP_540890.2 | PREDICTED: similar to Serine/threonine-protein kinase MARK2 (MAP/microtubule affinity-regulating kinase 2) (ELKL motif kinase) (EMK1) (PAR1 homolog)                                    |
| XP_540898.2 | PREDICTED: similar to solute carrier family 3 (activators of dibasic and neutral amino acid transport), member 2 isoform a                                                              |
| XP_540905.2 | PREDICTED: similar to alpha glucosidase II alpha subunit isoform 3 isoform 1                                                                                                            |
| XP_540908.2 | PREDICTED: similar to echinoderm microtubule associated protein like 3                                                                                                                  |
| XP_540910.1 | PREDICTED: similar to asparaginase-like 1 protein                                                                                                                                       |
| XP_540921.2 | PREDICTED: similar to W02H5.8                                                                                                                                                           |
| XP_540922.2 | PREDICTED: similar to cysteine rich BMP regulator 2 (chordin like)                                                                                                                      |
| XP_540925.2 | PREDICTED: similar to T-cell differentiation antigen CD6 precursor (T12) (TP120)                                                                                                        |
| XP_540929.2 | PREDICTED: similar to GRB2-associated binding protein 1 isoform a                                                                                                                       |
| XP_540934.2 | PREDICTED: similar to mastermind-like 3                                                                                                                                                 |
| XP_540937.2 | PREDICTED: similar to NMDA receptor regulated 1                                                                                                                                         |
| XP_540952.2 | PREDICTED: similar to solute carrier family 25 (mitochondrial carrier; adenine nucleotide translocator), member 31                                                                      |
| XP_540960.2 | PREDICTED: similar to spermatogenesis associated factor SPAF                                                                                                                            |
| XP_540961.2 | PREDICTED: similar to Nucleoside diphosphate-linked moiety X motif 6 (Nudix motif 6) (Protein GFG) (GFG-1) (Antisense basic fibroblast growth factor)                                   |
| XP_540963.2 | PREDICTED: similar to CG15133-PA                                                                                                                                                        |
| XP_540979.2 | PREDICTED: similar to Glutamate dehydrogenase 1, mitochondrial precursor (GDH)                                                                                                          |
| XP_540981.2 | PREDICTED: similar to heparan sulfate 6-O-sulfotransferase                                                                                                                              |
| XP_540990.2 | PREDICTED: similar to Myc box dependent interacting protein 1 (Bridging integrator 1) (Amphiphysin-like protein) (Amphiphysin II) (Box-dependent myc-interacting protein-1)             |
| XP_541005.2 | PREDICTED: similar to dudulin 2 isoform a                                                                                                                                               |

|             |                                                                                                                                                                         |
|-------------|-------------------------------------------------------------------------------------------------------------------------------------------------------------------------|
| XP_541006.1 | PREDICTED: similar to Cerebellin 2 precursor (Cerebellin-like protein)                                                                                                  |
| XP_541013.2 | PREDICTED: similar to Nck-associated protein 5                                                                                                                          |
| XP_541029.1 | PREDICTED: similar to Zinc finger homeobox protein 1b (Smad interacting protein 1) (SMADIP1)                                                                            |
| XP_541030.2 | PREDICTED: similar to methyl-CpG binding domain protein 5 isoform 1                                                                                                     |
| XP_541043.2 | PREDICTED: similar to par-6 partitioning defective 6 homolog gamma                                                                                                      |
| XP_541049.2 | PREDICTED: similar to Zinc finger protein 236                                                                                                                           |
| XP_541050.2 | PREDICTED: similar to Zinc finger protein 516                                                                                                                           |
| XP_541055.2 | PREDICTED: similar to neuropilin- and tolloid-like protein 1 isoform 3 precursor                                                                                        |
| XP_541060.2 | PREDICTED: similar to rotatin                                                                                                                                           |
| XP_541063.2 | PREDICTED: similar to expressed in non-metastatic cells 1, protein (NM23A) (nucleoside diphosphate kinase)                                                              |
| XP_541069.2 | PREDICTED: similar to cadherin 7, type 2 preproprotein                                                                                                                  |
| XP_541077.2 | PREDICTED: similar to Tumor necrosis factor receptor superfamily member 11A precursor (Receptor activator of NF-KB) (Osteoclast differentiation factor receptor) (ODFR) |
| XP_541086.2 | PREDICTED: similar to heart alpha-kinase                                                                                                                                |
| XP_541091.2 | PREDICTED: similar to CTCL tumor antigen se57-1                                                                                                                         |
| XP_541094.2 | PREDICTED: similar to Netrin receptor DCC precursor (Tumor suppressor protein DCC) (Colorectal cancer suppressor)                                                       |
| XP_541100.2 | PREDICTED: hypothetical protein XP_541100                                                                                                                               |
| XP_541108.2 | PREDICTED: similar to eyes absent 4 isoform d isoform 1                                                                                                                 |
| XP_541116.2 | PREDICTED: similar to Bcl-2-associated transcription factor 1 (Btf) isoform 1                                                                                           |
| XP_541124.2 | PREDICTED: similar to CG5937-PA                                                                                                                                         |
| XP_541130.2 | PREDICTED: similar to G protein-coupled receptor 126 beta 1 isoform 1                                                                                                   |
| XP_541139.2 | PREDICTED: similar to laforin isoform a                                                                                                                                 |
| XP_541140.1 | PREDICTED: similar to F-box only protein 30                                                                                                                             |
| XP_541143.2 | PREDICTED: similar to CaLPain family member (clp-2)                                                                                                                     |
| XP_541152.2 | PREDICTED: similar to Pleckstrin homology domain containing family G member 1                                                                                           |
| XP_541154.2 | PREDICTED: similar to nesprin 1 isoform beta                                                                                                                            |
| XP_541162.2 | PREDICTED: similar to T-cell lymphoma invasion and metastasis 2 isoform a                                                                                               |
| XP_541164.2 | PREDICTED: similar to AT rich interactive domain 1B (SWI1-like) isoform 1                                                                                               |
| XP_541169.2 | PREDICTED: similar to synaptojanin 2                                                                                                                                    |
| XP_541178.2 | PREDICTED: similar to fibronectin type III domain containing 1                                                                                                          |
| XP_541201.2 | PREDICTED: similar to Afadin (Af-6 protein)                                                                                                                             |
| XP_541203.2 | PREDICTED: similar to FERM domain containing 1                                                                                                                          |
| XP_541211.2 | PREDICTED: similar to karyopherin alpha 5 (importin alpha 6)                                                                                                            |
| XP_541212.1 | PREDICTED: similar to G protein-coupled receptor, family C, group 6, member A isoform 1                                                                                 |
| XP_541213.2 | PREDICTED: similar to regulatory factor X domain containing 1                                                                                                           |
| XP_541215.2 | PREDICTED: similar to Ros1 proto-oncogene                                                                                                                               |
| XP_541216.2 | PREDICTED: similar to Discoidin, CUB and LCCL domain containing protein 1 precursor                                                                                     |

|             |                                                                                                                                                                                                       |
|-------------|-------------------------------------------------------------------------------------------------------------------------------------------------------------------------------------------------------|
| XP_541221.2 | PREDICTED: similar to minichromosome maintenance protein domain containing 1                                                                                                                          |
| XP_541226.2 | PREDICTED: similar to CG10237-PB, isoform B                                                                                                                                                           |
| XP_541235.2 | PREDICTED: similar to C34E11.3                                                                                                                                                                        |
| XP_541237.2 | PREDICTED: hypothetical protein XP_541237                                                                                                                                                             |
| XP_541250.2 | PREDICTED: similar to hyaluronan binding protein 4                                                                                                                                                    |
| XP_541275.2 | PREDICTED: similar to riboflavin kinase                                                                                                                                                               |
| XP_541276.2 | PREDICTED: similar to Proprotein convertase subtilisin/kexin type 5 precursor (Proprotein convertase PC5) (Subtilisin/kexin-like protease PC5) (PC6) (Subtilisin-like proprotein convertase 6) (SPC6) |
| XP_541280.2 | PREDICTED: similar to Nuclear receptor ROR-beta (Nuclear receptor RZR-beta)                                                                                                                           |
| XP_541284.2 | PREDICTED: similar to transmembrane channel-like gene family 1                                                                                                                                        |
| XP_541285.2 | PREDICTED: similar to guanine deaminase                                                                                                                                                               |
| XP_541287.2 | PREDICTED: similar to transmembrane protein 2                                                                                                                                                         |
| XP_541299.2 | PREDICTED: similar to RNA cyclase homolog                                                                                                                                                             |
| XP_541301.2 | PREDICTED: similar to Tyrosine-protein kinase JAK2 (Janus kinase 2) (JAK-2) isoform 1                                                                                                                 |
| XP_541303.2 | PREDICTED: similar to CG9063-PA                                                                                                                                                                       |
| XP_541326.2 | PREDICTED: similar to WNK lysine deficient protein kinase 2                                                                                                                                           |
| XP_541329.2 | PREDICTED: similar to FYVE, RhoGEF and PH domain containing protein 3 (Zinc finger FYVE domain containing protein 5)                                                                                  |
| XP_541330.2 | PREDICTED: similar to bicaudal D homolog 2 isoform 1                                                                                                                                                  |
| XP_541332.2 | PREDICTED: similar to Isoleucyl-tRNA synthetase, cytoplasmic (Isoleucine--tRNA ligase) (IleRS) (IRS)                                                                                                  |
| XP_541333.2 | PREDICTED: similar to zinc finger protein 484 isoform a                                                                                                                                               |
| XP_541342.2 | PREDICTED: similar to zinc finger protein 132 (clone pHZ-12)                                                                                                                                          |
| XP_541346.2 | PREDICTED: similar to Alpha-1B-glycoprotein precursor (Alpha-1-B glycoprotein)                                                                                                                        |
| XP_541354.2 | PREDICTED: similar to Zinc finger protein 606 (Zinc finger protein 328)                                                                                                                               |
| XP_541379.2 | PREDICTED: similar to zinc finger protein 91 (HPF7, HTF10)                                                                                                                                            |
| XP_541390.2 | PREDICTED: similar to Zinc finger protein 62 homolog (Zfp-62) (ZT3)                                                                                                                                   |
| XP_541404.2 | PREDICTED: similar to ret finger protein-like 3                                                                                                                                                       |
| XP_541407.2 | PREDICTED: similar to Flt3 interacting zinc finger protein 1                                                                                                                                          |
| XP_541408.2 | PREDICTED: similar to zinc finger protein 579                                                                                                                                                         |
| XP_541414.2 | PREDICTED: similar to CG10289-PA isoform 1                                                                                                                                                            |
| XP_541415.2 | PREDICTED: similar to protein tyrosine phosphatase, receptor type, H precursor                                                                                                                        |
| XP_541420.2 | PREDICTED: similar to NACHT-, LRR- and PYD-containing protein 2 (PYRIN-containing APAF1-like protein 2) (Nucleotide-binding site protein 1)                                                           |
| XP_541427.2 | PREDICTED: similar to leukocyte receptor cluster (LRC) member 4 protein                                                                                                                               |
| XP_541444.2 | PREDICTED: similar to zinc finger protein 15-like 1 (KOX 8)                                                                                                                                           |
| XP_541449.2 | PREDICTED: similar to zinc finger protein 665                                                                                                                                                         |
| XP_541451.2 | PREDICTED: similar to alpha isoform of regulatory subunit A, protein phosphatase 2 isoform 1                                                                                                          |
| XP_541457.2 | PREDICTED: similar to Zinc finger protein 208                                                                                                                                                         |

|             |                                                                                                                                                                                                                                                                        |
|-------------|------------------------------------------------------------------------------------------------------------------------------------------------------------------------------------------------------------------------------------------------------------------------|
| XP_541475.2 | PREDICTED: similar to SH3 and multiple ankyrin repeat domains protein 1 (Shank1) (GKAP/SAPAP interacting protein) (SPANK-1) (Synamon) (Somatostatin receptor interacting protein) (SSTR interacting protein) (SSTRIP)                                                  |
| XP_541477.2 | PREDICTED: similar to leucine rich repeat containing 4B                                                                                                                                                                                                                |
| XP_541482.2 | PREDICTED: similar to Serine/threonine-protein kinase VRK3 (Vaccinia-related kinase 3) isoform 1                                                                                                                                                                       |
| XP_541486.2 | PREDICTED: similar to Interleukin-4 induced protein 1 precursor (Fig-1 protein) (hFIG1)                                                                                                                                                                                |
| XP_541488.2 | PREDICTED: similar to polynucleotide kinase 3-phosphatase isoform 1                                                                                                                                                                                                    |
| XP_541490.2 | PREDICTED: similar to Adapter-related protein complex 2 alpha 1 subunit (Alpha-adaptin A) (Adaptor protein complex AP-2 alpha-1 subunit) (Clathrin assembly protein complex 2 alpha-A large chain) (100 kDa coated vesicle protein A) (Plasma membrane adaptor HA2/... |
| XP_541491.2 | PREDICTED: similar to serine arginine-rich pre-mRNA splicing factor SR-A1                                                                                                                                                                                              |
| XP_541492.2 | PREDICTED: similar to CG17233-PA, isoform A                                                                                                                                                                                                                            |
| XP_541502.2 | PREDICTED: similar to PTPRF interacting protein alpha 3                                                                                                                                                                                                                |
| XP_541503.2 | PREDICTED: similar to U1 small nuclear ribonucleoprotein 70 kDa                                                                                                                                                                                                        |
| XP_541504.1 | PREDICTED: similar to potassium voltage-gated channel, shaker-related subfamily, member 7                                                                                                                                                                              |
| XP_541505.2 | PREDICTED: similar to Glycogen [starch] synthase, muscle                                                                                                                                                                                                               |
| XP_541510.2 | PREDICTED: similar to Fibroblast growth factor-21 precursor (FGF-21)                                                                                                                                                                                                   |
| XP_541512.2 | PREDICTED: similar to Ras-interacting protein 1 isoform 1                                                                                                                                                                                                              |
| XP_541516.2 | PREDICTED: similar to sphingosine kinase type 2 isoform                                                                                                                                                                                                                |
| XP_541520.2 | PREDICTED: similar to Glutamate [NMDA] receptor subunit epsilon 4 precursor (N-methyl D-aspartate receptor subtype 2D) (NR2D) (NMDAR2D)                                                                                                                                |
| XP_541524.2 | PREDICTED: similar to CG5020-PA, isoform A                                                                                                                                                                                                                             |
| XP_541532.2 | PREDICTED: similar to EH-domain containing 2                                                                                                                                                                                                                           |
| XP_541534.2 | PREDICTED: similar to zinc finger protein 541                                                                                                                                                                                                                          |
| XP_541535.2 | PREDICTED: similar to Sodium/calcium exchanger 2 precursor (Na <sup>+</sup> )/Ca <sup>2+</sup> -exchange protein 2)                                                                                                                                                    |
| XP_541541.1 | PREDICTED: similar to fukutin-related protein                                                                                                                                                                                                                          |
| XP_541544.2 | PREDICTED: similar to Prostacyclin receptor (Prostanoid IP receptor) (PGI receptor) (Prostaglandin I2 receptor)                                                                                                                                                        |
| XP_541545.2 | PREDICTED: similar to coiled-coil domain containing 8                                                                                                                                                                                                                  |
| XP_541546.1 | PREDICTED: similar to prohibitin                                                                                                                                                                                                                                       |
| XP_541557.2 | PREDICTED: similar to OPA3 protein isoform b                                                                                                                                                                                                                           |
| XP_541562.2 | PREDICTED: similar to TFIIH basal transcription factor complex helicase subunit (DNA-repair protein complementing XP-D cells) (Xeroderma pigmentosum group D complementing protein) (CXPB) (DNA excision repair protein ERCC-2)                                        |
| XP_541566.2 | PREDICTED: similar to NTPase, KAP family P-loop domain containing 1                                                                                                                                                                                                    |
| XP_541569.2 | PREDICTED: similar to reticuloendotheliosis viral oncogene homolog B                                                                                                                                                                                                   |
| XP_541571.2 | PREDICTED: similar to Lutheran blood group glycoprotein precursor (B-CAM cell surface glycoprotein) (Auberger B antigen) (F8/G253 antigen)                                                                                                                             |
| XP_541576.2 | PREDICTED: similar to Zinc finger protein 208                                                                                                                                                                                                                          |
| XP_541578.2 | PREDICTED: similar to Zinc finger protein 45 (BRC1744)                                                                                                                                                                                                                 |
| XP_541584.2 | PREDICTED: similar to pleckstrin homology-like domain, family B, member 3                                                                                                                                                                                              |
| XP_541588.2 | PREDICTED: similar to Multiple EGF-like-domain protein 4                                                                                                                                                                                                               |
| XP_541589.2 | PREDICTED: similar to capicua homolog                                                                                                                                                                                                                                  |

|             |                                                                                                              |
|-------------|--------------------------------------------------------------------------------------------------------------|
| XP_541591.2 | PREDICTED: similar to zinc finger protein 526                                                                |
| XP_541596.2 | PREDICTED: similar to Rho guanine nucleotide exchange factor 1 isoform 2, partial                            |
| XP_541602.2 | PREDICTED: similar to branched chain keto acid dehydrogenase E1, alpha polypeptide isoform 1                 |
| XP_541604.2 | PREDICTED: similar to AXL receptor tyrosine kinase isoform 1 isoform 1                                       |
| XP_541613.2 | PREDICTED: similar to Spectrin beta chain, brain 3 (Spectrin, non-erythroid beta chain 3) (Beta-IV spectrin) |
| XP_541615.2 | PREDICTED: similar to Periaxin                                                                               |
| XP_541617.2 | PREDICTED: hypothetical protein XP_541617                                                                    |
| XP_541618.2 | PREDICTED: similar to mitogen-activated protein kinase kinase kinase 10                                      |
| XP_541619.2 | PREDICTED: similar to Fc fragment of IgG binding protein                                                     |
| XP_541623.2 | PREDICTED: similar to pleckstrin homology domain containing, family G (with RhoGef domain) member 2          |
| XP_541626.2 | PREDICTED: similar to leucine rich repeat and fibronectin type III domain containing 1                       |
| XP_541652.2 | PREDICTED: similar to Zinc finger protein 208                                                                |
| XP_541661.2 | PREDICTED: similar to zinc finger protein 91 (HPF7, HTF10)                                                   |
| XP_541674.2 | PREDICTED: similar to zinc finger protein 91 (HPF7, HTF10) isoform 1                                         |
| XP_541675.2 | PREDICTED: similar to zinc finger protein 567 isoform 1                                                      |
| XP_541680.2 | PREDICTED: similar to CLIP-170-related protein                                                               |
| XP_541690.2 | PREDICTED: hypothetical protein XP_541690                                                                    |
| XP_541691.2 | PREDICTED: similar to testis zinc finger protein                                                             |
| XP_541695.2 | PREDICTED: similar to LISCH protein isoform 2                                                                |
| XP_541709.2 | PREDICTED: similar to potassium channel tetramerisation domain containing 15                                 |
| XP_541710.2 | PREDICTED: similar to carbohydrate (N-acetylgalactosamine 4-O) sulfotransferase 8                            |
| XP_541713.2 | PREDICTED: similar to Asc-type amino acid transporter 1 (Asc-1)                                              |
| XP_541714.2 | PREDICTED: similar to low density lipoprotein receptor-related protein 3                                     |
| XP_541721.2 | PREDICTED: similar to teashirt 3                                                                             |
| XP_541723.2 | PREDICTED: similar to zinc finger protein 536                                                                |
| XP_541726.2 | PREDICTED: similar to pleckstrin homology domain containing, family F (with FYVE domain) member 1            |
| XP_541728.2 | PREDICTED: hypothetical protein XP_541728                                                                    |
| XP_541732.2 | PREDICTED: similar to carbohydrate (chondroitin 4) sulfotransferase 13                                       |
| XP_541736.2 | PREDICTED: similar to minichromosome maintenance protein 2                                                   |
| XP_541737.2 | PREDICTED: similar to endoglycan                                                                             |
| XP_541739.2 | PREDICTED: similar to CG6224-PA                                                                              |
| XP_541741.1 | PREDICTED: similar to H1 histone family, member X                                                            |
| XP_541746.2 | PREDICTED: similar to nucleoporin 210                                                                        |
| XP_541748.2 | PREDICTED: similar to fibulin 2 precursor, isoform a                                                         |
| XP_541752.2 | PREDICTED: similar to Glutamate receptor interacting protein 2 (GRIP2 protein) isoform 1                     |
| XP_541755.2 | PREDICTED: similar to nuclear receptor subfamily 2, group C, member 2                                        |



|             |                                                                                                                                                                          |
|-------------|--------------------------------------------------------------------------------------------------------------------------------------------------------------------------|
| XP_541759.2 | PREDICTED: hypothetical protein XP_541759                                                                                                                                |
| XP_541772.2 | PREDICTED: similar to interleukin-1 receptor-associated kinase 2                                                                                                         |
| XP_541780.2 | PREDICTED: similar to calcium/calmodulin-dependent protein kinase I                                                                                                      |
| XP_541796.2 | PREDICTED: similar to sulfatase modifying factor 1                                                                                                                       |
| XP_541808.2 | PREDICTED: similar to FERM domain containing protein 4B                                                                                                                  |
| XP_541817.2 | PREDICTED: similar to ataxin 7 isoform 1                                                                                                                                 |
| XP_541822.2 | PREDICTED: similar to protein tyrosine phosphatase, receptor type, G precursor                                                                                           |
| XP_541826.2 | PREDICTED: similar to Acyl-coenzyme A oxidase 2, peroxisomal (Branched-chain acyl-CoA oxidase) (BRCAox) (Trihydroxycoprostanoyl-CoA oxidase) (THCCox) (THCA-CoA oxidase) |
| XP_541830.2 | PREDICTED: similar to 2-phosphodiesterase                                                                                                                                |
| XP_541831.2 | PREDICTED: similar to axonemal dynein heavy chain 7                                                                                                                      |
| XP_541835.2 | PREDICTED: similar to interleukin 17 receptor D                                                                                                                          |
| XP_541839.2 | PREDICTED: similar to choline dehydrogenase                                                                                                                              |
| XP_541851.2 | PREDICTED: similar to Stabilin-1 precursor (FEEL-1 protein) (MS-1 antigen)                                                                                               |
| XP_541852.1 | PREDICTED: similar to semaphorin sem2                                                                                                                                    |
| XP_541858.2 | PREDICTED: similar to dual specificity phosphatase 7 isoform 1                                                                                                           |
| XP_541859.2 | PREDICTED: similar to abhydrolase domain containing 14A                                                                                                                  |
| XP_541869.2 | PREDICTED: similar to RNA binding motif protein 15B                                                                                                                      |
| XP_541878.2 | PREDICTED: similar to semaphorin 3B isoform 1 precursor                                                                                                                  |
| XP_541885.2 | PREDICTED: similar to bassoon                                                                                                                                            |
| XP_541890.2 | PREDICTED: similar to cAMP-dependent protein kinase type II-alpha regulatory subunit isoform 1                                                                           |
| XP_541893.2 | PREDICTED: similar to 6-phosphofructo-2-kinase/fructose-2,6-biphosphatase 4                                                                                              |
| XP_541897.2 | PREDICTED: similar to Microtubule-associated protein 4 (MAP 4) isoform 1                                                                                                 |
| XP_541900.2 | PREDICTED: similar to CG1332-PA                                                                                                                                          |
| XP_541910.2 | PREDICTED: similar to solute carrier family 6, member 20 isoform 1                                                                                                       |
| XP_541911.2 | PREDICTED: similar to suppressor of actin 1 isoform 1                                                                                                                    |
| XP_541913.2 | PREDICTED: similar to CUB domain-containing protein 1 isoform 1                                                                                                          |
| XP_541920.2 | PREDICTED: similar to Cartilage intermediate layer protein 2 precursor (CILP-2)                                                                                          |
| XP_541921.2 | PREDICTED: similar to apolipoprotein A-I binding protein                                                                                                                 |
| XP_541939.2 | PREDICTED: similar to Pyroglutamyl-peptidase I (Pyrrolidone-carboxylate peptidase) (5-oxopropyl-peptidase) (PGP-I)                                                       |
| XP_541941.2 | PREDICTED: similar to KIAA1683                                                                                                                                           |
| XP_541949.2 | PREDICTED: similar to Unc-13 homolog A (Munc13-1)                                                                                                                        |
| XP_541953.2 | PREDICTED: similar to plasmalemma vesicle associated protein                                                                                                             |
| XP_541954.2 | PREDICTED: similar to GTP binding protein 3 (mitochondrial) isoform V isoform 1                                                                                          |
| XP_541955.2 | PREDICTED: similar to CG15270-PA, isoform A                                                                                                                              |
| XP_541956.2 | PREDICTED: similar to abhydrolase domain containing 8                                                                                                                    |

|             |                                                                                                                                                                               |
|-------------|-------------------------------------------------------------------------------------------------------------------------------------------------------------------------------|
| XP_541960.2 | PREDICTED: similar to myosin IXB isoform 1                                                                                                                                    |
| XP_541962.2 | PREDICTED: similar to Proteinase activated receptor 4 precursor (PAR-4) (Thrombin receptor-like 3) (Coagulation factor II receptor-like 3)                                    |
| XP_541963.2 | PREDICTED: similar to cofactor required for Sp1 transcriptional activation, subunit 7, 70kDa                                                                                  |
| XP_541964.2 | PREDICTED: similar to solute carrier family 35, member E1                                                                                                                     |
| XP_541971.2 | PREDICTED: similar to Olfactory receptor 10H2                                                                                                                                 |
| XP_542024.2 | PREDICTED: similar to MHC class II regulatory factor RFX1 (RFX) (Enhancer factor C) (EF-C)                                                                                    |
| XP_542025.2 | PREDICTED: hypothetical protein XP_542025                                                                                                                                     |
| XP_542030.1 | PREDICTED: similar to CG11334-PB, isoform B                                                                                                                                   |
| XP_542044.2 | PREDICTED: similar to Hook homolog 2 (h-hook2) (hHK2)                                                                                                                         |
| XP_542048.2 | PREDICTED: similar to Lysosomal alpha-mannosidase precursor (Mannosidase, alpha B) (Lysosomal acid alpha-mannosidase) (Laman) (Mannosidase alpha class 2B member 1) isoform 1 |
| XP_542053.1 | PREDICTED: similar to calponin 1, basic, smooth muscle isoform 1                                                                                                              |
| XP_542069.1 | PREDICTED: similar to APG4 autophagy 4 homolog D isoform 1                                                                                                                    |
| XP_542074.2 | PREDICTED: similar to intercellular adhesion molecule 5 precursor                                                                                                             |
| XP_542077.2 | PREDICTED: similar to Complement C3 precursor                                                                                                                                 |
| XP_542078.2 | PREDICTED: similar to Collagen alpha 3(V) chain precursor                                                                                                                     |
| XP_542087.2 | PREDICTED: similar to zinc finger protein 74                                                                                                                                  |
| XP_542093.2 | PREDICTED: similar to zinc finger protein 317                                                                                                                                 |
| XP_542108.2 | PREDICTED: similar to Insulin receptor precursor (IR) (CD220 antigen)                                                                                                         |
| XP_542114.2 | PREDICTED: similar to Purkinje cell protein 2                                                                                                                                 |
| XP_542119.2 | PREDICTED: similar to CG11727-PA, isoform A                                                                                                                                   |
| XP_542120.2 | PREDICTED: hypothetical protein XP_542120                                                                                                                                     |
| XP_542121.2 | PREDICTED: similar to leucine rich repeat containing 8 family, member E                                                                                                       |
| XP_542123.2 | PREDICTED: similar to Import inner membrane translocase subunit TIM44, mitochondrial precursor                                                                                |
| XP_542124.2 | PREDICTED: similar to Fibrillin-3 precursor                                                                                                                                   |
| XP_542129.2 | PREDICTED: similar to myosin IF                                                                                                                                               |
| XP_542134.2 | PREDICTED: similar to Vav proto-oncogene                                                                                                                                      |
| XP_542135.2 | PREDICTED: similar to SH2 domain containing 3A                                                                                                                                |
| XP_542137.2 | PREDICTED: similar to CG18659-PA, isoform A                                                                                                                                   |
| XP_542140.2 | PREDICTED: similar to KH-type splicing regulatory protein (FUSE binding protein 2)                                                                                            |
| XP_542144.2 | PREDICTED: similar to dihydrouridine synthase 3-like                                                                                                                          |
| XP_542146.2 | PREDICTED: similar to scaffold attachment factor B                                                                                                                            |
| XP_542148.2 | PREDICTED: similar to protein tyrosine phosphatase, receptor type, sigma isoform 2 precursor                                                                                  |
| XP_542153.2 | PREDICTED: similar to semaphorin 6B isoform 3 precursor                                                                                                                       |
| XP_542158.2 | PREDICTED: similar to CG4751-PA                                                                                                                                               |
| XP_542162.2 | PREDICTED: similar to ankyrin repeat domain 24                                                                                                                                |

|             |                                                                                                                                                                                                                                                                        |
|-------------|------------------------------------------------------------------------------------------------------------------------------------------------------------------------------------------------------------------------------------------------------------------------|
| XP_542163.2 | PREDICTED: similar to Mono-ADP-ribosyltransferase sirtuin-6 (SIR2-like protein 6)                                                                                                                                                                                      |
| XP_542166.2 | PREDICTED: similar to Zinc finger and BTB domain containing protein 7 (Leukemia/lymphoma related factor) (Factor that binds to inducer of short transcripts protein 1) (Factor binding IST protein 1) (FBI-1) (HIV-1 1st-binding protein 1) (TTF-I interacting pept... |
| XP_542170.2 | PREDICTED: similar to mitochondrial ribosomal protein L54                                                                                                                                                                                                              |
| XP_542171.2 | PREDICTED: similar to amyloid beta (A4) precursor protein-binding, family A, member 3                                                                                                                                                                                  |
| XP_542173.2 | PREDICTED: similar to CG1676-PA                                                                                                                                                                                                                                        |
| XP_542175.2 | PREDICTED: similar to PDZ domain protein GIPC3                                                                                                                                                                                                                         |
| XP_542179.2 | PREDICTED: similar to Nuclear factor 1 C-type (Nuclear factor 1/C) (NF1-C) (NFI-C) (NF-I/C) (CCAAT-box binding transcription factor) (CTF) (TGGCA-binding protein)                                                                                                     |
| XP_542180.2 | PREDICTED: similar to nicalin                                                                                                                                                                                                                                          |
| XP_542188.2 | PREDICTED: similar to Lamin B2                                                                                                                                                                                                                                         |
| XP_542195.2 | PREDICTED: similar to Kruppel-like factor 16                                                                                                                                                                                                                           |
| XP_542200.2 | PREDICTED: similar to thrombospondin, type I, domain containing 6                                                                                                                                                                                                      |
| XP_542202.2 | PREDICTED: similar to adenomatosis polyposis coli 2                                                                                                                                                                                                                    |
| XP_542205.2 | PREDICTED: similar to midnolin isoform 1                                                                                                                                                                                                                               |
| XP_542206.2 | PREDICTED: similar to Serine/threonine-protein kinase 11 (Serine/threonine-protein kinase LKB1)                                                                                                                                                                        |
| XP_542207.2 | PREDICTED: similar to KIAA0963                                                                                                                                                                                                                                         |
| XP_542208.2 | PREDICTED: similar to ATP-binding cassette, sub-family A, member 7 isoform b                                                                                                                                                                                           |
| XP_542210.2 | PREDICTED: similar to glutamate receptor, ionotropic, N-methyl-D-aspartate 3B                                                                                                                                                                                          |
| XP_542214.2 | PREDICTED: similar to plasticity-related protein 2                                                                                                                                                                                                                     |
| XP_542219.2 | PREDICTED: similar to ring finger protein 126 isoform 2                                                                                                                                                                                                                |
| XP_542220.2 | PREDICTED: similar to DNA-directed RNA polymerase, mitochondrial precursor (MtRPOL)                                                                                                                                                                                    |
| XP_542222.2 | PREDICTED: similar to nuclear localized factor 1                                                                                                                                                                                                                       |
| XP_542227.2 | PREDICTED: similar to Contactin 5 precursor (Neural recognition molecule NB-2) (hNB-2)                                                                                                                                                                                 |
| XP_542237.2 | PREDICTED: similar to Probable endonuclease KIAA0830 precursor                                                                                                                                                                                                         |
| XP_542238.2 | PREDICTED: similar to jumonji domain containing 2D                                                                                                                                                                                                                     |
| XP_542240.2 | PREDICTED: similar to angiomin like 1                                                                                                                                                                                                                                  |
| XP_542241.2 | PREDICTED: similar to piwi-like 4                                                                                                                                                                                                                                      |
| XP_542288.2 | PREDICTED: similar to potassium channel tetramerisation domain containing 14                                                                                                                                                                                           |
| XP_542291.2 | PREDICTED: similar to glycerophosphodiester phosphodiesterase domain containing 4                                                                                                                                                                                      |
| XP_542292.2 | PREDICTED: similar to myosin VIIA                                                                                                                                                                                                                                      |
| XP_542293.2 | PREDICTED: similar to Calpain-5 (nCL-3) (htra-3) isoform 1                                                                                                                                                                                                             |
| XP_542297.2 | PREDICTED: similar to Olfactory guanylyl cyclase GC-D precursor (Guanylate cyclase, olfactory)                                                                                                                                                                         |
| XP_542316.2 | PREDICTED: similar to phosphoglucomutase 2-like 1                                                                                                                                                                                                                      |
| XP_542321.2 | PREDICTED: similar to P2Y purinoceptor 2 (P2Y2) (P2U purinoceptor 1) (P2U1) (ATP receptor) (Purinergic receptor)                                                                                                                                                       |
| XP_542327.2 | PREDICTED: similar to inositol polyphosphate phosphatase-like 1 isoform 1                                                                                                                                                                                              |
| XP_542330.1 | PREDICTED: similar to leucine rich repeat containing 51                                                                                                                                                                                                                |

|             |                                                                                                                                                                                                   |
|-------------|---------------------------------------------------------------------------------------------------------------------------------------------------------------------------------------------------|
| XP_542331.2 | PREDICTED: similar to Nuclear mitotic apparatus protein 1 (NuMA protein) (SP-H antigen)                                                                                                           |
| XP_542338.2 | PREDICTED: similar to Ssu72 RNA polymerase II CTD phosphatase homolog                                                                                                                             |
| XP_542344.2 | PREDICTED: similar to 52 kDa Ro protein (Sjogren syndrome type A antigen) (SS-A) (Ro(SS-A)) (52 kDa ribonucleoprotein autoantigen Ro/SS-A) (Tripartite motif protein 21) (RING finger protein 81) |
| XP_542356.1 | PREDICTED: similar to Olfactory receptor 51E2 (G-protein coupled receptor RA1c)                                                                                                                   |
| XP_542374.2 | PREDICTED: similar to Hemoglobin epsilon chain                                                                                                                                                    |
| XP_542392.2 | PREDICTED: similar to CG14224-PA                                                                                                                                                                  |
| XP_542409.2 | PREDICTED: similar to olfactory receptor 655                                                                                                                                                      |
| XP_542452.1 | PREDICTED: similar to sphingomyelin phosphodiesterase 1, acid lysosomal isoform 1 precursor isoform 1                                                                                             |
| XP_542453.2 | PREDICTED: similar to CG17150-PA, isoform A                                                                                                                                                       |
| XP_542466.2 | PREDICTED: similar to olfactory receptor 41                                                                                                                                                       |
| XP_542482.2 | PREDICTED: similar to NACHT, LRR and PYD containing protein 14                                                                                                                                    |
| XP_542483.2 | PREDICTED: similar to synaptotagmin IX                                                                                                                                                            |
| XP_542507.2 | PREDICTED: similar to JAW1-related protein isoform a                                                                                                                                              |
| XP_542517.2 | PREDICTED: similar to phosphoinositide-3-kinase, class 2, alpha polypeptide isoform 1                                                                                                             |
| XP_542530.2 | PREDICTED: similar to neuron navigator 2 isoform 2                                                                                                                                                |
| XP_542534.2 | PREDICTED: similar to Isocitrate dehydrogenase [NAD] subunit gamma, mitochondrial precursor (Isocitric dehydrogenase) (NAD(+)-specific ICDH)                                                      |
| XP_542544.1 | PREDICTED: similar to Kinesin family member 18A                                                                                                                                                   |
| XP_542552.2 | PREDICTED: hypothetical protein XP_542552                                                                                                                                                         |
| XP_542553.2 | PREDICTED: similar to guanylate cyclase 1, soluble, beta 2                                                                                                                                        |
| XP_542559.2 | PREDICTED: similar to CLLL8 protein                                                                                                                                                               |
| XP_542567.1 | PREDICTED: similar to L-lactate dehydrogenase A chain (LDH-A) (LDH muscle subunit) (LDH-M) (Proliferation-inducing gene 19 protein)                                                               |
| XP_542572.2 | PREDICTED: similar to Protein KIAA0853                                                                                                                                                            |
| XP_542575.1 | PREDICTED: similar to potassium channel tetramerisation domain containing 4                                                                                                                       |
| XP_542588.2 | PREDICTED: similar to Protocadherin 8 precursor (Arcadlin) isoform 1                                                                                                                              |
| XP_542610.2 | PREDICTED: similar to KIAA1008                                                                                                                                                                    |
| XP_542613.2 | PREDICTED: similar to TBC1 domain family member 4 (Akt substrate of 160 kDa) (AS160)                                                                                                              |
| XP_542614.2 | PREDICTED: similar to Potassium channel tetramerisation domain containing protein 12 (Pfetin) (Predominantly fetal expressed T1 domain)                                                           |
| XP_542630.1 | PREDICTED: similar to slit and trk like 6                                                                                                                                                         |
| XP_542640.2 | PREDICTED: similar to dTDP-D-glucose 4,6-dehydratase                                                                                                                                              |
| XP_542647.2 | PREDICTED: similar to RAN binding protein 5 isoform 1                                                                                                                                             |
| XP_542654.2 | PREDICTED: similar to voltage gated channel like 1                                                                                                                                                |
| XP_542663.2 | PREDICTED: similar to DNA ligase IV                                                                                                                                                               |
| XP_542665.2 | PREDICTED: similar to myosin heavy chain Myr 8                                                                                                                                                    |
| XP_542667.2 | PREDICTED: similar to insulin receptor substrate 2                                                                                                                                                |
| XP_542673.2 | PREDICTED: similar to mcf.2 transforming sequence-like                                                                                                                                            |

|             |                                                                                                                                   |
|-------------|-----------------------------------------------------------------------------------------------------------------------------------|
| XP_542683.2 | PREDICTED: similar to Ectonucleoside triphosphate diphosphohydrolase 6 (NTPDase6) (CD39 antigen-like 2)                           |
| XP_542701.2 | PREDICTED: similar to leucine rich repeat (in FLII) interacting protein 2 isoform 1 isoform 1                                     |
| XP_542704.2 | PREDICTED: similar to Villin-like protein                                                                                         |
| XP_542709.1 | PREDICTED: similar to Activin receptor type IIB precursor (ACTR-IIB)                                                              |
| XP_542714.2 | PREDICTED: similar to tetratricopeptide repeat domain 21A                                                                         |
| XP_542725.2 | PREDICTED: similar to zinc finger protein 91 (HPF7, HTF10)                                                                        |
| XP_542747.2 | PREDICTED: similar to source of immunodominant MHC-associated peptides isoform 1                                                  |
| XP_542748.2 | PREDICTED: similar to glutamate decarboxylase-like 1                                                                              |
| XP_542755.2 | PREDICTED: similar to eomesodermin isoform 1                                                                                      |
| XP_542768.2 | PREDICTED: similar to EF hand domain family, member B                                                                             |
| XP_542770.2 | PREDICTED: similar to DNA-binding protein SATB1 (Special AT-rich sequence binding protein 1)                                      |
| XP_542771.2 | PREDICTED: similar to TBC1 domain family member 5                                                                                 |
| XP_542772.2 | PREDICTED: similar to phospholipase C-like 2 isoform 1                                                                            |
| XP_542777.2 | PREDICTED: similar to SH3 domain-binding protein 5 (SH3 domain-binding protein that preferentially associates with BTK)           |
| XP_542778.2 | PREDICTED: similar to alpha 3 type VI collagen isoform 4 precursor                                                                |
| XP_542781.2 | PREDICTED: similar to copine IV                                                                                                   |
| XP_542783.2 | PREDICTED: similar to DnaJ homolog subfamily C member 13                                                                          |
| XP_542789.2 | PREDICTED: similar to angiomin like 2                                                                                             |
| XP_542790.2 | PREDICTED: similar to kyphoscoliosis                                                                                              |
| XP_542792.2 | PREDICTED: similar to alpha isoform of regulatory subunit B, protein phosphatase 2 isoform 1 isoform 1                            |
| XP_542793.2 | PREDICTED: similar to ring finger protein 184                                                                                     |
| XP_542802.2 | PREDICTED: similar to SRY-box 14                                                                                                  |
| XP_542803.2 | PREDICTED: similar to Alpha-1,4-N-acetylglucosaminyltransferase (Alpha4GnT)                                                       |
| XP_542808.2 | PREDICTED: similar to forkhead box L2                                                                                             |
| XP_542815.2 | PREDICTED: similar to CG1271-PA, isoform A                                                                                        |
| XP_542817.2 | PREDICTED: similar to I-plastin (Intestine-specific plastin) (Plastin-1)                                                          |
| XP_542821.2 | PREDICTED: similar to carbohydrate (N-acetylglucosamine-6-O) sulfotransferase 2                                                   |
| XP_542854.2 | PREDICTED: similar to Short stature homeobox protein 2 (Paired-related homeobox protein SHOT) (Homeobox protein Oig12X) isoform 1 |
| XP_542863.2 | PREDICTED: similar to surfeit 6                                                                                                   |
| XP_542865.2 | PREDICTED: similar to forkhead box A2                                                                                             |
| XP_542870.2 | PREDICTED: similar to GTPase activating Rap/RanGAP domain-like 1 isoform 2                                                        |
| XP_542882.2 | PREDICTED: similar to kinesin-like motor protein C20orf23                                                                         |
| XP_542894.1 | PREDICTED: similar to McKusick-Kaufman/Bardet-Biedl syndromes putative chaperonin isoform 1                                       |
| XP_542895.2 | PREDICTED: similar to Serine/threonine-protein kinase PAK 7 (p21-activated kinase 7) (PAK-7) (PAK-5) isoform 1                    |
| XP_542896.2 | PREDICTED: similar to phosphoinositide-specific phospholipase C beta 1 isoform a                                                  |
| XP_542899.2 | PREDICTED: similar to neuronal leucine rich repeat-4                                                                              |

|             |                                                                                                                                                                                                                                                                         |
|-------------|-------------------------------------------------------------------------------------------------------------------------------------------------------------------------------------------------------------------------------------------------------------------------|
| XP_542900.2 | PREDICTED: similar to CGI-09 protein                                                                                                                                                                                                                                    |
| XP_542909.2 | PREDICTED: similar to Alpha-1D adrenergic receptor (Alpha 1D-adrenoceptor) (Alpha 1D-adrenoreceptor) (Alpha-1A adrenergic receptor) (Alpha adrenergic receptor 1a)                                                                                                      |
| XP_542917.2 | PREDICTED: similar to sialoadhesin precursor                                                                                                                                                                                                                            |
| XP_542919.2 | PREDICTED: similar to solute carrier family 4 member 11                                                                                                                                                                                                                 |
| XP_542921.2 | PREDICTED: similar to ProSAPiP1 protein isoform 1                                                                                                                                                                                                                       |
| XP_542936.2 | PREDICTED: similar to Syntaphilin                                                                                                                                                                                                                                       |
| XP_542937.2 | PREDICTED: similar to Proprotein convertase subtilisin/kexin type 6 precursor (Paired basic amino acid cleaving enzyme 4) (Subtilisin/kexin-like protease PACE4) (Subtilisin-like proprotein convertase 4) (SPC4)                                                       |
| XP_542942.2 | PREDICTED: similar to ubiquitin conjugating enzyme 7 interacting protein 3 isoform 2                                                                                                                                                                                    |
| XP_542950.2 | PREDICTED: similar to forkhead-like 18                                                                                                                                                                                                                                  |
| XP_542951.2 | PREDICTED: similar to XK-related protein 7                                                                                                                                                                                                                              |
| XP_542955.2 | PREDICTED: similar to Protein C20orf112                                                                                                                                                                                                                                 |
| XP_542958.2 | PREDICTED: similar to bactericidal/permeability-increasing protein-like 1                                                                                                                                                                                               |
| XP_542975.2 | PREDICTED: similar to centrosomal protein 2                                                                                                                                                                                                                             |
| XP_542977.2 | PREDICTED: similar to otoferlin                                                                                                                                                                                                                                         |
| XP_542979.2 | PREDICTED: similar to erythrocyte protein band 4.1-like 1 isoform L                                                                                                                                                                                                     |
| XP_542980.2 | PREDICTED: similar to Myosin regulatory light chain 2, smooth muscle isoform (Myosin RLC) (LC20)                                                                                                                                                                        |
| XP_542984.2 | PREDICTED: similar to C34E11.3                                                                                                                                                                                                                                          |
| XP_542992.2 | PREDICTED: similar to quattro                                                                                                                                                                                                                                           |
| XP_543001.2 | PREDICTED: similar to elastin microfibril interfacer 3                                                                                                                                                                                                                  |
| XP_543005.2 | PREDICTED: similar to ganglioside-induced differentiation-associated protein 1-like 1 isoform 1                                                                                                                                                                         |
| XP_543022.2 | PREDICTED: similar to Ubiquitin-conjugating enzyme E2 C (Ubiquitin-protein ligase C) (Ubiquitin carrier protein C) (UbcH10) isoform 1                                                                                                                                   |
| XP_543028.2 | PREDICTED: similar to zinc finger protein 335                                                                                                                                                                                                                           |
| XP_543033.2 | PREDICTED: similar to thyrotropin-releasing hormone receptor                                                                                                                                                                                                            |
| XP_543035.2 | PREDICTED: similar to solute carrier family 2 member 10                                                                                                                                                                                                                 |
| XP_543039.2 | PREDICTED: similar to Nuclear receptor coactivator 3 (NCoA-3) (Thyroid hormone receptor activator molecule 1) (TRAM-1) (ACTR) (Receptor-associated coactivator 3) (RAC-3) (Amplified in breast cancer-1 protein) (AIB-1) (Steroid receptor coactivator protein 3) (...) |
| XP_543041.2 | PREDICTED: similar to Phosphatidylinositol 3,4,5-trisphosphate-dependent Rac exchanger 1 protein (P-Rex1 protein)                                                                                                                                                       |
| XP_543044.2 | PREDICTED: similar to Beta-1,4-galactosyltransferase 5 (Beta-1,4-GalTase 5) (Beta4Gal-T5) (b4Gal-T5) (UDP-galactose:beta-N-acetylglucosamine beta-1,4-galactosyltransferase 5) (UDP-Gal:beta-GlcNAc beta-1,4-galactosyltransferase 5) (Beta-1,4-GalT II)...             |
| XP_543047.2 | PREDICTED: similar to Spermatogenesis associated protein 2 (Spermatogenesis associated protein PD1)                                                                                                                                                                     |
| XP_543050.2 | PREDICTED: similar to Partitioning defective-6 homolog beta (PAR-6 beta) (PAR-6B)                                                                                                                                                                                       |
| XP_543052.1 | PREDICTED: similar to Molybdenum cofactor synthesis protein 3 (Molybdopterin synthase sulfurylase) (MPT synthase sulfurylase)                                                                                                                                           |
| XP_543054.2 | PREDICTED: similar to preexisting nuclear factor of activated T-cells 2 isoform C                                                                                                                                                                                       |
| XP_543055.2 | PREDICTED: similar to sal-like 4                                                                                                                                                                                                                                        |
| XP_543056.2 | PREDICTED: similar to zinc finger protein 64 isoform c isoform 1                                                                                                                                                                                                        |
| XP_543057.2 | PREDICTED: similar to serologically defined colon cancer antigen 33 like                                                                                                                                                                                                |

|             |                                                                                                                                                                                     |
|-------------|-------------------------------------------------------------------------------------------------------------------------------------------------------------------------------------|
| XP_543075.2 | PREDICTED: similar to beta tubulin 1, class VI                                                                                                                                      |
| XP_543079.2 | PREDICTED: similar to Cadherin-like protein 26 precursor (Cadherin-like protein VR20)                                                                                               |
| XP_543081.2 | PREDICTED: similar to COLLAGEN family member (col-162)                                                                                                                              |
| XP_543082.2 | PREDICTED: similar to Protein FAM61B                                                                                                                                                |
| XP_543085.2 | PREDICTED: hypothetical protein XP_543085                                                                                                                                           |
| XP_543090.2 | PREDICTED: similar to death associated transcription factor 1 isoform c                                                                                                             |
| XP_543091.2 | PREDICTED: similar to Putative transporter C20orf59                                                                                                                                 |
| XP_543096.2 | PREDICTED: similar to Protein KIAA1510 precursor                                                                                                                                    |
| XP_543097.2 | PREDICTED: similar to Neuronal acetylcholine receptor protein, alpha-4 subunit precursor                                                                                            |
| XP_543098.2 | PREDICTED: similar to Peroxisomal proliferator-activated receptor A interacting complex 285 kDa protein (PPAR-alpha interacting complex protein 285)                                |
| XP_543104.2 | PREDICTED: similar to SLC2A4 regulator                                                                                                                                              |
| XP_543105.2 | PREDICTED: similar to BTB (POZ) domain containing 4                                                                                                                                 |
| XP_543108.2 | PREDICTED: similar to Hypothetical zinc finger protein KIAA1196                                                                                                                     |
| XP_543112.2 | PREDICTED: similar to Myelin transcription factor 1 (MYT1) (MYTI) (Proteolipid protein binding protein) (PLPB1)                                                                     |
| XP_543115.2 | PREDICTED: similar to Tubulin alpha-4 chain (Alpha-tubulin 4) (Alpha-tubulin isotype M-alpha-4)                                                                                     |
| XP_543127.2 | PREDICTED: similar to Fras1 related extracellular matrix protein 2                                                                                                                  |
| XP_543139.2 | PREDICTED: similar to androgen-induced prostate proliferative shutoff associated protein isoform 1                                                                                  |
| XP_543145.2 | PREDICTED: similar to chromosome 13 open reading frame 22                                                                                                                           |
| XP_543149.2 | PREDICTED: similar to ZK180.5b                                                                                                                                                      |
| XP_543150.2 | PREDICTED: similar to PABP1-dependent poly A-specific ribonuclease subunit PAN3                                                                                                     |
| XP_543157.1 | PREDICTED: similar to PDZ domain containing ring finger 1                                                                                                                           |
| XP_543181.1 | PREDICTED: similar to Centromere protein J (Centrosomal P4.1-associated protein) (LAG-3-associated protein) (LYST-interacting protein 1)                                            |
| XP_543182.2 | PREDICTED: similar to tudor domain containing 4, partial                                                                                                                            |
| XP_543201.2 | PREDICTED: similar to a disintegrin and metalloproteinase domain 29 isoform 1 preproprotein                                                                                         |
| XP_543204.2 | PREDICTED: similar to nei-like 2                                                                                                                                                    |
| XP_543208.2 | PREDICTED: similar to XK-related protein 6                                                                                                                                          |
| XP_543211.2 | PREDICTED: similar to Retinitis pigmentosa 1-like 1 protein (Retinitis pigmentosa 1-like protein 1)                                                                                 |
| XP_543220.2 | PREDICTED: similar to zinc finger protein 395                                                                                                                                       |
| XP_543225.2 | PREDICTED: similar to scavenger receptor class A, member 3 isoform 1                                                                                                                |
| XP_543230.2 | PREDICTED: similar to Vacuolar ATP synthase subunit D (V-ATPase D subunit) (Vacuolar proton pump D subunit) (V-ATPase 28 kDa accessory protein)                                     |
| XP_543233.2 | PREDICTED: similar to Dihydropyrimidinase related protein-2 (DRP-2) (Turned on after division, 64 kDa protein) (TOAD-64) (Collapsin response mediator protein 2) (CRMP-2) isoform 2 |
| XP_543237.2 | PREDICTED: similar to Neurofilament triplet M protein (160 kDa neurofilament protein) (Neurofilament medium polypeptide) (NF-M) (Neurofilament 3)                                   |
| XP_543243.2 | PREDICTED: similar to Ectonucleoside triphosphate diphosphohydrolase 4 (NTPDase4) (Uridine-diphosphatase) (UDPase) (Lysosomal apyrase-like protein of 70 kDa)                       |
| XP_543248.2 | PREDICTED: similar to p30 DBC protein                                                                                                                                               |
| XP_543256.2 | PREDICTED: similar to hairless protein isoform a                                                                                                                                    |

|             |                                                                                                                                                                                          |
|-------------|------------------------------------------------------------------------------------------------------------------------------------------------------------------------------------------|
| XP_543257.2 | PREDICTED: similar to retinoic acid induced 16                                                                                                                                           |
| XP_543258.2 | PREDICTED: similar to Dematin (Erythrocyte membrane protein band 4.9)                                                                                                                    |
| XP_543259.2 | PREDICTED: similar to docking protein 2 isoform a                                                                                                                                        |
| XP_543262.1 | PREDICTED: similar to leucine zipper, putative tumor suppressor 1 isoform 1                                                                                                              |
| XP_543263.2 | PREDICTED: similar to ATPase, H <sup>+</sup> transporting, V1 subunit B, isoform 2 isoform 1                                                                                             |
| XP_543268.2 | PREDICTED: similar to zinc finger protein 596                                                                                                                                            |
| XP_543270.2 | PREDICTED: hypothetical protein XP_543270                                                                                                                                                |
| XP_543273.2 | PREDICTED: similar to myosin heavy chain Myr 8                                                                                                                                           |
| XP_543277.2 | PREDICTED: similar to solute carrier family 19, member 3                                                                                                                                 |
| XP_543283.2 | PREDICTED: similar to G protein-coupled receptor 55                                                                                                                                      |
| XP_543301.2 | PREDICTED: similar to ankyrin repeat and SOCS box-containing 18                                                                                                                          |
| XP_543306.2 | PREDICTED: similar to period 2 isoform 1                                                                                                                                                 |
| XP_543308.2 | PREDICTED: similar to Ankyrin repeat and SOCS box protein 1 (ASB-1)                                                                                                                      |
| XP_543323.2 | PREDICTED: similar to ankyrin repeat and MYND domain containing 1 isoform 1                                                                                                              |
| XP_543329.2 | PREDICTED: similar to transmembrane protein 16G isoform NGEP long                                                                                                                        |
| XP_543330.2 | PREDICTED: similar to FERM, RhoGEF and pleckstrin domain protein 2                                                                                                                       |
| XP_543339.2 | PREDICTED: similar to transmembrane protein 7                                                                                                                                            |
| XP_543344.2 | PREDICTED: similar to zinc finger protein 26 (KOX 20)                                                                                                                                    |
| XP_543346.2 | PREDICTED: similar to Bcl-XL-binding protein v68                                                                                                                                         |
| XP_543348.2 | PREDICTED: similar to DNA polymerase epsilon catalytic subunit                                                                                                                           |
| XP_543350.1 | PREDICTED: similar to nucleolar complex associated 4 homolog                                                                                                                             |
| XP_543352.2 | PREDICTED: similar to E1A binding protein p400 (p400 kDa SWI2/SNF2-related protein) (Domino homolog) (hDomino) (CAG repeat protein 32) (Trinucleotide repeat-containing gene 12 protein) |
| XP_543356.2 | PREDICTED: similar to RIM binding protein 2 (RIM-BP2) isoform 1                                                                                                                          |
| XP_543369.2 | PREDICTED: similar to CG1842-PA                                                                                                                                                          |
| XP_543370.2 | PREDICTED: similar to ATPase, H <sup>+</sup> transporting, lysosomal V0 subunit a isoform 2 isoform 1                                                                                    |
| XP_543376.2 | PREDICTED: similar to Huntingtin interacting protein 1 related (Hip1-related)                                                                                                            |
| XP_543379.2 | PREDICTED: similar to Kinetochores-associated protein 1 (Rough deal homolog) (hRod) (HsROD) (Rod)                                                                                        |
| XP_543380.2 | PREDICTED: similar to beta-1,3-N-acetylglucosaminyltransferase bGnT-4                                                                                                                    |
| XP_543393.2 | PREDICTED: similar to cut-like 2                                                                                                                                                         |
| XP_543397.2 | PREDICTED: similar to BRCA1 associated protein                                                                                                                                           |
| XP_543402.2 | PREDICTED: similar to Deltex protein 1 (Deltex-1) (Deltex1) (hDXTX1)                                                                                                                     |
| XP_543407.2 | PREDICTED: similar to serine dehydratase                                                                                                                                                 |
| XP_543433.2 | PREDICTED: similar to piwi like homolog 1                                                                                                                                                |
| XP_543435.2 | PREDICTED: similar to Mevalonate kinase (MK)                                                                                                                                             |
| XP_543444.2 | PREDICTED: similar to Coronin-1C (Coronin-3) (hCRNN4)                                                                                                                                    |



|             |                                                                                                                                                                                |
|-------------|--------------------------------------------------------------------------------------------------------------------------------------------------------------------------------|
| XP_543448.2 | PREDICTED: similar to CG9164-PA, isoform A isoform 2                                                                                                                           |
| XP_543453.2 | PREDICTED: similar to beta adrenergic receptor kinase 2                                                                                                                        |
| XP_543454.2 | PREDICTED: similar to Myosin-18B (Myosin XVIIIb)                                                                                                                               |
| XP_543455.2 | PREDICTED: similar to Seizure 6-like protein precursor                                                                                                                         |
| XP_543461.2 | PREDICTED: similar to meningioma 1                                                                                                                                             |
| XP_543463.2 | PREDICTED: similar to TPR repeat containing protein KIAA1043 isoform 1                                                                                                         |
| XP_543475.2 | PREDICTED: similar to myotubularin-related protein 3 isoform c                                                                                                                 |
| XP_543486.2 | PREDICTED: similar to Phosphatidylinositol 4,5-bisphosphate 5-phosphatase A isoform 1                                                                                          |
| XP_543487.2 | PREDICTED: similar to Group III secretory phospholipase A2 precursor (Phosphatidylcholine 2-acylhydrolase GIII) (GIII sPLA2)                                                   |
| XP_543490.2 | PREDICTED: similar to HGFL protein isoform 1                                                                                                                                   |
| XP_543491.2 | PREDICTED: similar to zinc finger protein 278 long C isoform isoform 1                                                                                                         |
| XP_543492.2 | PREDICTED: similar to Eukaryotic translation initiation factor 4E transporter (eIF4E transporter) (4E-T) (Eukaryotic translation initiation factor 4E nuclear import factor 1) |
| XP_543494.1 | PREDICTED: similar to ribosomal protein L10                                                                                                                                    |
| XP_543506.2 | PREDICTED: similar to Ig lambda chain V-I region BL2 precursor                                                                                                                 |
| XP_543515.2 | PREDICTED: similar to Ig lambda chain V-I region BL2 precursor                                                                                                                 |
| XP_543527.2 | PREDICTED: similar to gamma-glutamyltransferase-like activity 1                                                                                                                |
| XP_543529.2 | PREDICTED: similar to Calcineurin-binding protein Cabin 1 (Calcineurin inhibitor) (CAIN)                                                                                       |
| XP_543543.2 | PREDICTED: similar to Armadillo repeat protein deleted in velo-cardio-facial syndrome isoform 1                                                                                |
| XP_543551.2 | PREDICTED: similar to DiGeorge syndrome critical region protein 14                                                                                                             |
| XP_543566.2 | PREDICTED: similar to apoptosis-inducing factor like isoform 1                                                                                                                 |
| XP_543570.2 | PREDICTED: similar to Hypermethylated in cancer 2 protein (Hic-2) (Hic-3) (HIC1-related gene on chromosome 22) (Zinc finger and BTB domain containing protein 30)              |
| XP_543574.2 | PREDICTED: similar to Ca(2+)/calmodulin-dependent protein kinase phosphatase (CaM-kinase phosphatase) (CaMKPase) (Partner of PIX 2) (hFEM-2) (Protein phosphatase 1F)          |
| XP_543600.2 | PREDICTED: similar to Immunoglobulin lambda-like polypeptide 1 precursor (Immunoglobulin-related 14.1 protein) (Immunoglobulin omega polypeptide) (Lambda 5) (CD179b antigen)  |
| XP_543619.2 | PREDICTED: similar to Integrin alpha-5 precursor (Fibronectin receptor alpha subunit) (Integrin alpha-F) (VLA-5) (CD49e)                                                       |
| XP_543626.2 | PREDICTED: similar to Homeobox protein Hox-C10                                                                                                                                 |
| XP_543631.2 | PREDICTED: similar to coiled-coil transcriptional coactivator                                                                                                                  |
| XP_543635.2 | PREDICTED: similar to Zinc finger protein 148 (Zinc finger DNA binding protein 89) (Transcription factor ZBP-89)                                                               |
| XP_543637.2 | PREDICTED: similar to sterol O-acyltransferase 2                                                                                                                               |
| XP_543640.2 | PREDICTED: similar to keratin 5b                                                                                                                                               |
| XP_543641.2 | PREDICTED: similar to keratin 6L                                                                                                                                               |
| XP_543646.2 | PREDICTED: similar to keratin protein K6irs                                                                                                                                    |
| XP_543647.2 | PREDICTED: similar to keratin 6 irs4                                                                                                                                           |
| XP_543650.2 | PREDICTED: similar to cytokeratin type II                                                                                                                                      |
| XP_543651.2 | PREDICTED: similar to keratin complex 2, basic, gene 20                                                                                                                        |
| XP_543652.1 | PREDICTED: similar to Keratin, type II cuticular Hb4 (Hair keratin, type II Hb4) isoform 1                                                                                     |

|             |                                                                                                                                                                                                                                        |
|-------------|----------------------------------------------------------------------------------------------------------------------------------------------------------------------------------------------------------------------------------------|
| XP_543653.2 | PREDICTED: similar to keratin, hair, basic, 5                                                                                                                                                                                          |
| XP_543654.2 | PREDICTED: similar to keratin, hair, basic, 5                                                                                                                                                                                          |
| XP_543656.2 | PREDICTED: similar to type II keratin Kb26                                                                                                                                                                                             |
| XP_543657.2 | PREDICTED: similar to type II keratin Kb21 isoform 1                                                                                                                                                                                   |
| XP_543659.2 | PREDICTED: similar to type II keratin Kb21                                                                                                                                                                                             |
| XP_543660.2 | PREDICTED: similar to type II keratin Kb20                                                                                                                                                                                             |
| XP_543663.2 | PREDICTED: similar to activin A type IB receptor isoform a precursor                                                                                                                                                                   |
| XP_543665.2 | PREDICTED: similar to bridging integrator 2                                                                                                                                                                                            |
| XP_543669.2 | PREDICTED: similar to solute carrier family 11 (proton-coupled divalent metal ion transporters), member 2                                                                                                                              |
| XP_543670.2 | PREDICTED: similar to UbiE-YGHL1 fusion protein                                                                                                                                                                                        |
| XP_543680.2 | PREDICTED: hypothetical protein XP_543680                                                                                                                                                                                              |
|             | PREDICTED: similar to Potassium voltage-gated channel subfamily H member 3 (Voltage-gated potassium channel subunit Kv12.2) (Ether-a-go-go like potassium channel 2) (ELK channel 2) (ELK2) (Brain-specific eag-like channel 1) (BEC1) |
| XP_543682.2 |                                                                                                                                                                                                                                        |
| XP_543683.2 | PREDICTED: similar to RIKEN cDNA 2810451A06                                                                                                                                                                                            |
| XP_543684.2 | PREDICTED: similar to Myeloid/lymphoid or mixed-lineage leukemia protein 2 (ALL1-related protein)                                                                                                                                      |
| XP_543686.2 | PREDICTED: similar to Wnt-1 proto-oncogene protein precursor                                                                                                                                                                           |
| XP_543687.2 | PREDICTED: similar to wingless-type MMTV integration site family, member 10B precursor                                                                                                                                                 |
| XP_543689.2 | PREDICTED: similar to Voltage-dependent L-type calcium channel beta-3 subunit (CAB3) (Calcium channel, voltage-dependent, beta 3 subunit)                                                                                              |
| XP_543690.2 | PREDICTED: similar to cyclin T1                                                                                                                                                                                                        |
| XP_543711.1 | PREDICTED: similar to Olfactory receptor 10AD1                                                                                                                                                                                         |
| XP_543714.2 | PREDICTED: similar to Vitamin D3 receptor (VDR) (1,25-dihydroxyvitamin D3 receptor)                                                                                                                                                    |
| XP_543719.2 | PREDICTED: similar to Protein C20orf81 homolog                                                                                                                                                                                         |
| XP_543731.2 | PREDICTED: similar to PDZ domain containing RING finger protein 4 (Ligand of Numb-protein X 4) (SEMACAP3-like protein)                                                                                                                 |
| XP_543734.2 | PREDICTED: similar to leucine-rich repeat kinase 2                                                                                                                                                                                     |
| XP_543735.2 | PREDICTED: similar to solute carrier family 2 (facilitated glucose transporter), member 13                                                                                                                                             |
| XP_543739.2 | PREDICTED: similar to plakophilin 2 isoform 2a isoform 1                                                                                                                                                                               |
| XP_543770.2 | PREDICTED: similar to solute carrier family 7 (cationic amino acid transporter, y+ system), member 3                                                                                                                                   |
| XP_543791.2 | PREDICTED: similar to receptor-type protein tyrosine phosphatase O isoform a precursor                                                                                                                                                 |
| XP_543801.2 | PREDICTED: similar to activating transcription factor 7 interacting protein isoform 1                                                                                                                                                  |
| XP_543826.1 | PREDICTED: similar to Apolipoprotein B mRNA editing enzyme (APOBEC-1) (HEPR)                                                                                                                                                           |
|             | PREDICTED: similar to Heterogeneous nuclear ribonucleoprotein A1 (Helix-destabilizing protein) (Single-strand binding protein) (hnRNP core protein A1) (HDP-1) (Topoisomerase-inhibitor suppressed)                                    |
| XP_543834.2 |                                                                                                                                                                                                                                        |
| XP_543836.2 | PREDICTED: similar to CD163 antigen isoform a                                                                                                                                                                                          |
| XP_543843.2 | PREDICTED: similar to B-cell receptor-associated protein 37                                                                                                                                                                            |
|             | PREDICTED: similar to Tyrosine-protein phosphatase, non-receptor type 6 (Protein-tyrosine phosphatase 1C) (PTP-1C) (Hematopoietic cell protein-tyrosine phosphatase) (SH-PTP1) (Protein-tyrosine phosphatase SHP-1)                    |
| XP_543844.2 |                                                                                                                                                                                                                                        |
| XP_543846.2 | PREDICTED: similar to leprecan-like 2 isoform 1                                                                                                                                                                                        |

|             |                                                                                                                                                                               |
|-------------|-------------------------------------------------------------------------------------------------------------------------------------------------------------------------------|
| XP_543853.2 | PREDICTED: similar to Vesicle-associated membrane protein 1 (VAMP-1) (Synaptobrevin 1)                                                                                        |
| XP_543866.2 | PREDICTED: hypothetical protein XP_543866                                                                                                                                     |
| XP_543876.2 | PREDICTED: hypothetical protein XP_543876                                                                                                                                     |
| XP_543883.2 | PREDICTED: similar to Wnt-5b protein precursor isoform 1                                                                                                                      |
| XP_543886.2 | PREDICTED: similar to interleukin 17 receptor precursor                                                                                                                       |
| XP_543888.2 | PREDICTED: similar to Protein MICAL-3                                                                                                                                         |
| XP_543889.2 | PREDICTED: similar to Tubulin alpha-8 chain (Alpha-tubulin 8)                                                                                                                 |
| XP_543892.2 | PREDICTED: similar to solute carrier family 7 (cationic amino acid transporter, $\gamma^+$ system), member 3                                                                  |
| XP_543895.2 | PREDICTED: similar to FERM and PDZ domain containing 2 isoform 3                                                                                                              |
| XP_543897.2 | PREDICTED: similar to WD repeat and FYVE domain containing 3                                                                                                                  |
| XP_543902.2 | PREDICTED: similar to Choline O-acetyltransferase (CHOACTase) (Choline acetylase) (ChAT)                                                                                      |
| XP_543905.2 | PREDICTED: similar to olfactory receptor, family 13, subfamily A, member 1                                                                                                    |
| XP_543914.2 | PREDICTED: similar to chondroitin beta1,4 N-acetylgalactosaminyltransferase 2 isoform 1                                                                                       |
| XP_543924.2 | PREDICTED: similar to HECT domain containing 2 isoform a                                                                                                                      |
| XP_543929.2 | PREDICTED: similar to TATA-binding-protein-associated factor 172 (TBP-associated factor 172) (TAF-172) (TAF(II)170) (B-TFIID transcription factor-associated 170 kDa subunit) |
| XP_543936.2 | PREDICTED: similar to transmembrane protein 20                                                                                                                                |
| XP_543938.2 | PREDICTED: similar to helicase, lymphoid-specific isoform 1                                                                                                                   |
| XP_543943.2 | PREDICTED: similar to B-cell linker                                                                                                                                           |
| XP_543944.2 | PREDICTED: similar to DNA nucleotidyltransferase (Terminal addition enzyme) (Terminal deoxynucleotidyltransferase) (Terminal transferase) isoform 1                           |
| XP_543945.2 | PREDICTED: similar to tolloid-like 2                                                                                                                                          |
| XP_543947.2 | PREDICTED: similar to Slit homolog 1 protein precursor (Slit-1) (Multiple epidermal growth factor-like domains 4)                                                             |
| XP_543953.2 | PREDICTED: similar to phosphatidylinositol 4-kinase type II                                                                                                                   |
| XP_543963.1 | PREDICTED: similar to aspartate aminotransferase 1 isoform 1                                                                                                                  |
| XP_543967.2 | PREDICTED: similar to Polycystic kidney disease 2-like 1 protein (Polycystin-L) (Polycystin 2 homolog)                                                                        |
| XP_543974.1 | PREDICTED: similar to twinkle                                                                                                                                                 |
| XP_543981.2 | PREDICTED: similar to F-box and WD-40 domain protein 4                                                                                                                        |
| XP_543989.2 | PREDICTED: similar to pleckstrin and Sec7 domain containing                                                                                                                   |
| XP_543990.2 | PREDICTED: similar to F-box and leucine-rich repeat protein 15                                                                                                                |
| XP_543995.2 | PREDICTED: similar to Arsenite methyltransferase (S-adenosyl-L-methionine:arsenic(III) methyltransferase) (Methylarsonite methyltransferase) (Cyt19)                          |
| XP_543999.1 | PREDICTED: similar to internexin neuronal intermediate filament protein, alpha isoform 1                                                                                      |
| XP_544001.1 | PREDICTED: similar to Protein C6orf78 homolog                                                                                                                                 |
| XP_544004.2 | PREDICTED: similar to SH3 multiple domains 1                                                                                                                                  |
| XP_544007.2 | PREDICTED: similar to CG17687-PA                                                                                                                                              |
| XP_544029.2 | PREDICTED: hypothetical protein XP_544029                                                                                                                                     |
| XP_544030.2 | PREDICTED: similar to TruB pseudouridine (psi) synthase homolog 1                                                                                                             |

|             |                                                                                                                                                                                     |
|-------------|-------------------------------------------------------------------------------------------------------------------------------------------------------------------------------------|
| XP_544039.2 | PREDICTED: similar to PDZ domain containing 8                                                                                                                                       |
| XP_544045.2 | PREDICTED: similar to G protein-coupled receptor kinase 5 (G protein-coupled receptor kinase GRK5)                                                                                  |
| XP_544046.2 | PREDICTED: similar to BAG-family molecular chaperone regulator-3 (BCL-2 binding athanogene-3) (BAG-3) (Bcl-2-binding protein Bis) (Docking protein CAIR-1)                          |
| XP_544051.2 | PREDICTED: similar to deleted in malignant brain tumors 1 isoform b precursor                                                                                                       |
| XP_544052.2 | PREDICTED: similar to deleted in malignant brain tumors 1 isoform a precursor                                                                                                       |
| XP_544058.2 | PREDICTED: similar to B cell RAG associated protein                                                                                                                                 |
| XP_544064.2 | PREDICTED: similar to Deducator of cytokinesis protein 1 (180 kDa protein downstream of CRK) (DOCK180)                                                                              |
| XP_544072.2 | PREDICTED: similar to Gamma-1-syntrophin (G1SYN) (Syntrophin 4) (SYN4)                                                                                                              |
| XP_544073.2 | PREDICTED: similar to CG12002-PA, isoform A                                                                                                                                         |
| XP_544076.2 | PREDICTED: similar to suppression of tumorigenicity 18                                                                                                                              |
| XP_544087.2 | PREDICTED: similar to PeroxireDoXin family member (prdx-6)                                                                                                                          |
| XP_544091.1 | PREDICTED: similar to Cytochrome P450 7A1 (Cholesterol 7-alpha-monooxygenase) (CYPVII) (Cholesterol 7-alpha-hydroxylase)                                                            |
| XP_544097.2 | PREDICTED: similar to chromodomain helicase DNA binding protein 7 isoform 1                                                                                                         |
| XP_544109.2 | PREDICTED: similar to valosin containing protein (p97)/p47 complex interacting protein 1                                                                                            |
| XP_544113.2 | PREDICTED: similar to DEP domain containing 2 isoform a                                                                                                                             |
| XP_544116.2 | PREDICTED: similar to vesicle transport through interaction with t-SNAREs 1B                                                                                                        |
| XP_544134.1 | PREDICTED: similar to hepatocyte nuclear factor 4, gamma                                                                                                                            |
| XP_544136.2 | PREDICTED: similar to Peroxisome assembly factor-1 (PAF-1) (Peroxin-2) (Peroxisomal membrane protein 3) (35 kDa peroxisomal membrane protein) (RING finger protein 72)              |
| XP_544163.2 | PREDICTED: similar to Copine-3 (Copine III)                                                                                                                                         |
| XP_544178.2 | PREDICTED: similar to CG15923-PA                                                                                                                                                    |
| XP_544195.2 | PREDICTED: similar to heat shock protein 1, beta                                                                                                                                    |
| XP_544201.2 | PREDICTED: similar to Frizzled 8 precursor (Frizzled-8) (Fz-8) (mFz8)                                                                                                               |
| XP_544223.2 | PREDICTED: similar to dachshund b                                                                                                                                                   |
| XP_544234.2 | PREDICTED: similar to myosin IIIA                                                                                                                                                   |
| XP_544240.1 | PREDICTED: similar to NOL1/NOP2/Sun domain family, member 6 isoform 1                                                                                                               |
| XP_544242.2 | PREDICTED: similar to mannose receptor, C type 1-like 1                                                                                                                             |
| XP_544256.1 | PREDICTED: similar to minichromosome maintenance protein 10 isoform 2                                                                                                               |
| XP_544267.2 | PREDICTED: similar to 6-phosphofructo-2-kinase/fructose-2,6-biphosphatase 3 (6PF-2-K/Fru-2,6-P2ASE brain-type isozyme) (RB2K)                                                       |
| XP_544270.2 | PREDICTED: similar to F-box only protein, helicase, 18 isoform 1                                                                                                                    |
| XP_544275.2 | PREDICTED: similar to neuroepithelial cell transforming gene 1                                                                                                                      |
| XP_544281.2 | PREDICTED: similar to Double-stranded RNA-specific editase B2 (dsRNA adenosine deaminase B2) (RNA dependent adenosine deaminase 3) (RNA editing deaminase 2) (RNA editing enzyme 2) |
| XP_544287.2 | PREDICTED: similar to Transcriptional activator protein PUR-alpha (Purine-rich single-stranded DNA-binding protein alpha)                                                           |
| XP_544297.1 | PREDICTED: similar to Protocadherin beta 2 precursor (PCDH-beta2)                                                                                                                   |
| XP_544306.1 | PREDICTED: similar to Protocadherin beta 15 precursor (PCDH-beta15)                                                                                                                 |
| XP_544317.2 | PREDICTED: similar to protocadherin 1 isoform 2 precursor                                                                                                                           |

|             |                                                                                                                                                                  |
|-------------|------------------------------------------------------------------------------------------------------------------------------------------------------------------|
| XP_544318.2 | PREDICTED: similar to CG10221-PA                                                                                                                                 |
| XP_544319.2 | PREDICTED: similar to Protocadherin 12 precursor (Vascular cadherin-2) (Vascular endothelial cadherin-2) (VE-cadherin-2) (VE-cad-2)                              |
| XP_544320.2 | PREDICTED: similar to sprouty homolog 4                                                                                                                          |
| XP_544324.2 | PREDICTED: similar to potassium channel tetramerisation domain containing 16                                                                                     |
| XP_544327.2 | PREDICTED: similar to cutaneous T-cell lymphoma tumor antigen se70-2 isoform 1                                                                                   |
| XP_544328.1 | PREDICTED: similar to POU domain, class 4, transcription factor 3 (Brain-specific homeobox/POU domain protein 3C) (Brn-3C)                                       |
| XP_544332.2 | PREDICTED: similar to Dihydropyrimidinase related protein-3 (DRP-3) (Unc-33-like phosphoprotein) (ULIP protein) (Collapsin response mediator protein 4) (CRMP-4) |
| XP_544336.2 | PREDICTED: similar to uracil-DNA glycosylase 2 isoform a                                                                                                         |
| XP_544339.2 | PREDICTED: similar to DEAD (Asp-Glu-Ala-Asp) box polypeptide 4                                                                                                   |
| XP_544346.1 | PREDICTED: similar to Actin, cytoplasmic 1 (Beta-actin 1)                                                                                                        |
| XP_544359.2 | PREDICTED: similar to ring finger protein 180 isoform 1                                                                                                          |
| XP_544363.2 | PREDICTED: similar to phosphoinositide-3-kinase, regulatory subunit, polypeptide 1 isoform 2 isoform 1                                                           |
| XP_544378.2 | PREDICTED: similar to amino acid transporter isoform 1                                                                                                           |
| XP_544385.2 | PREDICTED: similar to kinesin family member C3                                                                                                                   |
| XP_544391.2 | PREDICTED: similar to chemokine (C-X3-C motif) ligand 1                                                                                                          |
| XP_544395.2 | PREDICTED: similar to autocrine motility factor receptor isoform a                                                                                               |
| XP_544399.2 | PREDICTED: similar to calpain small subunit 2                                                                                                                    |
| XP_544404.2 | PREDICTED: similar to retinitis pigmentosa GTPase regulator interacting protein 1                                                                                |
| XP_544410.2 | PREDICTED: similar to Sal-like protein 1 (Zinc finger protein SALL1) (Spalt-like transcription factor 1) (HSal1) isoform 1                                       |
| XP_544412.2 | PREDICTED: similar to NOD2 protein                                                                                                                               |
| XP_544414.2 | PREDICTED: similar to naked cuticle homolog 1                                                                                                                    |
| XP_544415.2 | PREDICTED: similar to Adenylate cyclase, type VII (ATP pyrophosphate-lyase 7) (Adenylyl cyclase 7)                                                               |
| XP_544419.1 | PREDICTED: similar to seven in absentia homolog 1 isoform b isoform 1                                                                                            |
| XP_544421.2 | PREDICTED: similar to zinc finger protein 31                                                                                                                     |
| XP_544426.2 | PREDICTED: similar to tripartite motif-containing 62                                                                                                             |
| XP_544429.2 | PREDICTED: similar to syncoilin                                                                                                                                  |
| XP_544440.2 | PREDICTED: similar to Importin alpha-7 subunit (Karyopherin alpha-6) isoform 1                                                                                   |
| XP_544443.2 | PREDICTED: similar to Brain-specific angiogenesis inhibitor 2 precursor isoform 1                                                                                |
| XP_544444.2 | PREDICTED: similar to procollagen, type XVI, alpha 1                                                                                                             |
| XP_544450.2 | PREDICTED: similar to Lysosomal-associated multitransmembrane protein (Retinoic acid-inducible E3 protein) (HA1520)                                              |
| XP_544457.1 | PREDICTED: similar to Ras-related protein Rab-39A                                                                                                                |
| XP_544461.2 | PREDICTED: similar to Sestrin-2 (Hi95)                                                                                                                           |
| XP_544468.2 | PREDICTED: similar to AT hook, DNA binding motif, containing 1                                                                                                   |
| XP_544469.1 | PREDICTED: similar to WAS protein family, member 2                                                                                                               |
| XP_544473.2 | PREDICTED: similar to WD and tetratricopeptide repeats protein 1                                                                                                 |
| XP_544481.2 | PREDICTED: similar to absent in melanoma 1-like                                                                                                                  |

|             |                                                                                                                                                                 |
|-------------|-----------------------------------------------------------------------------------------------------------------------------------------------------------------|
| XP_544498.2 | PREDICTED: similar to myomesin family, member 3                                                                                                                 |
| XP_544499.1 | PREDICTED: similar to UDP-galactose-4-epimerase                                                                                                                 |
| XP_544500.2 | PREDICTED: similar to Acyl-protein thioesterase 2 (Lysophospholipase II) (LPL-I)                                                                                |
| XP_544501.2 | PREDICTED: similar to elongation factor 1-alpha                                                                                                                 |
| XP_544528.2 | PREDICTED: similar to 5-hydroxytryptamine 6 receptor (5-HT-6) (Serotonin receptor 6)                                                                            |
| XP_544531.2 | PREDICTED: similar to PQ loop repeat containing 2                                                                                                               |
| XP_544534.2 | PREDICTED: similar to kelch-like ECH-associated protein 1                                                                                                       |
| XP_544563.2 | PREDICTED: similar to Tumor necrosis factor receptor superfamily member 8 precursor (CD30L receptor) (Lymphocyte activation antigen CD30) (KI-1 antigen)        |
| XP_544568.2 | PREDICTED: similar to Mitotic spindle assembly checkpoint protein MAD2B (MAD2-like 2)                                                                           |
| XP_544573.2 | PREDICTED: similar to Probable transcription factor CST (Castor-related protein)                                                                                |
| XP_544594.2 | PREDICTED: similar to nuclear protein in testis                                                                                                                 |
| XP_544602.2 | PREDICTED: similar to connexin-36                                                                                                                               |
| XP_544610.2 | PREDICTED: similar to thrombospondin 1 precursor                                                                                                                |
| XP_544614.2 | PREDICTED: similar to Serine/threonine-protein kinase PAK 6 (p21-activated kinase 6) (PAK-6) (PAK-5)                                                            |
| XP_544615.2 | PREDICTED: similar to 1-phosphatidylinositol-4,5-bisphosphate phosphodiesterase beta 2 (Phosphoinositide phospholipase C) (PLC-beta-2) (Phospholipase C-beta-2) |
| XP_544616.2 | PREDICTED: similar to F32B6.11                                                                                                                                  |
| XP_544618.2 | PREDICTED: similar to dispatched B                                                                                                                              |
| XP_544619.2 | PREDICTED: similar to bromo adjacent homology domain containing 1                                                                                               |
| XP_544622.2 | PREDICTED: similar to GTP cyclohydrolase I feedback regulator                                                                                                   |
| XP_544623.1 | PREDICTED: similar to Zinc finger FYVE domain containing protein 19 (MLL partner containing FYVE domain)                                                        |
| XP_544625.2 | PREDICTED: similar to hepatocyte growth factor activator inhibitor 1 isoform 2 precursor                                                                        |
| XP_544630.2 | PREDICTED: similar to Paf1/RNA polymerase II complex component isoform 1                                                                                        |
| XP_544635.2 | PREDICTED: similar to mitogen-activated protein kinase binding protein 1-like                                                                                   |
| XP_544637.2 | PREDICTED: similar to Spectrin beta chain, brain 4 (Spectrin, non-erythroid beta chain 4) (Beta-V spectrin) (BSPECV)                                            |
| XP_544641.2 | PREDICTED: similar to Neutral alpha-glucosidase C                                                                                                               |
| XP_544643.2 | PREDICTED: similar to StAR-related lipid transfer protein 9 (StARD9) (START domain-containing protein 9)                                                        |
| XP_544644.2 | PREDICTED: similar to tau tubulin kinase 1 isoform 1                                                                                                            |
| XP_544645.2 | PREDICTED: similar to ubiquitin protein ligase E3 component n-recognin 1                                                                                        |
| XP_544648.1 | PREDICTED: similar to leucine carboxyl methyltransferase 2                                                                                                      |
| XP_544657.2 | PREDICTED: similar to CG13531-PB                                                                                                                                |
| XP_544663.2 | PREDICTED: similar to Glycine amidinotransferase, mitochondrial precursor (L-arginine:glycine amidinotransferase) (Transamidinase) (AT)                         |
| XP_544671.2 | PREDICTED: similar to rai-like protein                                                                                                                          |
| XP_544673.2 | PREDICTED: similar to N-acetylgalactosamine kinase (GalNAc kinase) (Galactokinase 2) isoform 1                                                                  |
| XP_544687.2 | PREDICTED: similar to TGF-beta resistance-associated protein                                                                                                    |
| XP_544689.2 | PREDICTED: similar to unc-13 homolog C isoform 3                                                                                                                |
| XP_544699.2 | PREDICTED: similar to cingulin-like 1                                                                                                                           |

|             |                                                                                                                                                                   |
|-------------|-------------------------------------------------------------------------------------------------------------------------------------------------------------------|
| XP_544705.2 | PREDICTED: similar to BCL2/adenovirus E1B 19kD interacting protein 2                                                                                              |
| XP_544713.2 | PREDICTED: similar to lactamase, beta                                                                                                                             |
| XP_544717.2 | PREDICTED: similar to guanine nucleotide exchange factor p532 isoform 1                                                                                           |
| XP_544723.2 | PREDICTED: similar to ankyrin 3, epithelial isoform b                                                                                                             |
| XP_544729.2 | PREDICTED: similar to DDM36                                                                                                                                       |
| XP_544736.2 | PREDICTED: similar to likely ortholog of mouse klotho lactase-phlorizin hydrolase related protein                                                                 |
| XP_544737.2 | PREDICTED: similar to Mothers against decapentaplegic homolog 6 (SMAD 6) (Mothers against DPP homolog 6) (Smad6) (hSMAD6)                                         |
| XP_544740.2 | PREDICTED: hypothetical protein XP_544740                                                                                                                         |
| XP_544749.2 | PREDICTED: similar to Transducin-like enhancer protein 3 (ESG3)                                                                                                   |
| XP_544753.2 | PREDICTED: similar to CG6232-PA                                                                                                                                   |
| XP_544755.2 | PREDICTED: similar to myosin IXA                                                                                                                                  |
| XP_544760.2 | PREDICTED: similar to Neogenin precursor                                                                                                                          |
| XP_544771.2 | PREDICTED: similar to AT rich interactive domain 3B (BRIGHT- like) protein isoform 2                                                                              |
| XP_544781.1 | PREDICTED: similar to U3 small nucleolar ribonucleoprotein protein IMP3 (U3 snoRNP protein IMP3) (BRMS2)                                                          |
| XP_544783.2 | PREDICTED: similar to melanoma-associated chondroitin sulfate proteoglycan 4                                                                                      |
| XP_544787.2 | PREDICTED: hypothetical protein XP_544787                                                                                                                         |
| XP_544791.2 | PREDICTED: similar to Insulin gene enhancer protein ISL-2 (Islet-2)                                                                                               |
| XP_544794.2 | PREDICTED: hypothetical protein XP_544794                                                                                                                         |
| XP_544799.2 | PREDICTED: similar to chromatin modifying protein 2B                                                                                                              |
| XP_544814.2 | PREDICTED: similar to roundabout 1 isoform a                                                                                                                      |
| XP_544824.2 | PREDICTED: similar to Enteropeptidase precursor (Enterokinase)                                                                                                    |
| XP_544833.2 | PREDICTED: similar to mitochondrial ribosomal protein L39 isoform a                                                                                               |
| XP_544835.2 | PREDICTED: similar to H3 histone, family 3B                                                                                                                       |
| XP_544842.1 | PREDICTED: similar to BTB and CNC homology 1 isoform a                                                                                                            |
| XP_544855.2 | PREDICTED: similar to T-lymphoma invasion and metastasis inducing protein 1 (TIAM1 protein) isoform 1                                                             |
| XP_544857.2 | PREDICTED: similar to hormonally upregulated Neu-associated kinase                                                                                                |
| XP_544859.2 | PREDICTED: similar to Nucleolar preribosomal-associated protein 1                                                                                                 |
| XP_544861.2 | PREDICTED: similar to Interferon-alpha/beta receptor beta chain precursor (IFN-alpha-REC) (Type I interferon receptor) (IFN-R) (Interferon alpha/beta receptor-2) |
| XP_544871.2 | PREDICTED: similar to runt-related transcription factor 1 isoform b isoform 1                                                                                     |
| XP_544873.2 | PREDICTED: similar to carbonyl reductase 3                                                                                                                        |
| XP_544874.2 | PREDICTED: similar to pad-1-like                                                                                                                                  |
| XP_544889.2 | PREDICTED: similar to bromodomain and WD repeat domain containing 1 isoform A                                                                                     |
| XP_544899.2 | PREDICTED: hypothetical protein XP_544899                                                                                                                         |
| XP_544900.1 | PREDICTED: similar to zinc finger protein 295 isoform 1                                                                                                           |
| XP_544901.2 | PREDICTED: similar to uromodulin-like 1                                                                                                                           |
| XP_544904.2 | PREDICTED: similar to ubiquitin associated and SH3 domain containing, A short form                                                                                |

|             |                                                                                                                                                                                                  |
|-------------|--------------------------------------------------------------------------------------------------------------------------------------------------------------------------------------------------|
| XP_544905.2 | PREDICTED: similar to solute carrier family 37 member 1                                                                                                                                          |
| XP_544921.2 | PREDICTED: similar to Autoimmune regulator (Autoimmune polyendocrinopathy candidiasis ectodermal dystrophy protein) (APECED protein)                                                             |
| XP_544922.2 | PREDICTED: similar to 6-phosphofructokinase, liver type (Phosphofructokinase 1) (Phosphohexokinase) (Phosphofructo-1-kinase isozyme B) (PFK-B)                                                   |
| XP_544943.2 | PREDICTED: similar to anthrax toxin receptor 2                                                                                                                                                   |
| XP_544944.2 | PREDICTED: similar to L-lactate dehydrogenase B chain (LDH-B) (LDH heart subunit) (LDH-H)                                                                                                        |
| XP_544956.2 | PREDICTED: similar to THAP domain containing 9                                                                                                                                                   |
| XP_544960.2 | PREDICTED: similar to NK6 transcription factor related, locus 1 isoform 1                                                                                                                        |
| XP_544963.2 | PREDICTED: similar to WD repeat and FYVE domain containing 3 isoform 1 isoform 1                                                                                                                 |
| XP_544970.2 | PREDICTED: similar to dehydrogenase/reductase (SDR family) member 8                                                                                                                              |
| XP_544971.2 | PREDICTED: similar to dentin sialophosphoprotein preproprotein                                                                                                                                   |
| XP_544980.2 | PREDICTED: similar to multimerin 1 isoform 2                                                                                                                                                     |
| XP_544984.2 | PREDICTED: similar to CG6597-PA, isoform A                                                                                                                                                       |
| XP_544989.2 | PREDICTED: hypothetical protein XP_544989                                                                                                                                                        |
| XP_544990.2 | PREDICTED: similar to Rap1 GTPase-GDP dissociation stimulator 1 (SMG P21 stimulatory GDP/GTP exchange protein) (SMG GDS protein) (Exchange factor smgGDS) isoform 1                              |
| XP_544992.2 | PREDICTED: similar to Eukaryotic translation initiation factor 4E (eIF4E) (eIF-4E) (mRNA cap-binding protein) (eIF-4F 25 kDa subunit) isoform 1                                                  |
| XP_544996.2 | PREDICTED: hypothetical protein XP_544996                                                                                                                                                        |
| XP_545005.2 | PREDICTED: similar to Beta-mannosidase precursor (Mannanase) (Mannase)                                                                                                                           |
| XP_545015.2 | PREDICTED: similar to CG4041-PA isoform 1                                                                                                                                                        |
| XP_545030.2 | PREDICTED: similar to prematurely terminated mRNA decay factor-like                                                                                                                              |
| XP_545033.2 | PREDICTED: similar to 2-hydroxyacylsphingosine 1-beta-galactosyltransferase precursor (UDP-galactose-ceramide galactosyltransferase) (Ceramide UDP-galactosyltransferase) (Cerebroside synthase) |
| XP_545043.2 | PREDICTED: similar to CG7818-PA                                                                                                                                                                  |
| XP_545064.2 | PREDICTED: similar to olfactory receptor 198                                                                                                                                                     |
| XP_545077.2 | PREDICTED: similar to Sentrin-specific protease 7 (Sentrin/SUMO-specific protease SENP7) (SUMO-1 specific protease 2)                                                                            |
| XP_545095.2 | PREDICTED: similar to Transmembrane protease, serine 7 precursor                                                                                                                                 |
| XP_545101.2 | PREDICTED: similar to brother of CDO                                                                                                                                                             |
| XP_545102.2 | PREDICTED: similar to T19D12.1                                                                                                                                                                   |
| XP_545106.2 | PREDICTED: similar to D(3) dopamine receptor                                                                                                                                                     |
| XP_545112.2 | PREDICTED: hypothetical protein XP_545112                                                                                                                                                        |
| XP_545115.2 | PREDICTED: similar to x 010 protein                                                                                                                                                              |
| XP_545122.2 | PREDICTED: similar to G protein-coupled receptor 156                                                                                                                                             |
| XP_545130.2 | PREDICTED: similar to Cystatin A (Stefin A) (Cystatin AS)                                                                                                                                        |
| XP_545138.2 | PREDICTED: similar to HEG homolog 1                                                                                                                                                              |
| XP_545155.2 | PREDICTED: similar to leucine rich repeat containing 33                                                                                                                                          |
| XP_545158.2 | PREDICTED: similar to Melanotransferrin precursor (Melanoma-associated antigen p97) (CD228 antigen)                                                                                              |
| XP_545164.2 | PREDICTED: similar to leucine rich repeat containing 15                                                                                                                                          |



|             |                                                                                                                                                                                                              |
|-------------|--------------------------------------------------------------------------------------------------------------------------------------------------------------------------------------------------------------|
| XP_545165.2 | PREDICTED: similar to Carboxypeptidase N subunit 2 precursor (Carboxypeptidase N polypeptide 2) (Carboxypeptidase N 83 kDa chain) (Carboxypeptidase N regulatory subunit) (Carboxypeptidase N large subunit) |
| XP_545166.2 | PREDICTED: similar to XPA-binding protein 2 (HCNP protein)                                                                                                                                                   |
| XP_545171.2 | PREDICTED: similar to catenin (cadherin-associated protein), delta 2 (neural plakophilin-related arm-repeat protein)                                                                                         |
| XP_545177.2 | PREDICTED: similar to eukaryotic translation elongation factor 1 alpha 1 isoform 1                                                                                                                           |
| XP_545182.2 | PREDICTED: similar to mucin 17                                                                                                                                                                               |
| XP_545184.2 | PREDICTED: similar to ADAMTS-16 precursor (A disintegrin and metalloproteinase with thrombospondin motifs 16) (ADAM-TS 16) (ADAM-TS16)                                                                       |
| XP_545189.2 | PREDICTED: similar to CG32699-PA                                                                                                                                                                             |
| XP_545193.2 | PREDICTED: similar to Solute carrier family 12, member 7 (Electroneutral potassium-chloride cotransporter 4) (K-Cl cotransporter 4)                                                                          |
| XP_545194.2 | PREDICTED: similar to naked cuticle homolog 2                                                                                                                                                                |
| XP_545208.2 | PREDICTED: similar to phosphoinositide-3-kinase, catalytic, alpha polypeptide                                                                                                                                |
| XP_545211.1 | PREDICTED: similar to guanine nucleotide-binding protein, beta-4 subunit                                                                                                                                     |
| XP_545212.2 | PREDICTED: similar to PEX5-related protein (Peroxis 5-related protein) (Pex5Rp) (PEX2-related protein) isoform 1                                                                                             |
| XP_545223.2 | PREDICTED: similar to YEATS domain containing 2                                                                                                                                                              |
| XP_545224.2 | PREDICTED: similar to presenilin associated, rhomboid-like isoform 2                                                                                                                                         |
| XP_545225.2 | PREDICTED: similar to 5-hydroxytryptamine receptor 3 subunit C                                                                                                                                               |
| XP_545232.2 | PREDICTED: similar to ephrin receptor EphB3 precursor                                                                                                                                                        |
| XP_545236.2 | PREDICTED: similar to lipase, member H precursor                                                                                                                                                             |
| XP_545239.2 | PREDICTED: similar to Diacylglycerol kinase, gamma (Diglyceride kinase) (DGK-gamma) (DAG kinase gamma)                                                                                                       |
| XP_545242.2 | PREDICTED: similar to eukaryotic translation initiation factor 4A2 isoform 2                                                                                                                                 |
| XP_545245.2 | PREDICTED: similar to mannan-binding lectin serine protease 1 isoform 2 precursor isoform 1                                                                                                                  |
| XP_545250.2 | PREDICTED: similar to Interleukin-1 receptor accessory protein precursor (IL-1 receptor accessory protein) (IL-1RAcP)                                                                                        |
| XP_545252.2 | PREDICTED: similar to ATPase type 13A5                                                                                                                                                                       |
| XP_545265.2 | PREDICTED: similar to Sucrase-isomaltase, intestinal                                                                                                                                                         |
| XP_545268.2 | PREDICTED: similar to WD repeat domain 49                                                                                                                                                                    |
| XP_545271.2 | PREDICTED: similar to EGF-like-domain, multiple 3                                                                                                                                                            |
| XP_545272.2 | PREDICTED: similar to ecotropic viral integration site 1                                                                                                                                                     |
| XP_545284.2 | PREDICTED: similar to claudin 11                                                                                                                                                                             |
| XP_545290.2 | PREDICTED: similar to TRAF2 and NCK interacting kinase isoform 1                                                                                                                                             |
| XP_545291.2 | PREDICTED: similar to Phospholipase D1 (PLD 1) (Choline phosphatase 1) (Phosphatidylcholine-hydrolyzing phospholipase D1) (hPLD1) isoform 1                                                                  |
| XP_545293.2 | PREDICTED: similar to fibronectin type III domain containing 3B isoform 1                                                                                                                                    |
| XP_545299.2 | PREDICTED: similar to nuclear receptor co-repressor/HDAC3 complex subunit isoform 1                                                                                                                          |
| XP_545302.2 | PREDICTED: similar to calcium-activated potassium channel beta 2 subunit                                                                                                                                     |
| XP_545317.2 | PREDICTED: similar to receptor (TNFRSF)-interacting serine-threonine kinase 1                                                                                                                                |
| XP_545328.2 | PREDICTED: similar to ras responsive element binding protein 1 isoform 1                                                                                                                                     |
| XP_545329.2 | PREDICTED: similar to desmoplakin isoform II                                                                                                                                                                 |

|             |                                                                                                                                                                                                                                                   |
|-------------|---------------------------------------------------------------------------------------------------------------------------------------------------------------------------------------------------------------------------------------------------|
| XP_545339.2 | PREDICTED: similar to Chorion-specific transcription factor GCMb (Glial cells missing homolog 2) (GCM motif protein 2) (hGCMb)                                                                                                                    |
| XP_545342.2 | PREDICTED: similar to neural precursor cell expressed, developmentally down-regulated 9 isoform 1                                                                                                                                                 |
| XP_545343.2 | PREDICTED: similar to Zinc finger protein 40 (Human immunodeficiency virus type I enhancer-binding protein 1) (HIV-EP1) (Major histocompatibility complex binding protein 1) (MBP-1) (Positive regulatory domain II binding factor 1) (PRDII-BF1) |
| XP_545352.2 | PREDICTED: similar to Ubiquitin ligase MYLIP (Myosin regulatory light chain interacting protein) (MIR)                                                                                                                                            |
| XP_545369.2 | PREDICTED: similar to C27H2.3                                                                                                                                                                                                                     |
| XP_545370.2 | PREDICTED: similar to cytidine monophospho-N-acetylneuraminic acid hydroxylase                                                                                                                                                                    |
| XP_545371.2 | PREDICTED: similar to leucine rich repeat containing 16                                                                                                                                                                                           |
| XP_545386.2 | PREDICTED: similar to Histone H1.2 (H1d)                                                                                                                                                                                                          |
| XP_545397.2 | PREDICTED: similar to histone 1, H2ai (predicted)                                                                                                                                                                                                 |
| XP_545452.2 | PREDICTED: similar to ATP synthase, H <sup>+</sup> transporting, mitochondrial F0 complex, subunit c, isoform 1                                                                                                                                   |
| XP_545456.2 | PREDICTED: similar to zinc finger protein 505 isoform a                                                                                                                                                                                           |
| XP_545462.2 | PREDICTED: similar to Gamma-aminobutyric acid type B receptor, subunit 1 precursor (GABA-B receptor 1) (GABA-B-R1) (Gb1)                                                                                                                          |
| XP_545465.2 | PREDICTED: similar to zinc ribbon domain containing, 1                                                                                                                                                                                            |
| XP_545469.2 | PREDICTED: similar to Tripartite motif protein 26 (Zinc finger protein 173) (Acid finger protein) (AFP) (RING finger protein 95)                                                                                                                  |
| XP_545481.2 | PREDICTED: similar to UDP-N-acetyl-alpha-D-galactosamine:polypeptide N-acetylgalactosaminyltransferase 5 (GalNAc-T5)                                                                                                                              |
| XP_545488.2 | PREDICTED: similar to Lymphocyte antigen 75 precursor (DEC-205) (CD205 antigen) (gp200-MR6)                                                                                                                                                       |
| XP_545490.2 | PREDICTED: similar to Integrin beta-6 precursor isoform 1                                                                                                                                                                                         |
| XP_545503.2 | PREDICTED: similar to Sodium channel protein type IX alpha subunit (Voltage-gated sodium channel alpha subunit Nav1.7) (Neuroendocrine sodium channel) (hNE-Na) (Peripheral sodium channel 1) isoform 1                                           |
| XP_545509.2 | PREDICTED: similar to longevity assurance homolog 6                                                                                                                                                                                               |
| XP_545531.2 | PREDICTED: similar to Wiskott-Aldrich syndrome protein interacting protein                                                                                                                                                                        |
| XP_545535.1 | PREDICTED: similar to homeo box D12                                                                                                                                                                                                               |
| XP_545537.2 | PREDICTED: similar to homeo box D10                                                                                                                                                                                                               |
| XP_545543.1 | PREDICTED: similar to Alkyldihydroxyacetonephosphate synthase, peroxisomal precursor (Alkyl-DHAP synthase) (Alkylglycerone-phosphate synthase)                                                                                                    |
| XP_545544.2 | PREDICTED: similar to phosphodiesterase 11A                                                                                                                                                                                                       |
| XP_545551.2 | PREDICTED: similar to Integrin alpha-4 precursor (Integrin alpha-IV) (VLA-4) (CD49d)                                                                                                                                                              |
| XP_545566.2 | PREDICTED: similar to armadillo repeat containing 4                                                                                                                                                                                               |
| XP_545570.2 | PREDICTED: similar to Glutaminase, kidney isoform, mitochondrial precursor (GLS) (L-glutamine amidohydrolase) (K-glutaminase) isoform 1                                                                                                           |
| XP_545572.2 | PREDICTED: similar to serum deprivation response protein                                                                                                                                                                                          |
| XP_545574.2 | PREDICTED: similar to axonemal dynein heavy chain 7                                                                                                                                                                                               |
| XP_545581.2 | PREDICTED: similar to Glucose-6-phosphate isomerase (GPI) (Phosphoglucose isomerase) (PGI) (Phosphohexose isomerase) (PHI) (Neuroleukin) (NLK) (Sperm antigen-36) (SA-36)                                                                         |
| XP_545583.2 | PREDICTED: similar to CG31122-PA                                                                                                                                                                                                                  |
| XP_545585.2 | PREDICTED: similar to potassium channel tetramerisation domain containing 18                                                                                                                                                                      |
| XP_545595.2 | PREDICTED: similar to amyotrophic lateral sclerosis 2 (juvenile) chromosome region, candidate 12                                                                                                                                                  |
| XP_545596.2 | PREDICTED: similar to Amyotrophic lateral sclerosis 2 chromosomal region candidate gene protein 3 isoform 1                                                                                                                                       |

|             |                                                                                                                                                                                   |
|-------------|-----------------------------------------------------------------------------------------------------------------------------------------------------------------------------------|
| XP_545600.2 | PREDICTED: similar to Ica69-related protein isoform 1                                                                                                                             |
| XP_545603.2 | PREDICTED: similar to neurobeachin-like 1                                                                                                                                         |
| XP_545611.2 | PREDICTED: hypothetical protein XP_545611                                                                                                                                         |
| XP_545625.2 | PREDICTED: similar to microtubule-associated protein 2 isoform 3 isoform 1                                                                                                        |
| XP_545626.2 | PREDICTED: similar to CG18437-PA                                                                                                                                                  |
| XP_545629.2 | PREDICTED: similar to Receptor tyrosine-protein kinase erbB-4 precursor (p180erbB4) (Tyrosine kinase-type cell surface receptor HER4)                                             |
| XP_545631.2 | PREDICTED: similar to Zinc finger protein Helios isoform 1                                                                                                                        |
| XP_545639.2 | PREDICTED: similar to Tensin                                                                                                                                                      |
| XP_545643.2 | PREDICTED: similar to ubiquitin specific protease 37 isoform 1                                                                                                                    |
| XP_545644.2 | PREDICTED: similar to Zinc finger protein 142 (HA4654)                                                                                                                            |
| XP_545652.2 | PREDICTED: hypothetical protein XP_545652                                                                                                                                         |
| XP_545658.2 | PREDICTED: similar to chondroitin polymerizing factor                                                                                                                             |
| XP_545659.2 | PREDICTED: similar to obscurin, cytoskeletal calmodulin and titin-interacting RhoGEF                                                                                              |
| XP_545661.2 | PREDICTED: similar to serine/threonine kinase 11 interacting protein                                                                                                              |
| XP_545670.2 | PREDICTED: similar to WD repeat and FYVE domain containing 1                                                                                                                      |
| XP_545672.2 | PREDICTED: hypothetical protein XP_545672                                                                                                                                         |
| XP_545680.2 | PREDICTED: similar to protein phosphatase 1, regulatory subunit 15B                                                                                                               |
| XP_545686.2 | PREDICTED: similar to transmembrane and coiled-coil domains 2                                                                                                                     |
| XP_545695.2 | PREDICTED: similar to Vasopressin V1b receptor (V1bR) (AVPR V1b) (Vasopressin V3 receptor) (AVPR V3) (Antidiuretic hormone receptor 1b)                                           |
| XP_545702.2 | PREDICTED: similar to Regulator of G-protein signaling 1 (RGS1) (Early response protein 1R20) (B-cell activation protein BL34) isoform 1                                          |
| XP_545710.2 | PREDICTED: similar to usherin isoform B                                                                                                                                           |
| XP_545718.2 | PREDICTED: similar to MOCO sulphurase C-terminal domain containing 1                                                                                                              |
| XP_545720.2 | PREDICTED: similar to ubiquitin specific protease 6                                                                                                                               |
| XP_545721.2 | PREDICTED: similar to dispatched A                                                                                                                                                |
| XP_545733.2 | PREDICTED: similar to Spectrin alpha chain, erythrocyte (Erythroid alpha-spectrin)                                                                                                |
| XP_545738.2 | PREDICTED: similar to olfactory receptor 433                                                                                                                                      |
| XP_545739.2 | PREDICTED: similar to myeloid cell nuclear differentiation antigen                                                                                                                |
| XP_545749.2 | PREDICTED: similar to coxsackie virus and adenovirus receptor                                                                                                                     |
| XP_545751.2 | PREDICTED: similar to immunoglobulin superfamily, member 9                                                                                                                        |
| XP_545752.2 | PREDICTED: similar to ATP-sensitive inward rectifier potassium channel 10 (Potassium channel, inwardly rectifying, subfamily J, member 10) (Inward rectifier K(+) channel Kir4.1) |
| XP_545753.2 | PREDICTED: similar to Sodium/potassium-transporting ATPase alpha-2 chain precursor (Sodium pump 2) (Na+/K+ ATPase 2) isoform 1                                                    |
| XP_545754.2 | PREDICTED: similar to Sodium/potassium-transporting ATPase alpha-4 chain (Sodium pump 4) (Na+/K+ ATPase 4)                                                                        |
| XP_545758.2 | PREDICTED: similar to CD84 antigen (leukocyte antigen)                                                                                                                            |
| XP_545764.2 | PREDICTED: similar to Rho GTPase activating protein 30 isoform 1                                                                                                                  |
| XP_545766.2 | PREDICTED: similar to death effector domain-containing protein isoform 1                                                                                                          |

|             |                                                                                                                                       |
|-------------|---------------------------------------------------------------------------------------------------------------------------------------|
| XP_545775.2 | PREDICTED: similar to Fc receptor-like and mucin-like 1                                                                               |
| XP_545777.2 | PREDICTED: similar to activating transcription factor 6                                                                               |
| XP_545786.2 | PREDICTED: similar to Pre-B-cell leukemia transcription factor-1 (Homeobox protein PBX1) isoform 3                                    |
| XP_545788.2 | PREDICTED: similar to leucine rich repeat containing 52                                                                               |
| XP_545793.2 | PREDICTED: similar to olfactory receptor Olr880                                                                                       |
| XP_545816.2 | PREDICTED: similar to transient receptor potential cation channel, subfamily M, member 1                                              |
| XP_545823.2 | PREDICTED: similar to leucine-rich repeat kinase 1                                                                                    |
| XP_545837.2 | PREDICTED: similar to Repulsive guidance molecule A precursor (RGM domain family member A)                                            |
| XP_545842.1 | PREDICTED: similar to NADH dehydrogenase (ubiquinone) 1 alpha subcomplex, 2, 8kDa                                                     |
| XP_545843.1 | PREDICTED: similar to BTB/POZ KELCH domain protein                                                                                    |
| XP_545848.2 | PREDICTED: similar to Lactadherin precursor (Milk fat globule-EGF factor 8) (MFG-E8) (O-acetyl GD3 ganglioside synthase) (AGS) (MFGM) |
| XP_545849.2 | PREDICTED: similar to CG13745-PA                                                                                                      |
| XP_545852.2 | PREDICTED: similar to kinesin family member 7                                                                                         |
| XP_545859.2 | PREDICTED: similar to Semaphorin 4B precursor                                                                                         |
| XP_545861.2 | PREDICTED: similar to smooth muscle cell associated protein-1 isoform 1                                                               |
| XP_545865.2 | PREDICTED: similar to transducer of regulated CREB protein 3                                                                          |
| XP_545867.2 | PREDICTED: similar to zinc finger protein 29 isoform 1                                                                                |
| XP_545869.2 | PREDICTED: similar to Zinc finger protein 592                                                                                         |
| XP_545874.2 | PREDICTED: similar to Zinc finger protein basophilin 1                                                                                |
| XP_545876.2 | PREDICTED: similar to CG30069-PA                                                                                                      |
| XP_545877.2 | PREDICTED: similar to ring finger and KH domain containing 3                                                                          |
| XP_545884.2 | PREDICTED: similar to KIAA1199                                                                                                        |
| XP_545892.2 | PREDICTED: similar to Ras protein-specific guanine nucleotide-releasing factor 1 isoform 1                                            |
| XP_545897.2 | PREDICTED: similar to Epididymis-specific alpha-mannosidase precursor (Mannosidase alpha class 2B member 2), partial                  |
| XP_545911.2 | PREDICTED: similar to Alpha-2C adrenergic receptor (Alpha-2C adrenoceptor) (Alpha-2C adrenoreceptor) (Subtype C4)                     |
| XP_545913.2 | PREDICTED: similar to tetracycline transporter-like protein                                                                           |
| XP_545922.2 | PREDICTED: similar to polymerase (DNA directed) nu                                                                                    |
| XP_545925.2 | PREDICTED: similar to Leucine zipper-EF-hand containing transmembrane protein 1, mitochondrial precursor                              |
| XP_545926.2 | PREDICTED: similar to Fibroblast growth factor receptor 3 precursor (FGFR-3)                                                          |
| XP_545930.2 | PREDICTED: similar to ZK742.2                                                                                                         |
| XP_545933.2 | PREDICTED: similar to CG7218-PA                                                                                                       |
| XP_545940.2 | PREDICTED: similar to bagpipe homeobox 1                                                                                              |
| XP_545942.2 | PREDICTED: similar to D(1B) dopamine receptor (D(5) dopamine receptor) (D1beta dopamine receptor)                                     |
| XP_545955.2 | PREDICTED: similar to T05C3.2                                                                                                         |
| XP_545957.2 | PREDICTED: hypothetical protein XP_545957                                                                                             |
| XP_545958.2 | PREDICTED: similar to centaurin delta 1 isoform a                                                                                     |

|             |                                                                                                                                                                     |
|-------------|---------------------------------------------------------------------------------------------------------------------------------------------------------------------|
| XP_545961.2 | PREDICTED: similar to protocadherin 7 isoform a precursor                                                                                                           |
| XP_545968.2 | PREDICTED: similar to solute carrier family 34 (sodium phosphate), member 2                                                                                         |
| XP_545969.2 | PREDICTED: similar to tensin like C1 domain containing phosphatase isoform 1                                                                                        |
| XP_545972.2 | PREDICTED: similar to CG14868-PA                                                                                                                                    |
| XP_545977.2 | PREDICTED: similar to Probable G-protein coupled receptor 125 precursor                                                                                             |
| XP_545983.2 | PREDICTED: alpha-L-iduronidase                                                                                                                                      |
| XP_545984.2 | PREDICTED: similar to solute carrier family 26, member 1 isoform a                                                                                                  |
| XP_545992.2 | PREDICTED: similar to WD repeat domain 36                                                                                                                           |
| XP_545998.2 | PREDICTED: similar to nudix -type motif 12                                                                                                                          |
| XP_545999.2 | PREDICTED: similar to CG31772-PA                                                                                                                                    |
| XP_546000.2 | PREDICTED: similar to CG14616-PD, isoform D                                                                                                                         |
| XP_546001.2 | PREDICTED: hypothetical protein XP_546001                                                                                                                           |
| XP_546008.2 | PREDICTED: similar to chromodomain helicase DNA binding protein 1 isoform 1                                                                                         |
| XP_546014.2 | PREDICTED: similar to leukocyte-derived arginine aminopeptidase                                                                                                     |
| XP_546039.2 | PREDICTED: similar to chondroitin sulfate proteoglycan 2 (versican)                                                                                                 |
| XP_546047.2 | PREDICTED: similar to Thrombospondin-4 precursor                                                                                                                    |
| XP_546052.2 | PREDICTED: similar to Dimethylglycine dehydrogenase, mitochondrial precursor (ME2GLYDH)                                                                             |
| XP_546055.2 | PREDICTED: similar to Homeobox protein orthopedia                                                                                                                   |
| XP_546074.2 | PREDICTED: similar to endoplasmic reticulum oxidoreductin 1-Lbeta                                                                                                   |
| XP_546076.2 | PREDICTED: similar to Nidogen precursor (Entactin) isoform 1                                                                                                        |
| XP_546085.2 | PREDICTED: similar to pecanex-like 2 isoform 2                                                                                                                      |
| XP_546087.2 | PREDICTED: similar to signal-induced proliferation-associated 1 like 2 (predicted)                                                                                  |
| XP_546088.2 | PREDICTED: similar to Disrupted in schizophrenia 1 protein                                                                                                          |
| XP_546091.2 | PREDICTED: similar to exocyst complex 84-kDa subunit                                                                                                                |
| XP_546096.2 | PREDICTED: similar to Conserved oligomeric Golgi complex component 2 (Low density lipoprotein receptor defect C-complementing protein)                              |
| XP_546100.2 | PREDICTED: similar to TAF5-like RNA polymerase II p300/CBP-associated factor-associated factor 65 kDa subunit 5L (PCAF associated factor 65 beta) (PAF65-beta)      |
| XP_546107.2 | PREDICTED: similar to Transcription factor A, mitochondrial precursor (mtTFA) (Mitochondrial transcription factor 1) (MtTF1) (Transcription factor 6-like 2)        |
| XP_546111.2 | PREDICTED: similar to coiled-coil domain containing 6                                                                                                               |
| XP_546129.2 | PREDICTED: similar to Heterogeneous nuclear ribonucleoprotein A1 (Helix-destabilizing protein) (Single-strand binding protein) (hnRNP core protein A1) (HDP)        |
| XP_546133.2 | PREDICTED: similar to DNA2-like homolog (DNA replication helicase-like homolog)                                                                                     |
| XP_546137.2 | PREDICTED: similar to hexokinase domain containing 1                                                                                                                |
| XP_546140.1 | PREDICTED: similar to neurogenin 3                                                                                                                                  |
| XP_546145.2 | PREDICTED: similar to Eukaryotic translation initiation factor 4E binding protein 2 (4E-BP2) (eIF4E-binding protein 2)                                              |
| XP_546149.2 | PREDICTED: similar to a disintegrin-like and metalloprotease (repolysin type) with thrombospondin type 1 motif, 14 isoform 2 preproprotein                          |
| XP_546160.2 | PREDICTED: similar to CG18769-PB, isoform B                                                                                                                         |
| XP_546163.2 | PREDICTED: similar to Group XIIB secretory phospholipase A2-like protein precursor (Group XIII secretory phospholipase A2-like protein) (GXIII sPLA2-like) (GXIIIB) |

|             |                                                                                                                                                                                                  |
|-------------|--------------------------------------------------------------------------------------------------------------------------------------------------------------------------------------------------|
| XP_546166.2 | PREDICTED: similar to Synaptopodin 2-like protein                                                                                                                                                |
| XP_546167.2 | PREDICTED: similar to Heparin sulfate N-deacetylase/N-sulfotransferase (N-HSST) (N-heparin sulfate sulfotransferase) (Glucosaminyl N-deacetylase/N-sulfotransferase) isoform 1                   |
| XP_546175.2 | PREDICTED: similar to catechol-O-methyltransferase domain containing 1                                                                                                                           |
| XP_546176.2 | PREDICTED: similar to zinc finger protein 503                                                                                                                                                    |
| XP_546184.2 | PREDICTED: similar to pulmonary surfactant-associated protein D precursor isoform 1                                                                                                              |
| XP_546189.2 | PREDICTED: similar to leucine rich repeat containing 22                                                                                                                                          |
| XP_546198.2 | PREDICTED: similar to G protein-regulated inducer of neurite outgrowth 1                                                                                                                         |
| XP_546200.2 | PREDICTED: similar to zinc finger protein 488                                                                                                                                                    |
| XP_546203.2 | PREDICTED: similar to docking protein 3                                                                                                                                                          |
| XP_546208.1 | PREDICTED: similar to regulator of G-protein signalling 14 isoform 1                                                                                                                             |
| XP_546216.2 | PREDICTED: similar to G protein-regulated inducer of neurite outgrowth 1                                                                                                                         |
| XP_546221.2 | PREDICTED: similar to ADP-ribosylation factor-like 10                                                                                                                                            |
| XP_546222.2 | PREDICTED: hypothetical protein XP_546222                                                                                                                                                        |
| XP_546226.2 | PREDICTED: similar to Sideroflexin-1 (Tricarboxylate carrier protein) (TCC)                                                                                                                      |
| XP_546227.2 | PREDICTED: similar to D(1A) dopamine receptor                                                                                                                                                    |
| XP_546239.2 | PREDICTED: similar to Serine/threonine-protein kinase 10 (Lymphocyte-oriented kinase)                                                                                                            |
| XP_546243.2 | PREDICTED: similar to potassium channel interacting protein 1                                                                                                                                    |
| XP_546253.2 | PREDICTED: similar to odd Oz/ten-m homolog 2                                                                                                                                                     |
| XP_546261.2 | PREDICTED: similar to gamma-aminobutyric acid A receptor, alpha 1                                                                                                                                |
| XP_546266.2 | PREDICTED: similar to Potential phospholipid-transporting ATPase VB                                                                                                                              |
| XP_546274.2 | PREDICTED: similar to a disintegrin and metalloproteinase domain 19 isoform 2 preproprotein                                                                                                      |
| XP_546275.2 | PREDICTED: similar to non imprinted in Prader-Willi/Angelman syndrome 2 isoform a                                                                                                                |
|             | PREDICTED: similar to Heart- and neural crest derivatives-expressed protein 1 (Extraembryonic tissues, heart, autonomic nervous system and neural crest derivatives-expressed protein 1) (eHAND) |
| XP_546282.2 |                                                                                                                                                                                                  |
| XP_546283.2 | PREDICTED: similar to GalNAc transferase 10 isoform a                                                                                                                                            |
| XP_546291.2 | PREDICTED: similar to solute carrier family 36 member 1                                                                                                                                          |
| XP_546292.2 | PREDICTED: similar to solute carrier family 36 (proton/amino acid symporter), member 2                                                                                                           |
| XP_546294.2 | PREDICTED: hypothetical protein XP_546294                                                                                                                                                        |
| XP_546301.2 | PREDICTED: similar to zinc finger protein 300 isoform 1                                                                                                                                          |
| XP_546313.2 | PREDICTED: similar to GrpE protein homolog 2, mitochondrial precursor (Mt-GrpE#2)                                                                                                                |
| XP_546317.2 | PREDICTED: similar to F-box only protein 38 (Modulator of KLF7 activity homolog) (MoKA) isoform 1                                                                                                |
| XP_546320.2 | PREDICTED: similar to chondroitin sulfate proteoglycan 4                                                                                                                                         |
| XP_546326.2 | PREDICTED: similar to Integrin alpha-2 precursor (Platelet membrane glycoprotein Ia) (GPIa) (Collagen receptor) (VLA-2 alpha chain) (CD49b)                                                      |
| XP_546328.2 | PREDICTED: similar to integrin, alpha 1 precursor                                                                                                                                                |
| XP_546344.2 | PREDICTED: similar to delangin isoform A isoform 1                                                                                                                                               |

|             |                                                                                                                       |
|-------------|-----------------------------------------------------------------------------------------------------------------------|
| XP_546346.2 | PREDICTED: similar to S-phase kinase-associated protein 2 isoform 1                                                   |
| XP_546370.2 | PREDICTED: similar to tropomyosin isoform 6                                                                           |
| XP_546380.2 | PREDICTED: similar to F-box/LRR-repeat protein 7 (F-box and leucine-rich repeat protein 7) (F-box protein FBL6/FBL7)  |
| XP_546390.2 | PREDICTED: similar to immunoglobulin superfamily, member 9                                                            |
| XP_546398.2 | PREDICTED: similar to nuclear factor related to kappaB binding protein                                                |
| XP_546401.2 | PREDICTED: similar to Rho GTPase-activating protein                                                                   |
| XP_546424.2 | PREDICTED: similar to roundabout homolog 4, magic roundabout                                                          |
| XP_546425.2 | PREDICTED: similar to roundabout, axon guidance receptor, homolog 3                                                   |
| XP_546428.2 | PREDICTED: similar to V-set and immunoglobulin domain containing 2                                                    |
| XP_546432.2 | PREDICTED: similar to olfactory receptor Olr1196                                                                      |
| XP_546433.2 | PREDICTED: similar to olfactory receptor Olr1200                                                                      |
| XP_546465.2 | PREDICTED: similar to Olfactory receptor 6M1 (Olfactory receptor OR11-271)                                            |
| XP_546475.2 | PREDICTED: similar to Alpha-tectorin precursor                                                                        |
| XP_546480.2 | PREDICTED: similar to tripartite motif protein TRIM29 isoform beta                                                    |
| XP_546486.2 | PREDICTED: similar to melanoma cell adhesion molecule                                                                 |
| XP_546488.2 | PREDICTED: similar to NOD9 protein isoform 1                                                                          |
| XP_546492.2 | PREDICTED: similar to vacuolar protein sorting 11 (yeast homolog) isoform 1                                           |
| XP_546499.2 | PREDICTED: similar to pleckstrin homology-like domain, family B, member 1 isoform 1                                   |
| XP_546506.2 | PREDICTED: similar to Down syndrome cell adhesion molecule like 1                                                     |
| XP_546507.2 | PREDICTED: similar to golgi autoantigen, golgin subfamily a, 4                                                        |
| XP_546510.2 | PREDICTED: similar to Apolipoprotein A-IV precursor (ApoA-IV) (ApoA-IV)                                               |
| XP_546516.2 | PREDICTED: similar to promyelocytic leukemia zinc finger protein isoform 1                                            |
| XP_546524.2 | PREDICTED: similar to dihydrolipoamide S-acetyltransferase (E2 component of pyruvate dehydrogenase complex) isoform 1 |
| XP_546526.2 | PREDICTED: similar to Phenylalanyl-tRNA synthetase, mitochondrial precursor (Phenylalanine--tRNA ligase) (PheRS)      |
| XP_546529.2 | PREDICTED: similar to layilin                                                                                         |
| XP_546534.2 | PREDICTED: similar to zinc finger CCCH type containing 12A                                                            |
| XP_546538.1 | PREDICTED: similar to nuclear protein, ataxia-telangiectasia locus                                                    |
| XP_546539.2 | PREDICTED: similar to Acetyl-CoA acetyltransferase, mitochondrial precursor (Acetoacetyl-CoA thiolase) (T2)           |
| XP_546552.2 | PREDICTED: hypothetical protein XP_546552                                                                             |
| XP_546553.2 | PREDICTED: similar to transient receptor potential cation channel, subfamily C, member 6                              |
| XP_546554.2 | PREDICTED: similar to zinc finger, ZZ-type with EF hand domain 1 isoform 1                                            |
| XP_546563.2 | PREDICTED: similar to PITPNM family member 3                                                                          |
| XP_546568.2 | PREDICTED: similar to complement component 1, q subcomponent binding protein precursor                                |
| XP_546570.1 | PREDICTED: similar to zinc finger protein 239 (predicted)                                                             |
| XP_546571.2 | PREDICTED: similar to kinesin family member 1C                                                                        |
| XP_546572.2 | PREDICTED: similar to calmodulin binding transcription activator 2                                                    |

|             |                                                                                                                                                           |
|-------------|-----------------------------------------------------------------------------------------------------------------------------------------------------------|
| XP_546574.2 | PREDICTED: similar to ring finger protein 167                                                                                                             |
| XP_546577.2 | PREDICTED: similar to B-cell CLL/lymphoma 6, member B (zinc finger protein)                                                                               |
| XP_546580.2 | PREDICTED: similar to postsynaptic density protein 95                                                                                                     |
| XP_546581.2 | PREDICTED: similar to Acyl-CoA dehydrogenase, very-long-chain specific, mitochondrial precursor (VLCAD) isoform 1                                         |
| XP_546582.2 | PREDICTED: similar to dishevelled 2                                                                                                                       |
| XP_546587.2 | PREDICTED: similar to CG6451-PA isoform 1                                                                                                                 |
| XP_546598.2 | PREDICTED: similar to 1-beta dynein                                                                                                                       |
| XP_546599.2 | PREDICTED: similar to jumonji domain containing 3                                                                                                         |
| XP_546605.2 | PREDICTED: similar to arachidonate lipoxygenase 3                                                                                                         |
| XP_546616.2 | PREDICTED: similar to ubiquitin specific protease 43                                                                                                      |
| XP_546628.2 | PREDICTED: similar to myocardin                                                                                                                           |
| XP_546630.2 | PREDICTED: similar to elaC homolog 2                                                                                                                      |
| XP_546631.2 | PREDICTED: similar to heparan sulfate D-glucosaminyl 3-O-sulfotransferase 3A1                                                                             |
| XP_546638.2 | PREDICTED: similar to zinc finger protein 135 (clone pHZ-17)                                                                                              |
| XP_546644.2 | PREDICTED: similar to unc-51-like kinase 2                                                                                                                |
| XP_546648.2 | PREDICTED: hypothetical protein XP_546648                                                                                                                 |
| XP_546649.2 | PREDICTED: similar to zinc finger protein 179                                                                                                             |
| XP_546656.2 | PREDICTED: similar to topoisomerase (DNA) III alpha                                                                                                       |
| XP_546660.2 | PREDICTED: similar to retinoic acid induced 1                                                                                                             |
| XP_546674.2 | PREDICTED: similar to Adenylate kinase isoenzyme 4, mitochondrial (ATP-AMP transphosphorylase)                                                            |
| XP_546696.2 | PREDICTED: similar to thioesterase, adipose associated isoform BFIT2                                                                                      |
| XP_546700.2 | PREDICTED: similar to leucine rich repeat containing 42 isoform 1                                                                                         |
| XP_546702.2 | PREDICTED: similar to Zinc finger protein GLIS1 (GLI-similar 1) (Gli homologous protein 1) (GliH1)                                                        |
| XP_546704.2 | PREDICTED: similar to low density lipoprotein receptor-related protein 8                                                                                  |
| XP_546705.1 | PREDICTED: similar to Carnitine O-palmitoyltransferase II, mitochondrial precursor (CPT II)                                                               |
| XP_546724.1 | PREDICTED: similar to hairy and enhancer of split 4                                                                                                       |
| XP_546725.2 | PREDICTED: hypothetical protein XP_546725                                                                                                                 |
| XP_546727.2 | PREDICTED: similar to actinfilin                                                                                                                          |
| XP_546730.2 | PREDICTED: similar to Ski oncogene (C-ski)                                                                                                                |
| XP_546733.2 | PREDICTED: similar to 1-phosphatidylinositol-4,5-bisphosphate phosphodiesterase-like 4 (Phosphoinositide phospholipase C-like 4) (Phospholipase C-like 4) |
| XP_546737.2 | PREDICTED: similar to mel transforming oncogene-like 1                                                                                                    |
| XP_546738.2 | PREDICTED: hypothetical protein XP_546738                                                                                                                 |
| XP_546739.2 | PREDICTED: similar to EGF-like-domain, multiple 3                                                                                                         |
| XP_546740.2 | PREDICTED: similar to tumor protein p73                                                                                                                   |
| XP_546741.2 | PREDICTED: similar to CCAAT displacement protein isoform a                                                                                                |
| XP_546743.2 | PREDICTED: similar to DNA fragmentation factor, 40 kD, beta polypeptide isoform 1                                                                         |



|             |                                                                                                                                                                             |
|-------------|-----------------------------------------------------------------------------------------------------------------------------------------------------------------------------|
| XP_546747.2 | PREDICTED: similar to chromodomain helicase DNA binding protein 5                                                                                                           |
| XP_546767.2 | PREDICTED: similar to Epithelial-cadherin precursor (E-cadherin) (Uvomorulin) (Cadherin-1) (CAM 120/80)                                                                     |
| XP_546771.2 | PREDICTED: similar to differentially expressed in FDCP 8 isoform 1                                                                                                          |
| XP_546773.2 | PREDICTED: similar to zinc finger protein 276 homolog                                                                                                                       |
| XP_546777.2 | PREDICTED: similar to Paraplegin (Spastic paraplegia protein 7)                                                                                                             |
| XP_546778.2 | PREDICTED: similar to ankyrin repeat domain 11                                                                                                                              |
| XP_546786.2 | PREDICTED: similar to Zinc finger protein 469                                                                                                                               |
| XP_546789.2 | PREDICTED: similar to junctophilin 3 isoform 1                                                                                                                              |
| XP_546805.2 | PREDICTED: similar to amino acid transporter                                                                                                                                |
| XP_546807.2 | PREDICTED: similar to pregnancy-induced growth inhibitor isoform 1                                                                                                          |
| XP_546809.2 | PREDICTED: similar to Cadherin-13 precursor (Truncated-cadherin) (T-cadherin) (T-cad) (Heart-cadherin) (H-cadherin) (P105)                                                  |
| XP_546810.2 | PREDICTED: similar to hydroxysteroid (17-beta) dehydrogenase 2                                                                                                              |
| XP_546812.2 | PREDICTED: similar to 1-phosphatidylinositol-4,5-bisphosphate phosphodiesterase gamma 2 (Phosphoinositide phospholipase C) (PLC-gamma-2) (Phospholipase C-gamma-2) (PLC-IV) |
| XP_546814.1 | PREDICTED: similar to gigaxonin                                                                                                                                             |
| XP_546816.2 | PREDICTED: similar to polycystin 1-like 2 isoform a                                                                                                                         |
| XP_546824.2 | PREDICTED: similar to a disintegrin-like and metalloprotease (repolysin type) with thrombospondin type 1 motif, 18 isoform 1 preproprotein                                  |
| XP_546826.2 | PREDICTED: similar to adenosine deaminase, tRNA-specific 1                                                                                                                  |
| XP_546836.1 | PREDICTED: similar to Conserved oligomeric Golgi complex component 4 isoform 1                                                                                              |
| XP_546845.2 | PREDICTED: similar to spinocerebellar ataxia 1 homolog                                                                                                                      |
| XP_546849.2 | PREDICTED: similar to Alpha-fetoprotein enhancer binding protein (AT motif-binding factor) (AT-binding transcription factor 1) isoform 1                                    |
| XP_546853.2 | PREDICTED: similar to nin one binding protein isoform 1                                                                                                                     |
| XP_546854.2 | PREDICTED: similar to nuclear factor of activated T-cells 5 isoform b isoform 1                                                                                             |
| XP_546856.2 | PREDICTED: similar to Telomeric repeat binding factor 2 (TTAGGG repeat binding factor 2) (Telomeric DNA binding protein) isoform 1                                          |
| XP_546861.2 | PREDICTED: similar to T16G12.5                                                                                                                                              |
| XP_546874.2 | PREDICTED: similar to Ran-binding protein 10 isoform 1                                                                                                                      |
| XP_546876.2 | PREDICTED: similar to Partitioning defective-6 homolog alpha (PAR-6 alpha) (PAR-6A) (PAR-6) (PAR6C) (Tax interaction protein 40) (TIP-40)                                   |
| XP_546877.2 | PREDICTED: similar to C27H2.3                                                                                                                                               |
| XP_546879.2 | PREDICTED: similar to pleckstrin homology domain containing, family G (with RhoGef domain) member 4                                                                         |
| XP_546880.2 | PREDICTED: similar to FH1/FH2 domains-containing protein (Formin homolog overexpressed in spleen) (FHOS) (Formin homology 2 domain containing 1)                            |
| XP_546882.2 | PREDICTED: similar to F-box and leucine-rich repeat protein 9                                                                                                               |
| XP_546884.2 | PREDICTED: similar to Exocyst complex component Sec6 (rSec6)                                                                                                                |
| XP_546890.2 | PREDICTED: similar to Cadherin-16 precursor (Kidney-specific cadherin) (Ksp-cadherin)                                                                                       |
| XP_546896.2 | PREDICTED: similar to Cadherin-8 precursor isoform 1                                                                                                                        |
| XP_546915.2 | PREDICTED: similar to cytoplasmic linker 2 isoform 1                                                                                                                        |
| XP_546921.1 | PREDICTED: similar to abhydrolase domain containing 11 isoform 1 isoform 1                                                                                                  |

|             |                                                                                                                                                                                                      |
|-------------|------------------------------------------------------------------------------------------------------------------------------------------------------------------------------------------------------|
| XP_546924.2 | PREDICTED: similar to Williams-Beuren syndrome chromosome region 24 homolog                                                                                                                          |
| XP_546927.2 | PREDICTED: similar to Frizzled 9 precursor (Frizzled-9) (Fz-9) (mFz9) (mFz3)                                                                                                                         |
| XP_546937.2 | PREDICTED: similar to RAS p21 protein activator 4                                                                                                                                                    |
| XP_546939.2 | PREDICTED: similar to CCAAT displacement protein isoform a                                                                                                                                           |
| XP_546947.2 | PREDICTED: similar to solute carrier family 12 (potassium/chloride transporters), member 9 isoform 1                                                                                                 |
| XP_546949.2 | PREDICTED: similar to zonadhesin isoform 3                                                                                                                                                           |
| XP_546953.2 | PREDICTED: similar to Procollagen C-proteinase enhancer protein precursor (PCPE) (Type I procollagen COOH-terminal proteinase enhancer) (Type 1 procollagen C-proteinase enhancer protein) isoform 2 |
| XP_546954.2 | PREDICTED: similar to leucine-rich repeats and calponin homology (CH) domain containing 4                                                                                                            |
| XP_546955.2 | PREDICTED: similar to HIV-1 Rev-binding protein-like protein                                                                                                                                         |
| XP_546956.2 | PREDICTED: similar to RIKEN cDNA 6430598A04 gene                                                                                                                                                     |
| XP_546957.2 | PREDICTED: similar to bin3, bicoid-interacting 3 isoform 1                                                                                                                                           |
| XP_546958.2 | PREDICTED: similar to Zinc finger CW-type PWWP domain protein 1 homolog                                                                                                                              |
| XP_546968.2 | PREDICTED: similar to gap junction protein, epsilon 1, 29kDa                                                                                                                                         |
| XP_546978.2 | PREDICTED: similar to pentatricopeptide repeat domain 1                                                                                                                                              |
| XP_546980.2 | PREDICTED: similar to myosin, heavy polypeptide 7, cardiac muscle, beta                                                                                                                              |
| XP_546981.2 | PREDICTED: similar to karyopherin alpha 2 (RAG cohort 1, importin alpha 1)                                                                                                                           |
| XP_546984.2 | PREDICTED: similar to Neuronal pentraxin-2 precursor (NP2) (Neuronal pentraxin II) (NP-II)                                                                                                           |
| XP_546991.1 | PREDICTED: similar to Protein C7orf26 homolog isoform 1                                                                                                                                              |
| XP_546996.2 | PREDICTED: similar to olfactory receptor Olr1768                                                                                                                                                     |
| XP_546997.2 | PREDICTED: similar to Zinc finger protein 38 (Zinc finger protein KOX25) (Zinc finger protein HF.12) (Zinc finger protein 3) (HZF3.1 protein)                                                        |
| XP_547000.2 | PREDICTED: similar to zinc finger protein 469                                                                                                                                                        |
| XP_547003.2 | PREDICTED: similar to Forkhead box protein K1 (Myocyte nuclear factor) (MNF)                                                                                                                         |
| XP_547004.2 | PREDICTED: similar to sidekick homolog 1                                                                                                                                                             |
| XP_547005.2 | PREDICTED: similar to caspase recruitment domain family, member 11                                                                                                                                   |
| XP_547006.2 | PREDICTED: hypothetical protein XP_547006                                                                                                                                                            |
| XP_547011.2 | PREDICTED: similar to CG9913-PB, isoform B                                                                                                                                                           |
| XP_547012.2 | PREDICTED: similar to nudix-type motif 1 isoform p22                                                                                                                                                 |
| XP_547015.2 | PREDICTED: similar to Putative MAP kinase-activating protein C22orf5                                                                                                                                 |
| XP_547017.2 | PREDICTED: similar to MICAL-like 2 isoform 1                                                                                                                                                         |
| XP_547024.2 | PREDICTED: similar to Integrin alpha-L precursor (Leukocyte adhesion glycoprotein LFA-1 alpha chain) (LFA-1A) (Leukocyte function associated molecule 1, alpha chain) (CD11a)                        |
| XP_547032.2 | PREDICTED: similar to ring finger protein 40 isoform 1 isoform 1                                                                                                                                     |
| XP_547033.2 | PREDICTED: similar to zinc finger protein 629                                                                                                                                                        |
| XP_547037.1 | PREDICTED: similar to 3 beta-hydroxy-delta 5-C27-steroid oxidoreductase                                                                                                                              |
| XP_547042.2 | PREDICTED: similar to zinc finger protein 646                                                                                                                                                        |

|             |                                                                                                                                                                                                          |
|-------------|----------------------------------------------------------------------------------------------------------------------------------------------------------------------------------------------------------|
| XP_547052.2 | PREDICTED: similar to androgen receptor coactivator ARA55                                                                                                                                                |
| XP_547054.2 | PREDICTED: similar to CG10338-PA                                                                                                                                                                         |
| XP_547057.2 | PREDICTED: similar to CD2 antigen (cytoplasmic tail) binding protein 2                                                                                                                                   |
| XP_547061.2 | PREDICTED: similar to CG8421-PA, isoform A                                                                                                                                                               |
| XP_547068.2 | PREDICTED: similar to T-box 6 isoform 1                                                                                                                                                                  |
| XP_547069.2 | PREDICTED: similar to Coronin-1A (Coronin-like protein p57) (Coronin-like protein A) (CLIPINA) (Tryptophan aspartate-containing coat protein) (TACO) isoform 1                                           |
| XP_547076.2 | PREDICTED: similar to General transcription factor 3C polypeptide 1 (Transcription factor IIIC-alpha subunit) (TF3C-alpha) (TFIIIC 220 kDa subunit) (TFIIIC220) (TFIIIC box B-binding subunit) isoform 1 |
| XP_547077.2 | PREDICTED: similar to Interleukin-4 receptor alpha chain precursor (IL-4R-alpha) (CD124 antigen)                                                                                                         |
| XP_547088.2 | PREDICTED: similar to Protein kinase C, beta type (PKC-beta) (PKC-B)                                                                                                                                     |
| XP_547090.2 | PREDICTED: similar to endoplasmic reticulum to nucleus signalling 2                                                                                                                                      |
| XP_547091.2 | PREDICTED: similar to Serine/threonine-protein kinase PLK1 (Polo-like kinase 1) (PLK-1) (Serine/threonine-protein kinase 13) (STPK13)                                                                    |
| XP_547094.2 | PREDICTED: similar to ubiquitin specific protease 31                                                                                                                                                     |
| XP_547095.2 | PREDICTED: similar to heparan sulfate D-glucosaminyl 3-O-sulfotransferase 2                                                                                                                              |
| XP_547101.2 | PREDICTED: similar to dynein, axonemal, heavy polypeptide 3                                                                                                                                              |
| XP_547109.2 | PREDICTED: similar to transmembrane channel-like gene family 5 (predicted)                                                                                                                               |
| XP_547110.2 | PREDICTED: similar to Tmc7 protein                                                                                                                                                                       |
| XP_547112.2 | PREDICTED: similar to nodal modulator 2 isoform 2                                                                                                                                                        |
| XP_547113.2 | PREDICTED: similar to ATP-binding cassette, sub-family C, member 6                                                                                                                                       |
| XP_547119.2 | PREDICTED: similar to MKL/myocardin-like protein 2 (Myocardin-related transcription factor B) (MRTF-B) (Megakaryoblastic leukemia 2) isoform 1                                                           |
| XP_547123.2 | PREDICTED: similar to thioredoxin domain containing 11                                                                                                                                                   |
| XP_547132.2 | PREDICTED: similar to glutamate receptor, ionotropic, NMDA2A (epsilon 1)                                                                                                                                 |
| XP_547133.2 | PREDICTED: similar to Phosphomannomutase 2 (PMM 2)                                                                                                                                                       |
| XP_547141.2 | PREDICTED: similar to periplakin                                                                                                                                                                         |
| XP_547148.2 | PREDICTED: similar to GLIS family zinc finger 2                                                                                                                                                          |
| XP_547151.2 | PREDICTED: similar to Adenylate cyclase, type IX (ATP pyrophosphate-lyase 9) (Adenylyl cyclase 9)                                                                                                        |
| XP_547160.2 | PREDICTED: similar to Zinc finger protein 263 (Zinc finger protein FPM315)                                                                                                                               |
| XP_547161.2 | PREDICTED: similar to Mediterranean fever protein                                                                                                                                                        |
| XP_547168.1 | PREDICTED: similar to claudin 6                                                                                                                                                                          |
| XP_547170.2 | PREDICTED: similar to protein kinase Myt1 isoform 1                                                                                                                                                      |
| XP_547172.2 | PREDICTED: similar to FLYWCH-type zinc finger 1 isoform a                                                                                                                                                |
| XP_547180.2 | PREDICTED: similar to Deoxyribonuclease I-like 2 precursor (DNase I-like 2) (DNase I homolog protein DHP1)                                                                                               |
| XP_547181.2 | PREDICTED: similar to zinc finger protein 598                                                                                                                                                            |
| XP_547188.1 | PREDICTED: similar to fumarylacetoacetate hydrolase domain containing 1 isoform 2                                                                                                                        |
| XP_547189.2 | PREDICTED: similar to insulin-like growth factor binding protein, acid labile subunit                                                                                                                    |
| XP_547196.2 | PREDICTED: hypothetical protein XP_547196                                                                                                                                                                |

|             |                                                                                                                                                                                                                                 |
|-------------|---------------------------------------------------------------------------------------------------------------------------------------------------------------------------------------------------------------------------------|
| XP_547200.2 | PREDICTED: similar to tryptase alpha/beta 1 precursor                                                                                                                                                                           |
| XP_547216.2 | PREDICTED: similar to phosphatidylinositol glycan, class Q                                                                                                                                                                      |
| XP_547217.2 | PREDICTED: hypothetical protein XP_547217                                                                                                                                                                                       |
| XP_547236.2 | PREDICTED: similar to solute carrier family 6, member 17                                                                                                                                                                        |
| XP_547239.2 | PREDICTED: similar to epidermal growth factor receptor pathway substrate 8-like protein 3 isoform b                                                                                                                             |
| XP_547241.2 | PREDICTED: similar to Amphoterin-induced protein 1 precursor (Alivin-2)                                                                                                                                                         |
| XP_547247.2 | PREDICTED: similar to WD repeat domain 47 isoform 1                                                                                                                                                                             |
| XP_547252.2 | PREDICTED: similar to solute carrier family 25 member 24 isoform 1                                                                                                                                                              |
| XP_547265.2 | PREDICTED: similar to stromal cell derived factor receptor 2                                                                                                                                                                    |
| XP_547272.2 | PREDICTED: similar to transmembrane protein 56                                                                                                                                                                                  |
| XP_547290.2 | PREDICTED: similar to guanylate nucleotide binding protein 4                                                                                                                                                                    |
| XP_547291.2 | PREDICTED: similar to guanylate-binding protein 5                                                                                                                                                                               |
| XP_547293.2 | PREDICTED: similar to Interferon-induced guanylate-binding protein 1 (GTP-binding protein 1) (Guanine nucleotide-binding protein 1) (HuGBP-1) isoform 1                                                                         |
| XP_547299.2 | PREDICTED: similar to calcium activated chloride channel 1 precursor                                                                                                                                                            |
| XP_547305.2 | PREDICTED: similar to synapse defective 1, Rho GTPase, homolog 1                                                                                                                                                                |
| XP_547319.2 | PREDICTED: similar to interferon-induced, hepatitis C-associated microtubular aggregat                                                                                                                                          |
| XP_547325.2 | PREDICTED: similar to adenylate kinase 5 isoform 1                                                                                                                                                                              |
| XP_547328.2 | PREDICTED: similar to Acyl-CoA dehydrogenase, medium-chain specific, mitochondrial precursor (MCAD)                                                                                                                             |
| XP_547330.2 | PREDICTED: similar to LIM homeobox 8                                                                                                                                                                                            |
| XP_547358.2 | PREDICTED: similar to Leiomodrin 1 (Leiomodrin, muscle form) (64 kDa autoantigen D1) (64 kDa autoantigen 1D) (64 kDa autoantigen 1D3) (Thyroid-associated ophthalmopathy autoantigen) (Smooth muscle leiomodrin) (SM-Lmod)      |
| XP_547363.2 | PREDICTED: similar to eEF1A2 binding protein                                                                                                                                                                                    |
| XP_547366.2 | PREDICTED: similar to Kinesin family member 21B                                                                                                                                                                                 |
| XP_547368.2 | PREDICTED: similar to calmodulin regulated spectrin-associated protein 1-like 1                                                                                                                                                 |
| XP_547385.2 | PREDICTED: similar to Fas apoptotic inhibitory molecule 3                                                                                                                                                                       |
| XP_547389.2 | PREDICTED: similar to plexin A2                                                                                                                                                                                                 |
| XP_547393.2 | PREDICTED: similar to Laminin beta-3 chain precursor (Laminin 5 beta 3) (Laminin B1k chain) (Kalinin B1 chain)                                                                                                                  |
| XP_547394.2 | PREDICTED: similar to CG3735-PA                                                                                                                                                                                                 |
| XP_547398.2 | PREDICTED: similar to DKFZP434B168 protein isoform 1                                                                                                                                                                            |
| XP_547404.2 | PREDICTED: similar to B0432.8                                                                                                                                                                                                   |
| XP_547408.2 | PREDICTED: similar to ribosomal protein S6 kinase, 52kDa, polypeptide 1                                                                                                                                                         |
| XP_547425.2 | PREDICTED: similar to Voltage-dependent R-type calcium channel alpha-1E subunit (Voltage-gated calcium channel alpha subunit Cav2.3) (Calcium channel, L type, alpha-1 polypeptide, isoform 6) (Brain calcium channel II) (BII) |
| XP_547436.2 | PREDICTED: similar to CG7206-PA, isoform A                                                                                                                                                                                      |
| XP_547438.2 | PREDICTED: similar to High Incidence of Males (increased X chromosome loss) family member (him-4)                                                                                                                               |
| XP_547442.2 | PREDICTED: hypothetical protein XP_547442                                                                                                                                                                                       |

|             |                                                                                                                                                                                                                                                                        |
|-------------|------------------------------------------------------------------------------------------------------------------------------------------------------------------------------------------------------------------------------------------------------------------------|
| XP_547443.2 | PREDICTED: similar to Podocin                                                                                                                                                                                                                                          |
| XP_547449.2 | PREDICTED: similar to regucalcin gene promotor region related protein                                                                                                                                                                                                  |
| XP_547455.2 | PREDICTED: similar to tenascin N                                                                                                                                                                                                                                       |
| XP_547457.2 | PREDICTED: similar to aspartyl-tRNA synthetase 2 (mitochondrial)                                                                                                                                                                                                       |
| XP_547468.2 | PREDICTED: hypothetical protein XP_547468                                                                                                                                                                                                                              |
| XP_547475.2 | PREDICTED: similar to basic leucine zipper nuclear factor 1                                                                                                                                                                                                            |
| XP_547484.2 | PREDICTED: similar to maelstrom homolog isoform 1                                                                                                                                                                                                                      |
| XP_547485.2 | PREDICTED: similar to liver-specific bHLH-Zip transcription factor                                                                                                                                                                                                     |
| XP_547491.2 | PREDICTED: similar to exonuclease 1 isoform b isoform 1                                                                                                                                                                                                                |
| XP_547493.2 | PREDICTED: similar to phospholipase D family, member 3                                                                                                                                                                                                                 |
| XP_547496.2 | PREDICTED: similar to RAC-gamma serine/threonine-protein kinase (RAC-PK-gamma) (Protein kinase Akt-3) (Protein kinase B, gamma) (PKB gamma) (STK-2) isoform 1                                                                                                          |
| XP_547503.2 | PREDICTED: similar to Presenilin 2 (PS-2) (STM-2) (E5-1) (AD3LP) (AD5)                                                                                                                                                                                                 |
| XP_547504.2 | PREDICTED: similar to 1D-myo-inositol-trisphosphate 3-kinase B                                                                                                                                                                                                         |
| XP_547511.2 | PREDICTED: similar to Enabled protein homolog                                                                                                                                                                                                                          |
| XP_547518.2 | PREDICTED: similar to Apoptosis stimulating of p53 protein 2 (Tumor suppressor p53-binding protein 2) (p53-binding protein 2) (53BP2) (Bcl2-binding protein) (Bbp)                                                                                                     |
| XP_547523.2 | PREDICTED: similar to Rho guanine nucleotide exchange factor (GEF) 11 isoform 2                                                                                                                                                                                        |
| XP_547524.2 | PREDICTED: similar to MEGF10 protein                                                                                                                                                                                                                                   |
| XP_547526.1 | PREDICTED: similar to Insulin receptor-related protein precursor (IRR) (IR-related receptor)                                                                                                                                                                           |
| XP_547531.2 | PREDICTED: similar to nestin                                                                                                                                                                                                                                           |
| XP_547533.2 | PREDICTED: similar to IQ motif containing GTPase activating protein 3                                                                                                                                                                                                  |
| XP_547544.2 | PREDICTED: similar to Dingo protein isoform 1                                                                                                                                                                                                                          |
| XP_547545.2 | PREDICTED: similar to misato                                                                                                                                                                                                                                           |
| XP_547547.2 | PREDICTED: similar to pyruvate kinase, liver and RBC isoform 1                                                                                                                                                                                                         |
| XP_547550.2 | PREDICTED: hypothetical protein XP_547550 isoform 1                                                                                                                                                                                                                    |
| XP_547559.2 | PREDICTED: similar to Zinc finger and BTB domain containing protein 7B (Zinc finger protein 67 homolog) (Zfp-67) (Zinc finger protein Th-POK) (T-helper-inducing POZ/Kruppel-like factor) (Kruppel-related zinc finger protein cKrox) (hcKrox) (Zinc finger and BTB... |
| XP_547562.2 | PREDICTED: similar to Pygopus homolog 2                                                                                                                                                                                                                                |
| XP_547569.2 | PREDICTED: similar to Potential phospholipid-transporting ATPase ID (ATPase class I type 8B member 2)                                                                                                                                                                  |
| XP_547574.1 | PREDICTED: similar to solute carrier family 39 (zinc transporter), member 1                                                                                                                                                                                            |
| XP_547575.1 | PREDICTED: similar to GATA zinc finger domain containing 2B isoform 1                                                                                                                                                                                                  |
| XP_547577.2 | PREDICTED: similar to Atrial natriuretic peptide receptor A precursor (ANP-A) (ANPRA) (GC-A) (Guanylate cyclase) (NPR-A) (Atrial natriuretic peptide A-type receptor)                                                                                                  |
| XP_547589.2 | PREDICTED: similar to lipoxygenase homology domains 1                                                                                                                                                                                                                  |
| XP_547590.2 | PREDICTED: similar to arkadia-like 2                                                                                                                                                                                                                                   |
| XP_547594.2 | PREDICTED: similar to SET-binding protein (SEB)                                                                                                                                                                                                                        |
| XP_547599.2 | PREDICTED: similar to phosphoinositide-3-kinase, class 3                                                                                                                                                                                                               |
| XP_547618.2 | PREDICTED: hypothetical protein XP_547618                                                                                                                                                                                                                              |

|             |                                                                                                                                                                         |
|-------------|-------------------------------------------------------------------------------------------------------------------------------------------------------------------------|
| XP_547622.2 | PREDICTED: similar to Desmoglein-2 precursor (HDGC)                                                                                                                     |
| XP_547623.2 | PREDICTED: similar to desmocollin 1 isoform Dsc1a preproprotein                                                                                                         |
| XP_547629.2 | PREDICTED: similar to Transcription initiation factor TFIID 105 kDa subunit (TAFII-105) (TAFII105)                                                                      |
| XP_547633.2 | PREDICTED: similar to zinc finger protein 521 isoform 1                                                                                                                 |
| XP_547643.2 | PREDICTED: similar to mindbomb homolog 1                                                                                                                                |
| XP_547657.2 | PREDICTED: similar to SMC hinge domain containing 1                                                                                                                     |
| XP_547667.2 | PREDICTED: similar to C34E11.3                                                                                                                                          |
| XP_547676.2 | PREDICTED: similar to CG8486-PA, isoform A                                                                                                                              |
| XP_547682.2 | PREDICTED: similar to AFG3-like protein 2 (Paraplegin-like protein)                                                                                                     |
| XP_547690.2 | PREDICTED: similar to acetyl-coenzyme A acyltransferase 2                                                                                                               |
| XP_547695.2 | PREDICTED: similar to zinc finger and BTB domain containing 36                                                                                                          |
| XP_547697.2 | PREDICTED: similar to zinc finger protein 496                                                                                                                           |
| XP_547735.2 | PREDICTED: similar to Zinc finger protein 409                                                                                                                           |
| XP_547747.2 | PREDICTED: similar to CG10889-PA                                                                                                                                        |
| XP_547762.2 | PREDICTED: similar to coagulation factor C homolog, cochlin precursor                                                                                                   |
| XP_547766.2 | PREDICTED: similar to A-kinase anchor protein 6 isoform 1                                                                                                               |
| XP_547771.2 | PREDICTED: similar to cofilin 2                                                                                                                                         |
| XP_547772.1 | PREDICTED: similar to CG15896-PA                                                                                                                                        |
| XP_547781.2 | PREDICTED: similar to Tetratricopeptide repeat protein 6 (TPR repeat protein 6)                                                                                         |
| XP_547782.2 | PREDICTED: similar to C-type lectin domain family 14, member A                                                                                                          |
| XP_547791.2 | PREDICTED: similar to B0024.8                                                                                                                                           |
| XP_547810.1 | PREDICTED: similar to Protein C14orf31 isoform 1                                                                                                                        |
| XP_547812.1 | PREDICTED: similar to L-lactate dehydrogenase A chain (LDH-A) (LDH muscle subunit) (LDH-M) (Proliferation-inducing gene 19 protein)                                     |
| XP_547813.2 | PREDICTED: similar to ERO1-like protein alpha precursor (ERO1-Lalpha) (Oxidoreductin 1-lalpha) (Endoplasmic oxidoreductin 1-like protein) (ERO1-L)                      |
| XP_547831.2 | PREDICTED: similar to Translation initiation factor eIF-2B gamma subunit (eIF-2B GDP-GTP exchange factor)                                                               |
| XP_547832.2 | PREDICTED: similar to Exocyst complex component Sec10 (hSec10)                                                                                                          |
| XP_547834.2 | PREDICTED: similar to solute carrier family 35, member F4                                                                                                               |
| XP_547837.1 | PREDICTED: hypothetical protein XP_547837                                                                                                                               |
| XP_547840.2 | PREDICTED: similar to Homeobox protein SIX6 (Sine oculis homeobox homolog 6) (Optic homeobox 2) (Six9 protein)                                                          |
| XP_547842.2 | PREDICTED: similar to sine oculis homeobox homolog 4                                                                                                                    |
| XP_547843.2 | PREDICTED: similar to transmembrane protein 30B                                                                                                                         |
| XP_547851.2 | PREDICTED: similar to spectrin repeat containing, nuclear envelope 2 isoform e isoform 1                                                                                |
| XP_547857.2 | PREDICTED: similar to farnesyltransferase, CAAX box, beta                                                                                                               |
| XP_547867.2 | PREDICTED: similar to zinc finger, FYVE domain containing 26                                                                                                            |
| XP_547885.2 | PREDICTED: similar to RNA polymerase transcriptional regulation mediator, subunit 6 homolog (Activator-recruited cofactor 33 kDa component) (ARC33) (NY-REN-28 antigen) |

|             |                                                                                                                                                                                                                |
|-------------|----------------------------------------------------------------------------------------------------------------------------------------------------------------------------------------------------------------|
| XP_547886.2 | PREDICTED: similar to Tetratricopeptide repeat protein 9 (TPR repeat protein 9)                                                                                                                                |
| XP_547887.2 | PREDICTED: similar to Mitogen-activated protein kinase kinase kinase 9 (Mixed lineage kinase 1)                                                                                                                |
| XP_547890.2 | PREDICTED: similar to Zinc finger FYVE domain containing protein 1 isoform 1                                                                                                                                   |
| XP_547891.2 | PREDICTED: similar to papilin                                                                                                                                                                                  |
| XP_547892.2 | PREDICTED: similar to Peroxisomal acyl-coenzyme A thioester hydrolase 2a (Peroxisomal long-chain acyl-coA thioesterase 2) (ZAP128) (CTE-Ia)                                                                    |
| XP_547893.2 | PREDICTED: similar to Peroxisomal acyl coenzyme A thioester hydrolase 1b (Peroxisomal long-chain acyl-coA thioesterase 1b) (PTE-1b) (PTE-2b)                                                                   |
| XP_547894.2 | PREDICTED: similar to Cytosolic acyl coenzyme A thioester hydrolase, inducible (Long chain acyl-CoA thioester hydrolase) (Long chain acyl-CoA hydrolase) (CTE-I) (CTE-Ib)                                      |
| XP_547896.2 | PREDICTED: similar to Paraneoplastic antigen Ma1 (Neuron- and testis-specific protein 1) (37 kDa neuronal protein)                                                                                             |
| XP_547897.2 | PREDICTED: similar to transcriptional regulating factor 1                                                                                                                                                      |
| XP_547901.2 | PREDICTED: similar to aldehyde dehydrogenase family 6, subfamily A1                                                                                                                                            |
| XP_547903.2 | PREDICTED: similar to ATP-binding cassette, sub-family D, member 4 isoform 1 isoform 1                                                                                                                         |
| XP_547904.1 | PREDICTED: similar to Protein C14orf115                                                                                                                                                                        |
| XP_547905.2 | PREDICTED: similar to HESB like domain containing 1                                                                                                                                                            |
| XP_547912.2 | PREDICTED: similar to Serine/threonine-protein kinase Nek9 (NimA-related protein kinase 9) (Nercc1 kinase) (NIMA-related kinase 8) (Nek8) isoform 2                                                            |
| XP_547914.1 | PREDICTED: similar to Proto-oncogene protein c-fos (Cellular oncogene fos) (G0/G1 switch regulatory protein 7) isoform 1                                                                                       |
| XP_547930.2 | PREDICTED: similar to Protein C14orf133 homolog                                                                                                                                                                |
| XP_547934.2 | PREDICTED: similar to Neurexin-3-alpha precursor (Neurexin III-alpha) isoform 1                                                                                                                                |
| XP_547945.2 | PREDICTED: similar to Tyrosine-protein phosphatase, non-receptor type 21 (Protein-tyrosine phosphatase D1)                                                                                                     |
| XP_547950.2 | PREDICTED: similar to tyrosyl-DNA phosphodiesterase 1                                                                                                                                                          |
| XP_547959.2 | PREDICTED: similar to HEAT-like repeat-containing protein isoform 1                                                                                                                                            |
| XP_547961.2 | PREDICTED: similar to Alpha-1-antitrypsin precursor (Alpha-1 protease inhibitor) (Alpha-1-antiprotease)                                                                                                        |
| XP_547978.2 | PREDICTED: similar to Mitochondrial carnitine/acylcarnitine carrier protein CACL (CACT-like)                                                                                                                   |
| XP_547980.2 | PREDICTED: similar to pre-mRNA splicing factor-like                                                                                                                                                            |
| XP_547981.2 | PREDICTED: similar to likely ortholog of rat brain-enriched guanylate kinase-associated protein                                                                                                                |
| XP_547990.2 | PREDICTED: similar to CDC42-binding protein kinase beta isoform 1                                                                                                                                              |
| XP_547996.2 | PREDICTED: similar to protein phosphatase 1, regulatory (inhibitor) subunit 13B                                                                                                                                |
| XP_547997.2 | PREDICTED: similar to CG14535-PA                                                                                                                                                                               |
| XP_547999.2 | PREDICTED: similar to CG33556-PA                                                                                                                                                                               |
| XP_548004.2 | PREDICTED: similar to Jagged-2 precursor (Jagged2) (HJ2)                                                                                                                                                       |
| XP_548005.2 | PREDICTED: similar to Transcription factor IIIB 90 kDa subunit (TFIIIB90) (hTFIIIB90) (B-related factor 1) (BRF-1) (hBRF) (TATA box-binding protein-associated factor, RNA polymerase III, subunit 2) (TAF3B2) |
| XP_548020.2 | PREDICTED: similar to ATP-binding cassette, sub-family A member 8                                                                                                                                              |
| XP_548025.2 | PREDICTED: similar to Axin 2 (Axis inhibition protein 2) (Conductin) (Axin-like protein) (Axil) isoform 1                                                                                                      |
| XP_548026.2 | PREDICTED: similar to Protein kinase C, alpha type (PKC-alpha) (PKC-A)                                                                                                                                         |
| XP_548027.2 | PREDICTED: similar to Voltage-dependent calcium channel gamma-5 subunit (Neuronal voltage-gated calcium channel gamma-5 subunit) isoform 1                                                                     |
| XP_548046.2 | PREDICTED: similar to intramembrane protease 5                                                                                                                                                                 |

|             |                                                                                                                                                                                  |
|-------------|----------------------------------------------------------------------------------------------------------------------------------------------------------------------------------|
| XP_548048.2 | PREDICTED: similar to pleckstrin homology domain containing, family M (with RUN domain) member 1                                                                                 |
| XP_548049.2 | PREDICTED: similar to Mitogen-activated protein kinase kinase kinase 14 (NF-kappa beta-inducing kinase) (Serine/threonine-protein kinase NIK) (HsNIK)                            |
| XP_548052.2 | PREDICTED: similar to phospholipase C delta 3                                                                                                                                    |
| XP_548054.2 | PREDICTED: similar to C1q-related factor precursor (Complement component 1 Q subcomponent-like 1)                                                                                |
| XP_548055.2 | PREDICTED: similar to kinesin family member 18A                                                                                                                                  |
| XP_548058.2 | PREDICTED: similar to 116 kDa U5 small nuclear ribonucleoprotein component (U5 snRNP-specific protein, 116 kDa) (U5-116 kDa) (Elongation factor Tu GTP binding domain protein 2) |
| XP_548074.1 | PREDICTED: hypothetical protein XP_548074                                                                                                                                        |
| XP_548078.2 | PREDICTED: similar to RUN domain containing 1                                                                                                                                    |
| XP_548082.2 | PREDICTED: similar to WNK lysine deficient protein kinase 4                                                                                                                      |
| XP_548083.2 | PREDICTED: similar to Contactin-associated protein 1 precursor (Caspr) (Caspr1) (Neurexin 4) (Neurexin IV) (p190)                                                                |
| XP_548084.2 | PREDICTED: similar to CG2174-PA                                                                                                                                                  |
| XP_548093.2 | PREDICTED: similar to heat shock protein, alpha-crystallin-related, B9                                                                                                           |
| XP_548095.2 | PREDICTED: similar to zinc finger protein 533                                                                                                                                    |
| XP_548096.2 | PREDICTED: similar to CG13502-PA, isoform A                                                                                                                                      |
| XP_548097.1 | PREDICTED: similar to 5-nucleotidase, cytosolic III isoform 1                                                                                                                    |
| XP_548099.2 | PREDICTED: similar to keratin 17n                                                                                                                                                |
| XP_548100.1 | PREDICTED: similar to type I keratin KA17 isoform 1                                                                                                                              |
| XP_548101.2 | PREDICTED: similar to Keratin, type I cytoskeletal 16 (Cytokeratin 16) (K16) (CK 16)                                                                                             |
| XP_548106.2 | PREDICTED: similar to keratin 13 isoform a isoform 1                                                                                                                             |
| XP_548109.2 | PREDICTED: similar to type I hair keratin 8                                                                                                                                      |
| XP_548110.2 | PREDICTED: similar to type I hair keratin 8                                                                                                                                      |
| XP_548111.2 | PREDICTED: similar to type I hair keratin KA27                                                                                                                                   |
| XP_548127.1 | PREDICTED: similar to keratin 25C                                                                                                                                                |
| XP_548128.2 | PREDICTED: similar to keratin 25B isoform 1                                                                                                                                      |
| XP_548129.2 | PREDICTED: similar to keratin 25A                                                                                                                                                |
| XP_548138.2 | PREDICTED: similar to 26S proteasome non-ATPase regulatory subunit 3 (26S proteasome regulatory subunit S3) (Proteasome subunit p58)                                             |
| XP_548147.2 | PREDICTED: similar to Cell division cycle 2-related protein kinase 7 (CDC2-related protein kinase 7) (CrkRS) isoform 1                                                           |
| XP_548154.2 | PREDICTED: similar to phosphatidylinositol-4-phosphate 5-kinase type II beta isoform a                                                                                           |
| XP_548158.2 | PREDICTED: similar to Rho GTPase activating protein 21                                                                                                                           |
| XP_548160.2 | PREDICTED: similar to GPR158-like 1                                                                                                                                              |
| XP_548163.2 | PREDICTED: similar to ProSAPiP2 protein                                                                                                                                          |
| XP_548165.2 | PREDICTED: similar to Oxysterol binding protein-related protein 7 (OSBP-related protein 7) (ORP-7)                                                                               |
| XP_548166.2 | PREDICTED: similar to secernin 2                                                                                                                                                 |
| XP_548167.2 | PREDICTED: similar to Sp6 transcription factor                                                                                                                                   |
| XP_548181.2 | PREDICTED: similar to ATP synthase, H <sup>+</sup> transporting, mitochondrial F0 complex, subunit c, isoform 1 isoform 1                                                        |



|             |                                                                                                                                                                                                                    |
|-------------|--------------------------------------------------------------------------------------------------------------------------------------------------------------------------------------------------------------------|
| XP_548187.2 | PREDICTED: similar to UDP-GalNAc:Neu5Aalpha2-3Galbeta-R beta1,4-N-acetylgalactosaminyltransferase                                                                                                                  |
| XP_548191.2 | PREDICTED: similar to Tumor necrosis factor receptor superfamily member 16 precursor (Low-affinity nerve growth factor receptor) (NGF receptor) (Gp80-LNGFR) (p75 ICD) (Low affinity neurotrophin receptor p75NTR) |
| XP_548195.2 | PREDICTED: similar to pyruvate dehydrogenase kinase, isoenzyme 2                                                                                                                                                   |
| XP_548196.2 | PREDICTED: similar to Neurabin-2 (Neurabin-II) (Neural tissue-specific F-actin binding protein II) (Protein phosphatase 1 regulatory subunit 9B) (Spinophilin) (p130) (PP1bp134) isoform 1                         |
| XP_548199.2 | PREDICTED: similar to essential meiotic endonuclease 1 homolog 1 isoform 1                                                                                                                                         |
| XP_548200.2 | PREDICTED: similar to CG3408-PA                                                                                                                                                                                    |
| XP_548202.2 | PREDICTED: similar to sperm protein SSP411                                                                                                                                                                         |
| XP_548203.2 | PREDICTED: similar to Voltage-dependent T-type calcium channel alpha-1G subunit (Voltage-gated calcium channel alpha subunit Cav3.1) (Cav3.1c) (NBR13) isoform 1                                                   |
| XP_548204.2 | PREDICTED: similar to Canalicular multispecific organic anion transporter 2 (Multidrug resistance-associated protein 3) (Multi-specific organic anion transporter-D) (MOAT-D)                                      |
| XP_548223.2 | PREDICTED: similar to tripartite motif-containing 25                                                                                                                                                               |
| XP_548229.2 | PREDICTED: similar to Eosinophil peroxidase precursor (EPO)                                                                                                                                                        |
| XP_548232.2 | PREDICTED: similar to Peripheral-type benzodiazepine receptor-associated protein 1 (PRAX-1) (Peripheral benzodiazepine receptor interacting protein) (PBR-IP) (RIM binding protein 1) (RIM-BP1)                    |
| XP_548236.1 | PREDICTED: similar to CG6729-PA isoform 1                                                                                                                                                                          |
| XP_548243.1 | PREDICTED: similar to Mitochondrial import receptor subunit TOM22 homolog (Translocase of outer membrane 22 kDa subunit homolog) (hTom22) (1C9-2)                                                                  |
| XP_548248.2 | PREDICTED: similar to myosin head domain containing 1                                                                                                                                                              |
| XP_548255.2 | PREDICTED: similar to TAF15 RNA polymerase II, TATA box binding protein (TBP)-associated factor isoform 1                                                                                                          |
| XP_548257.2 | PREDICTED: similar to growth arrest-specific 2 like 2                                                                                                                                                              |
| XP_548262.2 | PREDICTED: similar to Notchless homolog 1 (WD-repeat protein HUSSY-07)                                                                                                                                             |
| XP_548265.2 | PREDICTED: similar to ligase III, DNA, ATP-dependent                                                                                                                                                               |
| XP_548266.2 | PREDICTED: similar to chaperonin containing TCP1, subunit 6B isoform 1                                                                                                                                             |
| XP_548267.2 | PREDICTED: similar to CG14446-PA                                                                                                                                                                                   |
| XP_548270.2 | PREDICTED: similar to amiloride-sensitive cation channel 1, neuronal (degenerin)                                                                                                                                   |
| XP_548273.2 | PREDICTED: similar to Myosin Id                                                                                                                                                                                    |
| XP_548276.2 | PREDICTED: similar to chromosome fragility associated gene 1                                                                                                                                                       |
| XP_548277.2 | PREDICTED: similar to cytokine receptor-like factor 3                                                                                                                                                              |
| XP_548278.2 | PREDICTED: similar to joined to JAZF1                                                                                                                                                                              |
| XP_548285.2 | PREDICTED: similar to sterile alpha and TIR motif containing 1                                                                                                                                                     |
| XP_548291.2 | PREDICTED: similar to NIMA-related kinase 8                                                                                                                                                                        |
| XP_548294.2 | PREDICTED: similar to PHD finger protein 12 (PHD factor 1) (Pf1) isoform 1                                                                                                                                         |
| XP_548299.2 | PREDICTED: similar to abhydrolase domain containing 1 (predicted)                                                                                                                                                  |
| XP_548302.2 | PREDICTED: similar to coronin relative protein isoform 1                                                                                                                                                           |
| XP_548303.2 | PREDICTED: similar to slingshot 2 isoform 1                                                                                                                                                                        |
| XP_548305.2 | PREDICTED: similar to golgi SNAP receptor complex member 1 isoform 2                                                                                                                                               |
| XP_548317.2 | PREDICTED: similar to reticulon 4 receptor-like 1                                                                                                                                                                  |

|             |                                                                                                                                                                                                                           |
|-------------|---------------------------------------------------------------------------------------------------------------------------------------------------------------------------------------------------------------------------|
| XP_548318.2 | PREDICTED: similar to Hypermethylated in cancer 1 protein (Hic-1) (Zinc finger and BTB domain containing protein 29)                                                                                                      |
| XP_548323.2 | PREDICTED: similar to Putative eukaryotic translation initiation factor 3 subunit (eIF-3) isoform 1                                                                                                                       |
| XP_548324.2 | PREDICTED: similar to GTPase activating RANGAP domain-like 4                                                                                                                                                              |
| XP_548338.2 | PREDICTED: similar to transient receptor potential cation channel, subfamily V, member 3                                                                                                                                  |
| XP_548339.1 | PREDICTED: similar to Carbohydrate kinase-like protein                                                                                                                                                                    |
| XP_548344.1 | PREDICTED: similar to P2X purinoceptor 1 (ATP receptor) (P2X1) (Purinergic receptor) isoform 1                                                                                                                            |
| XP_548346.2 | PREDICTED: similar to mitochondrial ribosomal protein L41 (predicted)                                                                                                                                                     |
| XP_548361.2 | PREDICTED: similar to CG3880-PA                                                                                                                                                                                           |
| XP_548362.1 | PREDICTED: similar to Ectonucleoside triphosphate diphosphohydrolase 2 (NTPDase2) (Ecto-ATPase) (CD39 antigen-like 1) isoform 1                                                                                           |
| XP_548365.2 | PREDICTED: similar to apical early endosomal glycoprotein                                                                                                                                                                 |
| XP_548367.2 | PREDICTED: similar to CG15216-PA                                                                                                                                                                                          |
| XP_548372.2 | PREDICTED: similar to small nuclear RNA activating complex, polypeptide 4, 190kDa                                                                                                                                         |
| XP_548374.2 | PREDICTED: hypothetical protein XP_548374                                                                                                                                                                                 |
| XP_548378.2 | PREDICTED: similar to calmodulin regulated spectrin-associated protein 1                                                                                                                                                  |
| XP_548379.2 | PREDICTED: similar to potassium channel, subfamily T, member 1 isoform 1 [Canis familiaris]                                                                                                                               |
| XP_548389.2 | PREDICTED: similar to surfeit 2                                                                                                                                                                                           |
| XP_548391.2 | PREDICTED: similar to NIMA (never in mitosis gene a)-related kinase 4                                                                                                                                                     |
| XP_548397.2 | PREDICTED: similar to ADAMTS-like 2                                                                                                                                                                                       |
| XP_548398.2 | PREDICTED: similar to sarcosine dehydrogenase isoform 1                                                                                                                                                                   |
| XP_548404.2 | PREDICTED: similar to BarH-like 1                                                                                                                                                                                         |
| XP_548407.2 | PREDICTED: similar to Rap guanine nucleotide exchange factor (GEF) 1                                                                                                                                                      |
| XP_548411.2 | PREDICTED: similar to laminin, gamma 3 precursor                                                                                                                                                                          |
| XP_548413.2 | PREDICTED: similar to v-abl Abelson murine leukemia viral oncogene homolog 1 isoform a                                                                                                                                    |
| XP_548414.2 | PREDICTED: similar to hemicentin 1                                                                                                                                                                                        |
| XP_548424.2 | PREDICTED: similar to regulatory subunit PR 53 of protein phosphatase 2A isoform b                                                                                                                                        |
| XP_548435.2 | PREDICTED: similar to WD repeat domain 34                                                                                                                                                                                 |
| XP_548438.2 | PREDICTED: similar to solute carrier family 27 (fatty acid transporter), member 4                                                                                                                                         |
| XP_548446.2 | PREDICTED: similar to cyclin-dependent kinase 9<br>PREDICTED: similar to Ubiquitin-conjugating enzyme E2 I (Ubiquitin-protein ligase I) (Ubiquitin carrier protein I) (SUMO-1-protein ligase) (SUMO-1 conjugating enzyme) |
| XP_548453.2 | (Ubiquitin-conjugating enzyme UbcE2A)                                                                                                                                                                                     |
| XP_548461.2 | PREDICTED: similar to LIM homeobox protein 2 isoform 1                                                                                                                                                                    |
| XP_548462.2 | PREDICTED: similar to crumbs homolog 2                                                                                                                                                                                    |
| XP_548475.2 | PREDICTED: similar to LIM homeobox protein 6 isoform 1                                                                                                                                                                    |
| XP_548476.2 | PREDICTED: similar to H23L24.3a                                                                                                                                                                                           |
| XP_548496.2 | PREDICTED: similar to Rho GTPase activating protein 15                                                                                                                                                                    |
| XP_548503.2 | PREDICTED: similar to zinc finger protein 658                                                                                                                                                                             |

|             |                                                                                                                                                                                                  |
|-------------|--------------------------------------------------------------------------------------------------------------------------------------------------------------------------------------------------|
| XP_548512.2 | PREDICTED: similar to Ig kappa chain V-II region 26-10                                                                                                                                           |
| XP_548513.2 | PREDICTED: similar to keratin associated protein 10-7                                                                                                                                            |
| XP_548532.2 | PREDICTED: similar to kinase non-catalytic C-lobe domain (KIND) containing 1                                                                                                                     |
| XP_548533.2 | PREDICTED: similar to G protein-coupled receptor 123                                                                                                                                             |
| XP_548558.2 | PREDICTED: similar to sarco/endoplasmic reticulum Ca <sup>2+</sup> -ATPase isoform a isoform 1                                                                                                   |
| XP_548569.2 | PREDICTED: similar to melanoma antigen family B, 4                                                                                                                                               |
| XP_548593.2 | PREDICTED: similar to polycystin-1L1, partial                                                                                                                                                    |
| XP_548600.2 | PREDICTED: similar to Crm, cramped-like                                                                                                                                                          |
| XP_548677.2 | PREDICTED: similar to obscurin, cytoskeletal calmodulin and titin-interacting RhoGEF                                                                                                             |
| XP_548688.2 | PREDICTED: hypothetical protein XP_548688                                                                                                                                                        |
| XP_548696.2 | PREDICTED: similar to polycystin-1L1                                                                                                                                                             |
| XP_548722.2 | PREDICTED: similar to cytochrome P450, family 2, subfamily W, polypeptide 1                                                                                                                      |
| XP_548725.2 | PREDICTED: similar to Unc4.1 homeobox                                                                                                                                                            |
| XP_548727.2 | PREDICTED: similar to Folate transporter 1 (Solute carrier family 19, member 1) (Placental folate transporter) (FOLT) (Reduced folate carrier protein) (RFC) (Intestinal folate carrier) (IFC-1) |
| XP_548735.2 | PREDICTED: similar to pericentrin 2                                                                                                                                                              |
| XP_548736.2 | PREDICTED: similar to Disco-interacting protein 2 homolog                                                                                                                                        |
| XP_548739.2 | PREDICTED: similar to brain adenylate cyclase 1                                                                                                                                                  |
| XP_548757.2 | PREDICTED: similar to olfactory receptor Olr154                                                                                                                                                  |
| XP_548790.2 | PREDICTED: similar to tripartite motif-containing 41 isform 1 isoform 1                                                                                                                          |
| XP_548794.2 | PREDICTED: similar to Zinc finger protein 62 homolog (Zfp-62) (ZT3)                                                                                                                              |
| XP_548802.2 | PREDICTED: similar to forkhead box K2 isoform 1                                                                                                                                                  |
| XP_548807.2 | PREDICTED: similar to Ig kappa chain V-II region RPMI 6410 precursor                                                                                                                             |
| XP_548813.2 | PREDICTED: similar to USP6 N-terminal like, partial                                                                                                                                              |
| XP_548815.2 | PREDICTED: similar to scavenger receptor cysteine-rich type 1 protein M160 precursor                                                                                                             |
| XP_548825.2 | PREDICTED: similar to Cohesin subunit SA-2 (Stromal antigen 2) (SCC3 homolog 2)                                                                                                                  |
| XP_548841.2 | PREDICTED: similar to adlcan                                                                                                                                                                     |
| XP_548849.2 | PREDICTED: similar to GS2 gene                                                                                                                                                                   |
| XP_548854.2 | PREDICTED: similar to Apical-like protein (APXL protein)                                                                                                                                         |
| XP_548855.2 | PREDICTED: similar to CG12600-PA                                                                                                                                                                 |
| XP_548858.2 | PREDICTED: similar to Rho-GTPase-activating protein 6 (Rho-type GTPase-activating protein RhoGAPX-1)                                                                                             |
| XP_548876.2 | PREDICTED: similar to RalBP1 associated Eps domain containing protein 2 (RalBP1-interacting protein 2) (Partner of RalBP1)                                                                       |
| XP_548877.2 | PREDICTED: similar to Nance-Horan syndrome protein                                                                                                                                               |
| XP_548885.2 | PREDICTED: similar to mitogen-activated protein kinase kinase kinase 5                                                                                                                           |
| XP_548889.2 | PREDICTED: similar to kelch-like 9                                                                                                                                                               |
| XP_548896.2 | PREDICTED: similar to Peroxiredoxin 4 (Prx-IV) (Thioredoxin peroxidase A0372) (Thioredoxin-dependent peroxide reductase A0372) (Antioxidant enzyme AOE372) (AOE37-2)                             |

isoform 1

|             |                                                                                                                                                                                                   |
|-------------|---------------------------------------------------------------------------------------------------------------------------------------------------------------------------------------------------|
| XP_548899.2 | PREDICTED: similar to family with sequence similarity 48, member A isoform b                                                                                                                      |
| XP_548906.1 | PREDICTED: similar to melanoma antigen family B, 18 isoform 1                                                                                                                                     |
| XP_548911.1 | PREDICTED: similar to CG9351-PA, isoform A                                                                                                                                                        |
| XP_548919.2 | PREDICTED: similar to X-linked interleukin-1 receptor accessory protein-like 1 precursor (IL1RAPL-1) (Oligophrenin-4) (Three immunoglobulin domain-containing IL-1 receptor-related 2) (TIGIRR-2) |
| XP_548923.2 | PREDICTED: similar to Nuclear receptor OB1 (Nuclear receptor DAX-1) (DSS-AHC critical region on the X chromosome protein 1)                                                                       |
| XP_548926.1 | PREDICTED: similar to TAK1-binding protein 3 isoform 1 isoform 1                                                                                                                                  |
| XP_548937.2 | PREDICTED: similar to Poly(rC)-binding protein 1 (Alpha-CP1) (hnRNP-E1)                                                                                                                           |
| XP_548954.2 | PREDICTED: similar to Liprin-alpha 3 (Protein tyrosine phosphatase receptor type f polypeptide-interacting protein alpha 3) (PTPRF-interacting protein alpha 3)                                   |
| XP_548956.1 | PREDICTED: similar to nyctalopin                                                                                                                                                                  |
| XP_548969.2 | PREDICTED: similar to zinc finger protein 21 isoform 2                                                                                                                                            |
| XP_548982.2 | PREDICTED: similar to Zinc finger protein 81 (HFZ20) isoform 1                                                                                                                                    |
| XP_548986.2 | PREDICTED: similar to Wiskott-Aldrich syndrome protein (WASp)                                                                                                                                     |
| XP_548989.2 | PREDICTED: similar to proprotein convertase subtilisin/kexin type 1 inhibitor precursor                                                                                                           |
| XP_548991.2 | PREDICTED: similar to GRIP1 associated protein 1 isoform 1 isoform 1                                                                                                                              |
| XP_548992.2 | PREDICTED: similar to transcription factor binding to IGHM enhancer 3 isoform 1                                                                                                                   |
| XP_548995.2 | PREDICTED: similar to coiled-coil domain containing 22                                                                                                                                            |
| XP_548997.2 | PREDICTED: similar to protein phosphatase 1, regulatory (inhibitor) subunit 3F                                                                                                                    |
| XP_549000.2 | PREDICTED: similar to Glyceraldehyde-3-phosphate dehydrogenase (GAPDH)                                                                                                                            |
| XP_549004.2 | PREDICTED: similar to diacylglycerol kinase kappa                                                                                                                                                 |
| XP_549020.2 | PREDICTED: similar to WNK lysine deficient protein kinase 3 isoform 1 isoform 1                                                                                                                   |
| XP_549021.2 | PREDICTED: similar to faciogenital dysplasia protein isoform 1                                                                                                                                    |
| XP_549032.2 | PREDICTED: similar to Zinc finger X-linked protein ZXDB                                                                                                                                           |
| XP_549041.2 | PREDICTED: similar to zinc finger CCCH type containing 12A                                                                                                                                        |
| XP_549046.2 | PREDICTED: similar to hephaestin isoform a                                                                                                                                                        |
| XP_549052.2 | PREDICTED: similar to StAR-related lipid transfer protein 8 (StARD8) (START domain-containing protein 8)                                                                                          |
| XP_549068.2 | PREDICTED: similar to Zinc finger protein 261 (DXS6673E protein) isoform 4                                                                                                                        |
| XP_549070.2 | PREDICTED: similar to TBP-associated factor 1 isoform 1 isoform 1                                                                                                                                 |
| XP_549071.2 | PREDICTED: similar to ACRC protein                                                                                                                                                                |
| XP_549080.1 | PREDICTED: similar to Homeobox protein CDX-4 (Caudal-type homeobox protein 4)                                                                                                                     |
| XP_549084.2 | PREDICTED: similar to Monocarboxylate transporter 8 (MCT 8) (X-linked PEST-containing transporter) (MCT 7)                                                                                        |
| XP_549086.2 | PREDICTED: similar to DNA polymerase zeta catalytic subunit (Seizure-related protein 4)                                                                                                           |
| XP_549095.2 | PREDICTED: similar to implantation-associated protein isoform 1                                                                                                                                   |
| XP_549104.2 | PREDICTED: similar to bromo domain-containing protein disrupted in leukemia                                                                                                                       |
| XP_549107.2 | PREDICTED: similar to NipSnap1 protein                                                                                                                                                            |

|             |                                                                                                                                                                       |
|-------------|-----------------------------------------------------------------------------------------------------------------------------------------------------------------------|
| XP_549109.2 | PREDICTED: similar to Ribosomal protein S6 kinase alpha 6 (S6K-alpha 6) (90 kDa ribosomal protein S6 kinase 6) (p90-RSK 6) (Ribosomal S6 kinase 4) (RSK-4) (pp90RSK4) |
| XP_549110.2 | PREDICTED: hypothetical protein XP_549110                                                                                                                             |
| XP_549133.1 | PREDICTED: similar to Protocadherin 19 precursor                                                                                                                      |
| XP_549135.2 | PREDICTED: similar to cleavage stimulation factor subunit 2 isoform 2                                                                                                 |
| XP_549138.2 | PREDICTED: similar to follicle-stimulating hormone primary response protein 1                                                                                         |
| XP_549142.1 | PREDICTED: similar to ALEX3 protein                                                                                                                                   |
| XP_549144.2 | PREDICTED: similar to nuclear RNA export factor 2                                                                                                                     |
| XP_549158.2 | PREDICTED: similar to testis-specific histone 2b                                                                                                                      |
| XP_549179.2 | PREDICTED: similar to insulin receptor substrate 4                                                                                                                    |
| XP_549183.2 | PREDICTED: similar to AMME syndrome candidate gene 1 protein isoform 1                                                                                                |
| XP_549188.2 | PREDICTED: similar to calpain 6                                                                                                                                       |
| XP_549191.2 | PREDICTED: similar to Ovarian tumor locus protein                                                                                                                     |
| XP_549199.2 | PREDICTED: similar to leucine-rich repeats and calponin homology (CH) domain containing 2 isoform 1                                                                   |
| XP_549213.2 | PREDICTED: similar to K06A9.1b                                                                                                                                        |
| XP_549232.2 | PREDICTED: similar to stromal antigen 2 isoform 2                                                                                                                     |
| XP_549249.2 | PREDICTED: similar to UTP14, U3 small nucleolar ribonucleoprotein, homolog A                                                                                          |
| XP_549256.2 | PREDICTED: similar to RNA binding motif protein, X-linked 2                                                                                                           |
| XP_549261.2 | PREDICTED: similar to serine/threonine protein kinase MASK                                                                                                            |
| XP_549262.2 | PREDICTED: similar to FERM, RhoGEF and pleckstrin domain protein 2                                                                                                    |
| XP_549296.2 | PREDICTED: similar to Proto-oncogene DBL (Proto-oncogene MCF-2)                                                                                                       |
| XP_549321.2 | PREDICTED: similar to heat shock transcription factor, Y-linked 1 (predicted)                                                                                         |
| XP_549330.2 | PREDICTED: similar to CG1 protein (F18)                                                                                                                               |
| XP_549331.2 | PREDICTED: similar to myotubularin-related protein 1 isoform 1                                                                                                        |
| XP_549333.2 | PREDICTED: similar to Melatonin-related receptor (H9)                                                                                                                 |
| XP_549342.2 | PREDICTED: similar to melanoma antigen family A, 10                                                                                                                   |
| XP_549349.2 | PREDICTED: similar to paraneoplastic antigen MA3                                                                                                                      |
| XP_549360.2 | PREDICTED: similar to Dual specificity protein phosphatase 9 (Mitogen-activated protein kinase phosphatase 4) (MAP kinase phosphatase 4) (MKP-4)                      |
| XP_549363.2 | PREDICTED: similar to plexin B3                                                                                                                                       |
| XP_549364.2 | PREDICTED: similar to Neural cell adhesion molecule L1 precursor (N-CAM L1) (CD171 antigen)                                                                           |
| XP_549366.2 | PREDICTED: similar to Host cell factor (HCF) (HCF-1) (C1 factor) (VP16 accessory protein) (VCAF) (CFF) isoform 1                                                      |
| XP_549367.2 | PREDICTED: similar to interleukin-1 receptor-associated kinase 1 isoform 1                                                                                            |
| XP_549371.2 | PREDICTED: similar to Plexin A3 precursor (Plexin 4) (Transmembrane protein sex)                                                                                      |
| XP_549381.2 | PREDICTED: similar to Gab3 protein                                                                                                                                    |
| XP_549391.1 | PREDICTED: similar to Sprouty homolog 3 (Spry-3)                                                                                                                      |
| XP_549435.2 | PREDICTED: hypothetical protein XP_549435                                                                                                                             |
| XP_549531.2 | PREDICTED: similar to arginine/serine-rich coiled-coil 1                                                                                                              |

|             |                                                                                                                                                                 |
|-------------|-----------------------------------------------------------------------------------------------------------------------------------------------------------------|
| XP_549577.2 | PREDICTED: hypothetical protein XP_549577                                                                                                                       |
| XP_549617.1 | PREDICTED: hypothetical protein XP_549617                                                                                                                       |
| XP_549677.1 | PREDICTED: hypothetical protein XP_549677                                                                                                                       |
| XP_549775.2 | PREDICTED: hypothetical protein XP_549775                                                                                                                       |
| XP_549800.2 | PREDICTED: hypothetical protein XP_549800                                                                                                                       |
| XP_848220.1 | PREDICTED: similar to SH2 domain containing 4A isoform 2                                                                                                        |
| XP_848228.1 | PREDICTED: similar to euchromatic histone methyltransferase 1 isoform 2                                                                                         |
| XP_848232.1 | PREDICTED: similar to Protein arginine N-methyltransferase 2, partial                                                                                           |
| XP_848238.1 | PREDICTED: similar to Protein disulfide-isomerase A4 precursor (Protein ERp-72) (ERp72) isoform 3                                                               |
| XP_848255.1 | PREDICTED: similar to Thioredoxin domain containing protein 4 precursor (Endoplasmic reticulum resident protein ERp44), partial                                 |
| XP_848258.1 | PREDICTED: similar to zinc finger protein 406 isoform ZFAT-1 isoform 5                                                                                          |
| XP_848271.1 | PREDICTED: similar to SH3 and multiple ankyrin repeat domains 3 (Shank3) (Proline-rich synapse associated protein 2) (ProSAP2) (SPANK-2)                        |
| XP_848278.1 | PREDICTED: similar to Potassium-transporting ATPase alpha chain 2 (Proton pump) (Non-gastric H(+)/K(+) ATPase alpha subunit)                                    |
| XP_848282.1 | PREDICTED: similar to CG11638-PA                                                                                                                                |
| XP_848283.1 | PREDICTED: similar to Aminopeptidase O (AP-O) isoform 2                                                                                                         |
| XP_848290.1 | PREDICTED: similar to chromosome 9 open reading frame 36                                                                                                        |
| XP_848303.1 | PREDICTED: similar to T-complex protein 1, epsilon subunit (TCP-1-epsilon) (CCT-epsilon) isoform 1                                                              |
| XP_848306.1 | PREDICTED: similar to fructose-1,6-bisphosphatase 1 isoform 3                                                                                                   |
| XP_848309.1 | PREDICTED: similar to BTG3 protein (Tob5 protein) (Abundant in neuroepithelium area protein) isoform 3                                                          |
| XP_848312.1 | PREDICTED: similar to adaptor-related protein complex 2, mu 1 subunit isoform 2                                                                                 |
| XP_848314.1 | PREDICTED: similar to cofactor of BRCA1 isoform 2                                                                                                               |
| XP_848320.1 | PREDICTED: similar to interferon-induced protein with tetratricopeptide repeats 3                                                                               |
| XP_848329.1 | PREDICTED: similar to testis-specific LRR protein                                                                                                               |
| XP_848333.1 | PREDICTED: similar to eukaryotic translation elongation factor 1 alpha 2 isoform 1                                                                              |
| XP_848340.1 | PREDICTED: similar to Glyceraldehyde-3-phosphate dehydrogenase, liver (GAPDH)                                                                                   |
| XP_848346.1 | PREDICTED: hypothetical protein XP_843253                                                                                                                       |
| XP_848353.1 | PREDICTED: similar to Signal transducer and activator of transcription 1-alpha/beta (Transcription factor ISGF-3 components p91/p84) isoform 2                  |
| XP_848355.1 | PREDICTED: similar to T-complex protein 1, zeta subunit (TCP-1-zeta) (CCT-zeta) (CCT-zeta-1) isoform 1                                                          |
| XP_848357.1 | PREDICTED: similar to X-linked neuroligin 4 isoform 1                                                                                                           |
| XP_848369.1 | PREDICTED: similar to esterase D/formylglutathione hydrolase isoform 1                                                                                          |
| XP_848372.1 | PREDICTED: similar to Protein C14orf119                                                                                                                         |
| XP_848373.1 | PREDICTED: similar to Placental thrombin inhibitor (Cytoplasmic antiproteinase) (CAP) (Protease inhibitor 6) (PI-6) (Serpin B6) isoform 2                       |
| XP_848378.1 | PREDICTED: similar to Glial fibrillary acidic protein, astrocyte (GFAP) isoform 2                                                                               |
| XP_848384.1 | PREDICTED: similar to Liprin-alpha 4 (Protein tyrosine phosphatase receptor type f polypeptide-interacting protein alpha 4) (PTPRF-interacting protein alpha 4) |
| XP_848389.1 | PREDICTED: similar to Glycerol-3-phosphate dehydrogenase, mitochondrial precursor (GPD-M) (GPDH-M) (mtGPD) isoform 2                                            |
| XP_848393.1 | PREDICTED: similar to a disintegrin and metalloproteinase with thrombospondin motifs 9 preproprotein                                                            |

|             |                                                                                                                                                                                                                    |
|-------------|--------------------------------------------------------------------------------------------------------------------------------------------------------------------------------------------------------------------|
| XP_848398.1 | PREDICTED: similar to LINE-1 reverse transcriptase homolog                                                                                                                                                         |
| XP_848407.1 | PREDICTED: similar to eukaryotic translation elongation factor 1 alpha 2 isoform 2                                                                                                                                 |
| XP_848421.1 | PREDICTED: similar to solute carrier family 7, member 2 isoform 1 isoform 3                                                                                                                                        |
| XP_848427.1 | PREDICTED: similar to K11G12.6                                                                                                                                                                                     |
| XP_848447.1 | PREDICTED: hypothetical protein XP_843354                                                                                                                                                                          |
| XP_848449.1 | PREDICTED: similar to smoothelin, like                                                                                                                                                                             |
| XP_848450.1 | PREDICTED: similar to Nuclear protein 1 (Protein p8) (Candidate of metastasis 1)                                                                                                                                   |
| XP_848466.1 | PREDICTED: similar to Centaurin gamma 2 (ARF-GAP with GTP-binding protein-like, ankyrin repeat and pleckstrin homology domains 1) (AGAP1)                                                                          |
| XP_848470.1 | PREDICTED: similar to UDP-N-acetylglucosamine: alpha-1,3-D-mannoside beta-1,4-N-acetylglucosaminyltransferase IV                                                                                                   |
| XP_848473.1 | PREDICTED: similar to neuregulin 2 isoform 3 isoform 2                                                                                                                                                             |
| XP_848479.1 | PREDICTED: similar to 60 kDa heat shock protein, mitochondrial precursor (Hsp60) (60 kDa chaperonin) (CPN60) (Heat shock protein 60) (HSP-60) (Mitochondrial matrix protein P1) (P60 lymphocyte protein) (HuCHA60) |
| XP_848482.1 | PREDICTED: similar to Gamma-aminobutyric-acid receptor beta-3 subunit precursor (GABA(A) receptor)                                                                                                                 |
| XP_848486.1 | PREDICTED: similar to Ig heavy chain V-III region VH26 precursor                                                                                                                                                   |
| XP_848492.1 | PREDICTED: similar to adrenomedullin 2 precursor                                                                                                                                                                   |
| XP_848501.1 | PREDICTED: similar to Ig heavy chain V-III region VH26 precursor                                                                                                                                                   |
| XP_848502.1 | PREDICTED: similar to bromodomain containing protein 1 isoform 6                                                                                                                                                   |
| XP_848504.1 | PREDICTED: similar to steroid dehydrogenase homolog isoform 2                                                                                                                                                      |
| XP_848507.1 | PREDICTED: similar to FAT tumor suppressor homolog 3 isoform 9                                                                                                                                                     |
| XP_848519.1 | PREDICTED: similar to Voltage-dependent anion-selective channel protein 3 (VDAC-3) (mVDAC3) (Outer mitochondrial membrane protein porin 3) isoform 1                                                               |
| XP_848524.1 | PREDICTED: similar to peptidase (prosome, macropain) 26S subunit, ATPase 1 isoform 2                                                                                                                               |
| XP_848525.1 | PREDICTED: similar to plakophilin 4 isoform a isoform 2                                                                                                                                                            |
| XP_848535.1 | PREDICTED: similar to Zinc finger protein Rlf (Rearranged L-myc fusion gene protein) (Zn-15 related protein) isoform 2                                                                                             |
| XP_848538.1 | PREDICTED: similar to Zinc finger and BTB domain containing protein 20 (Zinc finger protein 288) (Dendritic-derived BTB/POZ zinc finger protein) isoform 2                                                         |
| XP_848542.1 | PREDICTED: similar to tensin-like SH2 domain containing 1                                                                                                                                                          |
| XP_848544.1 | PREDICTED: similar to a disintegrin and metalloprotease domain 11 isoform 1 preproprotein                                                                                                                          |
| XP_848545.1 | PREDICTED: similar to CG11136-PA                                                                                                                                                                                   |
| XP_848553.1 | PREDICTED: similar to cyclin L2 isoform 1 isoform 3                                                                                                                                                                |
| XP_848555.1 | PREDICTED: similar to ATP binding cassette, sub-family A (ABC1), member 13                                                                                                                                         |
| XP_848569.1 | PREDICTED: similar to Beta-arrestin 2 (Arrestin, beta 2) isoform 2                                                                                                                                                 |
| XP_848570.1 | PREDICTED: similar to leprecan 1                                                                                                                                                                                   |
| XP_848572.1 | PREDICTED: similar to dynein, axonemal, heavy polypeptide 5                                                                                                                                                        |
| XP_848574.1 | PREDICTED: similar to protein tyrosine phosphatase, non-receptor type substrate 1 precursor, partial                                                                                                               |
| XP_848580.1 | PREDICTED: similar to iroquois homeobox protein 2 isoform 5                                                                                                                                                        |
| XP_848581.1 | PREDICTED: similar to neuron navigator 1 isoform 2                                                                                                                                                                 |
| XP_848588.1 | PREDICTED: similar to potassium channel tetramerisation domain containing 7                                                                                                                                        |

|             |                                                                                                                                                                                                                           |
|-------------|---------------------------------------------------------------------------------------------------------------------------------------------------------------------------------------------------------------------------|
| XP_848594.1 | PREDICTED: similar to ADP-ribosyltransferase 3 isoform 2                                                                                                                                                                  |
| XP_848603.1 | PREDICTED: similar to PX domain containing serine/threonine kinase isoform 2                                                                                                                                              |
| XP_848605.1 | PREDICTED: similar to Guanine nucleotide-binding protein G(z), alpha subunit (G(x) alpha chain) (Gz-alpha)                                                                                                                |
| XP_848619.1 | PREDICTED: similar to solute carrier family 41, member 3 isoform 4 isoform 1                                                                                                                                              |
| XP_848621.1 | PREDICTED: similar to calpastatin isoform a isoform 3                                                                                                                                                                     |
| XP_848623.1 | PREDICTED: similar to non-POU domain containing, octamer-binding                                                                                                                                                          |
| XP_848626.1 | PREDICTED: similar to tubulin, alpha 1 isoform 1                                                                                                                                                                          |
| XP_848630.1 | PREDICTED: similar to colon carcinoma related protein                                                                                                                                                                     |
| XP_848631.1 | PREDICTED: hypothetical protein XP_843538                                                                                                                                                                                 |
| XP_848633.1 | PREDICTED: similar to LINE-1 reverse transcriptase homolog                                                                                                                                                                |
| XP_848634.1 | PREDICTED: similar to F11C1.5a isoform 3                                                                                                                                                                                  |
| XP_848650.1 | PREDICTED: similar to PDZ domain containing 6 isoform 2                                                                                                                                                                   |
| XP_848654.1 | PREDICTED: similar to breakpoint cluster region isoform 1 isoform 1                                                                                                                                                       |
| XP_848662.1 | PREDICTED: similar to Glyceraldehyde-3-phosphate dehydrogenase (GAPDH)                                                                                                                                                    |
| XP_848665.1 | PREDICTED: similar to transforming, acidic coiled-coil containing protein 1 isoform 2                                                                                                                                     |
| XP_848666.1 | PREDICTED: similar to Aspartyl-tRNA synthetase (Aspartate--tRNA ligase) (AsPRS) isoform 2                                                                                                                                 |
| XP_848682.1 | PREDICTED: similar to glycylpeptide N-tetradecanoyltransferase 2 isoform 2                                                                                                                                                |
| XP_848683.1 | PREDICTED: similar to Metabotropic glutamate receptor 5 precursor (mGluR5) isoform 2                                                                                                                                      |
| XP_848684.1 | PREDICTED: similar to zinc finger protein 445 isoform 1                                                                                                                                                                   |
| XP_848685.1 | PREDICTED: similar to Voltage-dependent L-type calcium channel alpha-1S subunit (Voltage-gated calcium channel alpha subunit Cav1.1) (Calcium channel, L type, alpha-1 polypeptide, isoform 3, skeletal muscle) isoform 2 |
| XP_848689.1 | PREDICTED: similar to 3-hydroxyisobutyryl-Coenzyme A hydrolase isoform 1                                                                                                                                                  |
| XP_848701.1 | PREDICTED: similar to abhydrolase domain containing 4 isoform 1                                                                                                                                                           |
| XP_848707.1 | PREDICTED: similar to myosin, heavy polypeptide 7, cardiac muscle, beta                                                                                                                                                   |
| XP_848715.1 | PREDICTED: similar to eukaryotic translation elongation factor 1 alpha 1 isoform 2                                                                                                                                        |
| XP_848716.1 | PREDICTED: similar to AT rich interactive domain 4B isoform 1 isoform 3                                                                                                                                                   |
| XP_848719.1 | PREDICTED: similar to paired related homeobox protein-like 1                                                                                                                                                              |
| XP_848728.1 | PREDICTED: similar to CG12360-PA, isoform A                                                                                                                                                                               |
| XP_848731.1 | PREDICTED: similar to transmembrane protein 18                                                                                                                                                                            |
| XP_848750.1 | PREDICTED: similar to musculoskeletal, embryonic nuclear protein 1                                                                                                                                                        |
| XP_848757.1 | PREDICTED: similar to matrix metalloproteinase 14 preproprotein isoform 1                                                                                                                                                 |
| XP_848761.1 | PREDICTED: similar to ribosomal protein L10                                                                                                                                                                               |
| XP_848762.1 | PREDICTED: similar to glyceraldehyde-3-phosphate dehydrogenase                                                                                                                                                            |
| XP_848767.1 | PREDICTED: similar to Neuronal cell adhesion molecule precursor (Nr-CAM) (NgCAM-related cell adhesion molecule) (Ng-CAM-related) (rBravo) (Ankyrin binding cell adhesion molecule NrCAM) isoform 2                        |
| XP_848770.1 | PREDICTED: similar to malic enzyme 3, NADP(+)-dependent, mitochondrial isoform 2                                                                                                                                          |



|             |                                                                                                                                                                                                                                                                                                                                                                            |
|-------------|----------------------------------------------------------------------------------------------------------------------------------------------------------------------------------------------------------------------------------------------------------------------------------------------------------------------------------------------------------------------------|
| XP_848773.1 | PREDICTED: similar to chromodomain protein, Y chromosome-like isoform a isoform 2                                                                                                                                                                                                                                                                                          |
| XP_848776.1 | PREDICTED: similar to integrin, alpha D precursor                                                                                                                                                                                                                                                                                                                          |
| XP_848777.1 | PREDICTED: similar to Heterogeneous nuclear ribonucleoprotein H (hnRNP H) isoform 3                                                                                                                                                                                                                                                                                        |
| XP_848782.1 | PREDICTED: similar to synaptonemal complex protein 1 isoform 1                                                                                                                                                                                                                                                                                                             |
| XP_848783.1 | PREDICTED: similar to heat shock protein 1, alpha isoform 1                                                                                                                                                                                                                                                                                                                |
| XP_848791.1 | PREDICTED: similar to USP6 N-terminal like protein (Related to the N terminus of tre) (RN-tre)                                                                                                                                                                                                                                                                             |
| XP_848795.1 | PREDICTED: similar to von Willebrand factor A domain-related protein isoform 1                                                                                                                                                                                                                                                                                             |
| XP_848807.1 | PREDICTED: similar to 60S ribosomal protein L6 (TAX-responsive enhancer element binding protein 107) (TAXREB107) (Neoplasm-related protein C140)<br>PREDICTED: similar to Mitogen-activated protein kinase kinase kinase 12 (Mixed lineage kinase) (Leucine-zipper protein kinase) (ZPK) (Dual leucine zipper bearing kinase) (DLK) (MAPK-upstream kinase) (MUK) isoform 2 |
| XP_848815.1 |                                                                                                                                                                                                                                                                                                                                                                            |
| XP_848821.1 | PREDICTED: similar to sal-like protein 3                                                                                                                                                                                                                                                                                                                                   |
| XP_848826.1 | PREDICTED: similar to Synaptotagmin-2 (Synaptotagmin II) (SytlI)                                                                                                                                                                                                                                                                                                           |
| XP_848830.1 | PREDICTED: similar to Dolichyl-diphosphooligosaccharide--protein glycosyltransferase 67 kDa subunit precursor (Ribophorin I) (RPN-I) isoform 3                                                                                                                                                                                                                             |
| XP_848838.1 | PREDICTED: similar to acyl-CoA synthetase long-chain family member 1 isoform 2                                                                                                                                                                                                                                                                                             |
| XP_848839.1 | PREDICTED: similar to Myosin regulatory light chain 2, nonsarcomeric (Myosin RLC) isoform 1                                                                                                                                                                                                                                                                                |
| XP_848856.1 | PREDICTED: similar to keratin 8                                                                                                                                                                                                                                                                                                                                            |
| XP_848857.1 | PREDICTED: similar to Receptor activity-modifying protein 1 precursor                                                                                                                                                                                                                                                                                                      |
| XP_848859.1 | PREDICTED: similar to developmental pluripotency associated 2                                                                                                                                                                                                                                                                                                              |
| XP_848866.1 | PREDICTED: similar to Microtubule associated serine/threonine-protein kinase-like isoform 1                                                                                                                                                                                                                                                                                |
| XP_848871.1 | PREDICTED: similar to protocadherin alpha 1 isoform 2 precursor                                                                                                                                                                                                                                                                                                            |
| XP_848873.1 | PREDICTED: similar to Protein KIAA0286                                                                                                                                                                                                                                                                                                                                     |
| XP_848876.1 | PREDICTED: hypothetical protein XP_843783                                                                                                                                                                                                                                                                                                                                  |
| XP_848878.1 | PREDICTED: similar to Set1/Ash2 histone methyltransferase complex subunit ASH2 (ASH2-like protein) isoform 2                                                                                                                                                                                                                                                               |
| XP_848881.1 | PREDICTED: similar to amyloid beta precursor protein-binding, family B, member 3 isoform d isoform 1                                                                                                                                                                                                                                                                       |
| XP_848888.1 | PREDICTED: similar to protocadherin alpha 3 isoform 2 precursor                                                                                                                                                                                                                                                                                                            |
| XP_848894.1 | PREDICTED: similar to BMP-2 inducible protein kinase (BIKe) isoform 1                                                                                                                                                                                                                                                                                                      |
| XP_848898.1 | PREDICTED: similar to mu-protocadherin                                                                                                                                                                                                                                                                                                                                     |
| XP_848906.1 | PREDICTED: similar to PDZ and LIM domain 1 (elfin)                                                                                                                                                                                                                                                                                                                         |
| XP_848910.1 | PREDICTED: similar to unactive progesterone receptor, 23 kD                                                                                                                                                                                                                                                                                                                |
| XP_848920.1 | PREDICTED: similar to DnaJ-like protein 2                                                                                                                                                                                                                                                                                                                                  |
| XP_848921.1 | PREDICTED: similar to L-lactate dehydrogenase B chain (LDH-B) (LDH heart subunit) (LDH-H) isoform 2<br>PREDICTED: similar to Potassium voltage-gated channel subfamily H member 1 (Voltage-gated potassium channel subunit Kv10.1) (Ether-a-go-go potassium channel 1) (hEAG1) (h-eag) isoform 2                                                                           |
| XP_848926.1 |                                                                                                                                                                                                                                                                                                                                                                            |
| XP_848931.1 | PREDICTED: similar to protocadherin alpha 6 isoform 2 precursor                                                                                                                                                                                                                                                                                                            |
| XP_848942.1 | PREDICTED: similar to CG18549-PA isoform 2                                                                                                                                                                                                                                                                                                                                 |
| XP_848945.1 | PREDICTED: similar to protocadherin alpha 9 isoform 2 precursor                                                                                                                                                                                                                                                                                                            |

|             |                                                                                                                                                                                        |
|-------------|----------------------------------------------------------------------------------------------------------------------------------------------------------------------------------------|
| XP_848946.1 | PREDICTED: similar to GalNAc transferase 10 isoform a                                                                                                                                  |
| XP_848949.1 | PREDICTED: similar to SPFH domain protein 2 precursor isoform 4                                                                                                                        |
| XP_848952.1 | PREDICTED: hypothetical protein XP_843859                                                                                                                                              |
| XP_848953.1 | PREDICTED: similar to obscurin, cytoskeletal calmodulin and titin-interacting RhoGEF                                                                                                   |
| XP_848955.1 | PREDICTED: similar to protocadherin alpha 10 isoform 2 precursor                                                                                                                       |
| XP_848961.1 | PREDICTED: similar to Tyrosine-protein kinase JAK1 (Janus kinase 1) (JAK-1)                                                                                                            |
| XP_848970.1 | PREDICTED: similar to Phosphorylase b kinase gamma catalytic chain, testis/liver isoform (PHK-gamma-T) (Phosphorylase kinase gamma subunit 2) (PSK-C3) isoform 1                       |
| XP_848974.1 | PREDICTED: similar to 40S ribosomal protein S6                                                                                                                                         |
| XP_848985.1 | PREDICTED: similar to laminin receptor 1 (ribosomal protein SA) isoform 1                                                                                                              |
| XP_848986.1 | PREDICTED: similar to eukaryotic translation elongation factor 1 alpha 2 isoform 2                                                                                                     |
| XP_848990.1 | PREDICTED: similar to ubiquitin associated domain containing 1 isoform 2                                                                                                               |
| XP_848994.1 | PREDICTED: similar to protocadherin alpha 11 isoform 2 precursor                                                                                                                       |
| XP_848996.1 | PREDICTED: similar to C10C5.4                                                                                                                                                          |
| XP_848999.1 | PREDICTED: similar to CG40351-PA.3                                                                                                                                                     |
| XP_849000.1 | PREDICTED: similar to Endothelin B receptor-like protein-2 precursor (ETBR-LP-2) (G-protein coupled receptor 37 like 1)                                                                |
| XP_849003.1 | PREDICTED: similar to family with sequence similarity 40, member B isoform 2                                                                                                           |
| XP_849010.1 | PREDICTED: similar to Apoptotic chromatin condensation inducer in the nucleus (Acinus) isoform 2                                                                                       |
| XP_849020.1 | PREDICTED: hypothetical protein XP_843927                                                                                                                                              |
| XP_849028.1 | PREDICTED: similar to eukaryotic translation initiation factor 5A isoform 2                                                                                                            |
| XP_849034.1 | PREDICTED: similar to forkhead box O6                                                                                                                                                  |
| XP_849036.1 | PREDICTED: similar to Protocadherin alpha 13 precursor (PCDH-alpha13)                                                                                                                  |
| XP_849039.1 | PREDICTED: hypothetical protein XP_843946                                                                                                                                              |
| XP_849043.1 | PREDICTED: similar to Bromodomain adjacent to zinc finger domain 2A (Transcription termination factor-I interacting protein 5) (TTF-I interacting protein 5) (Tip5) (hWALp3) isoform 2 |
| XP_849047.1 | PREDICTED: similar to ADP-ribosylation factor 4 isoform 2                                                                                                                              |
| XP_849053.1 | PREDICTED: hypothetical protein XP_843960                                                                                                                                              |
| XP_849054.1 | PREDICTED: similar to kazrin isoform A                                                                                                                                                 |
| XP_849071.1 | PREDICTED: similar to Collagen alpha 2(IV) chain precursor                                                                                                                             |
| XP_849075.1 | PREDICTED: similar to DCC-interacting protein 13 alpha (Dip13 alpha) (Adapter protein containing PH domain, PTB domain and leucine zipper motif 1) isoform 2                           |
| XP_849081.1 | PREDICTED: similar to brain adenylate cyclase 1                                                                                                                                        |
| XP_849082.1 | PREDICTED: similar to Homeobox protein Nkx-2.4 (Homeobox protein NKX2.4) (Homeobox protein NK-2 homolog D)                                                                             |
| XP_849090.1 | PREDICTED: similar to Leucine-rich repeat transmembrane protein FLRT3 precursor (Fibronectin-like domain-containing leucine-rich transmembrane protein 3) isoform 2                    |
| XP_849095.1 | PREDICTED: similar to family with sequence similarity 3, member D                                                                                                                      |
| XP_849098.1 | PREDICTED: hypothetical protein XP_844005                                                                                                                                              |
| XP_849102.1 | PREDICTED: similar to inhibitor of CDK interacting with cyclin A1                                                                                                                      |
| XP_849104.1 | PREDICTED: similar to Formin-binding protein 3 (Huntingtin yeast partner A) (Huntingtin-interacting protein HYPA/FBP11) (Fas-ligand associated factor 1) (NY-REN-6 antigen)            |

isoform 2

|             |                                                                                                                                                                                                               |
|-------------|---------------------------------------------------------------------------------------------------------------------------------------------------------------------------------------------------------------|
| XP_849116.1 | PREDICTED: similar to Wilms tumour 1-associating protein                                                                                                                                                      |
| XP_849117.1 | PREDICTED: hypothetical protein XP_844024                                                                                                                                                                     |
| XP_849128.1 | PREDICTED: similar to neurexophilin 4                                                                                                                                                                         |
| XP_849131.1 | PREDICTED: similar to beta-galactosidase-like protein                                                                                                                                                         |
| XP_849132.1 | PREDICTED: similar to profilin 1                                                                                                                                                                              |
| XP_849138.1 | PREDICTED: similar to Transportin 3 (Transportin-SR) (TRN-SR) (Importin 12) isoform 3                                                                                                                         |
| XP_849178.1 | PREDICTED: similar to neuregulin 1 isoform HRG-beta1 isoform 2                                                                                                                                                |
| XP_849179.1 | PREDICTED: similar to cAMP-dependent protein kinase type II-beta regulatory subunit isoform 3                                                                                                                 |
| XP_849192.1 | PREDICTED: similar to regucalcin gene promotor region related protein                                                                                                                                         |
| XP_849196.1 | PREDICTED: similar to retinoblastoma-associated protein 140 isoform 2                                                                                                                                         |
| XP_849200.1 | PREDICTED: similar to CDP-diacylglycerol--inositol 3-phosphatidyltransferase (phosphatidylinositol synthase) isoform 2                                                                                        |
| XP_849212.1 | PREDICTED: similar to ABT1-associated protein isoform 2                                                                                                                                                       |
| XP_849213.1 | PREDICTED: similar to neurobeachin isoform 2                                                                                                                                                                  |
| XP_849214.1 | PREDICTED: similar to cytoplasmic polyadenylation element binding protein 3 isoform 2                                                                                                                         |
| XP_849215.1 | PREDICTED: similar to NIF3-like protein 1 (Amyotrophic lateral sclerosis 2 chromosomal region candidate gene protein 1) isoform 1                                                                             |
| XP_849222.1 | PREDICTED: similar to ribosomal protein L10a                                                                                                                                                                  |
| XP_849224.1 | PREDICTED: similar to eukaryotic translation elongation factor 1 alpha 1                                                                                                                                      |
| XP_849228.1 | PREDICTED: similar to H3 histone, family 3B                                                                                                                                                                   |
| XP_849232.1 | PREDICTED: similar to cytomatrix protein p110 isoform 2                                                                                                                                                       |
| XP_849235.1 | PREDICTED: similar to potassium voltage-gated channel, shaker-related subfamily, beta member 2 isoform 2 isoform 2                                                                                            |
| XP_849236.1 | PREDICTED: similar to protein tyrosine phosphatase, non-receptor type 14 isoform 1                                                                                                                            |
| XP_849237.1 | PREDICTED: similar to tubulin, alpha 1                                                                                                                                                                        |
| XP_849239.1 | PREDICTED: similar to SRY (sex determining region Y)-box 1                                                                                                                                                    |
| XP_849241.1 | PREDICTED: similar to Proteasome subunit beta type 6 precursor (Proteasome delta chain) (Macropain delta chain) (Multicatalytic endopeptidase complex delta chain) (Proteasome subunit Y)                     |
| XP_849244.1 | PREDICTED: similar to serine hydroxymethyltransferase 2 (mitochondrial) isoform 2                                                                                                                             |
| XP_849255.1 | PREDICTED: similar to Heterogeneous nuclear ribonucleoprotein A1 (Helix-destabilizing protein) (Single-strand binding protein) (hnRNP core protein A1) (HDP-1) (Topoisomerase-inhibitor suppressed) isoform 1 |
| XP_849264.1 | PREDICTED: similar to Regulating synaptic membrane exocytosis protein 3 (Nim3) (Rab-3 interacting molecule 3) (RIM 3) (RIM3 gamma)                                                                            |
| XP_849268.1 | PREDICTED: similar to thrombopoietin isoform 2 precursor                                                                                                                                                      |
| XP_849269.1 | PREDICTED: similar to Ig heavy chain V-III region VH26 precursor                                                                                                                                              |
| XP_849271.1 | PREDICTED: similar to caspase recruitment domain protein 9                                                                                                                                                    |
| XP_849279.1 | PREDICTED: similar to Growth-arrest-specific protein 1 precursor (GAS-1)                                                                                                                                      |
| XP_849282.1 | PREDICTED: similar to gamma-aminobutyric acid (GABA-B) receptor binding protein                                                                                                                               |
| XP_849291.1 | PREDICTED: similar to Intersectin 2 (SH3 domain-containing protein 1B) (SH3P18) (SH3P18-like WASP associated protein) isoform 2                                                                               |

|             |                                                                                                                                                                                            |
|-------------|--------------------------------------------------------------------------------------------------------------------------------------------------------------------------------------------|
| XP_849292.1 | PREDICTED: similar to Protein kinase C, theta type (nPKC-theta) isoform 2                                                                                                                  |
| XP_849294.1 | PREDICTED: similar to phosphatidylinositol transfer protein, membrane-associated 2 isoform 2                                                                                               |
| XP_849295.1 | PREDICTED: similar to calcipressin 1 isoform a isoform 1                                                                                                                                   |
| XP_849301.1 | PREDICTED: similar to tubulin, alpha 1                                                                                                                                                     |
| XP_849302.1 | PREDICTED: similar to glyceraldehyde-3-phosphate dehydrogenase                                                                                                                             |
| XP_849304.1 | PREDICTED: similar to Small inducible cytokine B16 precursor (Transmembrane chemokine CXCL16) (SR-PSOX) (Scavenger receptor for phosphatidylserine and oxidized low density lipoprotein)   |
| XP_849315.1 | PREDICTED: similar to tubulin, alpha 1                                                                                                                                                     |
| XP_849323.1 | PREDICTED: similar to thyrotroph embryonic factor isoform 2 isoform 1                                                                                                                      |
| XP_849326.1 | PREDICTED: similar to SEC15-like 1 isoform b isoform 2                                                                                                                                     |
| XP_849343.1 | PREDICTED: similar to insulin-like growth factor binding protein 6 isoform 2                                                                                                               |
| XP_849350.1 | PREDICTED: similar to Ig lambda chain C regions                                                                                                                                            |
| XP_849353.1 | PREDICTED: similar to tubulin, beta 5                                                                                                                                                      |
| XP_849356.1 | PREDICTED: similar to IP63 protein isoform 1                                                                                                                                               |
| XP_849357.1 | PREDICTED: similar to ATPase, aminophospholipid transporter (APLT), class I, type 8A, member 1 isoform 1                                                                                   |
| XP_849359.1 | PREDICTED: similar to START domain containing 13 isoform gamma isoform 3                                                                                                                   |
| XP_849365.1 | PREDICTED: similar to heat shock protein 8                                                                                                                                                 |
| XP_849367.1 | PREDICTED: similar to Immunoglobulin lambda-like polypeptide 1 precursor (Immunoglobulin-related 14.1 protein) (Immunoglobulin omega polypeptide) (Lambda 5) (CD179b antigen)              |
| XP_849373.1 | PREDICTED: similar to ATP-binding cassette, sub-family B, member 9 precursor (ATP-binding cassette transporter 9) (ABC transporter 9 protein) (TAP-like protein) (TAPL) (hABCB9) isoform 3 |
| XP_849377.1 | PREDICTED: similar to Transcription factor-like protein 4 (Max-like bHLHZip protein) (BigMax protein) (Mlx) isoform 1                                                                      |
| XP_849378.1 | PREDICTED: similar to collagen, type XXIII, alpha 1                                                                                                                                        |
| XP_849380.1 | PREDICTED: similar to zona pellucida binding protein                                                                                                                                       |
| XP_849382.1 | PREDICTED: similar to protocadherin gamma subfamily B, 2 isoform 1 precursor                                                                                                               |
| XP_849383.1 | PREDICTED: similar to Immunoglobulin lambda-like polypeptide 1 precursor (Immunoglobulin-related 14.1 protein) (Immunoglobulin omega polypeptide) (Lambda 5) (CD179b antigen)              |
| XP_849388.1 | PREDICTED: similar to Tankyrase 1 (TANK1) (Tankyrase I) (TNKS-1) (TRF1-interacting ankyrin-related ADP-ribose polymerase) isoform 3                                                        |
| XP_849389.1 | PREDICTED: similar to odd Oz/ten-m homolog 4 isoform 3                                                                                                                                     |
| XP_849391.1 | PREDICTED: similar to SH3-domain kinase binding protein 1 isoform b isoform 1                                                                                                              |
| XP_849394.1 | PREDICTED: similar to Heterogeneous nuclear ribonucleoprotein A1 (Helix-destabilizing protein) (Single-strand binding protein) (hnRNP core protein A1) (HDP)                               |
| XP_849399.1 | PREDICTED: similar to Estradiol 17-beta-dehydrogenase 1 (17-beta-HSD 1) (Placental 17-beta-hydroxysteroid dehydrogenase) (20 alpha-hydroxysteroid dehydrogenase) (20-alpha-HSD) (E2DH)     |
| XP_849404.1 | PREDICTED: similar to HLA-B associated transcript-2 isoform a isoform 2                                                                                                                    |
| XP_849419.1 | PREDICTED: similar to Myosin regulatory light chain 2-A, smooth muscle isoform (Myosin RLC-A) isoform 2                                                                                    |
| XP_849420.1 | PREDICTED: similar to Calpain-3 (Calpain L3) (Calpain p94) (Calcium-activated neutral proteinase 3) (CANP 3) (Muscle-specific calcium-activated neutral protease 3) isoform 2              |
| XP_849421.1 | PREDICTED: hypothetical protein XP_844328 isoform 1                                                                                                                                        |

|             |                                                                                                                                                                            |
|-------------|----------------------------------------------------------------------------------------------------------------------------------------------------------------------------|
| XP_849454.1 | PREDICTED: similar to ring finger protein 150                                                                                                                              |
| XP_849457.1 | PREDICTED: similar to a disintegrin and metalloprotease domain 6, partial                                                                                                  |
| XP_849458.1 | PREDICTED: similar to LINE-1 reverse transcriptase homolog                                                                                                                 |
| XP_849464.1 | PREDICTED: similar to reelin isoform a isoform 3                                                                                                                           |
| XP_849475.1 | PREDICTED: similar to homeo box C5                                                                                                                                         |
| XP_849481.1 | PREDICTED: similar to zinc finger protein 258 isoform 2                                                                                                                    |
| XP_849482.1 | PREDICTED: similar to DnaJ (Hsp40) homolog, subfamily C, member 1 isoform 1                                                                                                |
| XP_849486.1 | PREDICTED: hypothetical protein XP_844393                                                                                                                                  |
| XP_849488.1 | PREDICTED: similar to calcium/calmodulin-dependent protein kinase ID isoform 2                                                                                             |
| XP_849504.1 | PREDICTED: similar to leucine rich repeat containing 27                                                                                                                    |
| XP_849506.1 | PREDICTED: similar to Vacuolar ATP synthase subunit C (V-ATPase C subunit) (Vacuolar proton pump C subunit) isoform 2                                                      |
| XP_849514.1 | PREDICTED: similar to Histone deacetylase 4 (HD4)                                                                                                                          |
| XP_849520.1 | PREDICTED: similar to connector enhancer of kinase suppressor of Ras 2 isoform 2                                                                                           |
| XP_849524.1 | PREDICTED: similar to thymic stromal lymphopoietin isoform 1                                                                                                               |
| XP_849527.1 | PREDICTED: similar to RNA (guanine-7-) methyltransferase                                                                                                                   |
| XP_849533.1 | PREDICTED: similar to ATPase, Class V, type 10D isoform 1                                                                                                                  |
| XP_849535.1 | PREDICTED: similar to solute carrier family 39 (zinc transporter), member 14 isoform 3                                                                                     |
| XP_849543.1 | PREDICTED: similar to a disintegrin and metalloproteinase domain 20 preproprotein                                                                                          |
| XP_849547.1 | PREDICTED: similar to Nebulette (Actin-binding Z-disk protein) isoform 3                                                                                                   |
| XP_849555.1 | PREDICTED: similar to Putative protein C21orf56                                                                                                                            |
| XP_849557.1 | PREDICTED: similar to Rho guanine exchange factor 16                                                                                                                       |
| XP_849559.1 | PREDICTED: similar to Myc-associated zinc finger protein (MAZI) (Purine-binding transcription factor) (Pur-1)                                                              |
| XP_849568.1 | PREDICTED: similar to loss of heterozygosity, 11, chromosomal region 2, gene A homolog isoform 3                                                                           |
| XP_849585.1 | PREDICTED: similar to Sodium/potassium/calcium exchanger 3 precursor (Na+)/K(+)/Ca(2+)-exchange protein 3)                                                                 |
| XP_849593.1 | PREDICTED: similar to AT-rich interactive domain-containing protein 5B (ARID domain-containing protein 5B) (Mrf1-like) (Modulator recognition factor 2) (Mrf-2) isoform 11 |
| XP_849600.1 | PREDICTED: hypothetical protein XP_844507 isoform 2                                                                                                                        |
| XP_849614.1 | PREDICTED: similar to Protein C6orf10                                                                                                                                      |
| XP_849617.1 | PREDICTED: similar to family with sequence similarity 70, member B                                                                                                         |
| XP_849618.1 | PREDICTED: similar to linker for activation of T cells family member 2 isoform 1                                                                                           |
| XP_849619.1 | PREDICTED: similar to EEA1 (Early Endosome Antigen, Rab effector) homolog family member (eea-1)                                                                            |
| XP_849625.1 | PREDICTED: similar to ZC328.3                                                                                                                                              |
| XP_849629.1 | PREDICTED: similar to lipocalin 9                                                                                                                                          |
| XP_849641.1 | PREDICTED: similar to Glyceraldehyde-3-phosphate dehydrogenase (GAPDH)                                                                                                     |
| XP_849649.1 | PREDICTED: similar to regulating synaptic membrane exocytosis 2 isoform 2                                                                                                  |
| XP_849662.1 | PREDICTED: hypothetical protein XP_844569                                                                                                                                  |
| XP_849673.1 | PREDICTED: similar to ribosomal protein S12 isoform 2                                                                                                                      |

|             |                                                                                                                                                                                                               |
|-------------|---------------------------------------------------------------------------------------------------------------------------------------------------------------------------------------------------------------|
| XP_849676.1 | PREDICTED: similar to Superkiller viralicidic activity 2-like 2 isoform 1                                                                                                                                     |
| XP_849680.1 | PREDICTED: similar to Hippocalcin-like protein 4 (HLP4)                                                                                                                                                       |
| XP_849696.1 | PREDICTED: similar to Trifunctional enzyme beta subunit, mitochondrial precursor (TP-beta) isoform 1                                                                                                          |
| XP_849714.1 | PREDICTED: similar to type I hair keratin 5                                                                                                                                                                   |
| XP_849715.1 | PREDICTED: similar to oxidative-stress responsive 1 isoform 2                                                                                                                                                 |
| XP_849721.1 | PREDICTED: similar to ferredoxin reductase isoform 2 precursor isoform 2                                                                                                                                      |
| XP_849734.1 | PREDICTED: hypothetical protein XP_844641 isoform 1                                                                                                                                                           |
| XP_849735.1 | PREDICTED: similar to ataxin 2 related protein isoform C isoform 2                                                                                                                                            |
| XP_849742.1 | PREDICTED: similar to Transmembrane protein 9 precursor (Dermal papilla derived protein 4)                                                                                                                    |
| XP_849745.1 | PREDICTED: similar to twinfilin-like protein isoform 3                                                                                                                                                        |
|             | PREDICTED: similar to Heterogeneous nuclear ribonucleoprotein A1 (Helix-destabilizing protein) (Single-strand binding protein) (hnRNP core protein A1) (HDP-1) (Topoisomerase-inhibitor suppressed) isoform 2 |
| XP_849746.1 |                                                                                                                                                                                                               |
| XP_849750.1 | PREDICTED: similar to RAB1B, member RAS oncogene family                                                                                                                                                       |
| XP_849758.1 | PREDICTED: similar to otoferlin isoform a isoform 2                                                                                                                                                           |
| XP_849769.1 | PREDICTED: similar to Williams Beuren syndrome chromosome region 18                                                                                                                                           |
| XP_849770.1 | PREDICTED: similar to type I hair keratin 8                                                                                                                                                                   |
| XP_849774.1 | PREDICTED: similar to tumor protein p53 binding protein, 1 isoform 3                                                                                                                                          |
| XP_849779.1 | PREDICTED: hypothetical protein XP_844686                                                                                                                                                                     |
| XP_849780.1 | PREDICTED: hypothetical protein XP_844687                                                                                                                                                                     |
| XP_849781.1 | PREDICTED: similar to osterix                                                                                                                                                                                 |
| XP_849786.1 | PREDICTED: similar to G6B protein isoform G6b-C precursor isoform 1                                                                                                                                           |
| XP_849790.1 | PREDICTED: similar to Rho GTPase activating protein 24 isoform 1 isoform 2                                                                                                                                    |
| XP_849794.1 | PREDICTED: similar to Transcription intermediary factor 1-alpha (TIF1-alpha) (Tripartite motif protein 24) (RING finger protein 82)                                                                           |
| XP_849800.1 | PREDICTED: similar to Glyceraldehyde-3-phosphate dehydrogenase, liver (GAPDH)                                                                                                                                 |
| XP_849804.1 | PREDICTED: similar to RIKEN cDNA 1110030K22 isoform 5                                                                                                                                                         |
| XP_849805.1 | PREDICTED: similar to MondoA isoform 2                                                                                                                                                                        |
| XP_849808.1 | PREDICTED: similar to hect domain and RLD 4 isoform a isoform 2                                                                                                                                               |
| XP_849812.1 | PREDICTED: similar to tropomyosin 1 alpha chain isoform 4 isoform 3                                                                                                                                           |
| XP_849814.1 | PREDICTED: similar to cordon-bleu homolog                                                                                                                                                                     |
| XP_849821.1 | PREDICTED: similar to a disintegrin and metalloproteinase domain 22 isoform 2 preproprotein isoform 3                                                                                                         |
| XP_849824.1 | PREDICTED: similar to Ubiquitin conjugation factor E4 B (Ubiquitin-fusion degradation protein 2) (Homozygously deleted in neuroblastoma-1) isoform 1                                                          |
| XP_849828.1 | PREDICTED: similar to extra spindle poles like 1                                                                                                                                                              |
| XP_849832.1 | PREDICTED: similar to Non-muscle caldesmon (CDM) (L-caldesmon) isoform 1                                                                                                                                      |
| XP_849833.1 | PREDICTED: similar to Tryptophan-rich protein (Congenital heart disease 5 protein) isoform 1                                                                                                                  |
| XP_849838.1 | PREDICTED: similar to surfeit 6                                                                                                                                                                               |
| XP_849841.1 | PREDICTED: similar to zinc finger protein 297                                                                                                                                                                 |

|             |                                                                                                                                                                                                                                              |
|-------------|----------------------------------------------------------------------------------------------------------------------------------------------------------------------------------------------------------------------------------------------|
| XP_849851.1 | PREDICTED: similar to Cell division protein kinase 8 (Protein kinase K35) isoform 2                                                                                                                                                          |
| XP_849856.1 | PREDICTED: similar to CG12113-PA                                                                                                                                                                                                             |
| XP_849857.1 | PREDICTED: similar to bromodomain containing protein 3                                                                                                                                                                                       |
| XP_849858.1 | PREDICTED: similar to malate dehydrogenase, mitochondrial                                                                                                                                                                                    |
| XP_849869.1 | PREDICTED: similar to Kinesin-like protein KIFC1 (Kinesin-like protein 2) (Kinesin-related protein HSET)                                                                                                                                     |
| XP_849871.1 | PREDICTED: similar to SH2 domain-containing putative adapter SH2-B                                                                                                                                                                           |
| XP_849882.1 | PREDICTED: similar to neuronal pentraxin with chromo domain isoform 3 isoform 3                                                                                                                                                              |
| XP_849884.1 | PREDICTED: hypothetical protein XP_844791 isoform 1                                                                                                                                                                                          |
| XP_849889.1 | PREDICTED: similar to T-cell receptor alpha chain C region                                                                                                                                                                                   |
| XP_849893.1 | PREDICTED: similar to Tyrosine-protein phosphatase, non-receptor type 13 (Protein-tyrosine phosphatase 1E) (PTP-E1) (hPTE1) (PTP-BAS) (Protein-tyrosine phosphatase PTPL1) (Fas-associated protein-tyrosine phosphatase 1) (FAP-1) isoform 3 |
| XP_849896.1 | PREDICTED: similar to zinc finger and BTB domain containing 9                                                                                                                                                                                |
| XP_849903.1 | PREDICTED: similar to F-box/LRR-repeat protein 10 (F-box and leucine-rich repeat protein 10) (F-box protein FBL10) (JEMMA protein) (CXXC finger protein 2) (Protein containing CXXC domain 2) isoform 2                                      |
| XP_849922.1 | PREDICTED: similar to CG12713-PA                                                                                                                                                                                                             |
| XP_849929.1 | PREDICTED: similar to selenoprotein O                                                                                                                                                                                                        |
| XP_849933.1 | PREDICTED: similar to Rho GDP dissociation inhibitor (GDI) alpha                                                                                                                                                                             |
| XP_849935.1 | PREDICTED: similar to Ubiquitin carboxyl-terminal hydrolase 15 (Ubiquitin thiolesterase 15) (Ubiquitin-specific processing protease 15) (Deubiquitinating enzyme 15) (Unph-2) (Unph4) isoform 2                                              |
| XP_849937.1 | PREDICTED: similar to DnaJ homolog subfamily A member 1 (Heat shock 40 kDa protein 4) (DnaJ protein homolog 2) (HSJ-2) (HSDJ) isoform 1                                                                                                      |
| XP_849938.1 | PREDICTED: similar to fibroblast growth factor 9 precursor isoform 2                                                                                                                                                                         |
| XP_849939.1 | PREDICTED: similar to Leucine-zipper-like transcriptional regulator 1 (LZTR-1) isoform 1                                                                                                                                                     |
| XP_849944.1 | PREDICTED: similar to malate dehydrogenase, mitochondrial                                                                                                                                                                                    |
| XP_849951.1 | PREDICTED: similar to LEM domain containing 2                                                                                                                                                                                                |
| XP_849962.1 | PREDICTED: similar to collaborates/cooperates with ARF (alternate reading frame) protein                                                                                                                                                     |
| XP_849985.1 | PREDICTED: similar to Complement factor B precursor (C3/C5 convertase) (Properdin factor B) (Glycine-rich beta glycoprotein) (GBG) (PBF2) isoform 2                                                                                          |
| XP_849994.1 | PREDICTED: similar to tripartite motif-containing 9                                                                                                                                                                                          |
| XP_850003.1 | PREDICTED: similar to shroom                                                                                                                                                                                                                 |
| XP_850008.1 | PREDICTED: similar to Keratin, type II cytoskeletal 6A (Cytokeratin 6A) (CK 6A) (K6a keratin) isoform 2                                                                                                                                      |
| XP_850010.1 | PREDICTED: similar to RNA polymerase III transcription initiation factor BRF2                                                                                                                                                                |
| XP_850012.1 | PREDICTED: similar to keratin 6 irs3                                                                                                                                                                                                         |
| XP_850032.1 | PREDICTED: similar to Microtubule-associated protein tau (Neurofibrillary tangle protein) (Paired helical filament-tau) (PHF-tau) isoform 2                                                                                                  |
| XP_850034.1 | PREDICTED: similar to TAF45 protein                                                                                                                                                                                                          |
| XP_850043.1 | PREDICTED: similar to arrestin beta 1 isoform A isoform 2                                                                                                                                                                                    |
| XP_850058.1 | PREDICTED: similar to type I hair keratin KA36                                                                                                                                                                                               |
| XP_850060.1 | PREDICTED: similar to CUB and Sushi multiple domains 3 isoform 1 isoform 2                                                                                                                                                                   |
| XP_850062.1 | PREDICTED: similar to conserved nuclear protein Nhn1 isoform 3                                                                                                                                                                               |

|             |                                                                                                                                                                                                                                    |
|-------------|------------------------------------------------------------------------------------------------------------------------------------------------------------------------------------------------------------------------------------|
| XP_850063.1 | PREDICTED: similar to 14-3-3 protein epsilon (14-3-3E) (Mitochondrial import stimulation factor L subunit) (MSF L) isoform 1                                                                                                       |
| XP_850085.1 | PREDICTED: similar to Scm-like with four mbt domains 1                                                                                                                                                                             |
| XP_850086.1 | PREDICTED: similar to Adipocyte plasma membrane-associated protein (BSCv protein)                                                                                                                                                  |
| XP_850091.1 | PREDICTED: similar to keratin 20                                                                                                                                                                                                   |
| XP_850095.1 | PREDICTED: similar to 43 kDa receptor-associated protein of the synapse (RAPsyn) (Acetylcholine receptor-associated 43 kDa protein) (43 kDa postsynaptic protein) isoform 1                                                        |
| XP_850098.1 | PREDICTED: similar to myosin, heavy polypeptide 10, non-muscle isoform 2                                                                                                                                                           |
| XP_850103.1 | PREDICTED: similar to Glyceraldehyde-3-phosphate dehydrogenase (GAPDH)                                                                                                                                                             |
| XP_850110.1 | PREDICTED: similar to Vpr-binding protein isoform 2                                                                                                                                                                                |
| XP_850111.1 | PREDICTED: similar to elongation factor Tu GTP binding domain containing 1 isoform 6                                                                                                                                               |
| XP_850112.1 | PREDICTED: similar to eukaryotic translation elongation factor 1 alpha 2 isoform 1                                                                                                                                                 |
| XP_850113.1 | PREDICTED: similar to heat shock protein 1, beta                                                                                                                                                                                   |
| XP_850127.1 | PREDICTED: similar to GMP reductase 2 (Guanosine 5-monophosphate oxidoreductase 2) (Guanosine monophosphate reductase 2) isoform 3                                                                                                 |
| XP_850131.1 | PREDICTED: hypothetical protein XP_845038                                                                                                                                                                                          |
| XP_850138.1 | PREDICTED: similar to visual system homeobox 1 protein isoform a                                                                                                                                                                   |
| XP_850144.1 | PREDICTED: hypothetical protein XP_845051                                                                                                                                                                                          |
| XP_850148.1 | PREDICTED: similar to beta-2-microglobulin precursor isoform 3                                                                                                                                                                     |
| XP_850160.1 | PREDICTED: similar to threonyl-tRNA synthetase-like 1 isoform 2                                                                                                                                                                    |
| XP_850166.1 | PREDICTED: similar to keratin, hair, basic, 3                                                                                                                                                                                      |
| XP_850167.1 | PREDICTED: similar to phosphoribosylformylglycinamide synthase                                                                                                                                                                     |
| XP_850180.1 | PREDICTED: similar to Thioredoxin-dependent peroxide reductase, mitochondrial precursor (Peroxiredoxin 3) (Antioxidant protein 1) (AOP-1) (MER5 protein homolog) (HBC189) (PRX III)                                                |
| XP_850181.1 | PREDICTED: similar to thioredoxin reductase 2 isoform 1 precursor                                                                                                                                                                  |
| XP_850184.1 | PREDICTED: similar to Insulin-like growth factor binding protein 4 precursor (IGFBP-4) (IBP-4) (IGF-binding protein 4)                                                                                                             |
| XP_850196.1 | PREDICTED: similar to phosphoinositide-3-kinase, regulatory subunit 5, p101 isoform 1                                                                                                                                              |
| XP_850197.1 | PREDICTED: similar to TPR domain, ankyrin-repeat and coiled-coil-containing isoform 2                                                                                                                                              |
| XP_850205.1 | PREDICTED: similar to fibroblast activation protein, alpha subunit                                                                                                                                                                 |
| XP_850224.1 | PREDICTED: similar to Proprotein convertase subtilisin/kexin type 7 precursor (Proprotein convertase PC7) (Subtilisin/kexin-like protease PC7) (Prohormone convertase PC7) (PC8) (hPC8) (Lymphoma proprotein convertase) isoform 3 |
| XP_850235.1 | PREDICTED: similar to heat shock protein 8                                                                                                                                                                                         |
| XP_850237.1 | PREDICTED: similar to exostoses (multiple)-like 3                                                                                                                                                                                  |
| XP_850256.1 | PREDICTED: similar to TGF-beta induced apoptosis protein 12 isoform 3                                                                                                                                                              |
| XP_850262.1 | PREDICTED: similar to Succinate dehydrogenase [ubiquinone] iron-sulfur protein, mitochondrial precursor (Ip) (Iron-sulfur subunit of complex II)                                                                                   |
| XP_850263.1 | PREDICTED: similar to zinc finger CCCH-type containing 12A                                                                                                                                                                         |
| XP_850267.1 | PREDICTED: similar to cytochrome P450, family 26, subfamily C, polypeptide 1                                                                                                                                                       |
| XP_850273.1 | PREDICTED: similar to mannan-binding lectin serine protease 1 isoform 2 precursor isoform 2                                                                                                                                        |
| XP_850282.1 | PREDICTED: similar to Collagen alpha 1(VII) chain precursor (Long-chain collagen) (LC collagen)                                                                                                                                    |



|             |                                                                                                                                                                                                                     |
|-------------|---------------------------------------------------------------------------------------------------------------------------------------------------------------------------------------------------------------------|
| XP_850284.1 | PREDICTED: similar to vacuolar protein sorting 16 isoform 1 isoform 1                                                                                                                                               |
| XP_850288.1 | PREDICTED: similar to BAI1-associated protein 2-like 1 isoform 3                                                                                                                                                    |
| XP_850290.1 | PREDICTED: similar to heat shock protein 1, beta                                                                                                                                                                    |
| XP_850291.1 | PREDICTED: similar to Platelet glycoprotein Ib beta chain precursor (GP-Ib beta) (GPIbB) (GPIb-beta)                                                                                                                |
| XP_850296.1 | PREDICTED: similar to human immunodeficiency virus type I enhancer binding protein 2 isoform 1                                                                                                                      |
| XP_850297.1 | PREDICTED: similar to MUF1 protein isoform 1                                                                                                                                                                        |
| XP_850299.1 | PREDICTED: similar to myosin, heavy polypeptide 13, skeletal muscle isoform 2                                                                                                                                       |
| XP_850301.1 | PREDICTED: similar to HECT domain containing 1 isoform 1                                                                                                                                                            |
| XP_850302.1 | PREDICTED: similar to Zinc finger protein 364 (Rabring 7)                                                                                                                                                           |
| XP_850304.1 | PREDICTED: similar to Netrin-1 precursor                                                                                                                                                                            |
| XP_850307.1 | PREDICTED: similar to Ficolin-1 precursor (Collagen/fibrinogen domain-containing protein 1) (Ficolin-A) (Ficolin A) (M-Ficolin)                                                                                     |
| XP_850311.1 | PREDICTED: similar to heparanase 2 isoform 2                                                                                                                                                                        |
| XP_850312.1 | PREDICTED: similar to zinc finger protein 259 isoform 2                                                                                                                                                             |
| XP_850318.1 | PREDICTED: hypothetical protein XP_845225                                                                                                                                                                           |
| XP_850320.1 | PREDICTED: similar to Putative GTP-binding protein PTD004 isoform 2                                                                                                                                                 |
| XP_850322.1 | PREDICTED: similar to nudix (nucleoside diphosphate linked moiety X)-type motif 17                                                                                                                                  |
| XP_850327.1 | PREDICTED: similar to SWI/SNF-related matrix-associated actin-dependent regulator of chromatin subfamily D member 3 (60 kDa BRG-1/Brm associated factor subunit C) (BRG1-associated factor 60C) (mBAF60c) isoform 3 |
| XP_850331.1 | PREDICTED: similar to glutamate receptor 7 precursor                                                                                                                                                                |
| XP_850341.1 | PREDICTED: similar to phosphoinositide-3-kinase, regulatory subunit, polypeptide 1 isoform 1 isoform 2                                                                                                              |
| XP_850350.1 | PREDICTED: similar to zinc transporter ZTL1 isoform 1 isoform 2                                                                                                                                                     |
| XP_850355.1 | PREDICTED: similar to integrin, alpha 10 precursor                                                                                                                                                                  |
| XP_850358.1 | PREDICTED: similar to urotensin 2 domain containing                                                                                                                                                                 |
| XP_850363.1 | PREDICTED: similar to Ras-related protein Rab-40B (SOCS box containing protein RAR) (Rar protein)                                                                                                                   |
| XP_850365.1 | PREDICTED: similar to glutamate receptor, metabotropic 1 isoform 2                                                                                                                                                  |
| XP_850368.1 | PREDICTED: similar to Rho GTPase activating protein 5 isoform a isoform 1                                                                                                                                           |
| XP_850380.1 | PREDICTED: similar to glycerol-3-phosphate dehydrogenase 1 (soluble) isoform 2                                                                                                                                      |
| XP_850394.1 | PREDICTED: similar to SAM and SH3 domain containing protein 1 (Proline-glutamate repeat-containing protein) isoform 2                                                                                               |
| XP_850398.1 | PREDICTED: similar to G2/mitotic-specific cyclin B1 isoform 1                                                                                                                                                       |
| XP_850410.1 | PREDICTED: similar to Adaptin ear-binding coat-associated protein 2 (NECAP-2)                                                                                                                                       |
| XP_850411.1 | PREDICTED: similar to Tyrosine-protein kinase SYK (Spleen tyrosine kinase) isoform 3                                                                                                                                |
| XP_850417.1 | PREDICTED: similar to CG13139-PA                                                                                                                                                                                    |
| XP_850418.1 | PREDICTED: similar to angiotensin II receptor-associated protein                                                                                                                                                    |
| XP_850433.1 | PREDICTED: similar to fidgetin                                                                                                                                                                                      |
| XP_850437.1 | PREDICTED: similar to SEC13-like 1 isoform 1                                                                                                                                                                        |
| XP_850441.1 | PREDICTED: similar to Tricarboxylate transport protein, mitochondrial precursor (Citrate transport protein) (CTP) (Tricarboxylate carrier protein)                                                                  |

|             |                                                                                                                                                                                                         |
|-------------|---------------------------------------------------------------------------------------------------------------------------------------------------------------------------------------------------------|
| XP_850445.1 | PREDICTED: similar to myosin, heavy polypeptide 13, skeletal muscle                                                                                                                                     |
| XP_850455.1 | PREDICTED: similar to testis expressed gene 2 isoform 2                                                                                                                                                 |
| XP_850457.1 | PREDICTED: similar to poly(A) binding protein, cytoplasmic 4 isoform 2                                                                                                                                  |
| XP_850462.1 | PREDICTED: similar to chromatin modifying protein 6                                                                                                                                                     |
| XP_850463.1 | PREDICTED: hypothetical protein XP_845370                                                                                                                                                               |
| XP_850469.1 | PREDICTED: similar to GPI deacylase                                                                                                                                                                     |
| XP_850472.1 | PREDICTED: similar to zinc finger protein 512 isoform 1                                                                                                                                                 |
| XP_850477.1 | PREDICTED: similar to nucleolin-related protein isoform 1                                                                                                                                               |
| XP_850486.1 | PREDICTED: similar to TERF1-interacting nuclear factor 2 (TRF1-interacting nuclear protein 2)                                                                                                           |
| XP_850487.1 | PREDICTED: similar to raptor                                                                                                                                                                            |
| XP_850492.1 | PREDICTED: similar to Probable ATP-dependent RNA helicase DDX6 (DEAD-box protein 6) (ATP-dependent RNA helicase p54) (Oncogene RCK) isoform 1                                                           |
| XP_850496.1 | PREDICTED: similar to fibrocystin L                                                                                                                                                                     |
| XP_850498.1 | PREDICTED: similar to tubulin, beta, 2                                                                                                                                                                  |
| XP_850500.1 | PREDICTED: similar to fibroblast growth factor receptor substrate 2 isoform 3                                                                                                                           |
| XP_850502.1 | PREDICTED: similar to UDP-glucuronosyltransferase 2B4 precursor (UDPGT) (Hyodeoxycholic acid) (HLUG25) (UDPGTh-1) isoform 1                                                                             |
| XP_850514.1 | PREDICTED: hypothetical protein XP_845421                                                                                                                                                               |
| XP_850518.1 | PREDICTED: similar to UDP-GlcNAc:betaGal beta-1,3-N-acetylglucosaminyltransferase-like 1                                                                                                                |
| XP_850519.1 | PREDICTED: similar to tropomyosin 3 isoform 2                                                                                                                                                           |
| XP_850520.1 | PREDICTED: similar to two AAA domain containing protein isoform 2                                                                                                                                       |
| XP_850521.1 | PREDICTED: similar to CG7074-PA isoform 2                                                                                                                                                               |
| XP_850523.1 | PREDICTED: similar to oxysterol-binding protein-like protein 10 isoform 2                                                                                                                               |
| XP_850532.1 | PREDICTED: similar to Phosphatidylinositol-4-phosphate 5-kinase type II alpha (PIP5KII-alpha) (1-phosphatidylinositol-4-phosphate 5-kinase) (PtdIns(4)P-5-kinase B isoform) (Diphosphoinositide kinase) |
| XP_850533.1 | PREDICTED: similar to actin-like 6B                                                                                                                                                                     |
| XP_850534.1 | PREDICTED: similar to glyceraldehyde-3-phosphate dehydrogenase                                                                                                                                          |
| XP_850535.1 | PREDICTED: similar to General transcription factor 3C polypeptide 4 (Transcription factor IIIC-delta subunit) (TF3C-delta) (TFIIIC 90 kDa subunit) (TFIIIC 90)                                          |
| XP_850543.1 | PREDICTED: similar to zinc finger protein 281                                                                                                                                                           |
| XP_850545.1 | PREDICTED: similar to ubiquitin-activating enzyme E1-like isoform 1                                                                                                                                     |
| XP_850547.1 | PREDICTED: similar to F-box only protein 24                                                                                                                                                             |
| XP_850549.1 | PREDICTED: similar to Probable dolichyl pyrophosphate Glc1Man9GlcNAc2 alpha-1,3-glucosyltransferase (Dolichyl-P-Glc:Glc1Man9GlcNAc2-PP-dolichyl glucosyltransferase)                                    |
| XP_850554.1 | PREDICTED: similar to regulator of G-protein signalling 12 isoform 1 isoform 2                                                                                                                          |
| XP_850562.1 | PREDICTED: hypothetical protein XP_845469                                                                                                                                                               |
| XP_850567.1 | PREDICTED: hypothetical protein XP_845474 isoform 2                                                                                                                                                     |
| XP_850574.1 | PREDICTED: hypothetical protein XP_845481                                                                                                                                                               |
| XP_850575.1 | PREDICTED: similar to Probable ATP-dependent 61 kDa nucleolar RNA helicase (DEAD-box protein 56) (DEAD-box protein 21)                                                                                  |
| XP_850584.1 | PREDICTED: similar to G protein-coupled receptor 157                                                                                                                                                    |

|             |                                                                                                                                                                                    |
|-------------|------------------------------------------------------------------------------------------------------------------------------------------------------------------------------------|
| XP_850604.1 | PREDICTED: similar to BNIP2 motif containing molecule at the carboxyl terminal region 1                                                                                            |
| XP_850607.1 | PREDICTED: similar to CD2-associated protein                                                                                                                                       |
| XP_850611.1 | PREDICTED: similar to Receptor-interacting serine/threonine-protein kinase 3 (RIP-like protein kinase 3) (Receptor-interacting protein 3) (RIP-3) (mRIP3)                          |
| XP_850614.1 | PREDICTED: similar to Transcription initiation factor TFIID subunit 9 (Transcription initiation factor TFIID 31 kDa subunit) (TAFII-31) (TAFII-32) (TAFII32) (STAF31/32) isoform 1 |
| XP_850616.1 | PREDICTED: similar to trinucleotide repeat containing 15 isoform 1                                                                                                                 |
| XP_850632.1 | PREDICTED: similar to proline arginine rich coiled coil 1                                                                                                                          |
| XP_850641.1 | PREDICTED: similar to Estrogen sulfotransferase (Sulfotransferase, estrogen-preferring) (EST-1) isoform 3                                                                          |
| XP_850642.1 | PREDICTED: similar to GDP-mannose pyrophosphorylase B isoform 2 isoform 2                                                                                                          |
| XP_850645.1 | PREDICTED: similar to DEAD (Asp-Glu-Ala-As) box polypeptide 19 isoform 2 isoform 1                                                                                                 |
| XP_850649.1 | PREDICTED: similar to Lysosomal alpha-glucosidase precursor (Acid maltase) (Aglucosidase alfa)                                                                                     |
| XP_850671.1 | PREDICTED: hypothetical protein XP_845578                                                                                                                                          |
| XP_850680.1 | PREDICTED: similar to nucleoporin 214kDa                                                                                                                                           |
| XP_850706.1 | PREDICTED: similar to carbohydrate (keratan sulfate Gal-6) sulfotransferase 1 isoform 2                                                                                            |
| XP_850713.1 | PREDICTED: hypothetical protein XP_845620                                                                                                                                          |
| XP_850714.1 | PREDICTED: similar to myeloid/lymphoid or mixed-lineage leukemia (trithorax homolog, Drosophila); translocated to, 6                                                               |
| XP_850723.1 | PREDICTED: similar to RNA-binding protein 9 (RNA binding motif protein 9) (Hexaribonucleotide binding protein 2) (Repressor of tamoxifen transcriptional activity) isoform 3       |
| XP_850731.1 | PREDICTED: hypothetical protein XP_845638                                                                                                                                          |
| XP_850749.1 | PREDICTED: similar to Chromobox protein homolog 8 (Polycomb 3 homolog) (Pc3) (HPC3) (Rectachrome 1)                                                                                |
| XP_850750.1 | PREDICTED: similar to SNAP25-interacting protein                                                                                                                                   |
| XP_850754.1 | PREDICTED: similar to basic transcription factor 3 isoform 2                                                                                                                       |
| XP_850756.1 | PREDICTED: similar to TruB pseudouridine (psi) synthase homolog 2 isoform 1                                                                                                        |
| XP_850757.1 | PREDICTED: similar to helicase (DNA) B                                                                                                                                             |
| XP_850765.1 | PREDICTED: similar to keratin 13 isoform a isoform 2                                                                                                                               |
| XP_850768.1 | PREDICTED: hypothetical protein XP_845675                                                                                                                                          |
| XP_850770.1 | PREDICTED: similar to Exosome complex exonuclease RRP4 (Ribosomal RNA processing protein 4) (Exosome component 2)                                                                  |
| XP_850781.1 | PREDICTED: similar to NEDD4-like ubiquitin-protein ligase 1                                                                                                                        |
| XP_850782.1 | PREDICTED: similar to putative tumor suppressor FUS2                                                                                                                               |
| XP_850786.1 | PREDICTED: similar to PR domain containing 12                                                                                                                                      |
| XP_850796.1 | PREDICTED: similar to PHD finger protein 20-like 1 isoform 1 isoform 2                                                                                                             |
| XP_850800.1 | PREDICTED: similar to ectonucleotide pyrophosphatase/phosphodiesterase 7                                                                                                           |
| XP_850807.1 | PREDICTED: similar to C53D5.1a                                                                                                                                                     |
| XP_850810.1 | PREDICTED: similar to Stromal cell-derived factor 2-like protein 1 precursor (SDF2 like protein 1) (PWP1-interacting protein 8)                                                    |
| XP_850818.1 | PREDICTED: similar to mitochondrial malate dehydrogenase precursor                                                                                                                 |
| XP_850820.1 | PREDICTED: hypothetical protein XP_845727                                                                                                                                          |
| XP_850837.1 | PREDICTED: similar to phosphoinositide-3-kinase adaptor protein 1                                                                                                                  |
| XP_850840.1 | PREDICTED: similar to oxoglutarate (alpha-ketoglutarate) dehydrogenase (lipoamide) isoform 1 precursor, partial                                                                    |

|             |                                                                                                                                                                                                                                                                                                                                |
|-------------|--------------------------------------------------------------------------------------------------------------------------------------------------------------------------------------------------------------------------------------------------------------------------------------------------------------------------------|
| XP_850847.1 | PREDICTED: similar to poly (ADP-ribose) polymerase family, member 14                                                                                                                                                                                                                                                           |
| XP_850862.1 | PREDICTED: similar to tetratricopeptide repeat domain 21B                                                                                                                                                                                                                                                                      |
| XP_850870.1 | PREDICTED: similar to CDK2-associated protein 1                                                                                                                                                                                                                                                                                |
| XP_850872.1 | PREDICTED: similar to [Segment 2 of 2] Runt-related transcription factor 2 (Core-binding factor, alpha 1 subunit) (CBF-alpha 1) (Osteoblast-specific transcription factor 2) (OSF-2), partial                                                                                                                                  |
| XP_850873.1 | PREDICTED: similar to Synapsin-3 (Synapsin III) isoform 2                                                                                                                                                                                                                                                                      |
| XP_850874.1 | PREDICTED: similar to eukaryotic translation elongation factor 1 alpha 2 isoform 2                                                                                                                                                                                                                                             |
| XP_850880.1 | PREDICTED: similar to poly (ADP-ribose) polymerase family, member 14                                                                                                                                                                                                                                                           |
| XP_850884.1 | PREDICTED: similar to beta isoform of regulatory subunit A, protein phosphatase 2 isoform b isoform 2                                                                                                                                                                                                                          |
| XP_850894.1 | PREDICTED: similar to cisplatin resistance associated                                                                                                                                                                                                                                                                          |
| XP_850897.1 | PREDICTED: similar to MON1 homolog A                                                                                                                                                                                                                                                                                           |
| XP_850908.1 | PREDICTED: similar to heparanase                                                                                                                                                                                                                                                                                               |
| XP_850910.1 | PREDICTED: similar to ubiquitin specific protease 6, partial                                                                                                                                                                                                                                                                   |
| XP_850922.1 | PREDICTED: similar to ATP-binding cassette, sub-family A, member 6 isoform a isoform 2                                                                                                                                                                                                                                         |
| XP_850929.1 | PREDICTED: similar to TRAF-interacting protein                                                                                                                                                                                                                                                                                 |
| XP_850930.1 | PREDICTED: similar to Protein KIAA0690                                                                                                                                                                                                                                                                                         |
| XP_850937.1 | PREDICTED: similar to eukaryotic translation elongation factor 1 alpha 1                                                                                                                                                                                                                                                       |
| XP_850954.1 | PREDICTED: similar to type IV alpha 6 collagen isoform A precursor isoform 2                                                                                                                                                                                                                                                   |
| XP_850956.1 | PREDICTED: similar to a disintegrin and metalloproteinase domain 28 isoform 1 preproprotein                                                                                                                                                                                                                                    |
| XP_850961.1 | PREDICTED: similar to ATP synthase, H <sup>+</sup> transporting, mitochondrial F1 complex, gamma subunit isoform H (heart) precursor                                                                                                                                                                                           |
| XP_850963.1 | PREDICTED: similar to SEC24-related protein C isoform 2                                                                                                                                                                                                                                                                        |
| XP_850972.1 | PREDICTED: similar to Twist related protein 1 (H-twist) isoform 2                                                                                                                                                                                                                                                              |
| XP_850973.1 | PREDICTED: similar to spastin isoform 1 isoform 1                                                                                                                                                                                                                                                                              |
| XP_850976.1 | PREDICTED: similar to Golgi-specific brefeldin A-resistance guanine nucleotide exchange factor 1 (BFA-resistant GEF 1) isoform 2                                                                                                                                                                                               |
| XP_850979.1 | PREDICTED: similar to zinc finger, MYM domain containing 1                                                                                                                                                                                                                                                                     |
| XP_850984.1 | PREDICTED: similar to copine 7 isoform a                                                                                                                                                                                                                                                                                       |
| XP_850990.1 | PREDICTED: similar to CTAGE family, member 5 isoform 2 isoform 3                                                                                                                                                                                                                                                               |
| XP_850991.1 | PREDICTED: similar to tubulin, alpha 1                                                                                                                                                                                                                                                                                         |
| XP_850998.1 | PREDICTED: similar to tubulin, alpha 1                                                                                                                                                                                                                                                                                         |
| XP_851006.1 | PREDICTED: similar to Baculoviral IAP repeat-containing protein 6 (Ubiquitin-conjugating BIR-domain enzyme apollon) isoform 2<br>PREDICTED: similar to Inositol 1,4,5-trisphosphate receptor type 1 (Type 1 inositol 1,4,5-trisphosphate receptor) (Type 1 InsP3 receptor) (IP3 receptor isoform 1) (InsP3R1) (IP3R) isoform 2 |
| XP_851008.1 |                                                                                                                                                                                                                                                                                                                                |
| XP_851014.1 | PREDICTED: similar to extracellular matrix protein 1 isoform 1 precursor                                                                                                                                                                                                                                                       |
| XP_851016.1 | PREDICTED: similar to SH2-B PH domain containing signaling mediator 1                                                                                                                                                                                                                                                          |
| XP_851017.1 | PREDICTED: similar to EH-domain containing protein 4 (Hepatocellular carcinoma-associated protein 10/11)                                                                                                                                                                                                                       |
| XP_851019.1 | PREDICTED: similar to Mitogen-activated protein kinase kinase kinase 4 (MAPK/ERK kinase kinase 4) (MEK kinase 4) (MEKK 4) (MAP three kinase 1) isoform 1                                                                                                                                                                       |

|             |                                                                                                                                                                                                                                                                               |
|-------------|-------------------------------------------------------------------------------------------------------------------------------------------------------------------------------------------------------------------------------------------------------------------------------|
| XP_851025.1 | PREDICTED: similar to Microtubule-associated protein RP/EB family member 1 (APC-binding protein EB1) (End-binding protein 1) (EB1)                                                                                                                                            |
| XP_851040.1 | PREDICTED: similar to dachshund 2                                                                                                                                                                                                                                             |
| XP_851044.1 | PREDICTED: similar to solute carrier family 25 member 3 isoform b precursor                                                                                                                                                                                                   |
| XP_851054.1 | PREDICTED: similar to cartilage acidic protein 1                                                                                                                                                                                                                              |
| XP_851057.1 | PREDICTED: similar to keratin 8                                                                                                                                                                                                                                               |
| XP_851061.1 | PREDICTED: similar to CG6796-PA                                                                                                                                                                                                                                               |
| XP_851063.1 | PREDICTED: similar to Solute carrier organic anion transporter family, member 3A1 (Solute carrier family 21, member 11) (Sodium-independent organic anion transporter D) (Organic anion transporting polypeptide D) (OATP-D) (Organic anion transporter polypeptide...        |
| XP_851075.1 | PREDICTED: similar to calcium/calmodulin-dependent protein kinase IIB isoform 5                                                                                                                                                                                               |
| XP_851082.1 | PREDICTED: hypothetical protein XP_845989                                                                                                                                                                                                                                     |
| XP_851083.1 | PREDICTED: similar to adenylate kinase 3                                                                                                                                                                                                                                      |
| XP_851086.1 | PREDICTED: similar to G-2 and S-phase expressed 1                                                                                                                                                                                                                             |
| XP_851095.1 | PREDICTED: similar to Tubulin alpha-2 chain (Alpha-tubulin 2)                                                                                                                                                                                                                 |
| XP_851102.1 | PREDICTED: hypothetical protein XP_846009                                                                                                                                                                                                                                     |
| XP_851105.1 | PREDICTED: similar to malate dehydrogenase, mitochondrial                                                                                                                                                                                                                     |
| XP_851117.1 | PREDICTED: similar to codanin 1                                                                                                                                                                                                                                               |
| XP_851119.1 | PREDICTED: similar to polyubiquitin                                                                                                                                                                                                                                           |
| XP_851122.1 | PREDICTED: similar to phytanoyl-CoA dioxygenase domain containing 1 (predicted)                                                                                                                                                                                               |
| XP_851126.1 | PREDICTED: similar to Mitochondrial carnitine/acylcarnitine carrier protein (Carnitine/acylcarnitine translocase) (CAC) isoform 2                                                                                                                                             |
| XP_851127.1 | PREDICTED: similar to mitochondrial ribosomal protein L17 isoform 1                                                                                                                                                                                                           |
| XP_851140.1 | PREDICTED: similar to Nedd-4-like E3 ubiquitin-protein ligase WWP2 (WW domain-containing protein 2) (Atropin-1 interacting protein 2) (AIP2) isoform 2                                                                                                                        |
| XP_851151.1 | PREDICTED: similar to Claudin-23                                                                                                                                                                                                                                              |
| XP_851155.1 | PREDICTED: similar to Dendrin                                                                                                                                                                                                                                                 |
| XP_851160.1 | PREDICTED: similar to Endonuclease G, mitochondrial precursor (Endo G)<br>PREDICTED: similar to Heterogeneous nuclear ribonucleoprotein A1 (Helix-destabilizing protein) (Single-strand binding protein) (hnRNP core protein A1) (HDP-1) (Topoisomerase-inhibitor suppressed) |
| XP_851161.1 |                                                                                                                                                                                                                                                                               |
| XP_851162.1 | PREDICTED: similar to Dynactin subunit 2 (Dynactin complex 50 kDa subunit) (50 kDa dynein-associated polypeptide) (p50 dynamitin) (DCTN-50)                                                                                                                                   |
| XP_851170.1 | PREDICTED: similar to CHMP family, member 7                                                                                                                                                                                                                                   |
| XP_851177.1 | PREDICTED: similar to SCC-112 protein isoform 2<br>PREDICTED: similar to Heterogeneous nuclear ribonucleoprotein A1 (Helix-destabilizing protein) (Single-strand binding protein) (hnRNP core protein A1) (HDP-1) (Topoisomerase-inhibitor suppressed)                        |
| XP_851182.1 |                                                                                                                                                                                                                                                                               |
| XP_851196.1 | PREDICTED: similar to lemur tyrosine kinase 2                                                                                                                                                                                                                                 |
| XP_851201.1 | PREDICTED: similar to peroxisomal biogenesis factor 14                                                                                                                                                                                                                        |
| XP_851202.1 | PREDICTED: similar to WD repeat domain 6 protein                                                                                                                                                                                                                              |
| XP_851203.1 | PREDICTED: similar to Golgi autoantigen, golgin subfamily A member 4 (Trans-Golgi p230) (256 kDa golgin) (Golgin-245) (72.1 protein)                                                                                                                                          |
| XP_851206.1 | PREDICTED: similar to glyceraldehyde-3-phosphate dehydrogenase                                                                                                                                                                                                                |
| XP_851209.1 | PREDICTED: similar to ubiquinol-cytochrome c reductase core protein I isoform 2                                                                                                                                                                                               |

|             |                                                                                                                                                                                                                     |
|-------------|---------------------------------------------------------------------------------------------------------------------------------------------------------------------------------------------------------------------|
| XP_851210.1 | PREDICTED: similar to suppression of tumorigenicity 5 isoform 1 isoform 2                                                                                                                                           |
| XP_851216.1 | PREDICTED: similar to DNA polymerase epsilon subunit 2 isoform 1                                                                                                                                                    |
| XP_851221.1 | PREDICTED: similar to Homeobox protein Hox-B7 (Hox-2C) (HHO.C1)                                                                                                                                                     |
| XP_851229.1 | PREDICTED: similar to serologically defined colon cancer antigen 1 isoform 2                                                                                                                                        |
| XP_851238.1 | PREDICTED: similar to Early growth response protein 1 (EGR-1) (Krox-24 protein) (ZIF268) (Nerve growth factor-induced protein A) (NGFI-A) (Transcription factor ETR103) (Zinc finger protein 225) (AT225) isoform 3 |
| XP_851240.1 | PREDICTED: similar to three prime repair exonuclease 1 isoform d isoform 2                                                                                                                                          |
| XP_851244.1 | PREDICTED: similar to collectin sub-family member 10                                                                                                                                                                |
| XP_851250.1 | PREDICTED: similar to RAS related protein 1b                                                                                                                                                                        |
| XP_851253.1 | PREDICTED: similar to LysM, putative peptidoglycan-binding, domain containing 1                                                                                                                                     |
| XP_851256.1 | PREDICTED: similar to Interleukin-17C precursor (IL-17C) (Cytokine CX2)                                                                                                                                             |
| XP_851262.1 | PREDICTED: similar to Eukaryotic translation initiation factor 5B (eIF-5B) (Translation initiation factor IF-2) isoform 2                                                                                           |
| XP_851271.1 | PREDICTED: hypothetical protein XP_846178                                                                                                                                                                           |
| XP_851287.1 | PREDICTED: similar to LY6/PLAUR domain containing 2                                                                                                                                                                 |
| XP_851299.1 | PREDICTED: similar to adipocyte complement related protein of 30 kDa                                                                                                                                                |
| XP_851302.1 | PREDICTED: similar to Methionine aminopeptidase 2 (MetAP 2) (Peptidase M 2) (Initiation factor 2 associated 67 kDa glycoprotein) (p67) (p67eIF2)                                                                    |
| XP_851304.1 | PREDICTED: similar to eukaryotic translation elongation factor 1 alpha 1                                                                                                                                            |
| XP_851319.1 | PREDICTED: similar to dynein, axonemal, heavy polypeptide 9 isoform 2 isoform 1                                                                                                                                     |
| XP_851322.1 | PREDICTED: similar to Reticulon protein 3 (Neuroendocrine-specific protein-like 2) (NSP-like protein II) (NSPLII)                                                                                                   |
| XP_851323.1 | PREDICTED: similar to T-cell receptor beta chain V region CTL-L17 precursor                                                                                                                                         |
| XP_851332.1 | PREDICTED: similar to ring finger protein 10 isoform 2                                                                                                                                                              |
| XP_851341.1 | PREDICTED: similar to solute carrier family 25, member 28                                                                                                                                                           |
| XP_851349.1 | PREDICTED: similar to T-cell receptor beta chain V region 86T1 precursor                                                                                                                                            |
| XP_851352.1 | PREDICTED: similar to LIM homeobox transcription factor 1 alpha                                                                                                                                                     |
| XP_851359.1 | PREDICTED: similar to RNA U, small nuclear RNA export adaptor (phosphorylation regulated)                                                                                                                           |
| XP_851361.1 | PREDICTED: similar to Krueppel-like factor 15 (Kidney-enriched kruppel-like factor)                                                                                                                                 |
| XP_851372.1 | PREDICTED: similar to NIMA (never in mitosis gene a)-related expressed kinase 6 isoform 2                                                                                                                           |
| XP_851376.1 | PREDICTED: similar to Mdm2, transformed 3T3 cell double minute 2, p53 binding protein binding protein                                                                                                               |
| XP_851379.1 | PREDICTED: hypothetical protein XP_846286                                                                                                                                                                           |
| XP_851382.1 | PREDICTED: similar to ciliary rootlet coiled-coil, rootletin                                                                                                                                                        |
| XP_851384.1 | PREDICTED: similar to neurotrophic tyrosine kinase, receptor, type 3 isoform b precursor                                                                                                                            |
| XP_851386.1 | PREDICTED: similar to Protein kinase, D1 type (nPKC-D1) (Protein kinase D) (Protein kinase C, mu type) (nPKC-mu)                                                                                                    |
| XP_851388.1 | PREDICTED: similar to cytochrome P450, family 11, subfamily B, polypeptide 1 isoform 1 precursor                                                                                                                    |
| XP_851391.1 | PREDICTED: similar to Protein KIAA0152 precursor isoform 1                                                                                                                                                          |
| XP_851392.1 | PREDICTED: similar to trypsin X5                                                                                                                                                                                    |
| XP_851395.1 | PREDICTED: similar to ZKD family zinc finger C isoform 2                                                                                                                                                            |

|             |                                                                                                                                                                    |
|-------------|--------------------------------------------------------------------------------------------------------------------------------------------------------------------|
| XP_851398.1 | PREDICTED: similar to leucyl/cystinyl aminopeptidase isoform 1                                                                                                     |
| XP_851410.1 | PREDICTED: similar to ADP-ribosylation factor-like 6 interacting protein 2 isoform 3                                                                               |
| XP_851411.1 | PREDICTED: similar to galactosidase, beta 1-like isoform 2                                                                                                         |
| XP_851415.1 | PREDICTED: similar to Protection of telomeres 1 (hPot1) (POT1-like telomere end-binding protein)                                                                   |
| XP_851417.1 | PREDICTED: similar to olfactory receptor 281                                                                                                                       |
| XP_851418.1 | PREDICTED: similar to tropomyosin 3 isoform 2                                                                                                                      |
| XP_851419.1 | PREDICTED: similar to phosphatidylinositol-4-phosphate 5-kinase-like 1                                                                                             |
| XP_851420.1 | PREDICTED: similar to protein tyrosine phosphatase, non-receptor type substrate 1 precursor, partial                                                               |
| XP_851424.1 | PREDICTED: similar to 4-aminobutyrate aminotransferase precursor isoform 2                                                                                         |
| XP_851434.1 | PREDICTED: similar to ankyrin 2 isoform 2 isoform 2                                                                                                                |
| XP_851440.1 | PREDICTED: similar to SPFH domain family, member 1                                                                                                                 |
| XP_851446.1 | PREDICTED: similar to Heat shock 70 kDa protein 12B                                                                                                                |
| XP_851450.1 | PREDICTED: similar to Neurexophilin-3 precursor                                                                                                                    |
| XP_851453.1 | PREDICTED: similar to PHD finger protein 21B                                                                                                                       |
| XP_851457.1 | PREDICTED: similar to ankyrin repeat and sterile alpha motif domain containing 1 isoform 1                                                                         |
| XP_851462.1 | PREDICTED: similar to atlastin; guanylate-binding protein 3 isoform 2                                                                                              |
| XP_851465.1 | PREDICTED: similar to carboxyl-terminal modulator protein isoform a                                                                                                |
| XP_851466.1 | PREDICTED: similar to general transcription factor IIF, polypeptide 2                                                                                              |
| XP_851480.1 | PREDICTED: similar to C/EBP-induced protein                                                                                                                        |
| XP_851481.1 | PREDICTED: similar to Folylpolyglutamate synthase, mitochondrial precursor (Folylpoly-gamma-glutamate synthetase) (FPGS) (Tetrahydrofolylpolyglutamate synthase)   |
| XP_851484.1 | PREDICTED: similar to Echinoderm microtubule-associated protein-like 4 (EMAP-4) (Restrictedly overexpressed proliferation-associated protein) (Ropp 120) isoform 2 |
| XP_851485.1 | PREDICTED: similar to nuclear receptor co-repressor 1 isoform 2                                                                                                    |
| XP_851493.1 | PREDICTED: similar to calcium-transporting ATPase 2C1 isoform 1a isoform 2                                                                                         |
| XP_851495.1 | PREDICTED: similar to Doublesex- and mab-3-related transcription factor 1 (DM domain expressed in testis protein 1)                                                |
| XP_851496.1 | PREDICTED: similar to Keratin, type II cytoskeletal 8 (Cytokeratin 8) (Cytokeratin endo A)                                                                         |
| XP_851507.1 | PREDICTED: hypothetical protein XP_846414                                                                                                                          |
| XP_851512.1 | PREDICTED: similar to zinc finger protein 384 isoform 2                                                                                                            |
| XP_851538.1 | PREDICTED: similar to LIM-only protein 6 (Triple LIM domain protein 6) isoform 3                                                                                   |
| XP_851539.1 | PREDICTED: similar to paired box protein 2 isoform c                                                                                                               |
| XP_851540.1 | PREDICTED: similar to ATP synthase lipid-binding protein, mitochondrial precursor (ATP synthase proteolipid P1) (ATPase protein 9) (ATPase subunit C)              |
| XP_851544.1 | PREDICTED: similar to CG8233-PC, isoform C isoform 2                                                                                                               |
| XP_851545.1 | PREDICTED: similar to A-kinase anchor protein 4 isoform 1 isoform 2                                                                                                |
| XP_851546.1 | PREDICTED: similar to RAP1 interacting factor 1                                                                                                                    |
| XP_851550.1 | PREDICTED: similar to putative 40-2-3 protein                                                                                                                      |
| XP_851551.1 | PREDICTED: hypothetical protein XP_846458                                                                                                                          |
| XP_851557.1 | PREDICTED: similar to Probable G-protein coupled receptor 21                                                                                                       |

|             |                                                                                                                                                                                                                                      |
|-------------|--------------------------------------------------------------------------------------------------------------------------------------------------------------------------------------------------------------------------------------|
| XP_851559.1 | PREDICTED: similar to Glutaredoxin (Thioltransferase) (TTase)                                                                                                                                                                        |
| XP_851560.1 | PREDICTED: similar to Protein KIAA0226                                                                                                                                                                                               |
| XP_851562.1 | PREDICTED: similar to Endothelial lipase precursor (Endothelial cell-derived lipase) (EDL) (EL)                                                                                                                                      |
| XP_851563.1 | PREDICTED: similar to niban protein                                                                                                                                                                                                  |
| XP_851565.1 | PREDICTED: similar to butyrate response factor 2 isoform 1                                                                                                                                                                           |
| XP_851566.1 | PREDICTED: similar to chromatin-specific transcription elongation factor large subunit isoform 1                                                                                                                                     |
| XP_851572.1 | PREDICTED: similar to Wilms tumor 1 isoform B                                                                                                                                                                                        |
| XP_851573.1 | PREDICTED: similar to olfactory receptor Olr35                                                                                                                                                                                       |
| XP_851574.1 | PREDICTED: similar to inosine triphosphatase isoform a                                                                                                                                                                               |
| XP_851575.1 | PREDICTED: similar to eukaryotic translation elongation factor 1 alpha 1                                                                                                                                                             |
| XP_851577.1 | PREDICTED: similar to claudin 8                                                                                                                                                                                                      |
| XP_851585.1 | PREDICTED: similar to cardiomyopathy associated 1                                                                                                                                                                                    |
| XP_851588.1 | PREDICTED: similar to Granulocyte-macrophage colony-stimulating factor receptor alpha chain precursor (GM-CSF-R-alpha) (GMR) (CDw116) (CD116 antigen)                                                                                |
| XP_851592.1 | PREDICTED: similar to RIKEN cDNA 5730590G19-like                                                                                                                                                                                     |
| XP_851593.1 | PREDICTED: hypothetical protein XP_846500                                                                                                                                                                                            |
| XP_851597.1 | PREDICTED: similar to retinitis pigmentosa GTPase regulator interacting protein 1 isoform 2                                                                                                                                          |
|             | PREDICTED: similar to Phakinin (Beaded filament structural protein 2) (Lens fiber cell beaded filament protein CP 49) (CP49) (49 kDa cytoskeletal protein) (CP 47) (CP47) (Lens intermediate filament like-light) (LIFL-L) isoform 2 |
| XP_851599.1 |                                                                                                                                                                                                                                      |
| XP_851603.1 | PREDICTED: similar to Nebulin                                                                                                                                                                                                        |
| XP_851604.1 | PREDICTED: similar to testis serine protease 3                                                                                                                                                                                       |
| XP_851612.1 | PREDICTED: similar to Band 4.1-like protein 2 (Generally expressed protein 4.1) (4.1G) isoform 2                                                                                                                                     |
| XP_851626.1 | PREDICTED: similar to interleukin 3 receptor, alpha precursor                                                                                                                                                                        |
| XP_851632.1 | PREDICTED: hypothetical protein XP_846539                                                                                                                                                                                            |
| XP_851634.1 | PREDICTED: similar to ciliary rootlet coiled-coil, rootletin                                                                                                                                                                         |
| XP_851643.1 | PREDICTED: similar to UDP-N-acetyl-alpha-D-galactosamine:polypeptide N-acetylgalactosaminyltransferase-like 4 isoform 2                                                                                                              |
| XP_851645.1 | PREDICTED: similar to melanoma antigen family D, 1 isoform b isoform 3                                                                                                                                                               |
|             | PREDICTED: similar to Heterogeneous nuclear ribonucleoprotein A1 (Helix-destabilizing protein) (Single-strand binding protein) (hnRNP core protein A1) (HDP-1) (Topoisomerase-inhibitor suppressed) isoform 1                        |
| XP_851656.1 |                                                                                                                                                                                                                                      |
| XP_851658.1 | PREDICTED: similar to Epsin-2 (EPS-15 interacting protein 2) isoform 3                                                                                                                                                               |
| XP_851662.1 | PREDICTED: similar to RIKEN cDNA 1700112C13                                                                                                                                                                                          |
| XP_851663.1 | PREDICTED: similar to mesoderm posterior 1                                                                                                                                                                                           |
| XP_851668.1 | PREDICTED: similar to radical S-adenosyl methionine domain containing 1                                                                                                                                                              |
| XP_851670.1 | PREDICTED: similar to TRPC4-associated protein isoform b isoform 2                                                                                                                                                                   |
| XP_851672.1 | PREDICTED: similar to modulator of estrogen induced transcription isoform a isoform 2                                                                                                                                                |
| XP_851674.1 | PREDICTED: similar to a disintegrin-like and metalloprotease (repolysin type) with thrombospondin type 1 motif, 19 preproprotein                                                                                                     |
| XP_851676.1 | PREDICTED: similar to leiomodlin 3 (fetal)                                                                                                                                                                                           |



|             |                                                                                                                                                                                                                                                                        |
|-------------|------------------------------------------------------------------------------------------------------------------------------------------------------------------------------------------------------------------------------------------------------------------------|
| XP_851678.1 | PREDICTED: similar to CG10948-PC, isoform C                                                                                                                                                                                                                            |
| XP_851681.1 | PREDICTED: similar to Protein C14orf127 homolog                                                                                                                                                                                                                        |
| XP_851684.1 | PREDICTED: similar to Elongation factor 1-gamma (EF-1-gamma) (eEF-1B gamma) isoform 2                                                                                                                                                                                  |
| XP_851688.1 | PREDICTED: similar to CG30418-PA                                                                                                                                                                                                                                       |
| XP_851694.1 | PREDICTED: similar to aldehyde dehydrogenase 16 family, member A1 isoform 2                                                                                                                                                                                            |
| XP_851697.1 | PREDICTED: similar to calcium channel, voltage-dependent, beta 4 subunit isoform a                                                                                                                                                                                     |
| XP_851709.1 | PREDICTED: hypothetical protein XP_846616                                                                                                                                                                                                                              |
| XP_851712.1 | PREDICTED: similar to slingshot homolog 1 isoform 3                                                                                                                                                                                                                    |
| XP_851719.1 | PREDICTED: hypothetical protein XP_846626                                                                                                                                                                                                                              |
| XP_851721.1 | PREDICTED: similar to ring finger protein 111 isoform 3                                                                                                                                                                                                                |
| XP_851731.1 | PREDICTED: similar to C33H5.19                                                                                                                                                                                                                                         |
| XP_851732.1 | PREDICTED: similar to Gasdermin domain containing protein 1                                                                                                                                                                                                            |
| XP_851736.1 | PREDICTED: hypothetical protein XP_846643                                                                                                                                                                                                                              |
| XP_851742.1 | PREDICTED: similar to voltage-dependent anion channel 2 isoform 2                                                                                                                                                                                                      |
| XP_851743.1 | PREDICTED: similar to Heme oxygenase 2 (HO-2) isoform 2                                                                                                                                                                                                                |
| XP_851747.1 | PREDICTED: hypothetical protein XP_846654                                                                                                                                                                                                                              |
| XP_851751.1 | PREDICTED: similar to DnaJ homolog subfamily A member 3, mitochondrial precursor (Tumorous imaginal discs protein Tid56 homolog) (DnaJ protein Tid-1) (hTid-1) isoform 2                                                                                               |
| XP_851752.1 | PREDICTED: similar to Sulfotransferase 4A1 (Brain sulfotransferase-like protein) (hBR-STL) (hBR-STL-1) (Nervous system sulfotransferase) (NST)                                                                                                                         |
| XP_851754.1 | PREDICTED: similar to RIKEN cDNA 9130210N20                                                                                                                                                                                                                            |
| XP_851757.1 | PREDICTED: similar to translocation protein 1                                                                                                                                                                                                                          |
| XP_851762.1 | PREDICTED: similar to twinfilin isoform 1 isoform 2                                                                                                                                                                                                                    |
| XP_851765.1 | PREDICTED: similar to Tumor necrosis factor ligand superfamily member 11 (Receptor activator of nuclear factor kappa B ligand) (RANKL) (TNF-related activation-induced cytokine) (TRANCE) (Osteoprotegerin ligand) (OPGL) (Osteoclast differentiation factor) (ODF)... |
| XP_851774.1 | PREDICTED: similar to CG11156-PA                                                                                                                                                                                                                                       |
| XP_851775.1 | PREDICTED: similar to thyroid hormone receptor interactor 13                                                                                                                                                                                                           |
| XP_851777.1 | PREDICTED: similar to CREB-binding protein isoform 2                                                                                                                                                                                                                   |
| XP_851781.1 | PREDICTED: similar to A-kinase anchor protein 11 (Protein kinase A anchoring protein 11) (PKA11) (A kinase anchor protein 220 kDa) (AKAP 220) (hAKAP220)                                                                                                               |
| XP_851782.1 | PREDICTED: similar to serine/threonine kinase 35                                                                                                                                                                                                                       |
| XP_851783.1 | PREDICTED: similar to fibroblast growth factor 8 isoform E precursor                                                                                                                                                                                                   |
| XP_851792.1 | PREDICTED: similar to prostate tumor over expressed gene 1 (predicted)                                                                                                                                                                                                 |
| XP_851794.1 | PREDICTED: similar to NM23-H8                                                                                                                                                                                                                                          |
| XP_851799.1 | PREDICTED: similar to genetic suppressor element 1                                                                                                                                                                                                                     |
| XP_851806.1 | PREDICTED: similar to CG10947-PA, isoform A isoform 2                                                                                                                                                                                                                  |
| XP_851811.1 | PREDICTED: similar to DnaJ homolog, subfamily B, member 8                                                                                                                                                                                                              |
| XP_851813.1 | PREDICTED: hypothetical protein XP_846720                                                                                                                                                                                                                              |

|             |                                                                                                                                                                                                                          |
|-------------|--------------------------------------------------------------------------------------------------------------------------------------------------------------------------------------------------------------------------|
| XP_851817.1 | PREDICTED: similar to Tetraspanin-15 (Tspan-15) (Transmembrane 4 superfamily member 15) (Tetraspan NET-7)                                                                                                                |
| XP_851818.1 | PREDICTED: similar to Structural maintenance of chromosome 3 (Chondroitin sulfate proteoglycan 6) (Chromosome-associated polypeptide) (hCAP) (Bamacan) (Basement membrane-associated chondroitin proteoglycan) isoform 2 |
| XP_851820.1 | PREDICTED: similar to coactivator-associated arginine methyltransferase 1                                                                                                                                                |
| XP_851821.1 | PREDICTED: similar to signal peptide, CUB domain, EGF-like 1                                                                                                                                                             |
| XP_851832.1 | PREDICTED: similar to signal peptide-CUB domain-EGF-related 1                                                                                                                                                            |
| XP_851836.1 | PREDICTED: similar to V-FES feline sarcoma viral/V-FPS fujinami avian sarcoma viral oncogene homolog                                                                                                                     |
| XP_851846.1 | PREDICTED: similar to CUB and Sushi multiple domains 2                                                                                                                                                                   |
| XP_851852.1 | PREDICTED: similar to eukaryotic translation initiation factor 4A, isoform 1 isoform 2                                                                                                                                   |
| XP_851853.1 | PREDICTED: similar to Rho guanine nucleotide exchange factor (GEF) 17                                                                                                                                                    |
| XP_851855.1 | PREDICTED: similar to PAS domain containing serine/threonine-protein kinase (PAS-kinase) (PASKIN) (hPASK)                                                                                                                |
| XP_851858.1 | PREDICTED: similar to tripartite motif-containing 65                                                                                                                                                                     |
| XP_851866.1 | PREDICTED: similar to alanine aminotransferase 2                                                                                                                                                                         |
| XP_851871.1 | PREDICTED: similar to procollagen, type XIII, alpha 1                                                                                                                                                                    |
| XP_851876.1 | PREDICTED: similar to HIV-1 Rev binding protein 2 (Rev interacting protein 1) (Rip-1) isoform 2                                                                                                                          |
| XP_851879.1 | PREDICTED: similar to serologically defined breast cancer antigen 84 isoform a isoform 2                                                                                                                                 |
| XP_851895.1 | PREDICTED: similar to orthodenticle 2 isoform a isoform 2                                                                                                                                                                |
| XP_851898.1 | PREDICTED: hypothetical protein XP_846805                                                                                                                                                                                |
| XP_851907.1 | PREDICTED: hypothetical protein XP_846814                                                                                                                                                                                |
| XP_851909.1 | PREDICTED: similar to Septin-2 (NEDD5 protein homolog)                                                                                                                                                                   |
| XP_851910.1 | PREDICTED: similar to Toll-interleukin 1 receptor domain-containing adaptor protein isoform a                                                                                                                            |
| XP_851912.1 | PREDICTED: similar to vacuolar protein sorting 13C protein isoform 2B isoform 1                                                                                                                                          |
| XP_851923.1 | PREDICTED: similar to L-lactate dehydrogenase B chain (LDH-B) (LDH heart subunit) (LDH-H) isoform 2                                                                                                                      |
| XP_851926.1 | PREDICTED: similar to ash1 (absent, small, or homeotic)-like isoform 2                                                                                                                                                   |
| XP_851931.1 | PREDICTED: similar to cytoplasmic beta-actin                                                                                                                                                                             |
| XP_851933.1 | PREDICTED: similar to methionine adenosyltransferase I, alpha isoform 1                                                                                                                                                  |
| XP_851936.1 | PREDICTED: similar to cytoplasmic beta-actin                                                                                                                                                                             |
| XP_851940.1 | PREDICTED: similar to Nucleosome assembly protein 1-like 1 (NAP-1 related protein) (hNRP) isoform 2                                                                                                                      |
| XP_851941.1 | PREDICTED: similar to ribosomal protein L21                                                                                                                                                                              |
| XP_851947.1 | PREDICTED: similar to Growth hormone inducible transmembrane protein (Dermal papilla derived protein 2) isoform 3                                                                                                        |
| XP_851955.1 | PREDICTED: similar to pleckstrin homology domain containing, family G (with RhoGef domain) member 4                                                                                                                      |
| XP_851967.1 | PREDICTED: similar to eukaryotic translation elongation factor 1 alpha 1                                                                                                                                                 |
| XP_851976.1 | PREDICTED: similar to natural killer-tumor recognition sequence isoform a                                                                                                                                                |
| XP_851981.1 | PREDICTED: hypothetical protein XP_846888, partial                                                                                                                                                                       |
| XP_851989.1 | PREDICTED: similar to HpaII tiny fragments locus 9c (predicted)                                                                                                                                                          |
| XP_851997.1 | PREDICTED: similar to protein kinase, cGMP-dependent, type I                                                                                                                                                             |

|             |                                                                                                                                                                                           |
|-------------|-------------------------------------------------------------------------------------------------------------------------------------------------------------------------------------------|
| XP_851999.1 | PREDICTED: similar to glyceraldehyde-3-phosphate dehydrogenase                                                                                                                            |
| XP_852001.1 | PREDICTED: similar to putative MAPK activating protein PM20,PM21 isoform 1 isoform 1                                                                                                      |
| XP_852002.1 | PREDICTED: similar to KIAA0261 isoform 1                                                                                                                                                  |
| XP_852010.1 | PREDICTED: similar to Calpain-11 (Calcium-activated neutral proteinase 11) (CANP 11)                                                                                                      |
| XP_852013.1 | PREDICTED: hypothetical protein XP_846920                                                                                                                                                 |
| XP_852017.1 | PREDICTED: similar to Platelet glycoprotein IX precursor (GPIX) (CD42A)                                                                                                                   |
| XP_852020.1 | PREDICTED: similar to transmembrane protein 16F                                                                                                                                           |
| XP_852024.1 | PREDICTED: similar to Protein C9orf55 isoform 2                                                                                                                                           |
| XP_852028.1 | PREDICTED: similar to eukaryotic translation elongation factor 1 alpha 1                                                                                                                  |
| XP_852029.1 | PREDICTED: similar to CG3835-PA, isoform A                                                                                                                                                |
| XP_852040.1 | PREDICTED: similar to protocadherin 8 isoform 2 precursor                                                                                                                                 |
| XP_852046.1 | PREDICTED: similar to G1/S-specific cyclin D3 isoform 1                                                                                                                                   |
| XP_852047.1 | PREDICTED: similar to Tuberin (Tuberous sclerosis 2 homolog protein) isoform 2                                                                                                            |
| XP_852059.1 | PREDICTED: similar to ADAM 17 precursor (A disintegrin and metalloproteinase domain 17) (TNF-alpha converting enzyme) (TNF-alpha convertase) (Snake venom-like protease) (CD156b antigen) |
| XP_852060.1 | PREDICTED: similar to nuclear mitotic apparatus protein 1                                                                                                                                 |
| XP_852065.1 | PREDICTED: similar to stromal protein associated with thymii and lymph nodes isoform 2                                                                                                    |
| XP_852067.1 | PREDICTED: similar to long interspersed repetitive DNA sequence LINE4 (L1Rn)                                                                                                              |
| XP_852082.1 | PREDICTED: similar to polycystin-1L1                                                                                                                                                      |
| XP_852083.1 | PREDICTED: similar to armadillo repeat containing, X-linked 1                                                                                                                             |
| XP_852086.1 | PREDICTED: similar to dynamin 1-like isoform 2                                                                                                                                            |
| XP_852087.1 | PREDICTED: similar to GDNF family receptor alpha 1 precursor (GFR-alpha 1) (GDNF receptor alpha) (GDNFR-alpha) (TGF-beta related neurotrophic factor receptor 1) isoform 1                |
| XP_852103.1 | PREDICTED: similar to Neurexin-1-alpha precursor (Neurexin I-alpha) isoform 2                                                                                                             |
| XP_852113.1 | PREDICTED: similar to CG18659-PA, isoform A                                                                                                                                               |
| XP_852123.1 | PREDICTED: similar to putative aminopeptidase Fxna                                                                                                                                        |
| XP_852126.1 | PREDICTED: similar to midline 1                                                                                                                                                           |
| XP_852127.1 | PREDICTED: similar to Protein GPR155 (G-protein coupled receptor PGR22)                                                                                                                   |
| XP_852132.1 | PREDICTED: similar to Chemokine-like factor super family member 6                                                                                                                         |
| XP_852138.1 | PREDICTED: similar to ADAMTS-20 precursor (A disintegrin and metalloproteinase with thrombospondin motifs 20) (ADAM-TS 20) (ADAM-TS20)                                                    |
| XP_852141.1 | PREDICTED: similar to 5-nucleotidase, cytosolic III isoform 1 isoform 2                                                                                                                   |
| XP_852152.1 | PREDICTED: similar to Malonyl-CoA decarboxylase, mitochondrial precursor (MCD)                                                                                                            |
| XP_852154.1 | PREDICTED: similar to N-ethylmaleimide sensitive fusion protein attachment protein alpha isoform 1                                                                                        |
| XP_852169.1 | PREDICTED: similar to splicing factor, arginine/serine-rich 14 isoform 1                                                                                                                  |
| XP_852181.1 | PREDICTED: similar to importin 8 isoform 1                                                                                                                                                |
| XP_852182.1 | PREDICTED: similar to tropomyosin 1, alpha isoform 2                                                                                                                                      |

|             |                                                                                                                                                                                                                                                     |
|-------------|-----------------------------------------------------------------------------------------------------------------------------------------------------------------------------------------------------------------------------------------------------|
| XP_852185.1 | PREDICTED: similar to ADP-ribosylation-like factor 6 interacting protein 6                                                                                                                                                                          |
| XP_852186.1 | PREDICTED: similar to Nascent polypeptide-associated complex alpha subunit, muscle-specific form (Alpha-NAC, muscle-specific form), partial                                                                                                         |
| XP_852193.1 | PREDICTED: similar to synaptotagmin XIV                                                                                                                                                                                                             |
| XP_852196.1 | PREDICTED: similar to Mitochondrial inner membrane protein (Mitofilin) (p87/89) (Proliferation-inducing gene 4 protein) isoform 2                                                                                                                   |
| XP_852198.1 | PREDICTED: similar to Adapter-related protein complex 1 beta 1 subunit (Beta-adaptin 1) (Adaptor protein complex AP-1 beta-1 subunit) (Golgi adaptor HA1/AP1 adaptin beta subunit) (Clathrin assembly protein complex 1 beta large chain) isoform 3 |
| XP_852199.1 | PREDICTED: similar to Contactin-associated protein-like 3 precursor (Cell recognition molecule Caspr3)                                                                                                                                              |
| XP_852204.1 | PREDICTED: similar to ankyrin repeat domain 26, partial                                                                                                                                                                                             |
| XP_852205.1 | PREDICTED: similar to epsilon subunit of coatamer protein complex isoform 2                                                                                                                                                                         |
| XP_852210.1 | PREDICTED: similar to DNA-binding protein inhibitor ID-1 (Inhibitor of DNA binding 1)                                                                                                                                                               |
| XP_852227.1 | PREDICTED: similar to LIM and senescent cell antigen-like domains 2                                                                                                                                                                                 |
| XP_852228.1 | PREDICTED: similar to CG8465-PA, isoform A                                                                                                                                                                                                          |
| XP_852229.1 | PREDICTED: similar to solute carrier family 25, member 5                                                                                                                                                                                            |
| XP_852236.1 | PREDICTED: similar to Reticulon 4 (Neurite outgrowth inhibitor) (Nogo protein) (Foocen) (Neuroendocrine-specific protein) (NSP) (Neuroendocrine specific protein C homolog) (RTN-x) (Reticulon 5) isoform 3                                         |
| XP_852250.1 | PREDICTED: similar to PHD finger protein 20 isoform 3                                                                                                                                                                                               |
| XP_852252.1 | PREDICTED: similar to Interferon regulatory factor 4 (IRF-4) (Lymphocyte specific interferon regulatory factor) (LSIRF) (NF-EM5) (Multiple myeloma oncogene 1)                                                                                      |
| XP_852254.1 | PREDICTED: similar to glyceraldehyde-3-phosphate dehydrogenase                                                                                                                                                                                      |
| XP_852259.1 | PREDICTED: similar to parathyroid hormone-responsive B1 gene isoform 2 isoform 2                                                                                                                                                                    |
| XP_852263.1 | PREDICTED: hypothetical protein XP_847170                                                                                                                                                                                                           |
| XP_852265.1 | PREDICTED: hypothetical protein XP_847172                                                                                                                                                                                                           |
| XP_852266.1 | PREDICTED: similar to interferon-alpha receptor 1 precursor                                                                                                                                                                                         |
| XP_852282.1 | PREDICTED: similar to Ig kappa chain V-II region RPMI 6410 precursor, partial                                                                                                                                                                       |
| XP_852292.1 | PREDICTED: similar to Glyceraldehyde-3-phosphate dehydrogenase, liver (GAPDH)                                                                                                                                                                       |
| XP_852297.1 | PREDICTED: similar to mucin 19                                                                                                                                                                                                                      |
| XP_852302.1 | PREDICTED: similar to Serum response factor (SRF) isoform 2                                                                                                                                                                                         |
| XP_852312.1 | PREDICTED: similar to vesicle-associated membrane protein 8 isoform 2                                                                                                                                                                               |
| XP_852321.1 | PREDICTED: similar to Axin-1 (Axis inhibition protein 1) (Fused protein) isoform 2                                                                                                                                                                  |
| XP_852324.1 | PREDICTED: similar to ADP/ATP translocase 2 (Adenine nucleotide translocator 2) (ANT 2) (ADP,ATP carrier protein 2) (Solute carrier family 25, member 5) (ADP,ATP carrier protein, fibroblast isoform)                                              |
| XP_852332.1 | PREDICTED: similar to matrix metalloproteinase 17 preproprotein                                                                                                                                                                                     |
| XP_852334.1 | PREDICTED: hypothetical protein XP_847241                                                                                                                                                                                                           |
| XP_852338.1 | PREDICTED: similar to CG5271-PA                                                                                                                                                                                                                     |
| XP_852343.1 | PREDICTED: similar to InaD-like protein isoform 1 isoform 3                                                                                                                                                                                         |
| XP_852349.1 | PREDICTED: similar to arylsulfatase F precursor                                                                                                                                                                                                     |
| XP_852353.1 | PREDICTED: similar to Homeobox even-skipped homolog protein 2 (EVX-2)                                                                                                                                                                               |
| XP_852354.1 | PREDICTED: similar to forkhead box A1                                                                                                                                                                                                               |

|             |                                                                                                                                                                                                                                                                                                                                                 |
|-------------|-------------------------------------------------------------------------------------------------------------------------------------------------------------------------------------------------------------------------------------------------------------------------------------------------------------------------------------------------|
| XP_852368.1 | PREDICTED: similar to Glyceraldehyde-3-phosphate dehydrogenase, liver (GAPDH)                                                                                                                                                                                                                                                                   |
| XP_852383.1 | PREDICTED: similar to cAMP-specific 3,5-cyclic phosphodiesterase 4C (DPDE1) (PDE21)                                                                                                                                                                                                                                                             |
| XP_852389.1 | PREDICTED: similar to peptidylprolyl isomerase B precursor isoform 2                                                                                                                                                                                                                                                                            |
| XP_852390.1 | PREDICTED: similar to F59C6.12                                                                                                                                                                                                                                                                                                                  |
| XP_852401.1 | PREDICTED: similar to fucosyltransferase 11 (alpha (1,3) fucosyltransferase)                                                                                                                                                                                                                                                                    |
| XP_852406.1 | PREDICTED: similar to Phosphatidylinositol 3-kinase regulatory beta subunit (PI3-kinase p85-beta subunit) (PtdIns-3-kinase p85-beta)                                                                                                                                                                                                            |
| XP_852410.1 | PREDICTED: similar to CG12113-PA                                                                                                                                                                                                                                                                                                                |
| XP_852411.1 | PREDICTED: similar to engulfment and cell motility 1 isoform 1 isoform 1                                                                                                                                                                                                                                                                        |
| XP_852425.1 | PREDICTED: similar to dimerization cofactor of hepatocyte nuclear factor 1 (HNF1) from muscle                                                                                                                                                                                                                                                   |
| XP_852427.1 | PREDICTED: similar to nucleobindin 1                                                                                                                                                                                                                                                                                                            |
| XP_852429.1 | PREDICTED: similar to Homeobox protein Hox-D11 (Hox-4F)                                                                                                                                                                                                                                                                                         |
| XP_852438.1 | PREDICTED: similar to nuclear receptor binding SET domain protein 1 isoform b isoform 1                                                                                                                                                                                                                                                         |
| XP_852443.1 | PREDICTED: similar to Homeobox protein Hox-D9 (Hox-4.4) (Hox-5.2)                                                                                                                                                                                                                                                                               |
| XP_852458.1 | PREDICTED: similar to SLAM family member 7                                                                                                                                                                                                                                                                                                      |
| XP_852460.1 | PREDICTED: similar to tropomyosin 3 isoform 2 isoform 2                                                                                                                                                                                                                                                                                         |
| XP_852465.1 | PREDICTED: similar to heat shock protein 8                                                                                                                                                                                                                                                                                                      |
| XP_852469.1 | PREDICTED: similar to heat shock factor 2                                                                                                                                                                                                                                                                                                       |
| XP_852471.1 | PREDICTED: similar to guanine nucleotide binding protein (G protein), gamma 11                                                                                                                                                                                                                                                                  |
| XP_852477.1 | PREDICTED: similar to GREB1 protein isoform a                                                                                                                                                                                                                                                                                                   |
| XP_852482.1 | PREDICTED: hypothetical protein XP_847389                                                                                                                                                                                                                                                                                                       |
| XP_852488.1 | PREDICTED: similar to DnaJ homolog subfamily A member 1 (Heat shock 40 kDa protein 4) (DnaJ protein homolog 2) (HSJ-2) (HSDJ) isoform 2                                                                                                                                                                                                         |
| XP_852495.1 | PREDICTED: hypothetical protein XP_847402                                                                                                                                                                                                                                                                                                       |
| XP_852508.1 | PREDICTED: similar to caseinolytic protease X (E.coli) (predicted) isoform 1                                                                                                                                                                                                                                                                    |
| XP_852510.1 | PREDICTED: similar to bicaudal D homolog 1 isoform 1                                                                                                                                                                                                                                                                                            |
| XP_852521.1 | PREDICTED: similar to loop tail associated protein                                                                                                                                                                                                                                                                                              |
| XP_852523.1 | PREDICTED: similar to Histone H2B F (H2B 291A)                                                                                                                                                                                                                                                                                                  |
| XP_852534.1 | PREDICTED: hypothetical protein XP_847441                                                                                                                                                                                                                                                                                                       |
| XP_852536.1 | PREDICTED: similar to CG10222-PA isoform 1                                                                                                                                                                                                                                                                                                      |
| XP_852545.1 | PREDICTED: similar to RAB1B, member RAS oncogene family isoform 1<br>PREDICTED: similar to AT-rich interactive domain-containing protein 1A (ARID domain-containing protein 1A) (SWI/SNF-related, matrix-associated, actin-dependent regulator of chromatin subfamily F member 1) (SWI-SNF complex protein p270) (B120) (SWI-like)... isoform 1 |
| XP_852546.1 |                                                                                                                                                                                                                                                                                                                                                 |
| XP_852549.1 | PREDICTED: similar to Tumor protein p53 inducible nuclear protein 2 (Diabetes and obesity regulated protein)                                                                                                                                                                                                                                    |
| XP_852559.1 | PREDICTED: similar to B-cell novel protein 1                                                                                                                                                                                                                                                                                                    |
| XP_852564.1 | PREDICTED: similar to ubiquitin B precursor                                                                                                                                                                                                                                                                                                     |
| XP_852567.1 | PREDICTED: similar to smoothelin isoform a isoform 2                                                                                                                                                                                                                                                                                            |
| XP_852575.1 | PREDICTED: similar to CG1458-PA                                                                                                                                                                                                                                                                                                                 |

|             |                                                                                                                                                                                                                    |
|-------------|--------------------------------------------------------------------------------------------------------------------------------------------------------------------------------------------------------------------|
| XP_852578.1 | PREDICTED: similar to cleft lip and palate associated transmembrane protein 1 isoform 2                                                                                                                            |
| XP_852580.1 | PREDICTED: similar to glyceraldehyde-3-phosphate dehydrogenase                                                                                                                                                     |
| XP_852582.1 | PREDICTED: similar to 6-phosphogluconolactonase                                                                                                                                                                    |
| XP_852591.1 | PREDICTED: similar to CG17665-PA.3 isoform 1                                                                                                                                                                       |
| XP_852602.1 | PREDICTED: similar to transcription factor 23                                                                                                                                                                      |
| XP_852604.1 | PREDICTED: similar to Protein KIAA1219 isoform 1                                                                                                                                                                   |
| XP_852608.1 | PREDICTED: similar to cysteine-rich with EGF-like domains 1 isoform 2                                                                                                                                              |
| XP_852618.1 | PREDICTED: similar to heparan sulfate 6-O-sulfotransferase 2 isoform S isoform 2                                                                                                                                   |
| XP_852619.1 | PREDICTED: similar to Mitochondrial import receptor subunit TOM22 homolog (Translocase of outer membrane 22 kDa subunit homolog) (hTom22) (1C9-2)                                                                  |
| XP_852620.1 | PREDICTED: similar to interleukin 17 receptor C isoform 2 precursor                                                                                                                                                |
| XP_852629.1 | PREDICTED: similar to CG31019-PA                                                                                                                                                                                   |
| XP_852631.1 | PREDICTED: similar to centromere protein E                                                                                                                                                                         |
|             | PREDICTED: similar to Probable mitochondrial import receptor subunit TOM40 homolog (Translocase of outer membrane 40 kDa subunit homolog) (Haymaker protein) (p38.5) isoform 1                                     |
| XP_852633.1 |                                                                                                                                                                                                                    |
| XP_852634.1 | PREDICTED: similar to ring finger protein 185 isoform 2                                                                                                                                                            |
| XP_852640.1 | PREDICTED: similar to WW domain-binding protein 1 (WBP-1) isoform 2                                                                                                                                                |
| XP_852644.1 | PREDICTED: similar to Calcium-binding mitochondrial carrier protein Aralar2 (Mitochondrial aspartate glutamate carrier 2) (Solute carrier family 25, member 13) (Citrin)                                           |
| XP_852649.1 | PREDICTED: similar to BRCA1 interacting protein C-terminal helicase 1                                                                                                                                              |
| XP_852651.1 | PREDICTED: similar to Poliovirus receptor related protein 2 precursor (Herpes virus entry mediator B) (HveB) (Nectin 2) (CD112 antigen) isoform 2                                                                  |
| XP_852656.1 | PREDICTED: similar to lung cancer metastasis-related protein 1 homolog                                                                                                                                             |
| XP_852658.1 | PREDICTED: similar to Per-hexamer repeat protein 5                                                                                                                                                                 |
| XP_852674.1 | PREDICTED: similar to UPF0258 protein KIAA1024                                                                                                                                                                     |
|             | PREDICTED: similar to Carbonyl reductase [NADPH] 1 (NADPH-dependent carbonyl reductase 1) (Prostaglandin-E(2) 9-reductase) (Prostaglandin 9-ketoreductase) (15-hydroxyprostaglandin dehydrogenase [NADP+])         |
| XP_852675.1 |                                                                                                                                                                                                                    |
| XP_852679.1 | PREDICTED: similar to aftiphilin protein isoform a isoform 3                                                                                                                                                       |
| XP_852690.1 | PREDICTED: similar to sterol carrier protein 2 isoform 1 proprotein isoform 2                                                                                                                                      |
| XP_852696.1 | PREDICTED: similar to LIM domain kinase 2 (LIMK-2) isoform 2                                                                                                                                                       |
| XP_852700.1 | PREDICTED: similar to BAI1-associated protein 2-like 2                                                                                                                                                             |
| XP_852706.1 | PREDICTED: similar to Glycogen synthase kinase-3 alpha (GSK-3 alpha) isoform 2                                                                                                                                     |
| XP_852707.1 | PREDICTED: similar to actin-related protein 2 isoform a isoform 2                                                                                                                                                  |
| XP_852709.1 | PREDICTED: similar to Keratin, type II cytoskeletal 8 (Cytokeratin 8) (Cytokeratin endo A)                                                                                                                         |
|             | PREDICTED: similar to Proteasome subunit alpha type 1 (Proteasome component C2) (Macropain subunit C2) (Multicatalytic endopeptidase complex subunit C2) (Proteasome nu chain) (30 kDa prosomal protein) (PROS-30) |
| XP_852713.1 |                                                                                                                                                                                                                    |
| XP_852716.1 | PREDICTED: similar to ankyrin repeat, SAM and basic leucine zipper domain containing 1 isoform 1                                                                                                                   |
| XP_852718.1 | PREDICTED: similar to expressed in non-metastatic cells 1, protein (NM23A) (nucleoside diphosphate kinase)                                                                                                         |
| XP_852722.1 | PREDICTED: similar to CG16940-PA, isoform A                                                                                                                                                                        |
| XP_852726.1 | PREDICTED: similar to Glutamate dehydrogenase 1, mitochondrial precursor (GDH)                                                                                                                                     |

|             |                                                                                                                                                                                                                                                                            |
|-------------|----------------------------------------------------------------------------------------------------------------------------------------------------------------------------------------------------------------------------------------------------------------------------|
| XP_852727.1 | PREDICTED: similar to reticulon 4 receptor-like 2                                                                                                                                                                                                                          |
| XP_852734.1 | PREDICTED: similar to Ras protein-specific guanine nucleotide-releasing factor 2                                                                                                                                                                                           |
| XP_852742.1 | PREDICTED: similar to glyceraldehyde-3-phosphate dehydrogenase                                                                                                                                                                                                             |
| XP_852745.1 | PREDICTED: similar to serine/arginine repetitive matrix 1 isoform 2                                                                                                                                                                                                        |
| XP_852746.1 | PREDICTED: similar to ATP-binding cassette, sub-family C, member 9 isoform SUR2B isoform 2                                                                                                                                                                                 |
| XP_852760.1 | PREDICTED: similar to Stomatin-like protein 2 (SLP-2) (EPB72-like 2) isoform 2                                                                                                                                                                                             |
| XP_852761.1 | PREDICTED: similar to bromodomain-containing protein 4 isoform short isoform 3                                                                                                                                                                                             |
| XP_852764.1 | PREDICTED: similar to SLIT-ROBO Rho GTPase activating protein 3                                                                                                                                                                                                            |
| XP_852772.1 | PREDICTED: similar to Cocaine- and amphetamine-regulated transcript protein precursor                                                                                                                                                                                      |
| XP_852777.1 | PREDICTED: similar to Heat shock cognate 71 kDa protein (Heat shock 70 kDa protein 8)                                                                                                                                                                                      |
| XP_852778.1 | PREDICTED: similar to Muscblind-like protein (Triplet-expansion RNA-binding protein) isoform 2                                                                                                                                                                             |
| XP_852787.1 | PREDICTED: similar to thymosin, beta 4                                                                                                                                                                                                                                     |
| XP_852797.1 | PREDICTED: similar to Nucleosome assembly protein 1-like 1 (NAP-1 related protein) (hNRP)                                                                                                                                                                                  |
| XP_852800.1 | PREDICTED: similar to forkhead box D2                                                                                                                                                                                                                                      |
| XP_852816.1 | PREDICTED: hypothetical protein XP_847723                                                                                                                                                                                                                                  |
| XP_852819.1 | PREDICTED: hypothetical protein XP_847726                                                                                                                                                                                                                                  |
| XP_852832.1 | PREDICTED: similar to forkhead box E3                                                                                                                                                                                                                                      |
| XP_852835.1 | PREDICTED: similar to XK-related protein 9                                                                                                                                                                                                                                 |
| XP_852836.1 | PREDICTED: similar to Epididymis-specific alpha-mannosidase precursor (Mannosidase alpha class 2B member 2)                                                                                                                                                                |
| XP_852840.1 | PREDICTED: similar to Paired mesoderm homeobox protein 2B (Paired-like homeobox 2B) (PHOX2B homeodomain protein) (Neuroblastoma Phox) (NBPhox)                                                                                                                             |
| XP_852846.1 | PREDICTED: similar to spindle assembly associated Sfi1 homolog isoform a isoform 3                                                                                                                                                                                         |
| XP_852850.1 | PREDICTED: similar to Synaptic glycoprotein SC2 isoform 2                                                                                                                                                                                                                  |
| XP_852853.1 | PREDICTED: hypothetical protein XP_847760                                                                                                                                                                                                                                  |
| XP_852854.1 | PREDICTED: hypothetical protein XP_847761                                                                                                                                                                                                                                  |
| XP_852863.1 | PREDICTED: similar to titin isoform N2-B                                                                                                                                                                                                                                   |
| XP_852866.1 | PREDICTED: similar to pecanex-like 3 isoform 2                                                                                                                                                                                                                             |
| XP_852867.1 | PREDICTED: similar to Solute carrier organic anion transporter family, member 1C1 (Solute carrier family 21, member 14) (Organic anion transporter F) (OATP-F) (Organic anion transporting polypeptide 14) (Organic anion transporter polypeptide related protein 5... iso |
| XP_852868.1 | PREDICTED: similar to mitogen-activated protein kinase kinase 5 isoform A isoform 1                                                                                                                                                                                        |
| XP_852871.1 | PREDICTED: similar to TAL1 (SCL) interrupting locus                                                                                                                                                                                                                        |
| XP_852872.1 | PREDICTED: hypothetical protein XP_847779                                                                                                                                                                                                                                  |
| XP_852873.1 | PREDICTED: similar to glyceraldehyde-3-phosphate dehydrogenase                                                                                                                                                                                                             |
| XP_852884.1 | PREDICTED: similar to dystrobrevin binding protein 1 isoform a                                                                                                                                                                                                             |
| XP_852885.1 | PREDICTED: similar to insulin-like growth factor binding protein 5                                                                                                                                                                                                         |
| XP_852891.1 | PREDICTED: similar to ER-Golgi intermediate compartment 32 kDa protein (ERGIC-32) isoform 1                                                                                                                                                                                |
| XP_852899.1 | PREDICTED: similar to deleted in malignant brain tumors 1 isoform c precursor                                                                                                                                                                                              |

|             |                                                                                                                                                                                                                                            |
|-------------|--------------------------------------------------------------------------------------------------------------------------------------------------------------------------------------------------------------------------------------------|
| XP_852900.1 | PREDICTED: similar to DnaJ homolog subfamily B member 1 (Heat shock 40 kDa protein 1) (Heat shock protein 40) (HSP40) (DnaJ protein homolog 1) (HDJ-1) isoform 2                                                                           |
| XP_852902.1 | PREDICTED: similar to glucocorticoid induced transcript 1                                                                                                                                                                                  |
| XP_852912.1 | PREDICTED: similar to Glyceraldehyde-3-phosphate dehydrogenase (GAPDH)                                                                                                                                                                     |
| XP_852918.1 | PREDICTED: similar to calcium channel, voltage-dependent, alpha 2/delta subunit 1                                                                                                                                                          |
| XP_852919.1 | PREDICTED: similar to shugoshin-like 1 isoform A2                                                                                                                                                                                          |
| XP_852932.1 | PREDICTED: similar to PDZ domain containing 10                                                                                                                                                                                             |
| XP_852943.1 | PREDICTED: similar to Tropomyosin beta chain (Tropomyosin 2) (Beta-tropomyosin) isoform 3                                                                                                                                                  |
| XP_852947.1 | PREDICTED: similar to slit and trk like 4 protein isoform 2                                                                                                                                                                                |
| XP_852952.1 | PREDICTED: similar to breast cancer anti-estrogen resistance 1                                                                                                                                                                             |
| XP_852975.1 | PREDICTED: similar to Actin-binding LIM protein 2 (Actin-binding LIM protein family member 2) (abLIM2)                                                                                                                                     |
| XP_852983.1 | PREDICTED: similar to pentatricopeptide repeat domain 2                                                                                                                                                                                    |
| XP_852985.1 | PREDICTED: similar to Secreted phosphoprotein 24 precursor (Spp-24) (Secreted phosphoprotein 2)                                                                                                                                            |
| XP_852987.1 | PREDICTED: hypothetical protein XP_847894                                                                                                                                                                                                  |
| XP_853002.1 | PREDICTED: similar to DAB2 interacting protein isoform 2                                                                                                                                                                                   |
| XP_853008.1 | PREDICTED: similar to Protein C5orf5 (GAP-like protein N61)                                                                                                                                                                                |
| XP_853011.1 | PREDICTED: hypothetical protein XP_847918                                                                                                                                                                                                  |
| XP_853013.1 | PREDICTED: similar to ADP-ribosylation factor-like 10C                                                                                                                                                                                     |
| XP_853037.1 | PREDICTED: similar to immunoglobulin superfamily, member 4B                                                                                                                                                                                |
| XP_853041.1 | PREDICTED: similar to Neurogenic locus notch homolog protein 3 precursor (Notch 3)                                                                                                                                                         |
| XP_853049.1 | PREDICTED: similar to adenylate kinase 3                                                                                                                                                                                                   |
| XP_853057.1 | PREDICTED: similar to splicing factor, arginine/serine-rich 1 (ASF/SF2) isoform 1                                                                                                                                                          |
| XP_853069.1 | PREDICTED: similar to additional sex combs like 1 isoform 2                                                                                                                                                                                |
| XP_853074.1 | PREDICTED: similar to transmembrane protein 46                                                                                                                                                                                             |
| XP_853081.1 | PREDICTED: similar to ubiquitin-conjugating enzyme E2N (homologous to yeast UBC13)                                                                                                                                                         |
| XP_853085.1 | PREDICTED: similar to nuclear receptor co-repressor 2                                                                                                                                                                                      |
| XP_853086.1 | PREDICTED: similar to lipase A precursor                                                                                                                                                                                                   |
| XP_853091.1 | PREDICTED: similar to low density lipoprotein receptor-related protein 6 isoform 2                                                                                                                                                         |
| XP_853094.1 | PREDICTED: similar to Cytochrome P450 27, mitochondrial precursor (Cytochrome P-450C27/25) (Sterol 26-hydroxylase) (Sterol 27-hydroxylase) (Vitamin D(3) 25-hydroxylase) (5-beta-cholestane-3-alpha,7-alpha,12-alpha-triol 27-hydroxylase) |
| XP_853095.1 | PREDICTED: similar to retinoblastoma-associated factor 600 isoform 2                                                                                                                                                                       |
| XP_853098.1 | PREDICTED: hypothetical protein XP_848005                                                                                                                                                                                                  |
| XP_853116.1 | PREDICTED: similar to regulator of G-protein signalling like 2                                                                                                                                                                             |
| XP_853120.1 | PREDICTED: similar to Cyclin-dependent kinase 5 activator 2 precursor (CDK5 activator 2) (Cyclin-dependent kinase 5 regulatory subunit 2) (P39) (P39I)                                                                                     |
| XP_853130.1 | PREDICTED: similar to kinesin family member 13A                                                                                                                                                                                            |
| XP_853134.1 | PREDICTED: similar to DNA replication licensing factor MCM5 (CDC46 homolog) (P1-CDC46)                                                                                                                                                     |
| XP_853137.1 | PREDICTED: similar to myosin regulatory light chain-like                                                                                                                                                                                   |



|             |                                                                                                 |
|-------------|-------------------------------------------------------------------------------------------------|
| XP_853163.1 | PREDICTED: similar to CG33558-PA                                                                |
| XP_853166.1 | PREDICTED: similar to Protein C4orf008 homolog                                                  |
| XP_853168.1 | PREDICTED: similar to eukaryotic translation elongation factor 1 alpha 2 isoform 1              |
| XP_853170.1 | PREDICTED: similar to C9orf10 protein                                                           |
| XP_853171.1 | PREDICTED: similar to olfactory receptor 617                                                    |
| XP_853182.1 | PREDICTED: similar to doublecortin isoform a                                                    |
| XP_853184.1 | PREDICTED: similar to neurexin 2 isoform alpha-1 precursor isoform 2                            |
| XP_853192.1 | PREDICTED: hypothetical protein XP_848099                                                       |
| XP_853216.1 | PREDICTED: similar to B-cell receptor-associated protein 31                                     |
| XP_853218.1 | PREDICTED: similar to Protein KIAA0934                                                          |
| XP_853220.1 | PREDICTED: similar to NADH-ubiquinone oxidoreductase B9 subunit (Complex I-B9) (CI-B9)          |
| XP_853230.1 | PREDICTED: similar to neuregulin 3                                                              |
| XP_853232.1 | PREDICTED: similar to thyroid hormone receptor interactor 11                                    |
| XP_853235.1 | PREDICTED: similar to sushi domain containing 3                                                 |
| XP_853239.1 | PREDICTED: similar to MBD2 (methyl-CpG-binding protein)-interacting zinc finger protein         |
| XP_853241.1 | PREDICTED: similar to transient receptor protein 5                                              |
| XP_853243.1 | PREDICTED: similar to SET domain-containing protein 8                                           |
| XP_853253.1 | PREDICTED: similar to protein phosphatase 1E isoform 1                                          |
| XP_853258.1 | PREDICTED: similar to Cytochrome b561 (Cytochrome b-561)                                        |
| XP_853259.1 | PREDICTED: similar to CG32333-PA, isoform A isoform 2                                           |
| XP_853262.1 | PREDICTED: hypothetical protein XP_848169                                                       |
| XP_853265.1 | PREDICTED: similar to alpha 3 type VI collagen isoform 1 precursor                              |
| XP_853266.1 | PREDICTED: similar to zinc finger homeodomain 4                                                 |
| XP_853269.1 | PREDICTED: similar to tRNA-splicing endonuclease subunit Sen15 (tRNA-intron endonuclease Sen15) |
| XP_853279.1 | PREDICTED: similar to alpha 3 type VI collagen isoform 1 precursor                              |
| XP_853282.1 | PREDICTED: similar to DMRT-like family B with proline-rich C-terminal, 1                        |
| XP_853283.1 | PREDICTED: similar to phospholipase C, beta 3 (phosphatidylinositol-specific) isoform 2         |
| XP_853288.1 | PREDICTED: similar to HS1-binding protein 3                                                     |
| XP_853289.1 | PREDICTED: similar to alpha 3 type VI collagen isoform 1 precursor                              |
| XP_853294.1 | PREDICTED: similar to angiotensin I-converting enzyme                                           |
| XP_853298.1 | PREDICTED: similar to tripartite motif-containing 6 and tripartite motif-containing 34          |
| XP_853303.1 | PREDICTED: similar to Paf1, RNA polymerase II associated factor, homolog isoform 2              |
| XP_853304.1 | PREDICTED: similar to heat shock protein 8                                                      |
| XP_853309.1 | PREDICTED: similar to ARP3 actin-related protein 3 homolog                                      |
| XP_853318.1 | PREDICTED: similar to glyceraldehyde-3-phosphate dehydrogenase                                  |
| XP_853341.1 | PREDICTED: similar to potassium channel tetramerisation domain containing 8                     |

|             |                                                                                                                                                                                       |
|-------------|---------------------------------------------------------------------------------------------------------------------------------------------------------------------------------------|
| XP_853342.1 | PREDICTED: similar to TSPY-like 5                                                                                                                                                     |
| XP_853345.1 | PREDICTED: similar to Density-regulated protein (DRP) (DRP1 protein) (Smooth muscle cell associated protein-3) (SMAP-3)                                                               |
| XP_853353.1 | PREDICTED: similar to 26S proteasome non-ATPase regulatory subunit 5 (26S proteasome subunit S5B) (26S protease subunit S5 basic)                                                     |
| XP_853360.1 | PREDICTED: similar to neurogenin 2                                                                                                                                                    |
| XP_853361.1 | PREDICTED: similar to ATP synthase, H <sup>+</sup> transporting, mitochondrial F0 complex, subunit c, isoform 1                                                                       |
| XP_853376.1 | PREDICTED: similar to U3 small nucleolar ribonucleoprotein protein IMP3 (U3 snoRNP protein IMP3) (BRMS2)                                                                              |
| XP_853384.1 | PREDICTED: similar to macrophage erythroblast attacher (predicted)                                                                                                                    |
| XP_853387.1 | PREDICTED: similar to Electron transfer flavoprotein alpha-subunit, mitochondrial precursor (Alpha-ETF) isoform 1                                                                     |
| XP_853391.1 | PREDICTED: similar to asp (abnormal spindle)-like, microcephaly associated                                                                                                            |
| XP_853394.1 | PREDICTED: similar to Ia related protein isoform 1                                                                                                                                    |
|             | PREDICTED: similar to Sodium channel protein type IV alpha subunit (Voltage-gated sodium channel alpha subunit Nav1.4) (Sodium channel protein, skeletal muscle alpha-subunit) (SkM1) |
| XP_853396.1 |                                                                                                                                                                                       |
| XP_853398.1 | PREDICTED: similar to Glutamate receptor 1 precursor (GluR-1) (GluR-A) (GluR-K1) (Glutamate receptor ionotropic, AMPA 1) isoform 2                                                    |
| XP_853400.1 | PREDICTED: similar to brain-specific angiogenesis inhibitor 1-associated protein 2                                                                                                    |
| XP_853413.1 | PREDICTED: hypothetical protein XP_848320                                                                                                                                             |
| XP_853418.1 | PREDICTED: similar to Prostaglandin E2 receptor, EP1 subtype (Prostanoid EP1 receptor) (PGE receptor, EP1 subtype)                                                                    |
| XP_853425.1 | PREDICTED: similar to protocadherin 21 precursor                                                                                                                                      |
| XP_853427.1 | PREDICTED: similar to LINE-1 reverse transcriptase homolog                                                                                                                            |
| XP_853432.1 | PREDICTED: similar to Thioredoxin domain containing protein 1 precursor (Transmembrane Trx-related protein) (Thioredoxin-related transmembrane protein)                               |
| XP_853434.1 | PREDICTED: similar to Protein C20orf43 isoform 1                                                                                                                                      |
| XP_853443.1 | PREDICTED: similar to zinc finger protein 398 isoform 1                                                                                                                               |
| XP_853453.1 | PREDICTED: similar to POU domain, class 4, transcription factor 2 (Brain-specific homeobox/POU domain protein 3B) (Brn-3B) isoform 3                                                  |
| XP_853469.1 | PREDICTED: similar to dnaj-like protein isoform 2                                                                                                                                     |
| XP_853474.1 | PREDICTED: similar to CDW92 antigen isoform 2 isoform 2                                                                                                                               |
| XP_853477.1 | PREDICTED: similar to Signal recognition particle receptor beta subunit (SR-beta) (Protein APMCF1)                                                                                    |
| XP_853488.1 | PREDICTED: similar to Methyl-CpG-binding protein 2 (MeCP-2 protein) (MeCP2) isoform 1                                                                                                 |
| XP_853495.1 | PREDICTED: hypothetical protein XP_848402                                                                                                                                             |
| XP_853503.1 | PREDICTED: similar to retinal degeneration B beta                                                                                                                                     |
| XP_853506.1 | PREDICTED: hypothetical protein XP_848413                                                                                                                                             |
| XP_853511.1 | PREDICTED: similar to Transmembrane 7 superfamily member 1                                                                                                                            |
| XP_853517.1 | PREDICTED: similar to USP6 N-terminal like                                                                                                                                            |
| XP_853522.1 | PREDICTED: similar to tubulin, alpha 1                                                                                                                                                |
| XP_853523.1 | PREDICTED: similar to LPS-responsive vesicle trafficking, beach and anchor containing isoform 2                                                                                       |
| XP_853529.1 | PREDICTED: similar to junctophilin 2 isoform 1                                                                                                                                        |
| XP_853540.1 | PREDICTED: similar to CG1814-PB, isoform B                                                                                                                                            |
| XP_853544.1 | PREDICTED: hypothetical protein XP_848451                                                                                                                                             |

|             |                                                                                                                                                                                                                                                                         |
|-------------|-------------------------------------------------------------------------------------------------------------------------------------------------------------------------------------------------------------------------------------------------------------------------|
| XP_853545.1 | PREDICTED: similar to Myosin-6 (Myosin VI) isoform 2                                                                                                                                                                                                                    |
| XP_853546.1 | PREDICTED: similar to collagen, type XXV, alpha 1 isoform 1                                                                                                                                                                                                             |
| XP_853547.1 | PREDICTED: similar to G2/mitotic-specific cyclin F                                                                                                                                                                                                                      |
| XP_853549.1 | PREDICTED: similar to GTPase, IMAP family member 8                                                                                                                                                                                                                      |
| XP_853553.1 | PREDICTED: similar to Ubiquitin-associated protein 1                                                                                                                                                                                                                    |
| XP_853583.1 | PREDICTED: similar to zinc finger protein 91 (HPF7, HTF10)                                                                                                                                                                                                              |
| XP_853587.1 | PREDICTED: similar to zinc finger protein 91 (HPF7, HTF10)                                                                                                                                                                                                              |
| XP_853593.1 | PREDICTED: similar to ATP synthase alpha chain, mitochondrial precursor                                                                                                                                                                                                 |
| XP_853595.1 | PREDICTED: similar to Anosmin 1 precursor (Kallmann syndrome protein) (Adhesion molecule-like X-linked)                                                                                                                                                                 |
| XP_853616.1 | PREDICTED: hypothetical protein XP_848523                                                                                                                                                                                                                               |
| XP_853625.1 | PREDICTED: similar to Vacuolar ATP synthase subunit S1 precursor (V-ATPase S1 subunit) (V-ATPase S1 accessory protein) (V-ATPase Ac45 subunit) (XAP-3) isoform 1                                                                                                        |
| XP_853628.1 | PREDICTED: similar to Aldehyde dehydrogenase, mitochondrial precursor (ALDH class 2) (ALDH1) (ALDH-E2)                                                                                                                                                                  |
| XP_853629.1 | PREDICTED: similar to CG8233-PC, isoform C                                                                                                                                                                                                                              |
| XP_853630.1 | PREDICTED: similar to cytochrome b5 outer mitochondrial membrane precursor                                                                                                                                                                                              |
| XP_853632.1 | PREDICTED: hypothetical protein XP_848539                                                                                                                                                                                                                               |
| XP_853634.1 | PREDICTED: similar to Calpain small subunit 1 (CSS1) (Calcium-dependent protease small subunit 1) (Calcium-dependent protease small subunit) (CDPS) (Calpain regulatory subunit) (Calcium-activated neutral proteinase small subunit) (CANP small subunit)... isoform 1 |
|             | PREDICTED: similar to NHP2-like protein 1 (High mobility group-like nuclear protein 2 homolog 1) ([U4/U6.U5] tri-snRNP 15.5 kDa protein) (Sperm specific antigen 1) (Fertilization antigen 1) (FA-1)                                                                    |
| XP_853639.1 |                                                                                                                                                                                                                                                                         |
| XP_853644.1 | PREDICTED: similar to zinc finger protein 91 (HPF7, HTF10)                                                                                                                                                                                                              |
| XP_853653.1 | PREDICTED: similar to bromodomain containing 3                                                                                                                                                                                                                          |
| XP_853655.1 | PREDICTED: similar to regulator of G-protein signalling 3 isoform 3 isoform 1                                                                                                                                                                                           |
| XP_853659.1 | PREDICTED: hypothetical protein XP_848566                                                                                                                                                                                                                               |
| XP_853670.1 | PREDICTED: similar to casein kinase 1, alpha 1 isoform 1 isoform 2                                                                                                                                                                                                      |
| XP_853673.1 | PREDICTED: similar to Glyceraldehyde-3-phosphate dehydrogenase (GAPDH)                                                                                                                                                                                                  |
| XP_853680.1 | PREDICTED: similar to Transcription factor Sp8                                                                                                                                                                                                                          |
| XP_853693.1 | PREDICTED: similar to family with sequence similarity 19 (chemokine (C-C motif)-like), member A4                                                                                                                                                                        |
| XP_853696.1 | PREDICTED: similar to Temporarily Assigned Gene name family member (tag-262) isoform 1                                                                                                                                                                                  |
| XP_853697.1 | PREDICTED: similar to 60S ribosomal protein L21                                                                                                                                                                                                                         |
| XP_853706.1 | PREDICTED: similar to sorting nexin associated golgi protein 1 isoform 1                                                                                                                                                                                                |
| XP_853713.1 | PREDICTED: similar to L-lactate dehydrogenase B chain (LDH-B) (LDH heart subunit) (LDH-H) isoform 1                                                                                                                                                                     |
| XP_853716.1 | PREDICTED: similar to FLJ44048 protein                                                                                                                                                                                                                                  |
| XP_853717.1 | PREDICTED: similar to Ferritin light chain 1 (Ferritin L subunit 1)                                                                                                                                                                                                     |
| XP_853721.1 | PREDICTED: similar to Insulin gene enhancer protein ISL-1 (Islet-1) isoform 1                                                                                                                                                                                           |
| XP_853725.1 | PREDICTED: similar to DAZ interacting protein 1-like                                                                                                                                                                                                                    |
| XP_853728.1 | PREDICTED: similar to synaptopodin 2                                                                                                                                                                                                                                    |

|             |                                                                                                                                                                                                                                 |
|-------------|---------------------------------------------------------------------------------------------------------------------------------------------------------------------------------------------------------------------------------|
| XP_853733.1 | PREDICTED: similar to dachsous 1 precursor                                                                                                                                                                                      |
| XP_853735.1 | PREDICTED: similar to Opsin-4 (Melanopsin)                                                                                                                                                                                      |
| XP_853738.1 | PREDICTED: similar to Fibrinogen beta chain precursor isoform 2                                                                                                                                                                 |
| XP_853739.1 | PREDICTED: similar to SWI/SNF-related matrix-associated actin-dependent regulator of chromatin a4 isoform 2                                                                                                                     |
| XP_853752.1 | PREDICTED: similar to Fibrinogen gamma chain precursor isoform 2                                                                                                                                                                |
| XP_853754.1 | PREDICTED: similar to rabphilin 3A homolog                                                                                                                                                                                      |
| XP_853780.1 | PREDICTED: similar to T-complex protein 1, zeta subunit (TCP-1-zeta) (CCT-zeta) (CCT-zeta-1)                                                                                                                                    |
| XP_853787.1 | PREDICTED: similar to myelin associated glycoprotein isoform a precursor isoform 1                                                                                                                                              |
| XP_853796.1 | PREDICTED: similar to cystathionine-beta-synthase                                                                                                                                                                               |
| XP_853805.1 | PREDICTED: similar to CG8800-PA isoform 1                                                                                                                                                                                       |
| XP_853806.1 | PREDICTED: similar to myeloid/lymphoid or mixed-lineage leukemia 3 isoform 1                                                                                                                                                    |
| XP_853818.1 | PREDICTED: similar to Laminin alpha-5 chain precursor, partial                                                                                                                                                                  |
| XP_853819.1 | PREDICTED: similar to tubulin, alpha 1                                                                                                                                                                                          |
| XP_853828.1 | PREDICTED: similar to splicing factor 3a, subunit 3 (predicted)                                                                                                                                                                 |
| XP_853842.1 | PREDICTED: similar to ankyrin repeat domain 6 isoform 3                                                                                                                                                                         |
| XP_853855.1 | PREDICTED: similar to deleted in malignant brain tumors 1 isoform c precursor                                                                                                                                                   |
| XP_853869.1 | PREDICTED: similar to vacuolar protein sorting 13D isoform 1                                                                                                                                                                    |
| XP_853870.1 | PREDICTED: similar to A-kinase anchor protein 3 (Protein kinase A anchoring protein 3) (PRKA3) (A-kinase anchor protein 110 kDa) (AKAP 110) (Sperm oocyte binding protein) (Fibrous sheath protein of 95 kDa) (FSP95) isoform 2 |
| XP_853872.1 | PREDICTED: similar to Thioredoxin-dependent peroxide reductase, mitochondrial precursor (Peroxioredoxin 3) (Antioxidant protein 1) (AOP-1) (MER5 protein homolog) (HBC189) (PRX III)                                            |
| XP_853873.1 | PREDICTED: hypothetical protein XP_848780                                                                                                                                                                                       |
| XP_853888.1 | PREDICTED: similar to heat shock 70kD protein binding protein                                                                                                                                                                   |
| XP_853891.1 | PREDICTED: similar to Oligodendrocyte-myelin glycoprotein precursor                                                                                                                                                             |
| XP_853893.1 | PREDICTED: similar to Limbin                                                                                                                                                                                                    |
| XP_853899.1 | PREDICTED: similar to nucleoredoxin                                                                                                                                                                                             |
| XP_853900.1 | PREDICTED: similar to Dedicator of cytokinesis protein 6                                                                                                                                                                        |
| XP_853901.1 | PREDICTED: similar to deleted in malignant brain tumors 1 isoform b precursor                                                                                                                                                   |
| XP_853902.1 | PREDICTED: similar to Ellis-van Creveld syndrome protein (DWF-1)                                                                                                                                                                |
| XP_853903.1 | PREDICTED: similar to histone 1, H2ai (predicted)                                                                                                                                                                               |
| XP_853904.1 | PREDICTED: similar to Bone morphogenetic protein 3b precursor (BMP-3b) (Growth/differentiation factor 10) (GDF-10) (Bone inducing protein) (BIP)                                                                                |
| XP_853907.1 | PREDICTED: similar to CG13648-PA                                                                                                                                                                                                |
| XP_853908.1 | PREDICTED: similar to dpy-19-like 3 isoform 1                                                                                                                                                                                   |
| XP_853912.1 | PREDICTED: similar to deleted in malignant brain tumors 1 isoform a precursor                                                                                                                                                   |
| XP_853915.1 | PREDICTED: similar to mitochondrial ribosomal protein L33                                                                                                                                                                       |
| XP_853918.1 | PREDICTED: hypothetical protein XP_848825                                                                                                                                                                                       |

|             |                                                                                                                                                                                                           |
|-------------|-----------------------------------------------------------------------------------------------------------------------------------------------------------------------------------------------------------|
| XP_853924.1 | PREDICTED: similar to latent transforming growth factor beta binding protein 2 isoform 2                                                                                                                  |
| XP_853926.1 | PREDICTED: similar to G protein-coupled receptor 97                                                                                                                                                       |
| XP_853928.1 | PREDICTED: similar to phospholipase B                                                                                                                                                                     |
| XP_853929.1 | PREDICTED: hypothetical protein XP_848836                                                                                                                                                                 |
| XP_853936.1 | PREDICTED: similar to zinc finger protein 444                                                                                                                                                             |
| XP_853939.1 | PREDICTED: similar to Colorectal mutant cancer protein (MCC protein)                                                                                                                                      |
| XP_853947.1 | PREDICTED: similar to NACHT, leucine rich repeat and PYD containing 8                                                                                                                                     |
| XP_853948.1 | PREDICTED: similar to basonuclin 2                                                                                                                                                                        |
| XP_853949.1 | PREDICTED: similar to zinc finger protein 25                                                                                                                                                              |
| XP_853953.1 | PREDICTED: similar to Kinase suppressor of ras-1 (Kinase suppressor of ras) isoform 1                                                                                                                     |
| XP_853957.1 | PREDICTED: similar to KIAA1946                                                                                                                                                                            |
| XP_853958.1 | PREDICTED: similar to tubulin, alpha 1                                                                                                                                                                    |
| XP_853969.1 | PREDICTED: similar to PDZ domain containing 10                                                                                                                                                            |
| XP_853978.1 | PREDICTED: similar to Homeobox protein HMX3 (Homeobox protein Nkx-5.1)                                                                                                                                    |
| XP_853989.1 | PREDICTED: similar to Zinc finger protein 581                                                                                                                                                             |
| XP_853995.1 | PREDICTED: similar to EH-domain containing protein 3                                                                                                                                                      |
| XP_853998.1 | PREDICTED: similar to TNFRSF1A-associated via death domain isoform 1                                                                                                                                      |
| XP_853999.1 | PREDICTED: similar to Glyceraldehyde-3-phosphate dehydrogenase, liver (GAPDH)                                                                                                                             |
| XP_854000.1 | PREDICTED: similar to alpha-2-plasmin inhibitor                                                                                                                                                           |
| XP_854002.1 | PREDICTED: similar to LW glycoprotein                                                                                                                                                                     |
| XP_854003.1 | PREDICTED: similar to Alpha-2-antiplasmin precursor (Alpha-2-plasmin inhibitor) (Alpha-2-PI) (Alpha-2-AP)                                                                                                 |
| XP_854012.1 | PREDICTED: similar to Prion-like-(Q/N-rich)-domain-bearing protein family member (pqn-75)                                                                                                                 |
| XP_854015.1 | PREDICTED: similar to queueine tRNA-ribosyltransferase 1 (tRNA-guanine transglycosylase) isoform 1                                                                                                        |
| XP_854016.1 | PREDICTED: similar to Histidyl-tRNA synthetase (Histidine--tRNA ligase) (HisRS)                                                                                                                           |
| XP_854036.1 | PREDICTED: similar to DnaJ homolog subfamily A member 2 (RDJ2)                                                                                                                                            |
| XP_854038.1 | PREDICTED: similar to retinoid x receptor interacting protein                                                                                                                                             |
| XP_854039.1 | PREDICTED: similar to glyceraldehyde-3-phosphate dehydrogenase                                                                                                                                            |
| XP_854047.1 | PREDICTED: similar to ZC13.1b                                                                                                                                                                             |
| XP_854051.1 | PREDICTED: similar to high mobility group nucleosomal binding domain 3 isoform HMGN3a                                                                                                                     |
| XP_854052.1 | PREDICTED: similar to Baculoviral IAP repeat-containing protein 6 (Ubiquitin-conjugating BIR-domain enzyme apollon)                                                                                       |
| XP_854054.1 | PREDICTED: similar to bruno-like 6, RNA binding protein                                                                                                                                                   |
| XP_854057.1 | PREDICTED: similar to Activator of apoptosis harakiri (Neuronal death protein DP5) (BH3 interacting domain protein 3)                                                                                     |
| XP_854067.1 | PREDICTED: similar to ES1 protein homolog, mitochondrial precursor (Protein KNP-I) (GT335 protein)                                                                                                        |
| XP_854070.1 | PREDICTED: similar to Dipeptidyl aminopeptidase-like protein 6 (Dipeptidylpeptidase VI) (Dipeptidylpeptidase 6) (Dipeptidyl peptidase IV like protein) (Dipeptidyl aminopeptidase-related protein) (DPPX) |
| XP_854071.1 | PREDICTED: similar to diacylglycerol kinase zeta                                                                                                                                                          |

|             |                                                                                                                                                                                                                           |
|-------------|---------------------------------------------------------------------------------------------------------------------------------------------------------------------------------------------------------------------------|
| XP_854080.1 | PREDICTED: similar to CG32699-PA                                                                                                                                                                                          |
| XP_854083.1 | PREDICTED: similar to Glyceraldehyde-3-phosphate dehydrogenase (GAPDH)                                                                                                                                                    |
| XP_854088.1 | PREDICTED: similar to histone 1, H2ai (predicted)                                                                                                                                                                         |
| XP_854093.1 | PREDICTED: similar to germinal histone H4 gene                                                                                                                                                                            |
| XP_854097.1 | PREDICTED: similar to Neuromedin U-25 precursor (NmU-25)                                                                                                                                                                  |
| XP_854099.1 | PREDICTED: similar to Mitochondrial import inner membrane translocase subunit TIM8 B (Deafness dystonia protein 2) (DDP-like protein)                                                                                     |
| XP_854103.1 | PREDICTED: similar to Hsp90 co-chaperone Cdc37 (Hsp90 chaperone protein kinase-targeting subunit) (p50Cdc37) isoform 2                                                                                                    |
| XP_854121.1 | PREDICTED: similar to Homeobox protein engrailed-2 (Mo-En-2)                                                                                                                                                              |
| XP_854144.1 | PREDICTED: similar to zinc finger protein 79 (pT7)                                                                                                                                                                        |
| XP_854155.1 | PREDICTED: similar to Fructose-bisphosphate aldolase A (Muscle-type aldolase) (Lung cancer antigen NY-LU-1) isoform 1                                                                                                     |
| XP_854158.1 | PREDICTED: similar to chromosome 11 open reading frame 17                                                                                                                                                                 |
| XP_854163.1 | PREDICTED: similar to Sulfotransferase 6B1                                                                                                                                                                                |
| XP_854167.1 | PREDICTED: similar to Activating signal cointegrator 1 complex subunit 3 (ASC-1 complex subunit p200) (Trip4 complex subunit p200) (Helicase, ATP binding 1) isoform 2                                                    |
| XP_854177.1 | PREDICTED: similar to DNA-directed RNA polymerase II 7.6 kDa polypeptide (RPB10) (RPB7.6) (RPABC5)                                                                                                                        |
| XP_854178.1 | PREDICTED: similar to Olfactory receptor 7G1 (Olfactory receptor 19-15) (OR19-15)                                                                                                                                         |
| XP_854183.1 | PREDICTED: similar to CDC42 effector protein 5                                                                                                                                                                            |
| XP_854188.1 | PREDICTED: hypothetical protein XP_849095                                                                                                                                                                                 |
| XP_854189.1 | PREDICTED: similar to Cytochrome b5                                                                                                                                                                                       |
| XP_854193.1 | PREDICTED: similar to Neighbor of COX4                                                                                                                                                                                    |
| XP_854201.1 | PREDICTED: similar to Mucin-2 precursor (Intestinal mucin 2)                                                                                                                                                              |
| XP_854215.1 | PREDICTED: hypothetical protein XP_849122                                                                                                                                                                                 |
| XP_854216.1 | PREDICTED: similar to Alpha-2-macroglobulin precursor (Alpha-2-M)                                                                                                                                                         |
| XP_854220.1 | PREDICTED: similar to pregnancy-zone protein                                                                                                                                                                              |
| XP_854222.1 | PREDICTED: similar to pleckstrin homology domain containing, family G, member 3                                                                                                                                           |
| XP_854223.1 | PREDICTED: similar to chromosome 21 open reading frame 29                                                                                                                                                                 |
| XP_854224.1 | PREDICTED: similar to tripartite motif protein 32                                                                                                                                                                         |
| XP_854225.1 | PREDICTED: similar to myosin 18A isoform a isoform 2                                                                                                                                                                      |
| XP_854231.1 | PREDICTED: similar to Fructose-bisphosphate aldolase A (Muscle-type aldolase) (Lung cancer antigen NY-LU-1)                                                                                                               |
| XP_854235.1 | PREDICTED: similar to Alpha enolase (2-phospho-D-glycerate hydro-lyase) (Non-neural enolase) (NNE) (Enolase 1) (Phosphopyruvate hydratase) (C-myc promoter-binding protein) (MBP-1) (MPB-1) (Plasminogen-binding protein) |
| XP_854236.1 | PREDICTED: similar to LINE-1 reverse transcriptase homolog                                                                                                                                                                |
| XP_854237.1 | PREDICTED: similar to Glutamate dehydrogenase 1, mitochondrial precursor (GDH) (Memory related protein-2) (MRG-2)                                                                                                         |
| XP_854240.1 | PREDICTED: similar to RAB35, member RAS oncogene family (predicted)                                                                                                                                                       |
| XP_854246.1 | PREDICTED: similar to keratin 8                                                                                                                                                                                           |
| XP_854250.1 | PREDICTED: similar to PRKC, apoptosis, WT1, regulator                                                                                                                                                                     |
| XP_854251.1 | PREDICTED: similar to Rho-specific guanine nucleotide exchange factor p114                                                                                                                                                |

|             |                                                                                                                                                                                                                                                                  |
|-------------|------------------------------------------------------------------------------------------------------------------------------------------------------------------------------------------------------------------------------------------------------------------|
| XP_854252.1 | PREDICTED: similar to musashi 1                                                                                                                                                                                                                                  |
| XP_854260.1 | PREDICTED: similar to Phospholipid scramblase 4 (PL scramblase 4) (Ca(2+)-dependent phospholipid scramblase 4)                                                                                                                                                   |
| XP_854262.1 | PREDICTED: similar to Apelin precursor (APJ endogenous ligand)                                                                                                                                                                                                   |
| XP_854263.1 | PREDICTED: similar to methylenetetrahydrofolate dehydrogenase (NADP+ dependent), methenyltetrahydrofolate cyclohydrolase, formyltetrahydrofolate synthase                                                                                                        |
| XP_854266.1 | PREDICTED: similar to zinc finger protein of the cerebellum 5                                                                                                                                                                                                    |
| XP_854270.1 | PREDICTED: similar to heterogeneous nuclear ribonucleoprotein M isoform a isoform 2                                                                                                                                                                              |
| XP_854275.1 | PREDICTED: hypothetical protein XP_849182                                                                                                                                                                                                                        |
| XP_854287.1 | PREDICTED: similar to histone 1, H2ai (predicted)                                                                                                                                                                                                                |
| XP_854291.1 | PREDICTED: similar to myeloid-associated differentiation marker                                                                                                                                                                                                  |
| XP_854292.1 | PREDICTED: similar to otogelin                                                                                                                                                                                                                                   |
| XP_854302.1 | PREDICTED: similar to Unc119c                                                                                                                                                                                                                                    |
| XP_854310.1 | PREDICTED: similar to Interferon-inducible protein                                                                                                                                                                                                               |
| XP_854311.1 | PREDICTED: similar to C-type lectin superfamily member 9 (Macrophage-inducible C-type lectin)                                                                                                                                                                    |
| XP_854313.1 | PREDICTED: similar to Resistin precursor (Cysteine-rich secreted protein FIZZ3) (Adipose tissue-specific secretory factor) (ADSF) (C/EBP-epsilon regulated myeloid-specific secreted cysteine-rich protein) (Cysteine-rich secreted protein A12-alpha-like 2)... |
| XP_854323.1 | PREDICTED: similar to Synaptotagmin-8 (Synaptotagmin VIII) (SytVIII)                                                                                                                                                                                             |
| XP_854333.1 | PREDICTED: similar to tubulin, alpha 1                                                                                                                                                                                                                           |
| XP_854337.1 | PREDICTED: similar to DnaJ-like protein 2                                                                                                                                                                                                                        |
| XP_854346.1 | PREDICTED: similar to ATP synthase alpha chain, mitochondrial precursor                                                                                                                                                                                          |
| XP_854347.1 | PREDICTED: similar to 60S ribosomal protein L26-like 1                                                                                                                                                                                                           |
| XP_854355.1 | PREDICTED: similar to ribosomal protein L4                                                                                                                                                                                                                       |
| XP_854357.1 | PREDICTED: similar to FLJ44048 protein                                                                                                                                                                                                                           |
| XP_854358.1 | PREDICTED: similar to 14-3-3 protein epsilon (14-3-3E) (Mitochondrial import stimulation factor L subunit) (MSF L) isoform 2                                                                                                                                     |
| XP_854359.1 | PREDICTED: similar to zinc finger protein 43 (HTF6)                                                                                                                                                                                                              |
| XP_854360.1 | PREDICTED: similar to AF4/FMR2 family, member 3 isoform 2                                                                                                                                                                                                        |
| XP_854369.1 | PREDICTED: similar to forkhead box I2                                                                                                                                                                                                                            |
| XP_854370.1 | PREDICTED: similar to F-box only protein 37 (F-box/LRR-repeat protein 15)                                                                                                                                                                                        |
| XP_854372.1 | PREDICTED: similar to N-methylpurine-DNA glycosylase isoform b                                                                                                                                                                                                   |
| XP_854374.1 | PREDICTED: similar to Zinc finger protein 85 (Zinc finger protein HPF4) (HTF1)                                                                                                                                                                                   |
| XP_854383.1 | PREDICTED: similar to Integrin beta-2 precursor (Cell surface adhesion glycoproteins LFA-1/CR3/p150,95 beta-subunit) (CD18) (Complement receptor C3 beta-subunit)                                                                                                |
| XP_854389.1 | PREDICTED: similar to leucine-rich B7 protein isoform 1                                                                                                                                                                                                          |
| XP_854390.1 | PREDICTED: similar to formin 2                                                                                                                                                                                                                                   |
| XP_854391.1 | PREDICTED: similar to Lon protease homolog, mitochondrial precursor (Lon protease-like protein) (LONP) (LONHs) isoform 1                                                                                                                                         |
| XP_854396.1 | PREDICTED: hypothetical protein XP_849303                                                                                                                                                                                                                        |
| XP_854398.1 | PREDICTED: similar to Alpha-mannosidase 2C1 (Alpha-D-mannoside mannohydrolase) (Mannosidase alpha class 2C member 1) (Alpha mannosidase 6A8B)                                                                                                                    |
| XP_854399.1 | PREDICTED: similar to RAB11B, member RAS oncogene family                                                                                                                                                                                                         |

|             |                                                                                                                                                       |
|-------------|-------------------------------------------------------------------------------------------------------------------------------------------------------|
| XP_854408.1 | PREDICTED: similar to LINE-1 reverse transcriptase homolog                                                                                            |
| XP_854411.1 | PREDICTED: similar to protein tyrosine phosphatase, non-receptor type 9                                                                               |
| XP_854419.1 | PREDICTED: similar to lung-inducible neuralized-related C3HC4 RING domain protein                                                                     |
| XP_854421.1 | PREDICTED: hypothetical protein XP_849328                                                                                                             |
| XP_854426.1 | PREDICTED: similar to Interleukin-9 receptor precursor (IL-9R) (CD129 antigen)                                                                        |
| XP_854427.1 | PREDICTED: similar to eukaryotic translation elongation factor 1 alpha 1                                                                              |
| XP_854430.1 | PREDICTED: similar to Neuromedin-B receptor (NMB-R) (Neuromedin-B-preferring bombesin receptor)                                                       |
| XP_854431.1 | PREDICTED: similar to E2F transcription factor 4                                                                                                      |
| XP_854432.1 | PREDICTED: similar to Proliferating-cell nucleolar antigen p120 (Proliferation-associated nucleolar protein p120)                                     |
| XP_854436.1 | PREDICTED: similar to cylindromatosis (turban tumor syndrome)                                                                                         |
| XP_854438.1 | PREDICTED: similar to Creatine kinase B-type (Creatine kinase, B chain) (B-CK)                                                                        |
| XP_854440.1 | PREDICTED: similar to zinc finger protein 398 isoform 1                                                                                               |
| XP_854443.1 | PREDICTED: similar to USP6 N-terminal like protein (Related to the N terminus of tre) (RN-tre)                                                        |
| XP_854446.1 | PREDICTED: similar to plasma membrane associated protein, S3-12 isoform 1                                                                             |
| XP_854450.1 | PREDICTED: similar to Breast carcinoma amplified sequence 1 (Novel amplified in breast cancer 1) (Amplified and overexpressed in breast cancer)       |
| XP_854459.1 | PREDICTED: similar to zinc finger protein 613 isoform 2                                                                                               |
| XP_854460.1 | PREDICTED: similar to zinc finger protein 514                                                                                                         |
| XP_854475.1 | PREDICTED: similar to Protein C14orf112 precursor                                                                                                     |
| XP_854488.1 | PREDICTED: similar to Ral guanine nucleotide dissociation stimulator (RalGEF) (RalGDS)                                                                |
| XP_854489.1 | PREDICTED: similar to transmembrane protein 16A                                                                                                       |
| XP_854492.1 | PREDICTED: hypothetical protein XP_849399                                                                                                             |
| XP_854493.1 | PREDICTED: similar to L-lactate dehydrogenase B chain (LDH-B) (LDH heart subunit) (LDH-H)                                                             |
| XP_854498.1 | PREDICTED: similar to microtubule-associated protein 7                                                                                                |
| XP_854504.1 | PREDICTED: similar to Aldehyde dehydrogenase, mitochondrial precursor (ALDH class 2) (ALDH1) (ALDH-E2)                                                |
| XP_854513.1 | PREDICTED: similar to ribosomal protein S6 kinase polypeptide 3                                                                                       |
| XP_854518.1 | PREDICTED: similar to Nucleoside diphosphate-linked moiety X motif 6 (Nudix motif 6) (Protein GFG) (GFG-1) (Antisense basic fibroblast growth factor) |
| XP_854519.1 | PREDICTED: similar to oral cancer overexpressed 1                                                                                                     |
| XP_854521.1 | PREDICTED: similar to Chorion-specific transcription factor GCMA (Glial cells missing homolog 1) (GCM motif protein 1) (hGCMA)                        |
| XP_854525.1 | PREDICTED: similar to TATA box binding protein isoform 1                                                                                              |
| XP_854528.1 | PREDICTED: similar to acyl-Coenzyme A oxidase-like                                                                                                    |
| XP_854529.1 | PREDICTED: similar to cGMP-inhibited 3,5-cyclic phosphodiesterase B (Cyclic GMP inhibited phosphodiesterase B) (CGI-PDE B) (CGIPDE1) (CGIP1)          |
| XP_854533.1 | PREDICTED: similar to cytochrome P450, family 2, subfamily R, polypeptide 1                                                                           |
| XP_854534.1 | PREDICTED: similar to Groudhog (hedgehog-like family) family member (grd-6)                                                                           |
| XP_854536.1 | PREDICTED: similar to lens intrinsic membrane protein 2, 19kDa                                                                                        |
| XP_854542.1 | PREDICTED: similar to programmed cell death 2 isoform 1 isoform 2                                                                                     |
| XP_854544.1 | PREDICTED: similar to syntaxin 11                                                                                                                     |



|             |                                                                                                                                                                         |
|-------------|-------------------------------------------------------------------------------------------------------------------------------------------------------------------------|
| XP_854557.1 | PREDICTED: similar to high-mobility group box 2                                                                                                                         |
| XP_854570.1 | PREDICTED: similar to Neurturin precursor                                                                                                                               |
| XP_854582.1 | PREDICTED: similar to F43E2.3                                                                                                                                           |
| XP_854589.1 | PREDICTED: similar to beta-casein-like protein                                                                                                                          |
| XP_854594.1 | PREDICTED: similar to Macrophage metalloelastase precursor (HME) (Matrix metalloproteinase-12) (MMP-12) (Macrophage elastase) (ME)                                      |
| XP_854595.1 | PREDICTED: similar to S-adenosylhomocysteine hydrolase-like 1                                                                                                           |
| XP_854600.1 | PREDICTED: similar to Macrophage colony stimulating factor-1 precursor (CSF-1) (MCSF) (M-CSF) (Lanimoestim)                                                             |
| XP_854602.1 | PREDICTED: similar to Heterogeneous nuclear ribonucleoprotein A1 (Helix-destabilizing protein) (Single-strand binding protein) (hnRNP core protein A1) (HDP)            |
| XP_854607.1 | PREDICTED: hypothetical protein XP_849514                                                                                                                               |
| XP_854614.1 | PREDICTED: similar to Guanine nucleotide-binding protein G(k), alpha subunit (G(i) alpha-3)                                                                             |
| XP_854621.1 | PREDICTED: hypothetical protein XP_849528                                                                                                                               |
| XP_854630.1 | PREDICTED: similar to Tetraspanin-9 (Tspan-9) (Tetraspan NET-5)                                                                                                         |
| XP_854637.1 | PREDICTED: similar to MARCKS-related protein (Macrophage myristoylated alanine-rich C kinase substrate) (Mac-MARCKS) (MacMARCKS)                                        |
| XP_854646.1 | PREDICTED: similar to calponin 2 isoform a isoform 1                                                                                                                    |
| XP_854651.1 | PREDICTED: similar to Hyaluronan mediated motility receptor (Intracellular hyaluronic acid binding protein) (Receptor for hyaluronan-mediated motility) (CD168 antigen) |
| XP_854652.1 | PREDICTED: similar to myosin binding protein H-like                                                                                                                     |
| XP_854655.1 | PREDICTED: similar to CG31156-PA, isoform A                                                                                                                             |
| XP_854657.1 | PREDICTED: similar to Stress-induced-phosphoprotein 1 (STI1) (Hsc70/Hsp90-organizing protein) (Hop) (Transformation-sensitive protein IEF SSP 3521)                     |
| XP_854673.1 | PREDICTED: hypothetical protein XP_849580                                                                                                                               |
| XP_854677.1 | PREDICTED: similar to sal-like 4                                                                                                                                        |
| XP_854690.1 | PREDICTED: similar to Jumonji/ARID domain-containing protein 1A (Retinoblastoma-binding protein 2) (RBBP-2)                                                             |
| XP_854691.1 | PREDICTED: hypothetical protein XP_849598                                                                                                                               |
| XP_854693.1 | PREDICTED: similar to PRP38 pre-mRNA processing factor 38 (yeast) domain containing B                                                                                   |
| XP_854697.1 | PREDICTED: similar to L-lactate dehydrogenase A chain (LDH-A) (LDH muscle subunit) (LDH-M) (Proliferation-inducing gene 19 protein)                                     |
| XP_854703.1 | PREDICTED: similar to Fanconi anemia, complementation group G                                                                                                           |
| XP_854713.1 | PREDICTED: similar to serine/threonine kinase 22 substrate 1                                                                                                            |
| XP_854716.1 | PREDICTED: similar to Potential phospholipid-transporting ATPase ID (ATPase class I type 8B member 2)                                                                   |
| XP_854738.1 | PREDICTED: similar to solute carrier family 25 member 24 isoform 2                                                                                                      |
| XP_854744.1 | PREDICTED: similar to ras inhibitor RIN1                                                                                                                                |
| XP_854748.1 | PREDICTED: similar to melanoma antigen family B, 4                                                                                                                      |
| XP_854754.1 | PREDICTED: hypothetical protein XP_849661                                                                                                                               |
| XP_854758.1 | PREDICTED: similar to F32D8.4                                                                                                                                           |
| XP_854762.1 | PREDICTED: similar to transposon-derived Buster3 transposase-like                                                                                                       |
| XP_854783.1 | PREDICTED: similar to olfactory receptor Olr834                                                                                                                         |
| XP_854785.1 | PREDICTED: similar to non-POU domain containing, octamer-binding                                                                                                        |
| XP_854794.1 | PREDICTED: similar to FYVE, RhoGEF and PH domain containing protein 6 (Zinc finger FYVE domain containing protein 24)                                                   |

|             |                                                                                                                                                                                                                                                   |
|-------------|---------------------------------------------------------------------------------------------------------------------------------------------------------------------------------------------------------------------------------------------------|
| XP_854796.1 | PREDICTED: similar to expressed in non-metastatic cells 1, protein (NM23A) (nucleoside diphosphate kinase)                                                                                                                                        |
| XP_854803.1 | PREDICTED: similar to Keratin, type I cytoskeletal 18 (Cytokeratin 18) (K18) (CK 18)                                                                                                                                                              |
| XP_854806.1 | PREDICTED: similar to Zinc finger protein 40 (Human immunodeficiency virus type I enhancer-binding protein 1) (HIV-EP1) (Major histocompatibility complex binding protein 1) (MBP-1) (Positive regulatory domain II binding factor 1) (PRDII-BF1) |
| XP_854808.1 | PREDICTED: similar to KARP-1 binding protein 1 isoform 2                                                                                                                                                                                          |
| XP_854809.1 | PREDICTED: similar to Glycogen [starch] synthase, muscle                                                                                                                                                                                          |
| XP_854813.1 | PREDICTED: hypothetical protein XP_849720                                                                                                                                                                                                         |
| XP_854815.1 | PREDICTED: similar to Megakaryocyte-associated tyrosine-protein kinase (Tyrosine-protein kinase CTK) (Protein kinase HYL) (Hematopoietic consensus tyrosine-lacking kinase)                                                                       |
| XP_854818.1 | PREDICTED: similar to ribosomal protein L18                                                                                                                                                                                                       |
| XP_854820.1 | PREDICTED: similar to microtubule associated monooxygenase, calponin and LIM domain containing 1                                                                                                                                                  |
| XP_854821.1 | PREDICTED: similar to myc target 1                                                                                                                                                                                                                |
| XP_854823.1 | PREDICTED: similar to Voltage-gated potassium channel beta-1 subunit (K(+)) channel beta-1 subunit (Kv-beta-1)                                                                                                                                    |
| XP_854825.1 | PREDICTED: similar to mitochondrial ribosomal protein L35 isoform a                                                                                                                                                                               |
| XP_854828.1 | PREDICTED: similar to DEP domain containing protein 5                                                                                                                                                                                             |
| XP_854829.1 | PREDICTED: similar to F-box only protein 28                                                                                                                                                                                                       |
| XP_854831.1 | PREDICTED: similar to UBIQUITIN-LIKE PROTEIN FUBI                                                                                                                                                                                                 |
| XP_854843.1 | PREDICTED: similar to Slit homolog 2 protein precursor (Slit-2)                                                                                                                                                                                   |
| XP_854845.1 | PREDICTED: hypothetical protein XP_849752                                                                                                                                                                                                         |
| XP_854848.1 | PREDICTED: hypothetical protein XP_849755                                                                                                                                                                                                         |
| XP_854850.1 | PREDICTED: similar to calpain 8                                                                                                                                                                                                                   |
| XP_854851.1 | PREDICTED: similar to eukaryotic translation initiation factor 4A, isoform 1                                                                                                                                                                      |
| XP_854852.1 | PREDICTED: similar to granulysin isoform NKG5                                                                                                                                                                                                     |
| XP_854861.1 | PREDICTED: hypothetical protein XP_849768                                                                                                                                                                                                         |
| XP_854869.1 | PREDICTED: similar to eukaryotic translation elongation factor 1 alpha 2                                                                                                                                                                          |
| XP_854883.1 | PREDICTED: similar to synaptogyrin 4                                                                                                                                                                                                              |
| XP_854889.1 | PREDICTED: similar to HMG-box transcription factor TCF-3                                                                                                                                                                                          |
| XP_854902.1 | PREDICTED: similar to Sphingosine 1-phosphate receptor Edg-6 (S1P receptor Edg-6) (Endothelial differentiation G-protein coupled receptor 6) (Sphingosine 1-phosphate receptor 4) (S1P4)                                                          |
| XP_854909.1 | PREDICTED: similar to KIAA1529                                                                                                                                                                                                                    |
| XP_854919.1 | PREDICTED: similar to Heat shock protein HSP 90-beta (HSP 84) (Tumor specific transplantation 84 kDa antigen) (TSTA)                                                                                                                              |
| XP_854920.1 | PREDICTED: similar to zinc finger protein 124                                                                                                                                                                                                     |
| XP_854921.1 | PREDICTED: similar to heat shock protein 1, beta                                                                                                                                                                                                  |
| XP_854922.1 | PREDICTED: similar to RAS guanyl releasing protein 2 isoform 1                                                                                                                                                                                    |
| XP_854923.1 | PREDICTED: similar to brevicin isoform 1                                                                                                                                                                                                          |
| XP_854930.1 | PREDICTED: similar to Sin3A associated protein p30-like                                                                                                                                                                                           |
| XP_854936.1 | PREDICTED: similar to NIMA (never in mitosis gene a)-related expressed kinase 6                                                                                                                                                                   |

|             |                                                                                                                                                                         |
|-------------|-------------------------------------------------------------------------------------------------------------------------------------------------------------------------|
| XP_854937.1 | PREDICTED: similar to glyceraldehyde-3-phosphate dehydrogenase                                                                                                          |
| XP_854938.1 | PREDICTED: similar to Glioma tumor suppressor candidate region gene 1 protein                                                                                           |
| XP_854939.1 | PREDICTED: similar to Potassium channel subfamily K member 4 (TWIK-related arachidonic acid-stimulated potassium channel protein) (TRAAK) (Two pore K(+) channel KT4.1) |
| XP_854940.1 | PREDICTED: hypothetical protein XP_849847                                                                                                                               |
| XP_854956.1 | PREDICTED: similar to kaptin                                                                                                                                            |
| XP_854960.1 | PREDICTED: similar to Stress-induced-phosphoprotein 1 (STI1) (Hsc70/Hsp90-organizing protein) (Hop) (Transformation-sensitive protein IEF SSP 3521)                     |
| XP_854962.1 | PREDICTED: similar to CG11699-PA                                                                                                                                        |
| XP_854970.1 | PREDICTED: similar to LYRIC/3D3                                                                                                                                         |
| XP_854977.1 | PREDICTED: similar to Ferritin light chain 1 (Ferritin L subunit 1)                                                                                                     |
| XP_854979.1 | PREDICTED: similar to Glyceraldehyde-3-phosphate dehydrogenase, liver (GAPDH)                                                                                           |
| XP_854981.1 | PREDICTED: similar to transmembrane protease, serine 9                                                                                                                  |
| XP_854982.1 | PREDICTED: similar to SPARC precursor (Secreted protein acidic and rich in cysteine) (Osteonectin) (ON) (Basement-membrane protein 40) (BM-40)                          |
| XP_854986.1 | PREDICTED: similar to transmembrane protease, serine 9                                                                                                                  |
| XP_855004.1 | PREDICTED: similar to Ig lambda chain V-I region BL2 precursor                                                                                                          |
| XP_855013.1 | PREDICTED: hypothetical protein XP_849920                                                                                                                               |
| XP_855016.1 | PREDICTED: similar to splicing factor 3a, subunit 2, 66kDa (predicted)                                                                                                  |
| XP_855022.1 | PREDICTED: similar to paraneoplastic antigen MA1                                                                                                                        |
| XP_855041.1 | PREDICTED: similar to MAP kinase-interacting serine/threonine kinase 2                                                                                                  |
| XP_855043.1 | PREDICTED: similar to neuro-oncological ventral antigen 2                                                                                                               |
| XP_855045.1 | PREDICTED: similar to KIAA1698 protein                                                                                                                                  |
| XP_855049.1 | PREDICTED: similar to low density lipoprotein receptor adaptor protein 1                                                                                                |
| XP_855053.1 | PREDICTED: similar to CG1814-PA, isoform A                                                                                                                              |
| XP_855056.1 | PREDICTED: similar to cytoplasmic beta-actin                                                                                                                            |
| XP_855059.1 | PREDICTED: similar to AHNAK nucleoprotein isoform 1                                                                                                                     |
| XP_855068.1 | PREDICTED: hypothetical protein XP_849975                                                                                                                               |
| XP_855076.1 | PREDICTED: similar to ATPase, Class I, type 8B, member 3                                                                                                                |
| XP_855080.1 | PREDICTED: similar to one cut domain, family member 3                                                                                                                   |
| XP_855089.1 | PREDICTED: similar to Homeobox protein CDX-1 (Caudal-type homeobox protein 1)                                                                                           |
| XP_855094.1 | PREDICTED: similar to Glyceraldehyde-3-phosphate dehydrogenase, liver (GAPDH)                                                                                           |
| XP_855099.1 | PREDICTED: similar to capping protein (actin filament) muscle Z-line, alpha 1                                                                                           |
| XP_855104.1 | PREDICTED: similar to RING finger and KH domain containing protein 1                                                                                                    |
| XP_855109.1 | PREDICTED: similar to sodium bicarbonate transporter 4 isoform c                                                                                                        |
| XP_855110.1 | PREDICTED: similar to interleukin 28 receptor, alpha isoform 1                                                                                                          |
| XP_855118.1 | PREDICTED: similar to CD3E antigen, epsilon polypeptide associated protein                                                                                              |
| XP_855128.1 | PREDICTED: similar to Ras-related protein Rab-13                                                                                                                        |

|             |                                                                                                                                                                                                     |
|-------------|-----------------------------------------------------------------------------------------------------------------------------------------------------------------------------------------------------|
| XP_855129.1 | PREDICTED: similar to glutamate-ammonia ligase                                                                                                                                                      |
| XP_855134.1 | PREDICTED: similar to ubiquitin specific protease 34                                                                                                                                                |
| XP_855142.1 | PREDICTED: similar to transducer of regulated cAMP response element-binding protein (CREB) 2                                                                                                        |
| XP_855148.1 | PREDICTED: similar to melanoma antigen family A, 10                                                                                                                                                 |
| XP_855167.1 | PREDICTED: similar to T-cell surface glycoprotein CD5 precursor (Lymphocyte glycoprotein T1/Leu-1) (Lymphocyte antigen CD5)                                                                         |
| XP_855170.1 | PREDICTED: similar to CG5237-PA                                                                                                                                                                     |
| XP_855175.1 | PREDICTED: similar to B-cell lymphoma 3-encoded protein (Bcl-3 protein)                                                                                                                             |
| XP_855179.1 | PREDICTED: similar to GBP protein isoform a                                                                                                                                                         |
| XP_855183.1 | PREDICTED: similar to minor histocompatibility antigen HA-1                                                                                                                                         |
| XP_855192.1 | PREDICTED: similar to TLH29 protein precursor                                                                                                                                                       |
| XP_855193.1 | PREDICTED: similar to AT-rich interactive domain-containing protein 3A (ARID domain-containing protein 3A) (B-cell regulator of IgH transcription) (Bright) (E2F binding protein 1)                 |
| XP_855205.1 | PREDICTED: similar to zinc finger protein 227                                                                                                                                                       |
| XP_855209.1 | PREDICTED: similar to Myotubularin                                                                                                                                                                  |
| XP_855212.1 | PREDICTED: similar to zinc finger protein 420                                                                                                                                                       |
| XP_855213.1 | PREDICTED: similar to Zinc finger protein 283                                                                                                                                                       |
| XP_855216.1 | PREDICTED: similar to Glyceraldehyde-3-phosphate dehydrogenase, liver (GAPDH)                                                                                                                       |
| XP_855221.1 | PREDICTED: similar to Collagen alpha 2(I) chain precursor                                                                                                                                           |
| XP_855231.1 | PREDICTED: hypothetical protein XP_850138                                                                                                                                                           |
| XP_855233.1 | PREDICTED: similar to hyperpolarization activated cyclic nucleotide-gated potassium channel 2                                                                                                       |
| XP_855237.1 | PREDICTED: similar to immunity-related GTPase family, Q1                                                                                                                                            |
| XP_855248.1 | PREDICTED: similar to MRG-binding protein                                                                                                                                                           |
| XP_855257.1 | PREDICTED: similar to Myristoylated alanine-rich C-kinase substrate (MARCKS) (Protein kinase C substrate 80 kDa protein)                                                                            |
| XP_855258.1 | PREDICTED: similar to mesoderm induction early response 1                                                                                                                                           |
| XP_855261.1 | PREDICTED: similar to norrin                                                                                                                                                                        |
| XP_855262.1 | PREDICTED: similar to transcription factor-like 5 protein                                                                                                                                           |
| XP_855277.1 | PREDICTED: similar to inhibitor of kappa light polypeptide gene enhancer in B-cells, kinase complex-associated protein                                                                              |
| XP_855282.1 | PREDICTED: similar to Glyceraldehyde-3-phosphate dehydrogenase, liver (GAPDH)                                                                                                                       |
| XP_855284.1 | PREDICTED: similar to glutamate receptor KA2 precursor                                                                                                                                              |
| XP_855286.1 | PREDICTED: similar to Na <sup>+</sup> /K <sup>+</sup> -ATPase alpha 3 subunit                                                                                                                       |
| XP_855287.1 | PREDICTED: similar to CG2698-PA                                                                                                                                                                     |
| XP_855292.1 | PREDICTED: similar to doublesex and mab-3 related transcription factor 7                                                                                                                            |
| XP_855298.1 | PREDICTED: similar to Cell division protein kinase 4 (Cyclin-dependent kinase 4) (PSK-J3)                                                                                                           |
| XP_855305.1 | PREDICTED: similar to Heterogeneous nuclear ribonucleoprotein A1 (Helix-destabilizing protein) (Single-strand binding protein) (hnRNP core protein A1) (HDP-1) (Topoisomerase-inhibitor suppressed) |
| XP_855308.1 | PREDICTED: similar to CG33108-PA                                                                                                                                                                    |

|             |                                                                                                                                                    |
|-------------|----------------------------------------------------------------------------------------------------------------------------------------------------|
| XP_855309.1 | PREDICTED: similar to dachsous 2 isoform 1                                                                                                         |
| XP_855310.1 | PREDICTED: similar to dapper 2                                                                                                                     |
| XP_855314.1 | PREDICTED: similar to numb homolog (Drosophila)-like                                                                                               |
| XP_855318.1 | PREDICTED: similar to 26S proteasome-associated UCH37 interacting protein 1 (X-linked protein STS1769)                                             |
| XP_855323.1 | PREDICTED: similar to Extracellular matrix protein 2 precursor (Matrix glycoprotein SC1/ECM2)                                                      |
| XP_855325.1 | PREDICTED: similar to SH3 domain GRB2-like protein B1 (Endophilin B1) (Bax-interacting factor 1) (Bif-1)                                           |
| XP_855330.1 | PREDICTED: similar to calcium activated chloride channel 2                                                                                         |
| XP_855335.1 | PREDICTED: similar to potassium voltage-gated channel KQT-like protein 2 isoform 2                                                                 |
| XP_855338.1 | PREDICTED: similar to Fc fragment of IgG binding protein                                                                                           |
| XP_855340.1 | PREDICTED: hypothetical protein XP_850247                                                                                                          |
| XP_855341.1 | PREDICTED: similar to ATP-binding cassette, sub-family D, member 1 (Adrenoleukodystrophy protein) (ALDP)                                           |
| XP_855343.1 | PREDICTED: similar to statin-like                                                                                                                  |
| XP_855344.1 | PREDICTED: similar to PTK6 protein tyrosine kinase 6                                                                                               |
| XP_855345.1 | PREDICTED: similar to CREBBP/EP300 inhibitor 2                                                                                                     |
| XP_855347.1 | PREDICTED: similar to Serine/threonine-protein kinase 23 (Muscle-specific serine kinase 1) (MSSK-1)                                                |
| XP_855349.1 | PREDICTED: similar to amino acid transport system N2                                                                                               |
| XP_855350.1 | PREDICTED: similar to WD repeat domain 27                                                                                                          |
| XP_855351.1 | PREDICTED: similar to Delta-like protein 3 precursor (Drosophila Delta homolog 3)                                                                  |
| XP_855355.1 | PREDICTED: similar to N-acylglucosamine 2-epimerase (GlcNAc 2-epimerase) (N-acetyl-D-glucosamine 2-epimerase) (AGE) (Renin-binding protein) (RnBP) |
| XP_855359.1 | PREDICTED: similar to ITBA1 protein (CXorf12 protein) (DXS9878E)                                                                                   |
| XP_855364.1 | PREDICTED: similar to ADP-ribosylation factor related protein 1                                                                                    |
| XP_855370.1 | PREDICTED: similar to Delta-aminolevulinic acid dehydratase (Porphobilinogen synthase) (ALADH)                                                     |
| XP_855379.1 | PREDICTED: similar to PDZ domain containing, X chromosome                                                                                          |
| XP_855386.1 | PREDICTED: similar to uridine-cytidine kinase 1-like 1                                                                                             |
| XP_855392.1 | PREDICTED: similar to chromosome 2 open reading frame 32                                                                                           |
| XP_855409.1 | PREDICTED: similar to signal-induced proliferation-associated 1 like 3                                                                             |
| XP_855411.1 | PREDICTED: similar to shroom                                                                                                                       |
| XP_855414.1 | PREDICTED: similar to CASK-interacting protein CIP98                                                                                               |
| XP_855416.1 | PREDICTED: similar to tubulin, alpha 1                                                                                                             |
| XP_855419.1 | PREDICTED: similar to nudix-type motif 11                                                                                                          |
| XP_855424.1 | PREDICTED: similar to Collagen alpha 1(III) chain precursor                                                                                        |
| XP_855427.1 | PREDICTED: similar to tumor endothelial marker 8 isoform 1 precursor                                                                               |
| XP_855442.1 | PREDICTED: similar to Atrial natriuretic peptide clearance receptor precursor (ANP-C) (ANPRC) (NPR-C) (Atrial natriuretic peptide C-type receptor) |
| XP_855443.1 | PREDICTED: similar to membrane-associated RING-CH protein I                                                                                        |
| XP_855450.1 | PREDICTED: similar to Fc fragment of IgG binding protein                                                                                           |
| XP_855457.1 | PREDICTED: similar to amnionless                                                                                                                   |

|             |                                                                                                                                                                           |
|-------------|---------------------------------------------------------------------------------------------------------------------------------------------------------------------------|
| XP_855464.1 | PREDICTED: similar to P8 MTCP-1 protein (Mature T-cell proliferation-1 type A) (MTCP-1 type A) (P8MTCP1)                                                                  |
| XP_855474.1 | PREDICTED: similar to suprabasin                                                                                                                                          |
| XP_855482.1 | PREDICTED: similar to CG5323-PA                                                                                                                                           |
| XP_855486.1 | PREDICTED: similar to Putative G-protein coupled receptor 40                                                                                                              |
| XP_855489.1 | PREDICTED: similar to Synaptobrevin-like protein 1                                                                                                                        |
| XP_855490.1 | PREDICTED: similar to Transforming growth factor alpha precursor (TGF-alpha) (EGF-like TGF) (ETGF) (TGF type 1)                                                           |
| XP_855503.1 | PREDICTED: similar to MutS protein homolog 4                                                                                                                              |
| XP_855505.1 | PREDICTED: similar to Ventral anterior homeobox 2                                                                                                                         |
| XP_855506.1 | PREDICTED: similar to Glucose-6-phosphate isomerase (GPI) (Phosphoglucose isomerase) (PGI) (Phosphohexose isomerase) (PHI) (Neuroleukin) (NLK) (Sperm antigen-36) (SA-36) |
| XP_855507.1 | PREDICTED: hypothetical protein XP_850414                                                                                                                                 |
| XP_855512.1 | PREDICTED: similar to adenylosuccinate synthase-like 1 isoform 2                                                                                                          |
| XP_855513.1 | PREDICTED: similar to CD27-binding (Siva) protein isoform 1                                                                                                               |
| XP_855517.1 | PREDICTED: similar to phospholipase D family, member 4                                                                                                                    |
| XP_855518.1 | PREDICTED: similar to regulator of G protein signaling 9-binding protein                                                                                                  |
| XP_855519.1 | PREDICTED: similar to AHNAK nucleoprotein isoform 1                                                                                                                       |
| XP_855532.1 | PREDICTED: similar to Complement C5 precursor                                                                                                                             |
| XP_855537.1 | PREDICTED: similar to I(3)mbt-like 3 isoform a                                                                                                                            |
| XP_855566.1 | PREDICTED: skeletal muscle chloride channel CIC-1                                                                                                                         |
| XP_855567.1 | PREDICTED: aquaporin 1                                                                                                                                                    |
| XP_855569.1 | PREDICTED: RAB8A, member RAS oncogene family                                                                                                                              |
| XP_855572.1 | PREDICTED: CE8 protein, variant 2                                                                                                                                         |
| XP_855577.1 | PREDICTED: guanylate cyclase E                                                                                                                                            |
| XP_855589.1 | PREDICTED: rab11 GTP-binding protein                                                                                                                                      |
| XP_855592.1 | PREDICTED: interleukin 6                                                                                                                                                  |
| XP_855602.1 | PREDICTED: pro-melanin-concentrating hormone                                                                                                                              |
| XP_855618.1 | PREDICTED: cOR4S3 olfactory receptor family 4 subfamily S-like                                                                                                            |
| XP_855624.1 | PREDICTED: MHC class Ib                                                                                                                                                   |
| XP_855650.1 | PREDICTED: similar to agrin isoform 2                                                                                                                                     |
| XP_855659.1 | PREDICTED: similar to tripartite motif-containing 39 isoform 2 isoform 2                                                                                                  |
| XP_855660.1 | PREDICTED: similar to myelin transcription factor 1-like isoform 4                                                                                                        |
| XP_855679.1 | PREDICTED: similar to Cytoplasmic antipeptidase 3 (CAP3) (CAP-3) (Protease inhibitor 9) (Serp1n B9) isoform 2                                                             |
| XP_855709.1 | PREDICTED: similar to NipSnap2 protein (Glioblastoma amplified sequence) isoform 3                                                                                        |
| XP_855731.1 | PREDICTED: similar to calcium channel, voltage-dependent, beta 2 subunit isoform 7 isoform 3                                                                              |
| XP_855740.1 | PREDICTED: similar to mitogen-activated protein kinase 8 isoform 4 isoform 6                                                                                              |
| XP_855757.1 | PREDICTED: similar to cDNA sequence BC027342 isoform 3                                                                                                                    |

|             |                                                                                                                                                                                                               |
|-------------|---------------------------------------------------------------------------------------------------------------------------------------------------------------------------------------------------------------|
| XP_855759.1 | PREDICTED: similar to eukaryotic translation elongation factor 1 alpha 2 isoform 2                                                                                                                            |
| XP_855762.1 | PREDICTED: hypothetical protein XP_850669                                                                                                                                                                     |
| XP_855765.1 | PREDICTED: similar to Enhancer of zeste homolog 2 (ENX-1) isoform 4                                                                                                                                           |
| XP_855814.1 | PREDICTED: similar to Ca <sup>2+</sup> -dependent secretion activator isoform 1 isoform 4                                                                                                                     |
| XP_855821.1 | PREDICTED: similar to Immunoglobulin lambda-like polypeptide 1 precursor (Immunoglobulin-related 14.1 protein) (Immunoglobulin omega polypeptide) (Lambda 5) (CD179b antigen) isoform 3                       |
| XP_855884.1 | PREDICTED: hypothetical protein XP_850791, partial                                                                                                                                                            |
| XP_855886.1 | PREDICTED: similar to carnitine palmitoyltransferase 1B isoform a isoform 4                                                                                                                                   |
| XP_855894.1 | PREDICTED: similar to NAD-dependent deacetylase sirtuin-3, mitochondrial precursor (SIR2-like protein 3) (hSIRT3) isoform 5                                                                                   |
| XP_855900.1 | PREDICTED: similar to regulator of chromosome condensation and BTB domain containing protein 2 isoform 2                                                                                                      |
| XP_855904.1 | PREDICTED: similar to Serine--pyruvate aminotransferase (SPT) (Alanine--glyoxylate aminotransferase) (AGT) isoform 3                                                                                          |
| XP_855950.1 | PREDICTED: similar to Immunoglobulin lambda-like polypeptide 1 precursor (Immunoglobulin-related 14.1 protein) (Immunoglobulin omega polypeptide) (Lambda 5) (CD179b antigen) isoform 6                       |
| XP_855961.1 | PREDICTED: similar to cofactor of BRCA1 isoform 4                                                                                                                                                             |
| XP_855996.1 | PREDICTED: similar to ATPase, H <sup>+</sup> transporting, lysosomal 70kD, V1 subunit A, isoform 1 isoform 2                                                                                                  |
| XP_855999.1 | PREDICTED: similar to neurofascin isoform 3                                                                                                                                                                   |
| XP_856027.1 | PREDICTED: similar to Heterogeneous nuclear ribonucleoprotein A1 (Helix-destabilizing protein) (Single-strand binding protein) (hnRNP core protein A1) (HDP-1) (Topoisomerase-inhibitor suppressed) isoform 3 |
| XP_856037.1 | PREDICTED: similar to Signal transducer and activator of transcription 1-alpha/beta (Transcription factor ISGF-3 components p91/p84) isoform 5                                                                |
| XP_856047.1 | PREDICTED: similar to Moesin (Membrane-organizing extension spike protein) isoform 5                                                                                                                          |
| XP_856065.1 | PREDICTED: similar to Heterogeneous nuclear ribonucleoprotein A1 (Helix-destabilizing protein) (Single-strand binding protein) (hnRNP core protein A1) (HDP-1) (Topoisomerase-inhibitor suppressed) isoform 4 |
| XP_856072.1 | PREDICTED: similar to semaphorin 5A isoform 3                                                                                                                                                                 |
| XP_856078.1 | PREDICTED: similar to sperm associated antigen 7 isoform 4                                                                                                                                                    |
| XP_856105.1 | PREDICTED: similar to Vigilin (High density lipoprotein-binding protein) (HDL-binding protein) isoform 6                                                                                                      |
| XP_856108.1 | PREDICTED: similar to zinc finger protein 665 isoform 3                                                                                                                                                       |
| XP_856110.1 | PREDICTED: similar to heterogeneous nuclear ribonucleoprotein A3 isoform 3                                                                                                                                    |
| XP_856111.1 | PREDICTED: similar to Elongation factor 1-gamma (EF-1-gamma) (eEF-1B gamma) isoform 13                                                                                                                        |
| XP_856120.1 | PREDICTED: similar to tyrosylprotein sulfotransferase 1 isoform 3                                                                                                                                             |
| XP_856126.1 | PREDICTED: hypothetical protein XP_851033                                                                                                                                                                     |
| XP_856145.1 | PREDICTED: similar to Zinc finger protein 239 (Zinc finger protein MOK-2) (HOK-2) isoform 4                                                                                                                   |
| XP_856166.1 | PREDICTED: similar to zinc finger, CCHC domain containing 6 isoform 8                                                                                                                                         |
| XP_856168.1 | PREDICTED: similar to bromodomain containing protein 1 isoform 7                                                                                                                                              |
| XP_856184.1 | PREDICTED: similar to zinc finger protein 312 isoform 4                                                                                                                                                       |
| XP_856200.1 | PREDICTED: similar to Myosin Ib (Myosin I alpha) (MMI-alpha) (MMIa) (MYH-1c) isoform 5                                                                                                                        |
| XP_856209.1 | PREDICTED: similar to tubulin, beta, 2 isoform 2                                                                                                                                                              |
| XP_856215.1 | PREDICTED: hypothetical protein XP_851122                                                                                                                                                                     |

|             |                                                                                                                                                                                |
|-------------|--------------------------------------------------------------------------------------------------------------------------------------------------------------------------------|
| XP_856232.1 | PREDICTED: similar to high density lipoprotein binding protein isoform 9                                                                                                       |
| XP_856235.1 | PREDICTED: similar to Zinc finger protein 239 (Zinc finger protein MOK-2) (HOK-2) isoform 6                                                                                    |
| XP_856237.1 | PREDICTED: similar to Elongation factor 1-gamma (EF-1-gamma) (eEF-1B gamma) isoform 15                                                                                         |
| XP_856238.1 | PREDICTED: similar to Protein C21orf63 precursor (SUE21) isoform 3                                                                                                             |
| XP_856239.1 | PREDICTED: similar to CG4552-PA isoform 5                                                                                                                                      |
| XP_856254.1 | PREDICTED: hypothetical protein XP_851161                                                                                                                                      |
| XP_856255.1 | PREDICTED: hypothetical protein XP_851162                                                                                                                                      |
| XP_856282.1 | PREDICTED: similar to actinin, alpha 2 isoform 7                                                                                                                               |
| XP_856287.1 | PREDICTED: similar to Ubiquitin carboxyl-terminal hydrolase 14 (Ubiquitin thiolesterase 14) (Ubiquitin-specific processing protease 14) (Deubiquitinating enzyme 14) isoform 7 |
| XP_856294.1 | PREDICTED: hypothetical protein XP_851201                                                                                                                                      |
| XP_856311.1 | PREDICTED: similar to Elongation factor 1-gamma (EF-1-gamma) (eEF-1B gamma) isoform 4                                                                                          |
| XP_856328.1 | PREDICTED: similar to Mitochondrial import inner membrane translocase subunit Tim17 A (Inner membrane preprotein translocase Tim17a) isoform 3                                 |
| XP_856345.1 | PREDICTED: similar to pericentriolar material 1 isoform 4                                                                                                                      |
| XP_856359.1 | PREDICTED: similar to Zinc finger protein 239 (Zinc finger protein MOK-2) (HOK-2) isoform 9                                                                                    |
| XP_856372.1 | PREDICTED: similar to CG30394-PB, isoform B isoform 4                                                                                                                          |
| XP_856428.1 | PREDICTED: similar to protein tyrosine phosphatase type IVA, member 3 isoform 1 isoform 3                                                                                      |
| XP_856429.1 | PREDICTED: similar to plexin A4 isoform 8                                                                                                                                      |
| XP_856452.1 | PREDICTED: similar to UDP-GalNAc:polypeptide N-acetylgalactosaminyltransferase-like 3 isoform 4                                                                                |
| XP_856501.1 | PREDICTED: similar to midline 1 isoform alpha isoform 10                                                                                                                       |
| XP_856520.1 | PREDICTED: similar to Glycogen phosphorylase, brain form isoform 2                                                                                                             |
| XP_856525.1 | PREDICTED: similar to Ig lambda chain C regions isoform 19                                                                                                                     |
| XP_856532.1 | PREDICTED: similar to serine/threonine-protein kinase PRP4K isoform 6                                                                                                          |
| XP_856538.1 | PREDICTED: similar to arachidonate 12-lipoxygenase isoform 2                                                                                                                   |
| XP_856557.1 | PREDICTED: similar to pericentriolar material 1 isoform 8                                                                                                                      |
| XP_856584.1 | PREDICTED: similar to midline 1 isoform alpha isoform 12                                                                                                                       |
| XP_856595.1 | PREDICTED: similar to Ornithine decarboxylase (ODC) isoform 6                                                                                                                  |
| XP_856608.1 | PREDICTED: similar to Trifunctional purine biosynthetic protein adenosine-3 isoform 2                                                                                          |
| XP_856615.1 | PREDICTED: similar to Bromodomain adjacent to zinc finger domain 2B (hWALp4) isoform 6                                                                                         |
| XP_856620.1 | PREDICTED: similar to fusion (involved in t(12;16) in malignant liposarcoma) isoform a isoform 2                                                                               |
| XP_856641.1 | PREDICTED: similar to solute carrier family 41, member 3 isoform 2 isoform 2                                                                                                   |
| XP_856647.1 | PREDICTED: similar to Homeobox protein Hox-C13 (Hox-3G) isoform 5                                                                                                              |
| XP_856650.1 | PREDICTED: similar to C01G5.8 isoform 2                                                                                                                                        |
| XP_856664.1 | PREDICTED: similar to fusion (involved in t(12;16) in malignant liposarcoma) isoform a isoform 3                                                                               |
| XP_856674.1 | PREDICTED: similar to heterogeneous nuclear ribonucleoprotein H1 isoform 10                                                                                                    |
| XP_856687.1 | PREDICTED: similar to Homeobox protein Hox-C13 (Hox-3G) isoform 6                                                                                                              |



|             |                                                                                                                                                                                                                                         |
|-------------|-----------------------------------------------------------------------------------------------------------------------------------------------------------------------------------------------------------------------------------------|
| XP_856691.1 | PREDICTED: similar to Glycogen synthase kinase-3 beta (GSK-3 beta) isoform 4                                                                                                                                                            |
| XP_856730.1 | PREDICTED: similar to PEST-containing nuclear protein (PCNP) isoform 5                                                                                                                                                                  |
| XP_856747.1 | PREDICTED: similar to synapse-associated protein 102 isoform 4                                                                                                                                                                          |
| XP_856749.1 | PREDICTED: similar to heterogeneous nuclear ribonucleoprotein K isoform 7                                                                                                                                                               |
| XP_856760.1 | PREDICTED: similar to FAT tumor suppressor homolog 4 isoform 2                                                                                                                                                                          |
| XP_856791.1 | PREDICTED: similar to heterogeneous nuclear ribonucleoprotein K isoform 8                                                                                                                                                               |
| XP_856815.1 | PREDICTED: similar to Succinate dehydrogenase [ubiquinone] flavoprotein subunit, mitochondrial precursor (Fp) (Flavoprotein subunit of complex II) isoform 3                                                                            |
| XP_856818.1 | PREDICTED: similar to Bromodomain adjacent to zinc finger domain 2B (hWALp4) isoform 10                                                                                                                                                 |
| XP_856838.1 | PREDICTED: similar to CG10011-PA isoform 2                                                                                                                                                                                              |
| XP_856847.1 | PREDICTED: similar to kinesin family member 13B isoform 2                                                                                                                                                                               |
| XP_856870.1 | PREDICTED: hypothetical protein XP_851777                                                                                                                                                                                               |
| XP_856885.1 | PREDICTED: similar to RuvB-like protein 1 isoform 3                                                                                                                                                                                     |
| XP_856901.1 | PREDICTED: similar to Succinate dehydrogenase [ubiquinone] flavoprotein subunit, mitochondrial precursor (Fp) (Flavoprotein subunit of complex II) isoform 5                                                                            |
| XP_856913.1 | PREDICTED: similar to heterogeneous nuclear ribonucleoprotein K isoform a isoform 11                                                                                                                                                    |
| XP_856944.1 | PREDICTED: similar to cell division cycle 2-like 1 (PITSLRE proteins) isoform 2 isoform 5                                                                                                                                               |
| XP_856949.1 | PREDICTED: similar to Histone deacetylase 5 (HD5) (Antigen NY-CO-9) isoform 7                                                                                                                                                           |
| XP_856955.1 | PREDICTED: similar to Heterogeneous nuclear ribonucleoprotein H (hnRNP H) isoform 17                                                                                                                                                    |
| XP_856967.1 | PREDICTED: similar to Filamin B (FLN-B) (Beta-filamin) (Actin-binding-like protein) (Thyroid autoantigen) (Truncated actin-binding protein) (Truncated ABP) (ABP-280 homolog) (ABP-278) (Filamin 3) (Filamin homolog 1) (Fh1) isoform 9 |
| XP_856985.1 | PREDICTED: similar to cell division cycle 2-like 1 (PITSLRE proteins) isoform 2 isoform 6                                                                                                                                               |
| XP_856986.1 | PREDICTED: similar to General transcription factor II-I repeat domain-containing protein 1 (GTF2I repeat domain containing protein 1) (Binding factor for early enhancer) isoform 5                                                     |
| XP_857009.1 | PREDICTED: similar to sarcolemma associated protein isoform 2                                                                                                                                                                           |
| XP_857026.1 | PREDICTED: similar to cell division cycle 2-like 1 (PITSLRE proteins) isoform 1 isoform 7                                                                                                                                               |
| XP_857028.1 | PREDICTED: similar to Probable histone acetyltransferase MYST1 (MYST protein 1) (MOZ, YBF2/SAS3, SAS2 and TIP60 protein 1) (hMOF) isoform 4                                                                                             |
| XP_857058.1 | PREDICTED: similar to chondroitin beta1,4 N-acetylgalactosaminyltransferase 2 isoform 3                                                                                                                                                 |
| XP_857067.1 | PREDICTED: similar to Acyl-CoA dehydrogenase, very-long-chain specific, mitochondrial precursor (VLCAD) isoform 3                                                                                                                       |
| XP_857069.1 | PREDICTED: similar to GTF2I repeat domain containing 1 isoform 2 isoform 7                                                                                                                                                              |
| XP_857076.1 | PREDICTED: hypothetical protein XP_851983                                                                                                                                                                                               |
| XP_857077.1 | PREDICTED: hypothetical protein XP_851984                                                                                                                                                                                               |
| XP_857080.1 | PREDICTED: similar to Heterogeneous nuclear ribonucleoprotein H (hnRNP H) isoform 18                                                                                                                                                    |
| XP_857093.1 | PREDICTED: similar to Heat shock protein HSP 90-alpha (HSP 86) isoform 2                                                                                                                                                                |
| XP_857102.1 | PREDICTED: similar to SON protein isoform 12                                                                                                                                                                                            |
| XP_857137.1 | PREDICTED: similar to Heat shock protein HSP 90-alpha (HSP 86) isoform 3                                                                                                                                                                |
| XP_857138.1 | PREDICTED: similar to DNA-directed RNA polymerase III 39 kDa polypeptide (RNA polymerase III C39 subunit) isoform 2                                                                                                                     |
| XP_857140.1 | PREDICTED: similar to chondroitin sulfate GalNAcT-2 isoform 5                                                                                                                                                                           |

|             |                                                                                                                                                                                                                                                                            |
|-------------|----------------------------------------------------------------------------------------------------------------------------------------------------------------------------------------------------------------------------------------------------------------------------|
| XP_857149.1 | PREDICTED: similar to splicing factor 3b, subunit 1 isoform 1 isoform 16                                                                                                                                                                                                   |
| XP_857163.1 | PREDICTED: similar to heterogeneous nuclear ribonucleoprotein K isoform a isoform 16                                                                                                                                                                                       |
| XP_857164.1 | PREDICTED: similar to ubiquitin specific protease 52 isoform 7                                                                                                                                                                                                             |
| XP_857172.1 | PREDICTED: similar to Pyruvate dehydrogenase protein X component, mitochondrial precursor (Dihydrolipoamide dehydrogenase-binding protein of pyruvate dehydrogenase complex) (Lipoyl-containing pyruvate dehydrogenase complex component X) (E3-binding protein) (E... iso |
| XP_857175.1 | PREDICTED: similar to amyloid beta precursor protein-binding, family B, member 3 isoform e isoform 5                                                                                                                                                                       |
| XP_857205.1 | PREDICTED: hypothetical protein XP_852112                                                                                                                                                                                                                                  |
| XP_857207.1 | PREDICTED: similar to heterogeneous nuclear ribonucleoprotein K isoform 17                                                                                                                                                                                                 |
| XP_857217.1 | PREDICTED: similar to WHSC1L1 protein isoform long isoform 5                                                                                                                                                                                                               |
| XP_857231.1 | PREDICTED: similar to threonyl-tRNA synthetase-like 2 isoform 4                                                                                                                                                                                                            |
| XP_857243.1 | PREDICTED: similar to Acyl-CoA dehydrogenase, very-long-chain specific, mitochondrial precursor (VLCAD) isoform 7                                                                                                                                                          |
| XP_857253.1 | PREDICTED: similar to plectin 1 isoform 1 isoform 6                                                                                                                                                                                                                        |
| XP_857263.1 | PREDICTED: similar to amyloid beta precursor protein-binding, family B, member 3 isoform f isoform 7                                                                                                                                                                       |
| XP_857271.1 | PREDICTED: similar to poly(rC) binding protein 2 isoform 2                                                                                                                                                                                                                 |
| XP_857275.1 | PREDICTED: similar to SON DNA-binding protein isoform G isoform 16                                                                                                                                                                                                         |
| XP_857290.1 | PREDICTED: hypothetical protein XP_852197                                                                                                                                                                                                                                  |
| XP_857300.1 | PREDICTED: similar to Activin receptor type II precursor (ACTR-II) isoform 4                                                                                                                                                                                               |
| XP_857302.1 | PREDICTED: similar to sarcolemma associated protein isoform 8                                                                                                                                                                                                              |
| XP_857307.1 | PREDICTED: similar to ATPase, H <sup>+</sup> transporting, lysosomal V0 subunit a isoform 2 isoform 3                                                                                                                                                                      |
| XP_857346.1 | PREDICTED: similar to ATPase, H <sup>+</sup> transporting, lysosomal V0 subunit a isoform 2 isoform 4                                                                                                                                                                      |
| XP_857348.1 | PREDICTED: similar to Poly(rC)-binding protein 2 (Alpha-CP2) (Putative heterogeneous nuclear ribonucleoprotein X) (hnRNP X) (CTBP) (CBP) isoform 4                                                                                                                         |
| XP_857349.1 | PREDICTED: similar to Ribosome biogenesis protein BMS1 homolog isoform 5                                                                                                                                                                                                   |
| XP_857356.1 | PREDICTED: similar to Actin, alpha skeletal muscle (Alpha-actin 1) isoform 3                                                                                                                                                                                               |
| XP_857392.1 | PREDICTED: similar to Poly(rC)-binding protein 2 (Alpha-CP2) (Putative heterogeneous nuclear ribonucleoprotein X) (hnRNP X) (CTBP) (CBP) isoform 5                                                                                                                         |
| XP_857412.1 | PREDICTED: similar to heterogeneous nuclear ribonucleoprotein K isoform 22                                                                                                                                                                                                 |
| XP_857426.1 | PREDICTED: similar to L-lactate dehydrogenase B chain (LDH-B) (LDH heart subunit) (LDH-H) isoform 3                                                                                                                                                                        |
| XP_857428.1 | PREDICTED: similar to Filensin (Beaded filament structural protein 1) (Lens fiber cell beaded-filament structural protein CP 115) (CP115) (Lens intermediate filament like-heavy) (LIFL-H) isoform 4                                                                       |
| XP_857432.1 | PREDICTED: similar to Poly(rC)-binding protein 2 (Alpha-CP2) (Putative heterogeneous nuclear ribonucleoprotein X) (hnRNP X) (CTBP) (CBP) isoform 6                                                                                                                         |
| XP_857454.1 | PREDICTED: similar to transcription factor 20 isoform 2 isoform 2                                                                                                                                                                                                          |
| XP_857474.1 | PREDICTED: similar to Poly(rC)-binding protein 2 (Alpha-CP2) (Putative heterogeneous nuclear ribonucleoprotein X) (hnRNP X) (CTBP) (CBP) isoform 7                                                                                                                         |
| XP_857491.1 | PREDICTED: hypothetical protein XP_852398                                                                                                                                                                                                                                  |
| XP_857503.1 | PREDICTED: similar to retinol dehydrogenase 14 (all-trans and 9-cis) isoform 3                                                                                                                                                                                             |
| XP_857511.1 | PREDICTED: similar to CLIP-associating protein 2 isoform 8                                                                                                                                                                                                                 |
| XP_857515.1 | PREDICTED: similar to immunoglobulin iota chain preproprotein isoform 4                                                                                                                                                                                                    |
| XP_857530.1 | PREDICTED: similar to G-protein signalling modulator 1 (AGS3-like, C. elegans) isoform 5                                                                                                                                                                                   |

|             |                                                                                                                                                                                                                                |
|-------------|--------------------------------------------------------------------------------------------------------------------------------------------------------------------------------------------------------------------------------|
| XP_857532.1 | PREDICTED: hypothetical protein XP_852439 isoform 4                                                                                                                                                                            |
| XP_857557.1 | PREDICTED: similar to Poly(rC)-binding protein 2 (Alpha-CP2) (Putative heterogeneous nuclear ribonucleoprotein X) (hnRNP X) (CTBP) (CBP) isoform 9                                                                             |
| XP_857571.1 | PREDICTED: similar to G-protein signalling modulator 1 (AGS3-like, <i>C. elegans</i> ) isoform 6                                                                                                                               |
| XP_857578.1 | PREDICTED: similar to cytochrome c-1 isoform 3                                                                                                                                                                                 |
| XP_857593.1 | PREDICTED: similar to U2 small nuclear ribonucleoprotein B isoform 4                                                                                                                                                           |
| XP_857596.1 | PREDICTED: similar to immunoglobulin iota chain preproprotein isoform 6                                                                                                                                                        |
| XP_857606.1 | PREDICTED: similar to CG18549-PA isoform 3                                                                                                                                                                                     |
| XP_857633.1 | PREDICTED: similar to immunoglobulin iota chain preproprotein isoform 7                                                                                                                                                        |
| XP_857635.1 | PREDICTED: similar to eukaryotic translation elongation factor 1 alpha 2 isoform 2                                                                                                                                             |
| XP_857639.1 | PREDICTED: similar to Heterogeneous nuclear ribonucleoprotein D0 (hnRNP D0) (AU-rich element RNA-binding protein 1) isoform 4                                                                                                  |
| XP_857671.1 | PREDICTED: similar to immunoglobulin iota chain preproprotein isoform 8                                                                                                                                                        |
| XP_857698.1 | PREDICTED: similar to zinc finger protein 503 isoform 4                                                                                                                                                                        |
| XP_857702.1 | PREDICTED: similar to Kinesin heavy chain isoform 5C (Kinesin heavy chain neuron-specific 2) isoform 3                                                                                                                         |
| XP_857766.1 | PREDICTED: similar to male germ cell-associated kinase isoform 4                                                                                                                                                               |
| XP_857775.1 | PREDICTED: hypothetical protein XP_852682                                                                                                                                                                                      |
| XP_857783.1 | PREDICTED: similar to odd Oz/ten-m homolog 3 isoform 2                                                                                                                                                                         |
| XP_857817.1 | PREDICTED: similar to sterol regulatory element-binding transcription factor 2 isoform 2                                                                                                                                       |
| XP_857826.1 | PREDICTED: similar to abl-interactor 1 isoform d isoform 11                                                                                                                                                                    |
| XP_857831.1 | PREDICTED: similar to immunoglobulin iota chain preproprotein isoform 12                                                                                                                                                       |
| XP_857841.1 | PREDICTED: similar to Sodium channel protein type III alpha subunit (Voltage-gated sodium channel alpha subunit Nav1.3) (Sodium channel protein, brain III alpha subunit) (Voltage-gated sodium channel subtype III) isoform 4 |
| XP_857842.1 | PREDICTED: similar to complement component factor h isoform 11                                                                                                                                                                 |
| XP_857861.1 | PREDICTED: similar to neuregulin 1 isoform HRG-beta1 isoform 3                                                                                                                                                                 |
| XP_857870.1 | PREDICTED: similar to immunoglobulin iota chain preproprotein isoform 13                                                                                                                                                       |
| XP_857871.1 | PREDICTED: similar to Poly(rC)-binding protein 2 (Alpha-CP2) (Putative heterogeneous nuclear ribonucleoprotein X) (hnRNP X) (CTBP) (CBP) isoform 17                                                                            |
| XP_857876.1 | PREDICTED: similar to myosin light chain kinase isoform 1 isoform 7                                                                                                                                                            |
| XP_857889.1 | PREDICTED: similar to One cut domain family member 2 (ONECUT-2 transcription factor) (OC-2) isoform 2                                                                                                                          |
| XP_857899.1 | PREDICTED: similar to cAMP-dependent protein kinase type II-beta regulatory subunit isoform 7                                                                                                                                  |
| XP_857913.1 | PREDICTED: similar to ATP synthase O subunit, mitochondrial precursor (Oligomycin sensitivity conferral protein) (OSCP) isoform 2                                                                                              |
| XP_857917.1 | PREDICTED: similar to Sodium channel protein type III alpha subunit (Voltage-gated sodium channel alpha subunit Nav1.3) (Sodium channel protein, brain III alpha subunit) (Voltage-gated sodium channel subtype III) isoform 6 |
| XP_857919.1 | PREDICTED: similar to ankyrin 3 isoform 1 isoform 4                                                                                                                                                                            |
| XP_857930.1 | PREDICTED: hypothetical protein XP_852837                                                                                                                                                                                      |
| XP_857932.1 | PREDICTED: similar to ATP synthase beta chain, mitochondrial precursor isoform 4                                                                                                                                               |
| XP_857938.1 | PREDICTED: similar to pumilio homolog 2 isoform 3                                                                                                                                                                              |
| XP_857939.1 | PREDICTED: similar to cAMP-dependent protein kinase type II-beta regulatory subunit isoform 8                                                                                                                                  |

|             |                                                                                                                                                                                                                                                                          |
|-------------|--------------------------------------------------------------------------------------------------------------------------------------------------------------------------------------------------------------------------------------------------------------------------|
| XP_857973.1 | PREDICTED: similar to One cut domain family member 2 (ONECUT-2 transcription factor) (OC-2) isoform 4                                                                                                                                                                    |
| XP_857979.1 | PREDICTED: similar to trypsinogen 7 isoform 5                                                                                                                                                                                                                            |
| XP_857982.1 | PREDICTED: similar to cAMP-dependent protein kinase type II-beta regulatory subunit isoform 9                                                                                                                                                                            |
| XP_858022.1 | PREDICTED: similar to glycoprotein M6A isoform 1 isoform 2                                                                                                                                                                                                               |
| XP_858028.1 | PREDICTED: similar to wingless-type MMTV integration site family, member 7A precursor isoform 2                                                                                                                                                                          |
| XP_858035.1 | PREDICTED: similar to immunoglobulin iota chain preproprotein isoform 17                                                                                                                                                                                                 |
| XP_858054.1 | PREDICTED: similar to bromodomain containing 3 isoform 4                                                                                                                                                                                                                 |
| XP_858082.1 | PREDICTED: similar to myocyte enhancer factor 2A isoform 1 isoform 9                                                                                                                                                                                                     |
| XP_858086.1 | PREDICTED: similar to Zinc finger protein 148 (Zinc finger DNA binding protein 89) (Transcription factor ZBP-89) isoform 4                                                                                                                                               |
| XP_858103.1 | PREDICTED: similar to aconitase 2, mitochondrial isoform 4                                                                                                                                                                                                               |
| XP_858110.1 | PREDICTED: similar to Formin-binding protein 3 (Huntingtin yeast partner A) (Huntingtin-interacting protein HYPA/FBP11) (Fas-ligand associated factor 1) (NY-REN-6 antigen) isoform 7                                                                                    |
| XP_858140.1 | PREDICTED: similar to non-POU domain containing, octamer-binding isoform 7                                                                                                                                                                                               |
| XP_858147.1 | PREDICTED: similar to neuregulin 1 isoform ndf43 isoform 8                                                                                                                                                                                                               |
| XP_858149.1 | PREDICTED: similar to ATPase family, AAA domain containing 2 isoform 1 isoform 3                                                                                                                                                                                         |
| XP_858150.1 | PREDICTED: similar to eukaryotic translation elongation factor 1 alpha 2 isoform 3                                                                                                                                                                                       |
| XP_858154.1 | PREDICTED: similar to wingless-type MMTV integration site family, member 7A precursor isoform 5                                                                                                                                                                          |
| XP_858164.1 | PREDICTED: similar to yeast INO80-like protein isoform 4                                                                                                                                                                                                                 |
| XP_858174.1 | PREDICTED: similar to potassium voltage-gated channel, shaker-related subfamily, beta member 2 isoform 2 isoform 4                                                                                                                                                       |
| XP_858217.1 | PREDICTED: hypothetical protein XP_853124                                                                                                                                                                                                                                |
| XP_858240.1 | PREDICTED: similar to Serine/threonine protein phosphatase 2A, 55 kDa regulatory subunit B, alpha isoform (PP2A, subunit B, B-alpha isoform) (PP2A, subunit B, B55-alpha isoform) (PP2A, subunit B, PR55-alpha isoform) (PP2A, subunit B, R2-alpha isoform)... isoform 4 |
| XP_858260.1 | PREDICTED: similar to bromodomain containing 3 isoform 8                                                                                                                                                                                                                 |
| XP_858263.1 | PREDICTED: hypothetical protein XP_853170                                                                                                                                                                                                                                |
| XP_858278.1 | PREDICTED: similar to alpha isoform of regulatory subunit B55, protein phosphatase 2 isoform 5                                                                                                                                                                           |
| XP_858279.1 | PREDICTED: similar to sno, strawberry notch homolog 1 isoform 6                                                                                                                                                                                                          |
| XP_858281.1 | PREDICTED: similar to Retinoic acid receptor gamma-B (RAR-gamma-B) isoform 4                                                                                                                                                                                             |
| XP_858301.1 | PREDICTED: similar to ubiquilin 1 isoform 1 isoform 8                                                                                                                                                                                                                    |
| XP_858303.1 | PREDICTED: similar to aconitase 2, mitochondrial isoform 8                                                                                                                                                                                                               |
| XP_858314.1 | PREDICTED: similar to transmembrane protein 43 isoform 2                                                                                                                                                                                                                 |
| XP_858337.1 | PREDICTED: similar to Band 4.1-like protein 3 (4.1B) (Differentially expressed in adenocarcinoma of the lung protein 1) (DAL-1) (DAL1P) (mDAL-1) isoform 6                                                                                                               |
| XP_858342.1 | PREDICTED: hypothetical protein XP_853249                                                                                                                                                                                                                                |
| XP_858365.1 | PREDICTED: similar to calcipressin 1 isoform c isoform 8                                                                                                                                                                                                                 |
| XP_858373.1 | PREDICTED: similar to DNA-directed RNA polymerase II largest subunit (RPB1) isoform 15                                                                                                                                                                                   |
| XP_858379.1 | PREDICTED: similar to Alpha enolase (2-phospho-D-glycerate hydro-lyase) (Non-neural enolase) (NNE) (Enolase 1) (Phosphopyruvate hydratase) (C-myc promoter-binding protein) (MBP-1) (MPB-1) (Plasminogen-binding protein) isoform 3                                      |
| XP_858386.1 | PREDICTED: similar to Heterogeneous nuclear ribonucleoprotein A1 (Helix-destabilizing protein) (Single-strand binding protein) (hnRNP core protein A1) (HDP-1)                                                                                                           |

(Topoisomerase-inhibitor suppressed) isoform 3

|             |                                                                                                                                                                                                          |
|-------------|----------------------------------------------------------------------------------------------------------------------------------------------------------------------------------------------------------|
| XP_858387.1 | PREDICTED: similar to phosphodiesterase 4D interacting protein isoform 1 isoform 5                                                                                                                       |
| XP_858389.1 | PREDICTED: similar to Tyrosine-protein phosphatase, non-receptor type 4 (Protein-tyrosine phosphatase MEG1) (PTPase-MEG1) (MEG) isoform 2                                                                |
| XP_858393.1 | PREDICTED: similar to L-type calcium channel pore subunit isoform 1.3a isoform 3                                                                                                                         |
| XP_858413.1 | PREDICTED: similar to procollagen-lysine, 2-oxoglutarate 5-dioxygenase 3 precursor isoform 2                                                                                                             |
| XP_858415.1 | PREDICTED: similar to Band 4.1-like protein 3 (4.1B) (Differentially expressed in adenocarcinoma of the lung protein 1) (DAL-1) (DAL1P) (mDAL-1) isoform 8                                               |
| XP_858434.1 | PREDICTED: similar to Voltage-dependent L-type calcium channel alpha-1D subunit (Voltage-gated calcium channel alpha subunit Cav1.3) (Calcium channel, L type, alpha-1 polypeptide, isoform 2) isoform 4 |
| XP_858457.1 | PREDICTED: hypothetical protein XP_853364                                                                                                                                                                |
| XP_858473.1 | PREDICTED: similar to insulin-like growth factor binding protein 6 isoform 3                                                                                                                             |
| XP_858479.1 | PREDICTED: similar to adaptor-related protein complex 2, mu 1 subunit isoform b isoform 18                                                                                                               |
| XP_858484.1 | PREDICTED: similar to polymerase (RNA) II (DNA directed) polypeptide A isoform 18                                                                                                                        |
| XP_858487.1 | PREDICTED: similar to Band 4.1-like protein 3 (4.1B) (Differentially expressed in adenocarcinoma of the lung protein 1) (DAL-1) (DAL1P) (mDAL-1) isoform 10                                              |
| XP_858495.1 | PREDICTED: similar to feminization 1 homolog a isoform 2                                                                                                                                                 |
| XP_858504.1 | PREDICTED: similar to programmed cell death 6 interacting protein isoform 4                                                                                                                              |
| XP_858522.1 | PREDICTED: similar to Band 4.1-like protein 3 (4.1B) (Differentially expressed in adenocarcinoma of the lung protein 1) (DAL-1) (DAL1P) (mDAL-1) isoform 11                                              |
| XP_858540.1 | PREDICTED: similar to Jagged-1 precursor (Jagged1) (hJ1) isoform 3                                                                                                                                       |
| XP_858549.1 | PREDICTED: similar to Activated CDC42 kinase 1 (ACK-1) (Non-receptor protein tyrosine kinase Ack) (Tyrosine kinase non-receptor protein 2) isoform 2                                                     |
| XP_858557.1 | PREDICTED: similar to Band 4.1-like protein 3 (4.1B) (Differentially expressed in adenocarcinoma of the lung protein 1) (DAL-1) (DAL1P) (mDAL-1) isoform 12                                              |
| XP_858594.1 | PREDICTED: similar to Sodium channel protein type II alpha subunit (Voltage-gated sodium channel alpha subunit Nav1.2) (Sodium channel protein, brain II alpha subunit) (HBSC II) isoform 16             |
| XP_858596.1 | PREDICTED: similar to transforming growth factor, beta 2 isoform 2                                                                                                                                       |
| XP_858670.1 | PREDICTED: similar to eukaryotic translation initiation factor 4B isoform 7                                                                                                                              |
| XP_858676.1 | PREDICTED: similar to adaptor-related protein complex 2, mu 1 subunit isoform 23                                                                                                                         |
| XP_858705.1 | PREDICTED: similar to calcium channel, voltage-dependent, L type, alpha 1D subunit isoform 11                                                                                                            |
| XP_858708.1 | PREDICTED: similar to Jagged-1 precursor (Jagged1) (hJ1) isoform 7                                                                                                                                       |
| XP_858737.1 | PREDICTED: similar to glucosamine-6-phosphate deaminase 2 isoform 2                                                                                                                                      |
| XP_858750.1 | PREDICTED: similar to immunoglobulin iota chain preproprotein isoform 34                                                                                                                                 |
| XP_858752.1 | PREDICTED: similar to Myoferlin (Fer-1 like protein 3) isoform 3                                                                                                                                         |
| XP_858754.1 | PREDICTED: similar to Calpain-3 (Calpain L3) (Calpain p94) (Calcium-activated neutral proteinase 3) (CANP 3) (Muscle-specific calcium-activated neutral protease 3) isoform 3                            |
| XP_858765.1 | PREDICTED: similar to H3 histone, family 3B isoform 3                                                                                                                                                    |
| XP_858791.1 | PREDICTED: similar to Myoferlin (Fer-1 like protein 3) isoform 4                                                                                                                                         |
| XP_858809.1 | PREDICTED: hypothetical protein XP_853716                                                                                                                                                                |
| XP_858829.1 | PREDICTED: similar to runt-related transcription factor 1 isoform b isoform 11                                                                                                                           |
| XP_858836.1 | PREDICTED: similar to neuroligin 2 isoform 5                                                                                                                                                             |
| XP_858861.1 | PREDICTED: similar to Calpain-3 (Calpain L3) (Calpain p94) (Calcium-activated neutral proteinase 3) (CANP 3) (Muscle-specific calcium-activated neutral protease 3) isoform 6                            |

|             |                                                                                                                                                                                                                                                                            |
|-------------|----------------------------------------------------------------------------------------------------------------------------------------------------------------------------------------------------------------------------------------------------------------------------|
| XP_858869.1 | PREDICTED: similar to cytosolic sialic acid 9-O-acetyltransferase homolog isoform 2                                                                                                                                                                                        |
| XP_858882.1 | PREDICTED: hypothetical protein XP_853789                                                                                                                                                                                                                                  |
| XP_858903.1 | PREDICTED: similar to CG6340-PB, isoform B isoform 7                                                                                                                                                                                                                       |
| XP_858918.1 | PREDICTED: similar to O-linked GlcNAc transferase isoform 1 isoform 11                                                                                                                                                                                                     |
| XP_858920.1 | PREDICTED: similar to heat shock 70kD protein binding protein isoform 4                                                                                                                                                                                                    |
| XP_858939.1 | PREDICTED: similar to eukaryotic translation initiation factor 4B isoform 13                                                                                                                                                                                               |
| XP_858945.1 | PREDICTED: similar to ATP-binding cassette, sub-family F (GCN20), member 3 isoform 5                                                                                                                                                                                       |
| XP_858946.1 | PREDICTED: similar to glycosylphosphatidylinositol specific phospholipase D1 isoform 1 precursor isoform 4                                                                                                                                                                 |
| XP_859000.1 | PREDICTED: similar to ATPase, H+ transporting, lysosomal V0 subunit a isoform 1 isoform 8                                                                                                                                                                                  |
| XP_859035.1 | PREDICTED: similar to ATPase, H+ transporting, lysosomal V0 subunit a isoform 1 isoform 9                                                                                                                                                                                  |
| XP_859040.1 | PREDICTED: similar to regulating synaptic membrane exocytosis 2 isoform 1 isoform 3                                                                                                                                                                                        |
| XP_859064.1 | PREDICTED: similar to Coronin-1A (Coronin-like protein p57) (Coronin-like protein A) (CLIPINA) (Tryptophan aspartate-containing coat protein) (TACO) isoform 2                                                                                                             |
| XP_859081.1 | PREDICTED: similar to polybromo 1 isoform 4 isoform 5                                                                                                                                                                                                                      |
| XP_859096.1 | PREDICTED: similar to guanine nucleotide-binding protein, beta 2 isoform 3                                                                                                                                                                                                 |
| XP_859100.1 | PREDICTED: similar to ATPase, H+ transporting, lysosomal V0 subunit a isoform 1 isoform 11                                                                                                                                                                                 |
| XP_859109.1 | PREDICTED: similar to eukaryotic translation elongation factor 1 alpha 1 isoform 2                                                                                                                                                                                         |
| XP_859132.1 | PREDICTED: similar to guanine nucleotide-binding protein, beta 2 isoform 4                                                                                                                                                                                                 |
| XP_859140.1 | PREDICTED: hypothetical protein XP_854047                                                                                                                                                                                                                                  |
| XP_859142.1 | PREDICTED: hypothetical protein XP_854049                                                                                                                                                                                                                                  |
| XP_859152.1 | PREDICTED: similar to ATPase, H+ transporting, lysosomal V0 subunit a isoform 4 isoform 7                                                                                                                                                                                  |
| XP_859156.1 | PREDICTED: similar to gamma-aminobutyric acid (GABA-B) receptor binding protein isoform 3                                                                                                                                                                                  |
| XP_859164.1 | PREDICTED: similar to Keratin, type I cytoskeletal 18 (Cytokeratin 18) (K18) (CK 18) isoform 3                                                                                                                                                                             |
| XP_859169.1 | PREDICTED: similar to Kelch repeat and BTB domain containing protein 10 (Kelch-related protein 1) (Kel-like protein 23) (Sarcosin) isoform 3                                                                                                                               |
| XP_859178.1 | PREDICTED: similar to Phosphate regulating neutral endopeptidase (Metalloendopeptidase homolog PEX) (X-linked hypophosphatemia protein) (HYP) (Vitamin D-resistant hypophosphatemic rickets protein) isoform 2                                                             |
| XP_859185.1 | PREDICTED: similar to Dmx-like 1 isoform 4                                                                                                                                                                                                                                 |
| XP_859196.1 | PREDICTED: similar to nischarin isoform 3                                                                                                                                                                                                                                  |
| XP_859221.1 | PREDICTED: hypothetical protein XP_854128                                                                                                                                                                                                                                  |
| XP_859249.1 | PREDICTED: similar to Kelch repeat and BTB domain containing protein 10 (Kelch-related protein 1) (Kel-like protein 23) (Sarcosin) isoform 4                                                                                                                               |
| XP_859251.1 | PREDICTED: hypothetical protein XP_854158 isoform 3                                                                                                                                                                                                                        |
| XP_859253.1 | PREDICTED: similar to tubulin, alpha 1 isoform 2                                                                                                                                                                                                                           |
| XP_859256.1 | PREDICTED: similar to guanine nucleotide-binding protein, beta 2 isoform 7                                                                                                                                                                                                 |
| XP_859296.1 | PREDICTED: similar to ATP-dependent RNA helicase A (Nuclear DNA helicase II) (NDH II) (DEAH-box protein 9) isoform 7                                                                                                                                                       |
| XP_859300.1 | PREDICTED: similar to Vacuolar proton translocating ATPase 116 kDa subunit a isoform 1 (V-ATPase 116-kDa isoform a1) (Clathrin-coated vesicle/synaptic vesicle proton pump 116 kDa subunit) (Vacuolar proton pump subunit 1) (Vacuolar adenosine triphosphatase sub... iso |
| XP_859303.1 | PREDICTED: hypothetical protein XP_854210                                                                                                                                                                                                                                  |

|             |                                                                                                                                                                                                                                     |
|-------------|-------------------------------------------------------------------------------------------------------------------------------------------------------------------------------------------------------------------------------------|
| XP_859306.1 | PREDICTED: similar to Peroxisomal multifunctional enzyme type 2 (MFE-2) (D-bifunctional protein) (DBP) (17-beta-hydroxysteroid dehydrogenase 4) (17-beta-HSD 4) isoform 4                                                           |
| XP_859313.1 | PREDICTED: similar to RAF proto-oncogene serine/threonine-protein kinase (Raf-1) (C-RAF) (cRaf) isoform 5                                                                                                                           |
| XP_859346.1 | PREDICTED: similar to RAF proto-oncogene serine/threonine-protein kinase (Raf-1) (C-RAF) (cRaf) isoform 6                                                                                                                           |
| XP_859361.1 | PREDICTED: similar to catenin, alpha 3 isoform 4                                                                                                                                                                                    |
| XP_859371.1 | PREDICTED: similar to peroxiredoxin 4 isoform 3                                                                                                                                                                                     |
| XP_859373.1 | PREDICTED: similar to ribosomal protein S12 isoform 4                                                                                                                                                                               |
| XP_859388.1 | PREDICTED: similar to restin isoform 5                                                                                                                                                                                              |
| XP_859414.1 | PREDICTED: similar to regulating synaptic membrane exocytosis 2 isoform 1 isoform 11                                                                                                                                                |
| XP_859415.1 | PREDICTED: similar to cyclin D binding myb-like transcription factor 1 isoform 5                                                                                                                                                    |
| XP_859439.1 | PREDICTED: similar to Alpha enolase (2-phospho-D-glycerate hydro-lyase) (Non-neural enolase) (NNE) (Enolase 1) (Phosphopyruvate hydratase) (C-myc promoter-binding protein) (MBP-1) (MPB-1) (Plasminogen-binding protein) isoform 9 |
| XP_859448.1 | PREDICTED: similar to Regulating synaptic membrane exocytosis protein 2 (Rab3-interacting molecule 2) (RIM 2) isoform 12                                                                                                            |
| XP_859493.1 | PREDICTED: similar to RAF proto-oncogene serine/threonine-protein kinase (Raf-1) (C-RAF) (cRaf) isoform 10                                                                                                                          |
| XP_859517.1 | PREDICTED: similar to ankyrin repeat domain protein 15 isoform a isoform 3                                                                                                                                                          |
| XP_859578.1 | PREDICTED: similar to signal transducer and activator of transcription 3 isoform 1 isoform 9                                                                                                                                        |
| XP_859601.1 | PREDICTED: similar to Restin (Cytoplasmic linker protein-170 alpha-2) (CLIP-170) (Reed-Sternberg intermediate filament associated protein) isoform 11                                                                               |
| XP_859604.1 | PREDICTED: similar to homer homolog 1 isoform S isoform 3                                                                                                                                                                           |
| XP_859629.1 | PREDICTED: similar to Heterogeneous nuclear ribonucleoprotein A1 (Helix-destabilizing protein) (Single-strand binding protein) (hnRNP core protein A1) (HDP-1) (Topoisomerase-inhibitor suppressed) isoform 3                       |
| XP_859665.1 | PREDICTED: similar to membrane frizzled-related protein isoform 2                                                                                                                                                                   |
| XP_859679.1 | PREDICTED: similar to G6B protein isoform G6b-B precursor isoform 2                                                                                                                                                                 |
| XP_859685.1 | PREDICTED: similar to twinfilin-like protein isoform 5                                                                                                                                                                              |
| XP_859686.1 | PREDICTED: similar to Dedicator of cytokinesis protein 9 (Cdc42 guanine nucleotide exchange factor zizimin 1) isoform 5                                                                                                             |
| XP_859687.1 | PREDICTED: similar to phospholipase C beta 4 isoform a isoform 5                                                                                                                                                                    |
| XP_859697.1 | PREDICTED: similar to NADH dehydrogenase (ubiquinone) Fe-S protein 1, 75kDa precursor isoform 7                                                                                                                                     |
| XP_859726.1 | PREDICTED: similar to Secretory carrier-associated membrane protein 1 (Secretory carrier membrane protein 1) isoform 2                                                                                                              |
| XP_859739.1 | PREDICTED: hypothetical protein XP_854646                                                                                                                                                                                           |
| XP_859766.1 | PREDICTED: similar to Putative alpha-mannosidase C1orf22 isoform 3                                                                                                                                                                  |
| XP_859781.1 | PREDICTED: similar to synaptic vesicle glycoprotein 2 a isoform 2                                                                                                                                                                   |
| XP_859786.1 | PREDICTED: similar to Dedicator of cytokinesis protein 9 (Cdc42 guanine nucleotide exchange factor zizimin 1) isoform 8                                                                                                             |
| XP_859804.1 | PREDICTED: similar to Choline-phosphate cytidylyltransferase B (Phosphorylcholine transferase B) (CTP:phosphocholine cytidylyltransferase B) (CT B) (CCT B) (CCT-beta) isoform 3                                                    |
| XP_859805.1 | PREDICTED: hypothetical protein XP_854712                                                                                                                                                                                           |
| XP_859824.1 | PREDICTED: similar to Transmembrane 9 superfamily protein member 3 precursor (SM-11044 binding protein) (EP70-P-iso) isoform 4                                                                                                      |
| XP_859842.1 | PREDICTED: similar to a disintegrin and metalloproteinase domain 22 isoform 1 preproprotein isoform 6                                                                                                                               |
| XP_859857.1 | PREDICTED: similar to Microtubule-associated protein 1A (MAP 1A) (Proliferation-related protein p80) isoform 2                                                                                                                      |

|             |                                                                                                                                                                                                             |
|-------------|-------------------------------------------------------------------------------------------------------------------------------------------------------------------------------------------------------------|
| XP_859859.1 | PREDICTED: similar to Dynein intermediate chain 2, cytosolic (DH IC-2) (Cytoplasmic dynein intermediate chain 2) isoform 6                                                                                  |
| XP_859880.1 | PREDICTED: similar to Non-muscle caldesmon (CDM) (L-caldesmon) isoform 2                                                                                                                                    |
| XP_859913.1 | PREDICTED: similar to zinc finger protein 608 isoform 2                                                                                                                                                     |
| XP_859929.1 | PREDICTED: similar to mitogen-activated protein kinase 10 isoform 2 isoform 3                                                                                                                               |
| XP_859931.1 | PREDICTED: similar to Dynein intermediate chain 2, cytosolic (DH IC-2) (Cytoplasmic dynein intermediate chain 2) isoform 8                                                                                  |
| XP_859940.1 | PREDICTED: similar to Signal transducer and activator of transcription 5A isoform 8                                                                                                                         |
| XP_859943.1 | PREDICTED: similar to SWI/SNF-related matrix-associated actin-dependent regulator of chromatin a2 isoform b isoform 9                                                                                       |
| XP_859994.1 | PREDICTED: similar to gamma-aminobutyric acid (GABA-A) transporter 4 isoform 3                                                                                                                              |
| XP_859997.1 | PREDICTED: similar to chromosome 20 open reading frame 42 isoform 3                                                                                                                                         |
| XP_860008.1 | PREDICTED: similar to tubulin, beta 3 isoform 3                                                                                                                                                             |
| XP_860017.1 | PREDICTED: similar to transcriptional regulator ATRX isoform 1 isoform 3                                                                                                                                    |
| XP_860026.1 | PREDICTED: similar to microtubule-associated protein, RP/EB family, member 3 isoform 7                                                                                                                      |
| XP_860030.1 | PREDICTED: similar to gamma-aminobutyric acid (GABA-A) transporter 4 isoform 4                                                                                                                              |
| XP_860040.1 | PREDICTED: similar to synaptic vesicle glycoprotein 2c isoform 2                                                                                                                                            |
| XP_860049.1 | PREDICTED: similar to tubulin, beta 3 isoform 4                                                                                                                                                             |
| XP_860054.1 | PREDICTED: similar to signal transducer and activator of transcription 5B isoform 3                                                                                                                         |
| XP_860058.1 | PREDICTED: hypothetical protein XP_854965                                                                                                                                                                   |
| XP_860060.1 | PREDICTED: similar to Cell division protein kinase 4 (Cyclin-dependent kinase 4) (PSK-J3) isoform 4                                                                                                         |
| XP_860070.1 | PREDICTED: similar to dual specificity phosphatase 6 isoform b isoform 3                                                                                                                                    |
| XP_860081.1 | PREDICTED: similar to Dynein intermediate chain 2, cytosolic (DH IC-2) (Cytoplasmic dynein intermediate chain 2) isoform 12                                                                                 |
| XP_860122.1 | PREDICTED: similar to Guanine nucleotide-binding protein G(olf), alpha subunit (Adenylate cyclase-stimulating G alpha protein, olfactory type) isoform 9                                                    |
| XP_860137.1 | PREDICTED: similar to supervillin isoform 2 isoform 4                                                                                                                                                       |
| XP_860159.1 | PREDICTED: similar to Serine/threonine-protein kinase 12 (Aurora- and Ipl1-like midbody-associated protein 1) (AIM-1) (Aurora/IPL1-related kinase 2) (Aurora-related kinase 2) (STK-1) (Aurora-B) isoform 5 |
| XP_860209.1 | PREDICTED: similar to Mitochondrial carrier homolog 2 (Met-induced mitochondrial protein) isoform 2                                                                                                         |
| XP_860215.1 | PREDICTED: similar to MMS19-like (MET18 homolog, S. cerevisiae) isoform 6                                                                                                                                   |
| XP_860221.1 | PREDICTED: similar to myopalladin isoform 4                                                                                                                                                                 |
| XP_860228.1 | PREDICTED: similar to implantation-associated protein isoform 2                                                                                                                                             |
| XP_860289.1 | PREDICTED: similar to 3-hydroxy-3-methylglutaryl-coenzyme A reductase (HMG-CoA reductase) isoform 2                                                                                                         |
| XP_860302.1 | PREDICTED: similar to microtubule-associated protein tau isoform 4 isoform 3                                                                                                                                |
| XP_860306.1 | PREDICTED: similar to ATPase, Cu++ transporting, alpha polypeptide isoform 2                                                                                                                                |
| XP_860318.1 | PREDICTED: similar to propionyl-Coenzyme A carboxylase, alpha polypeptide precursor isoform 7                                                                                                               |
| XP_860342.1 | PREDICTED: similar to Mitochondrial carrier homolog 2 (Met-induced mitochondrial protein) isoform 6                                                                                                         |
| XP_860356.1 | PREDICTED: similar to eukaryotic translation initiation factor 4A2 isoform 3                                                                                                                                |
| XP_860357.1 | PREDICTED: similar to solute carrier family 25 (mitochondrial carrier, Aralar), member 12 isoform 5                                                                                                         |
| XP_860359.1 | PREDICTED: similar to UDP-Gal:betaGlcNAc beta 1,4-galactosyltransferase, polypeptide 3 isoform 4                                                                                                            |



|             |                                                                                                                                                                                                      |
|-------------|------------------------------------------------------------------------------------------------------------------------------------------------------------------------------------------------------|
| XP_860395.1 | PREDICTED: similar to Probable ATP-dependent RNA helicase DDX6 (DEAD-box protein 6) (ATP-dependent RNA helicase p54) (Oncogene RCK) isoform 3                                                        |
| XP_860399.1 | PREDICTED: similar to importin 4 isoform 2                                                                                                                                                           |
| XP_860400.1 | PREDICTED: similar to microtubule-associated protein tau isoform 2 isoform 6                                                                                                                         |
| XP_860410.1 | PREDICTED: similar to complement component 2 precursor isoform 5                                                                                                                                     |
| XP_860431.1 | PREDICTED: similar to Probable ATP-dependent RNA helicase DDX6 (DEAD-box protein 6) (ATP-dependent RNA helicase p54) (Oncogene RCK) isoform 4                                                        |
| XP_860433.1 | PREDICTED: similar to tubulin, beta 6 isoform 3                                                                                                                                                      |
| XP_860472.1 | PREDICTED: similar to phosphoglycerate kinase 1 isoform 5                                                                                                                                            |
| XP_860474.1 | PREDICTED: hypothetical protein XP_855381                                                                                                                                                            |
| XP_860482.1 | PREDICTED: similar to U4/U6 small nuclear ribonucleoprotein Prp3 (Pre-mRNA splicing factor 3) (U4/U6 snRNP 90 kDa protein) (hPrp3) isoform 4                                                         |
| XP_860502.1 | PREDICTED: similar to heterogeneous nuclear ribonucleoprotein H3 isoform a isoform 6                                                                                                                 |
| XP_860530.1 | PREDICTED: similar to 14-3-3 protein epsilon (14-3-3E) (Mitochondrial import stimulation factor L subunit) (MSF L) isoform 2                                                                         |
| XP_860549.1 | PREDICTED: similar to Zinc finger protein 198 (Fused in myeloproliferative disorders protein) (Rearranged in atypical myeloproliferative disorder protein) isoform 4                                 |
| XP_860552.1 | PREDICTED: similar to peptidylprolyl isomerase-like 2 isoform b isoform 4                                                                                                                            |
| XP_860566.1 | PREDICTED: similar to ADP-ribosylation factor 2 isoform 3                                                                                                                                            |
|             | PREDICTED: similar to 40S ribosomal protein SA (p40) (34/67 kDa laminin receptor) (Colon carcinoma laminin-binding protein) (NEM/1CHD4) (Multidrug resistance-associated protein MGr1-Ag) isoform 9  |
| XP_860584.1 |                                                                                                                                                                                                      |
| XP_860597.1 | PREDICTED: similar to nudE nuclear distribution gene E homolog like 1 (A. nidulans) isoform B isoform 3                                                                                              |
| XP_860634.1 | PREDICTED: similar to phosphoglycerate kinase 1 isoform 10                                                                                                                                           |
|             | PREDICTED: similar to 40S ribosomal protein SA (p40) (34/67 kDa laminin receptor) (Colon carcinoma laminin-binding protein) (NEM/1CHD4) (Multidrug resistance-associated protein MGr1-Ag) isoform 11 |
| XP_860646.1 |                                                                                                                                                                                                      |
| XP_860650.1 | PREDICTED: similar to ring finger protein 34 isoform 2 isoform 8                                                                                                                                     |
| XP_860674.1 | PREDICTED: similar to CG15160-PA isoform 3                                                                                                                                                           |
| XP_860727.1 | PREDICTED: similar to N-ethylmaleimide sensitive fusion protein isoform 4                                                                                                                            |
| XP_860745.1 | PREDICTED: similar to protein phosphatase methylesterase 1 isoform 4                                                                                                                                 |
|             | PREDICTED: similar to Mitogen-activated protein kinase 1 (Extracellular signal-regulated kinase 2) (ERK-2) (Mitogen-activated protein kinase 2) (MAP kinase 2) (MAPK 2) (p42-MAPK) (ERT1) isoform 7  |
| XP_860750.1 |                                                                                                                                                                                                      |
| XP_860769.1 | PREDICTED: hypothetical protein XP_855676                                                                                                                                                            |
| XP_860788.1 | PREDICTED: similar to interleukin 16 isoform 3                                                                                                                                                       |
| XP_860790.1 | PREDICTED: similar to eukaryotic translation initiation factor 4A2 isoform 15                                                                                                                        |
| XP_860805.1 | PREDICTED: similar to DNA-directed RNA polymerase II 140 kDa polypeptide (RNA polymerase II subunit 2) (RPB2) isoform 9                                                                              |
| XP_860812.1 | PREDICTED: similar to cell division cycle 25B isoform 2 isoform 6                                                                                                                                    |
| XP_860866.1 | PREDICTED: similar to Neurabin-1 (Neurabin-I) (Neural tissue-specific F-actin binding protein I) (Protein phosphatase 1 regulatory subunit 9A) isoform 4                                             |
| XP_860907.1 | PREDICTED: similar to thyroid hormone receptor interactor 12 isoform 4                                                                                                                               |
| XP_860911.1 | PREDICTED: similar to zinc finger, FYVE domain containing 27 isoform a isoform 2                                                                                                                     |
| XP_860926.1 | PREDICTED: similar to SWI/SNF-related matrix-associated actin-dependent regulator of chromatin a2 isoform b isoform 36                                                                               |
|             | PREDICTED: similar to Heterogeneous nuclear ribonucleoprotein A1 (Helix-destabilizing protein) (Single-strand binding protein) (hnRNP core protein A1) (HDP-1)                                       |
| XP_860940.1 | (Topoisomerase-inhibitor suppressed) isoform 3                                                                                                                                                       |

|             |                                                                                                                                                                  |
|-------------|------------------------------------------------------------------------------------------------------------------------------------------------------------------|
| XP_860949.1 | PREDICTED: similar to Transformation/transcription domain-associated protein (350/400 kDa PCAF-associated factor) (PAF350/400) (STAF40) (Tra1 homolog) isoform 3 |
| XP_860953.1 | PREDICTED: similar to neuro-oncological ventral antigen 1 isoform 2 isoform 5                                                                                    |
| XP_860955.1 | PREDICTED: similar to ATP-citrate synthase (ATP-citrate (pro-S-)-lyase) (Citrate cleavage enzyme) isoform 3                                                      |
| XP_860962.1 | PREDICTED: similar to eukaryotic translation initiation factor 3, subunit 3 gamma, 40kDa isoform 7                                                               |
| XP_860987.1 | PREDICTED: similar to casein kinase 1 epsilon isoform 7                                                                                                          |
| XP_861007.1 | PREDICTED: similar to CpG binding protein (Protein containing PHD finger and CXXC domain 1) (CXXC finger protein 1) isoform 6                                    |
| XP_861013.1 | PREDICTED: hypothetical protein XP_855920                                                                                                                        |
| XP_861016.1 | PREDICTED: similar to Pre-B-cell leukemia transcription factor-2 (Homeobox protein PBX2) (G17 protein) isoform 2                                                 |
| XP_861030.1 | PREDICTED: similar to sulfide dehydrogenase like isoform 3                                                                                                       |
| XP_861040.1 | PREDICTED: hypothetical protein XP_855947                                                                                                                        |
| XP_861051.1 | PREDICTED: similar to Receptor-type tyrosine-protein phosphatase alpha precursor (Protein-tyrosine phosphatase alpha) (R-PTP-alpha) isoform 3                    |
| XP_861057.1 | PREDICTED: similar to sulfide dehydrogenase like isoform 4                                                                                                       |
| XP_861061.1 | PREDICTED: similar to zinc finger, DHHC domain containing 7 isoform 2                                                                                            |
| XP_861084.1 | PREDICTED: similar to zinc finger, A20 domain containing 3 isoform 7                                                                                             |
| XP_861093.1 | PREDICTED: hypothetical protein XP_856000                                                                                                                        |
| XP_861110.1 | PREDICTED: similar to sulfide dehydrogenase like isoform 5                                                                                                       |
| XP_861114.1 | PREDICTED: similar to Core histone macro-H2A.2 (Histone macroH2A2) (mH2A2) isoform 5                                                                             |
| XP_861119.1 | PREDICTED: similar to tenascin R (restrictin, janusin) isoform 2                                                                                                 |
| XP_861124.1 | PREDICTED: hypothetical protein XP_856031                                                                                                                        |
| XP_861146.1 | PREDICTED: similar to BAI1-associated protein 2-like 1 isoform 5                                                                                                 |
| XP_861147.1 | PREDICTED: similar to RAB GTPase activating protein 1 isoform 2                                                                                                  |
| XP_861158.1 | PREDICTED: similar to dynein, cytoplasmic, intermediate polypeptide 1 isoform 3                                                                                  |
| XP_861160.1 | PREDICTED: similar to SWI/SNF related, matrix associated, actin dependent regulator of chromatin, subfamily d, member 3 isoform 1 isoform 8                      |
| XP_861171.1 | PREDICTED: similar to microtubule-associated protein 2 isoform 4 isoform 5                                                                                       |
| XP_861196.1 | PREDICTED: similar to Calcium binding protein 39 (Mo25 protein) isoform 5                                                                                        |
| XP_861208.1 | PREDICTED: similar to ubiquitin-binding protein homolog isoform 4                                                                                                |
| XP_861210.1 | PREDICTED: similar to CG2747-PB, isoform B isoform 2                                                                                                             |
| XP_861212.1 | PREDICTED: similar to ATP-citrate synthase (ATP-citrate (pro-S-)-lyase) (Citrate cleavage enzyme) isoform 12                                                     |
| XP_861224.1 | PREDICTED: similar to RNA-binding protein 5 (RNA binding motif protein 5) (Putative tumor suppressor LUCA15) (G15 protein) isoform 3                             |
| XP_861234.1 | PREDICTED: similar to ubiquitin-binding protein homolog isoform 5                                                                                                |
| XP_861246.1 | PREDICTED: similar to chondroitin sulfate glucuronyltransferase isoform 3                                                                                        |
| XP_861315.1 | PREDICTED: similar to unc-5 homolog B isoform 2                                                                                                                  |
| XP_861325.1 | PREDICTED: similar to DEAD-box protein 3, X-chromosomal (Helicase-like protein 2) (HLP2) (DEAD-box, X isoform) isoform 5                                         |
| XP_861339.1 | PREDICTED: similar to Elongation factor 1-gamma (EF-1-gamma) (eEF-1B gamma) isoform 11                                                                           |
| XP_861346.1 | PREDICTED: similar to neural stem cell-derived dendrite regulator isoform 2                                                                                      |
| XP_861357.1 | PREDICTED: similar to basic beta 1 syntrophin isoform 2                                                                                                          |

|             |                                                                                                                                                                                  |
|-------------|----------------------------------------------------------------------------------------------------------------------------------------------------------------------------------|
| XP_861388.1 | PREDICTED: similar to insulin induced gene 1 isoform 1 isoform 3                                                                                                                 |
| XP_861405.1 | PREDICTED: similar to cleavage stimulation factor subunit 2 isoform 5                                                                                                            |
| XP_861423.1 | PREDICTED: similar to CG10809-PA isoform 2                                                                                                                                       |
| XP_861436.1 | PREDICTED: similar to Protein CBFA2T1 (MTG8 protein) (ETO protein) (Eigh twenty one protein) (Cyclin D related protein) (Zinc finger MYND domain containing protein 2) isoform 5 |
| XP_861445.1 | PREDICTED: similar to Ubiquinol-cytochrome-c reductase complex core protein 2, mitochondrial precursor (Complex III subunit II) isoform 3                                        |
| XP_861465.1 | PREDICTED: similar to Enigma homolog (Enigma-like PDZ and LIM domains protein) isoform 3                                                                                         |
| XP_861475.1 | PREDICTED: similar to DEAD-box protein 3, X-chromosomal (Helicase-like protein 2) (HLP2) (DEAD-box, X isoform) isoform 9                                                         |
| XP_861490.1 | PREDICTED: similar to colonic and hepatic tumor over-expressed protein isoform a isoform 5                                                                                       |
| XP_861492.1 | PREDICTED: similar to chromosome 3 open reading frame 10 isoform 2                                                                                                               |
| XP_861508.1 | PREDICTED: similar to MAD homolog 7 isoform 4                                                                                                                                    |
| XP_861514.1 | PREDICTED: hypothetical protein XP_856421                                                                                                                                        |
| XP_861523.1 | PREDICTED: similar to Actin-related protein 2/3 complex subunit 3 (ARP2/3 complex 21 kDa subunit) (p21-ARC) isoform 2                                                            |
| XP_861551.1 | PREDICTED: similar to oxysterol-binding protein-like protein 10 isoform 3                                                                                                        |
| XP_861556.1 | PREDICTED: similar to Solute carrier family 12, member 1 (Bumetanide-sensitive sodium-(potassium)-chloride cotransporter 2) (Kidney-specific Na-K-Cl symporter) isoform 7        |
| XP_861569.1 | PREDICTED: similar to katanin p60 subunit A 1 isoform 7                                                                                                                          |
| XP_861581.1 | PREDICTED: similar to isocitrate dehydrogenase 3, beta subunit isoform b precursor isoform 6                                                                                     |
| XP_861585.1 | PREDICTED: hypothetical protein XP_856492 isoform 2                                                                                                                              |
| XP_861600.1 | PREDICTED: hypothetical protein XP_856507                                                                                                                                        |
| XP_861618.1 | PREDICTED: similar to PDZ and LIM domain 5 isoform ENH2 isoform 7                                                                                                                |
| XP_861624.1 | PREDICTED: similar to Probable RNA-dependent helicase p68 (DEAD-box protein p68) (DEAD-box protein 5) isoform 6                                                                  |
| XP_861630.1 | PREDICTED: hypothetical protein XP_856537                                                                                                                                        |
| XP_861673.1 | PREDICTED: hypothetical protein XP_856580 isoform 3                                                                                                                              |
| XP_861680.1 | PREDICTED: similar to cytoplasmic beta-actin isoform 4                                                                                                                           |
| XP_861700.1 | PREDICTED: similar to source of immunodominant MHC-associated peptides isoform 3                                                                                                 |
| XP_861703.1 | PREDICTED: similar to Microspherule protein 1 (58 kDa microspherule protein) (Cell cycle-regulated factor p78) isoform 4                                                         |
| XP_861709.1 | PREDICTED: similar to Heterogeneous nuclear ribonucleoprotein A1 (Helix-destabilizing protein) (Single-strand binding protein) (hnRNP core protein A1) (HDP) isoform 3           |
| XP_861732.1 | PREDICTED: similar to trinucleotide repeat containing 15 isoform 4                                                                                                               |
| XP_861748.1 | PREDICTED: hypothetical protein XP_856655                                                                                                                                        |
| XP_861788.1 | PREDICTED: similar to trinucleotide repeat containing 15 isoform 6                                                                                                               |
| XP_861792.1 | PREDICTED: similar to Fibrillin-1 precursor isoform 6                                                                                                                            |
| XP_861793.1 | PREDICTED: similar to Enigma homolog (Enigma-like PDZ and LIM domains protein) isoform 13                                                                                        |
| XP_861827.1 | PREDICTED: similar to cytoplasmic beta-actin isoform 8                                                                                                                           |
| XP_861828.1 | PREDICTED: similar to dynamin 3 isoform 3                                                                                                                                        |
| XP_861831.1 | PREDICTED: similar to Bruton agammaglobulinemia tyrosine kinase isoform 8                                                                                                        |
| XP_861856.1 | PREDICTED: similar to cytoplasmic beta-actin isoform 9                                                                                                                           |

|             |                                                                                                                                                                              |
|-------------|------------------------------------------------------------------------------------------------------------------------------------------------------------------------------|
| XP_861877.1 | PREDICTED: similar to peripherin isoform 2                                                                                                                                   |
| XP_861880.1 | PREDICTED: similar to heterogeneous nuclear ribonucleoprotein A3 isoform 6                                                                                                   |
| XP_861917.1 | PREDICTED: hypothetical protein XP_856824                                                                                                                                    |
| XP_861944.1 | PREDICTED: similar to squalene monooxygenase isoform 2                                                                                                                       |
| XP_861946.1 | PREDICTED: similar to BRAF35/HDAC2 complex isoform 6                                                                                                                         |
| XP_861950.1 | PREDICTED: similar to tubulin, alpha 1 isoform 3                                                                                                                             |
| XP_861979.1 | PREDICTED: similar to tubulin, alpha 1 isoform 4                                                                                                                             |
| XP_862007.1 | PREDICTED: similar to DNA polymerase lambda (Pol Lambda) (DNA polymerase kappa) (DNA polymerase beta-2) (Pol beta2) isoform 4                                                |
| XP_862043.1 | PREDICTED: similar to tubulin, alpha 1 isoform 5                                                                                                                             |
| XP_862075.1 | PREDICTED: similar to eukaryotic translation initiation factor 5A2 isoform 2                                                                                                 |
| XP_862093.1 | PREDICTED: similar to PDZ protein Mrt1 isoform 3                                                                                                                             |
| XP_862096.1 | PREDICTED: similar to stromal interaction molecule 1 precursor isoform 4                                                                                                     |
| XP_862101.1 | PREDICTED: similar to RAP1, GTP-GDP dissociation stimulator 1 isoform 7                                                                                                      |
| XP_862103.1 | PREDICTED: similar to heterogeneous nuclear ribonucleoprotein A3 isoform 13                                                                                                  |
| XP_862115.1 | PREDICTED: similar to RNA-binding protein 9 (RNA binding motif protein 9) (Hexaribonucleotide binding protein 2) (Repressor of tamoxifen transcriptional activity) isoform 8 |
| XP_862128.1 | PREDICTED: similar to heterogeneous nuclear ribonucleoprotein A3 isoform 14                                                                                                  |
| XP_862136.1 | PREDICTED: similar to Importin alpha-2 subunit (Karyopherin alpha-2 subunit) (SRP1-alpha) (RAG cohort protein 1) isoform 6                                                   |
| XP_862142.1 | PREDICTED: similar to RNA-binding protein 9 (RNA binding motif protein 9) (Hexaribonucleotide binding protein 2) (Repressor of tamoxifen transcriptional activity) isoform 9 |
| XP_862162.1 | PREDICTED: hypothetical protein XP_857069                                                                                                                                    |
| XP_862163.1 | PREDICTED: similar to opioid receptor, mu 1 isoform MOR-1A isoform 2                                                                                                         |
| XP_862193.1 | PREDICTED: hypothetical protein XP_857100, partial                                                                                                                           |
| XP_862266.1 | PREDICTED: similar to L-lactate dehydrogenase B chain (LDH-B) (LDH heart subunit) (LDH-H) isoform 3                                                                          |
| XP_862267.1 | PREDICTED: hypothetical protein XP_857174                                                                                                                                    |
| XP_862314.1 | PREDICTED: similar to Zinc finger protein Helios isoform 3                                                                                                                   |
| XP_862324.1 | PREDICTED: similar to Target of Myb protein 1 isoform 2                                                                                                                      |
| XP_862326.1 | PREDICTED: similar to L-lactate dehydrogenase B chain (LDH-B) (LDH heart subunit) (LDH-H) isoform 3                                                                          |
| XP_862334.1 | PREDICTED: similar to Dihydropteridine reductase (HDHPR) (Quinoid dihydropteridine reductase) isoform 3                                                                      |
| XP_862336.1 | PREDICTED: similar to TRAF2 and NCK interacting kinase isoform 11                                                                                                            |
| XP_862357.1 | PREDICTED: similar to two pore segment channel 1 isoform 3                                                                                                                   |
| XP_862370.1 | PREDICTED: similar to GTPase activating Rap/RanGAP domain-like 1 isoform 2 isoform 4                                                                                         |
| XP_862372.1 | PREDICTED: similar to keratin 13 isoform a isoform 6                                                                                                                         |
| XP_862398.1 | PREDICTED: similar to Voltage-dependent calcium channel gamma-5 subunit (Neuronal voltage-gated calcium channel gamma-5 subunit) isoform 2                                   |
| XP_862407.1 | PREDICTED: similar to PHD finger protein 20-like 1 isoform 1 isoform 5                                                                                                       |
| XP_862432.1 | PREDICTED: similar to Ezrin (p81) (Cyto villin) (Villin-2) isoform 5                                                                                                         |
| XP_862475.1 | PREDICTED: similar to Zinc finger protein Helios isoform 9                                                                                                                   |
| XP_862513.1 | PREDICTED: similar to synapsin III isoform IIIa isoform 3                                                                                                                    |

|             |                                                                                                                                                    |
|-------------|----------------------------------------------------------------------------------------------------------------------------------------------------|
| XP_862537.1 | PREDICTED: similar to rap2 interacting protein x isoform 7                                                                                         |
| XP_862586.1 | PREDICTED: similar to Superoxide dismutase [Mn], mitochondrial precursor isoform 4                                                                 |
| XP_862604.1 | PREDICTED: similar to smooth muscle myosin heavy chain 11 isoform SM1 isoform 16                                                                   |
| XP_862629.1 | PREDICTED: similar to PHD finger protein 20-like 1 isoform 1 isoform 14                                                                            |
| XP_862637.1 | PREDICTED: similar to TAO kinase 3 isoform 6                                                                                                       |
| XP_862639.1 | PREDICTED: similar to LIM domain-binding protein 1 (Nuclear LIM interactor) isoform 4                                                              |
| XP_862658.1 | PREDICTED: similar to Xanthine dehydrogenase/oxidase isoform 7                                                                                     |
| XP_862663.1 | PREDICTED: similar to lipocalin-interacting membrane receptor isoform 6                                                                            |
| XP_862668.1 | PREDICTED: similar to radixin isoform 5                                                                                                            |
| XP_862675.1 | PREDICTED: similar to T-complex protein 1, alpha subunit (TCP-1-alpha) (CCT-alpha) isoform 4                                                       |
| XP_862679.1 | PREDICTED: similar to retinoid X receptor, beta isoform 11                                                                                         |
| XP_862680.1 | PREDICTED: similar to SRC-like-adaptor (Src-like-adaptor protein 1) (hSLAP) isoform 3                                                              |
| XP_862689.1 | PREDICTED: similar to tripartite motif-containing 3 isoform 3                                                                                      |
| XP_862698.1 | PREDICTED: similar to radixin isoform 6                                                                                                            |
| XP_862714.1 | PREDICTED: similar to TAO kinase 3 isoform 9                                                                                                       |
| XP_862725.1 | PREDICTED: similar to T-complex protein 1, alpha subunit (TCP-1-alpha) (CCT-alpha) isoform 6                                                       |
| XP_862727.1 | PREDICTED: similar to retinoid X receptor, beta isoform 13                                                                                         |
| XP_862775.1 | PREDICTED: similar to Zinc finger protein 81 (HFZ20) isoform 2                                                                                     |
| XP_862791.1 | PREDICTED: similar to transient receptor potential cation channel, subfamily M, member 7 isoform 4                                                 |
| XP_862800.1 | PREDICTED: hypothetical protein XP_857707                                                                                                          |
| XP_862803.1 | PREDICTED: similar to heterogeneous nuclear ribonucleoprotein A0 isoform 3                                                                         |
| XP_862807.1 | PREDICTED: similar to capping protein (actin filament) muscle Z-line, alpha 1 isoform 4                                                            |
| XP_862829.1 | PREDICTED: similar to twist gene homolog 1 isoform 4                                                                                               |
| XP_862832.1 | PREDICTED: similar to capping protein (actin filament) muscle Z-line, alpha 1 isoform 5                                                            |
| XP_862850.1 | PREDICTED: similar to Protein C5orf5 (GAP-like protein N61) isoform 3                                                                              |
| XP_862870.1 | PREDICTED: hypothetical protein XP_857777                                                                                                          |
| XP_862902.1 | PREDICTED: similar to ADP-ribosylation factor 3 isoform 2                                                                                          |
| XP_862934.1 | PREDICTED: similar to GTPase activating Rap/RanGAP domain-like 3 isoform 3                                                                         |
| XP_862942.1 | PREDICTED: similar to Sp4 transcription factor isoform 3                                                                                           |
| XP_862947.1 | PREDICTED: similar to Short palate, lung and nasal epithelium carcinoma associated protein 2 precursor (Parotid secretory protein) (PSP) isoform 2 |
| XP_862970.1 | PREDICTED: similar to Arfaptin-2 (ADP-ribosylation factor interacting protein 2) (Partner of RAC1) (POR1 protein) isoform 9                        |
| XP_862971.1 | PREDICTED: similar to Short palate, lung and nasal epithelium carcinoma associated protein 2 precursor (Parotid secretory protein) (PSP) isoform 3 |
| XP_862973.1 | PREDICTED: similar to Tropomodulin-3 (Ubiquitous tropomodulin) (U-Tmod) isoform 2                                                                  |
| XP_862982.1 | PREDICTED: similar to Zinc finger protein 432 isoform 3                                                                                            |
| XP_862983.1 | PREDICTED: similar to LIM and senescent cell antigen-like domains 1 isoform 4                                                                      |
| XP_863003.1 | PREDICTED: similar to limkain b1 isoform 1 isoform 2                                                                                               |

|             |                                                                                                                                                               |
|-------------|---------------------------------------------------------------------------------------------------------------------------------------------------------------|
| XP_863016.1 | PREDICTED: similar to ADP-ribosylation factor interacting protein 2 (arfaptin 2) isoform 11                                                                   |
| XP_863024.1 | PREDICTED: similar to Collagen alpha 1(III) chain precursor isoform 8                                                                                         |
| XP_863028.1 | PREDICTED: similar to DEAH (Asp-Glu-Ala-His) box polypeptide 38 isoform 6                                                                                     |
| XP_863031.1 | PREDICTED: similar to WD repeat domain 13 protein isoform 4                                                                                                   |
| XP_863047.1 | PREDICTED: similar to Amyloid beta A4 precursor protein-binding family B member 2 (Fe65-like protein) isoform 3                                               |
| XP_863051.1 | PREDICTED: similar to Glutamate receptor 4 precursor (GluR-4) (GluR4) (GluR-D) (Glutamate receptor ionotropic, AMPA 4) isoform 7                              |
| XP_863059.1 | PREDICTED: hypothetical protein XP_857966                                                                                                                     |
| XP_863066.1 | PREDICTED: similar to Ras-related protein Rap-1A (Ras-related protein Krev-1) isoform 2                                                                       |
| XP_863082.1 | PREDICTED: similar to DNA topoisomerase II, alpha isozyme isoform 3                                                                                           |
| XP_863087.1 | PREDICTED: similar to Sulfotransferase K1 (rSULT1C2) isoform 2                                                                                                |
| XP_863096.1 | PREDICTED: similar to integrin linked kinase isoform 4                                                                                                        |
| XP_863103.1 | PREDICTED: similar to Collagen alpha 1(III) chain precursor isoform 10                                                                                        |
| XP_863125.1 | PREDICTED: similar to 5-aminoimidazole-4-carboxamide ribonucleotide formyltransferase/IMP cyclohydrolase isoform 6                                            |
| XP_863132.1 | PREDICTED: similar to acyl-CoA synthetase long-chain family member 4 isoform 2 isoform 3                                                                      |
| XP_863133.1 | PREDICTED: hypothetical protein XP_858040                                                                                                                     |
| XP_863136.1 | PREDICTED: similar to SBBI26 protein isoform 2 isoform 3                                                                                                      |
| XP_863139.1 | PREDICTED: similar to Troponin T, fast skeletal muscle (TnTf) (Fast skeletal muscle troponin T) (fTnT) isoform 4                                              |
| XP_863148.1 | PREDICTED: similar to Collagen alpha 1(III) chain precursor isoform 12                                                                                        |
| XP_863156.1 | PREDICTED: similar to Stress-activated map kinase interacting protein 1 (SAPK interacting protein 1) (Putative Ras inhibitor JC310) isoform 4                 |
| XP_863182.1 | PREDICTED: similar to myeloid translocation gene-related protein 1 isoform MTGR1a isoform 6                                                                   |
| XP_863187.1 | PREDICTED: similar to dynein, cytoplasmic, heavy polypeptide 2 isoform 3                                                                                      |
| XP_863190.1 | PREDICTED: similar to RNA binding motif protein 3 isoform 3                                                                                                   |
| XP_863201.1 | PREDICTED: similar to guanine nucleotide binding protein, alpha activating polypeptide O isoform 3                                                            |
| XP_863205.1 | PREDICTED: similar to myeloid translocation gene-related protein 1 isoform MTGR1a isoform 7                                                                   |
| XP_863209.1 | PREDICTED: similar to calcium/calmodulin-dependent protein kinase II gamma isoform 3 isoform 8                                                                |
| XP_863216.1 | PREDICTED: similar to cancer susceptibility candidate 3 isoform 2                                                                                             |
| XP_863224.1 | PREDICTED: similar to IGF-II mRNA-binding protein 3 isoform 2                                                                                                 |
| XP_863225.1 | PREDICTED: similar to Guanine nucleotide-binding protein G(o), alpha subunit 2 isoform 4                                                                      |
| XP_863232.1 | PREDICTED: similar to Guanine nucleotide-binding protein beta subunit 5 (Transducin beta chain 5) (Gbeta5) isoform 3                                          |
| XP_863246.1 | PREDICTED: similar to protein kinase, cAMP dependent regulatory, type II alpha isoform 7                                                                      |
| XP_863247.1 | PREDICTED: similar to G2/mitotic-specific cyclin B1 isoform 3                                                                                                 |
| XP_863255.1 | PREDICTED: similar to RAC-gamma serine/threonine-protein kinase (RAC-PK-gamma) (Protein kinase Akt-3) (Protein kinase B, gamma) (PKB gamma) (STK-2) isoform 3 |
| XP_863269.1 | PREDICTED: hypothetical protein XP_858176 isoform 2                                                                                                           |
| XP_863281.1 | PREDICTED: hypothetical protein XP_858188                                                                                                                     |
| XP_863285.1 | PREDICTED: similar to ankyrin repeat domain protein 17 isoform a isoform 8                                                                                    |
| XP_863286.1 | PREDICTED: similar to IGF-II mRNA-binding protein 3 isoform 4                                                                                                 |

|             |                                                                                                                                                                                                                     |
|-------------|---------------------------------------------------------------------------------------------------------------------------------------------------------------------------------------------------------------------|
| XP_863325.1 | PREDICTED: similar to IGF-II mRNA-binding protein 3 isoform 6                                                                                                                                                       |
| XP_863330.1 | PREDICTED: similar to ubiquinol-cytochrome c reductase core protein I isoform 3                                                                                                                                     |
| XP_863351.1 | PREDICTED: similar to Mitochondrial chaperone BCS1 (BCS1-like protein) (H-BCS1) isoform 2                                                                                                                           |
| XP_863364.1 | PREDICTED: similar to Early growth response protein 1 (EGR-1) (Krox-24 protein) (ZIF268) (Nerve growth factor-induced protein A) (NGFI-A) (Transcription factor ETR103) (Zinc finger protein 225) (AT225) isoform 4 |
| XP_863367.1 | PREDICTED: similar to CG2747-PB, isoform B isoform 6                                                                                                                                                                |
| XP_863387.1 | PREDICTED: similar to myosin binding protein C, fast-type isoform 3                                                                                                                                                 |
| XP_863416.1 | PREDICTED: similar to Eukaryotic translation initiation factor 2 subunit 2 (Eukaryotic translation initiation factor 2 beta subunit) (eIF-2-beta) isoform 6                                                         |
| XP_863417.1 | PREDICTED: similar to dynein, cytoplasmic, light peptide isoform 4                                                                                                                                                  |
| XP_863423.1 | PREDICTED: similar to CG14535-PA isoform 2                                                                                                                                                                          |
| XP_863472.1 | PREDICTED: similar to transcription factor B2, mitochondrial (predicted) isoform 2                                                                                                                                  |
| XP_863475.1 | PREDICTED: similar to CG6091-PA, isoform A isoform 5                                                                                                                                                                |
| XP_863540.1 | PREDICTED: similar to Liprin-alpha 1 (Protein tyrosine phosphatase receptor type f polypeptide-interacting protein alpha 1) (PTPRF-interacting protein alpha 1) (LAR-interacting protein 1) (LIP.1) isoform 3       |
| XP_863561.1 | PREDICTED: similar to Stress-70 protein, mitochondrial precursor (75 kDa glucose regulated protein) (GRP 75) (Peptide-binding protein 74) (PBP74) (Mortalin) (MOT) isoform 8                                        |
| XP_863564.1 | PREDICTED: similar to ADP-ribosylation factor-like 6 interacting protein 2 isoform 4                                                                                                                                |
| XP_863566.1 | PREDICTED: similar to CEGP1 protein isoform 5                                                                                                                                                                       |
| XP_863569.1 | PREDICTED: similar to Cytosolic purine 5-nucleotidase (5-nucleotidase cytosolic II) isoform 7                                                                                                                       |
| XP_863578.1 | PREDICTED: hypothetical protein XP_858485                                                                                                                                                                           |
| XP_863601.1 | PREDICTED: similar to NIMA (never in mitosis gene a)-related expressed kinase 6 isoform 3                                                                                                                           |
| XP_863624.1 | PREDICTED: similar to CDC42-binding protein kinase alpha isoform B isoform 7                                                                                                                                        |
| XP_863625.1 | PREDICTED: similar to Growth factor receptor-bound protein 7 (GRB7 adapter protein) (Epidermal growth factor receptor GRB-7) (B47) isoform 5                                                                        |
| XP_863628.1 | PREDICTED: hypothetical protein XP_858535                                                                                                                                                                           |
| XP_863630.1 | PREDICTED: similar to polynucleotide kinase 3-phosphatase isoform 2                                                                                                                                                 |
| XP_863647.1 | PREDICTED: similar to inositol polyphosphate-4-phosphatase, type 1 isoform b isoform 2                                                                                                                              |
| XP_863680.1 | PREDICTED: similar to itchy homolog E3 ubiquitin protein ligase isoform 9                                                                                                                                           |
| XP_863694.1 | PREDICTED: similar to sporulation-induced transcript 4-associated protein isoform 7                                                                                                                                 |
| XP_863716.1 | PREDICTED: similar to phosphorylase kinase beta isoform 2                                                                                                                                                           |
| XP_863741.1 | PREDICTED: similar to phosphorylase kinase beta isoform 3                                                                                                                                                           |
| XP_863754.1 | PREDICTED: similar to transcription factor binding to IGHM enhancer 3 isoform 12                                                                                                                                    |
| XP_863757.1 | PREDICTED: similar to prostate tumor overexpressed gene 1 isoform 3                                                                                                                                                 |
| XP_863780.1 | PREDICTED: hypothetical protein XP_858687                                                                                                                                                                           |
| XP_863800.1 | PREDICTED: hypothetical protein XP_858707                                                                                                                                                                           |
| XP_863833.1 | PREDICTED: similar to calcium-transporting ATPase 2C1 isoform 1a isoform 12                                                                                                                                         |
| XP_863845.1 | PREDICTED: similar to Stress-70 protein, mitochondrial precursor (75 kDa glucose regulated protein) (GRP 75) (Peptide-binding protein 74) (PBP74) (Mortalin) (MOT) isoform 21                                       |

|             |                                                                                                                                                                                                                                                                            |
|-------------|----------------------------------------------------------------------------------------------------------------------------------------------------------------------------------------------------------------------------------------------------------------------------|
| XP_863846.1 | PREDICTED: similar to Zinc finger protein 76 isoform 3                                                                                                                                                                                                                     |
| XP_863854.1 | PREDICTED: similar to microtubule-associated protein 1 light chain 3 alpha isoform 2                                                                                                                                                                                       |
| XP_863881.1 | PREDICTED: similar to ankyrin 2 isoform 2 isoform 9                                                                                                                                                                                                                        |
| XP_863923.1 | PREDICTED: similar to Putative pre-mRNA splicing factor RNA helicase (DEAH box protein 15) isoform 3                                                                                                                                                                       |
| XP_863929.1 | PREDICTED: similar to H3 histone, family 3B isoform 3                                                                                                                                                                                                                      |
| XP_863933.1 | PREDICTED: similar to plastin 3 isoform 5                                                                                                                                                                                                                                  |
| XP_863952.1 | PREDICTED: similar to RAB GTPase activating protein 1 isoform 4                                                                                                                                                                                                            |
| XP_863961.1 | PREDICTED: similar to nephronophthisis 3 isoform 6                                                                                                                                                                                                                         |
| XP_864010.1 | PREDICTED: hypothetical protein XP_858917                                                                                                                                                                                                                                  |
| XP_864019.1 | PREDICTED: similar to Vacuolar proton translocating ATPase 116 kDa subunit a isoform 3 (V-ATPase 116-kDa isoform a3) (Osteoclastic proton pump 116 kDa subunit) (OC-116 KDa) (OC116) (T-cell immune regulator 1) (T cell immune response cDNA7 protein) (TIRC7)... isoform |
| XP_864022.1 | PREDICTED: similar to Phakinin (Beaded filament structural protein 2) (Lens fiber cell beaded filament protein CP 49) (CP49) (49 kDa cytoskeletal protein) (CP 47) (CP47) (Lens intermediate filament like-light) (LIFL-L) isoform 3                                       |
| XP_864028.1 | PREDICTED: similar to Phenylalanyl-tRNA synthetase beta chain (Phenylalanine--tRNA ligase beta chain) (PheRS) isoform 2                                                                                                                                                    |
| XP_864031.1 | PREDICTED: similar to butyrate response factor 2 isoform 3                                                                                                                                                                                                                 |
| XP_864036.1 | PREDICTED: similar to T-cell, immune regulator 1 isoform a isoform 3                                                                                                                                                                                                       |
| XP_864045.1 | PREDICTED: similar to Phenylalanyl-tRNA synthetase beta chain (Phenylalanine--tRNA ligase beta chain) (PheRS) isoform 3                                                                                                                                                    |
| XP_864070.1 | PREDICTED: hypothetical protein XP_858977                                                                                                                                                                                                                                  |
| XP_864109.1 | PREDICTED: similar to membrane associated DNA binding protein isoform 6                                                                                                                                                                                                    |
| XP_864137.1 | PREDICTED: similar to IBR domain containing 3 isoform 6                                                                                                                                                                                                                    |
| XP_864141.1 | PREDICTED: similar to ubiquitin protein ligase E3B isoform a isoform 4                                                                                                                                                                                                     |
| XP_864149.1 | PREDICTED: hypothetical protein XP_859056                                                                                                                                                                                                                                  |
| XP_864158.1 | PREDICTED: similar to huntingtin interacting protein B isoform 1 isoform 11                                                                                                                                                                                                |
| XP_864176.1 | PREDICTED: similar to activating signal cointegrator 1 complex subunit 3-like 1 isoform 6                                                                                                                                                                                  |
| XP_864179.1 | PREDICTED: similar to Protein MICAL-2 isoform 2                                                                                                                                                                                                                            |
| XP_864192.1 | PREDICTED: similar to solute carrier family 25, member 5 isoform 6                                                                                                                                                                                                         |
| XP_864198.1 | PREDICTED: similar to eukaryotic translation elongation factor 1 gamma isoform 4                                                                                                                                                                                           |
| XP_864218.1 | PREDICTED: hypothetical protein XP_859125                                                                                                                                                                                                                                  |
| XP_864221.1 | PREDICTED: similar to Band 4.1-like protein 2 (Generally expressed protein 4.1) (4.1G) isoform 8                                                                                                                                                                           |
| XP_864238.1 | PREDICTED: similar to modulator of estrogen induced transcription isoform a isoform 10                                                                                                                                                                                     |
| XP_864250.1 | PREDICTED: similar to heterogeneous nuclear ribonucleoprotein A2/B1 isoform 2 isoform 20                                                                                                                                                                                   |
| XP_864285.1 | PREDICTED: similar to Ran-binding protein 10 isoform 2                                                                                                                                                                                                                     |
| XP_864286.1 | PREDICTED: similar to heterogeneous nuclear ribonucleoprotein A3 isoform 4                                                                                                                                                                                                 |
| XP_864309.1 | PREDICTED: similar to CG2843-PA isoform 2                                                                                                                                                                                                                                  |
| XP_864311.1 | PREDICTED: hypothetical protein XP_859218                                                                                                                                                                                                                                  |
| XP_864326.1 | PREDICTED: similar to phosphoribosyl pyrophosphate synthetase-associated protein 2 isoform 7                                                                                                                                                                               |



|             |                                                                                                                                                                                                                                 |
|-------------|---------------------------------------------------------------------------------------------------------------------------------------------------------------------------------------------------------------------------------|
| XP_864327.1 | PREDICTED: similar to Ran-binding protein 10 isoform 4                                                                                                                                                                          |
| XP_864332.1 | PREDICTED: similar to Septin-6 isoform 2                                                                                                                                                                                        |
| XP_864342.1 | PREDICTED: similar to Myosin light polypeptide 3 (Myosin light chain 1, slow-twitch muscle B/ventricular isoform) (MLC1SB) (Ventricular/slow twitch myosin alkali light chain) (Cardiac myosin light chain-1) (CMLC1) isoform 3 |
| XP_864356.1 | PREDICTED: hypothetical protein XP_859263                                                                                                                                                                                       |
| XP_864374.1 | PREDICTED: similar to Septin-6 isoform 4                                                                                                                                                                                        |
| XP_864375.1 | PREDICTED: hypothetical protein XP_859282                                                                                                                                                                                       |
| XP_864392.1 | PREDICTED: similar to phosphoribosyl pyrophosphate synthetase-associated protein 2 isoform 10                                                                                                                                   |
| XP_864393.1 | PREDICTED: similar to ATPase, H <sup>+</sup> transporting, lysosomal, V0 subunit D isoform 1 isoform 2                                                                                                                          |
| XP_864394.1 | PREDICTED: similar to semaphorin B isoform 2                                                                                                                                                                                    |
| XP_864396.1 | PREDICTED: similar to karyopherin beta 1 isoform 3                                                                                                                                                                              |
| XP_864398.1 | PREDICTED: hypothetical protein XP_859305                                                                                                                                                                                       |
| XP_864399.1 | PREDICTED: similar to TEA domain family member 2 isoform 6                                                                                                                                                                      |
| XP_864417.1 | PREDICTED: hypothetical protein XP_859324                                                                                                                                                                                       |
| XP_864436.1 | PREDICTED: similar to karyopherin beta 1 isoform 5                                                                                                                                                                              |
| XP_864439.1 | PREDICTED: hypothetical protein XP_859346                                                                                                                                                                                       |
| XP_864440.1 | PREDICTED: hypothetical protein XP_859347                                                                                                                                                                                       |
| XP_864457.1 | PREDICTED: hypothetical protein XP_859364                                                                                                                                                                                       |
| XP_864472.1 | PREDICTED: hypothetical protein XP_859379                                                                                                                                                                                       |
| XP_864474.1 | PREDICTED: similar to Glycine dehydrogenase [decarboxylating], mitochondrial precursor (Glycine decarboxylase) (Glycine cleavage system P-protein) isoform 3                                                                    |
| XP_864476.1 | PREDICTED: similar to methyltransferase like 3 isoform 9                                                                                                                                                                        |
| XP_864489.1 | PREDICTED: similar to eukaryotic translation initiation factor 4A, isoform 1 isoform 3                                                                                                                                          |
| XP_864524.1 | PREDICTED: hypothetical protein XP_859431                                                                                                                                                                                       |
| XP_864536.1 | PREDICTED: similar to Contactin 1 precursor (Neural cell surface protein F3) (Glycoprotein gp135) isoform 5                                                                                                                     |
| XP_864560.1 | PREDICTED: hypothetical protein XP_859467                                                                                                                                                                                       |
| XP_864588.1 | PREDICTED: similar to splicing coactivator subunit SRm300 isoform 2                                                                                                                                                             |
| XP_864592.1 | PREDICTED: hypothetical protein XP_859499                                                                                                                                                                                       |
| XP_864603.1 | PREDICTED: similar to Leucine-rich repeat protein SHOC-2 (Ras-binding protein Sur-8) isoform 2                                                                                                                                  |
| XP_864605.1 | PREDICTED: similar to pulmonary surfactant-associated protein D precursor isoform 2                                                                                                                                             |
| XP_864622.1 | PREDICTED: similar to Leucine-rich repeat protein SHOC-2 (Ras-binding protein Sur-8) isoform 3                                                                                                                                  |
| XP_864635.1 | PREDICTED: similar to alpha isoform of regulatory subunit B, protein phosphatase 2 isoform 2 isoform 2                                                                                                                          |
| XP_864657.1 | PREDICTED: similar to PC4 and SFRS1 interacting protein 1 isoform 1 isoform 3                                                                                                                                                   |
| XP_864660.1 | PREDICTED: similar to Nucleosome assembly protein 1-like 1 (NAP-1 related protein) (hNRP) isoform 7                                                                                                                             |
| XP_864694.1 | PREDICTED: hypothetical protein XP_859601                                                                                                                                                                                       |
| XP_864712.1 | PREDICTED: similar to DNA mismatch repair protein Msh2 (MutS protein homolog 2) isoform 2                                                                                                                                       |
| XP_864728.1 | PREDICTED: hypothetical protein XP_859635                                                                                                                                                                                       |

|             |                                                                                                                                                                                   |
|-------------|-----------------------------------------------------------------------------------------------------------------------------------------------------------------------------------|
| XP_864773.1 | PREDICTED: similar to putative MAPK activating protein PM20,PM21 isoform 2 isoform 2                                                                                              |
| XP_864779.1 | PREDICTED: similar to talin 2 isoform 7                                                                                                                                           |
| XP_864782.1 | PREDICTED: similar to RNA-binding protein S1, serine-rich domain isoform 4                                                                                                        |
| XP_864798.1 | PREDICTED: similar to Heterogeneous nuclear ribonucleoprotein A1 (Helix-destabilizing protein) (Single-strand binding protein) (hnRNP core protein A1) (HDP) isoform 5            |
| XP_864799.1 | PREDICTED: similar to nebulin-related anchoring protein isoform S isoform 4                                                                                                       |
| XP_864841.1 | PREDICTED: hypothetical protein XP_859748, partial                                                                                                                                |
| XP_864848.1 | PREDICTED: similar to LIM domain binding 3 isoform 3                                                                                                                              |
| XP_864867.1 | PREDICTED: similar to NHL repeat containing 2 isoform 3                                                                                                                           |
| XP_864872.1 | PREDICTED: similar to ring finger and WD repeat domain 1 isoform 1 isoform 3                                                                                                      |
| XP_864873.1 | PREDICTED: similar to Thrombospondin-3 precursor isoform 2                                                                                                                        |
| XP_864877.1 | PREDICTED: similar to D-site-binding protein (Albumin D box-binding protein) (TAXREB302) isoform 4                                                                                |
| XP_864879.1 | PREDICTED: similar to G1/S-specific cyclin D3 isoform 3                                                                                                                           |
| XP_864888.1 | PREDICTED: similar to Tropomyosin 1 alpha chain (Alpha-tropomyosin) isoform 5                                                                                                     |
| XP_864891.1 | PREDICTED: similar to ring finger and WD repeat domain 1 isoform 1 isoform 4                                                                                                      |
| XP_864905.1 | PREDICTED: similar to dynamin 1-like isoform b isoform 4                                                                                                                          |
| XP_864916.1 | PREDICTED: similar to D-site-binding protein (Albumin D box-binding protein) (TAXREB302) isoform 5                                                                                |
| XP_864921.1 | PREDICTED: similar to Protein tyrosine phosphatase type IVA protein 2 (Protein-tyrosine phosphatase 4a2) (Protein-tyrosine phosphatase of regenerating liver-2) (PRL-2) isoform 3 |
| XP_864963.1 | PREDICTED: similar to tropomyosin 1 alpha chain isoform 6 isoform 9                                                                                                               |
| XP_864965.1 | PREDICTED: similar to WD repeat domain 78 isoform 1 isoform 3                                                                                                                     |
| XP_864976.1 | PREDICTED: similar to Protein tyrosine phosphatase type IVA protein 2 (Protein-tyrosine phosphatase 4a2) (Protein-tyrosine phosphatase of regenerating liver-2) (PRL-2) isoform 5 |
| XP_864981.1 | PREDICTED: similar to tropomyosin 1 alpha chain isoform 4 isoform 10                                                                                                              |
| XP_864992.1 | PREDICTED: similar to Brain-specific angiogenesis inhibitor 2 precursor isoform 3                                                                                                 |
| XP_864996.1 | PREDICTED: similar to RNA-binding region containing protein 2 (Hepatocellular carcinoma protein 1) (Splicing factor HCC1) isoform 5                                               |
| XP_864999.1 | PREDICTED: similar to tropomyosin 1, alpha isoform 11                                                                                                                             |
| XP_865022.1 | PREDICTED: similar to dishevelled-associated activator of morphogenesis 1 isoform 4                                                                                               |
| XP_865028.1 | PREDICTED: similar to Beta-adrenergic receptor kinase 1 (Beta-ARK-1) (G-protein coupled receptor kinase 2) isoform 4                                                              |
| XP_865036.1 | PREDICTED: similar to tropomyosin 1 alpha chain isoform 2 isoform 13                                                                                                              |
| XP_865054.1 | PREDICTED: similar to LIM domain binding 3 isoform 13                                                                                                                             |
| XP_865057.1 | PREDICTED: similar to dishevelled-associated activator of morphogenesis 1 isoform 6                                                                                               |
| XP_865086.1 | PREDICTED: similar to pumilio 1 isoform 2 isoform 3                                                                                                                               |
| XP_865090.1 | PREDICTED: similar to RNA-binding region (RNP1, RRM) containing 2 (predicted) isoform 10                                                                                          |
| XP_865093.1 | PREDICTED: similar to tropomyosin 1 alpha chain isoform 4 isoform 16                                                                                                              |
| XP_865097.1 | PREDICTED: similar to chromosome 2 open reading frame 30 isoform 5                                                                                                                |
| XP_865101.1 | PREDICTED: similar to CG3295-PA isoform 3                                                                                                                                         |

|             |                                                                                                                                                                                                |
|-------------|------------------------------------------------------------------------------------------------------------------------------------------------------------------------------------------------|
| XP_865112.1 | PREDICTED: similar to nucleotide binding protein 2 (predicted) isoform 3                                                                                                                       |
| XP_865127.1 | PREDICTED: similar to Thioredoxin-dependent peroxide reductase, mitochondrial precursor (Peroxioredoxin 3) (Antioxidant protein 1) (AOP-1) (MER5 protein homolog) (HBC189) (PRX III) isoform 2 |
| XP_865128.1 | PREDICTED: similar to tropomyosin 1 alpha chain isoform 6 isoform 18                                                                                                                           |
| XP_865135.1 | PREDICTED: similar to odd Oz/ten-m homolog 1 isoform 2                                                                                                                                         |
| XP_865138.1 | PREDICTED: similar to Elongation factor 1-gamma (EF-1-gamma) (eEF-1B gamma) isoform 2                                                                                                          |
| XP_865148.1 | PREDICTED: similar to tropomyosin 1 alpha chain isoform 6 isoform 19                                                                                                                           |
| XP_865167.1 | PREDICTED: similar to RNA-binding region containing protein 2 isoform b isoform 14                                                                                                             |
| XP_865171.1 | PREDICTED: similar to Tropomyosin 1 alpha chain (Alpha-tropomyosin) isoform 20                                                                                                                 |
| XP_865191.1 | PREDICTED: hypothetical protein XP_860098                                                                                                                                                      |
| XP_865195.1 | PREDICTED: similar to Elongation factor 1-gamma (EF-1-gamma) (eEF-1B gamma) isoform 5                                                                                                          |
| XP_865205.1 | PREDICTED: similar to tropomyosin 1 alpha chain isoform 7 isoform 21                                                                                                                           |
| XP_865213.1 | PREDICTED: hypothetical protein XP_860120, partial                                                                                                                                             |
| XP_865219.1 | PREDICTED: similar to armadillo repeat containing 8 isoform 14                                                                                                                                 |
| XP_865223.1 | PREDICTED: similar to Tropomyosin 1 alpha chain (Alpha-tropomyosin) isoform 22                                                                                                                 |
| XP_865236.1 | PREDICTED: similar to solute carrier family 6, member 15 isoform 5                                                                                                                             |
| XP_865244.1 | PREDICTED: similar to Tropomyosin 1 alpha chain (Alpha-tropomyosin) isoform 23                                                                                                                 |
| XP_865250.1 | PREDICTED: similar to Elongation factor 1-gamma (EF-1-gamma) (eEF-1B gamma) isoform 7                                                                                                          |
| XP_865253.1 | PREDICTED: similar to epsilon subunit of coatamer protein complex isoform a isoform 3                                                                                                          |
| XP_865265.1 | PREDICTED: similar to testis intracellular mediator protein isoform 6                                                                                                                          |
| XP_865266.1 | PREDICTED: similar to Elongation factor 1-gamma (EF-1-gamma) (eEF-1B gamma) isoform 8                                                                                                          |
| XP_865267.1 | PREDICTED: similar to zinc finger CCCH type containing 11A isoform 2                                                                                                                           |
| XP_865270.1 | PREDICTED: similar to forkhead-associated (FHA) phosphopeptide binding domain 1 isoform 2                                                                                                      |
| XP_865278.1 | PREDICTED: similar to SWI/SNF-related matrix-associated actin-dependent regulator of chromatin a1 isoform a isoform 2                                                                          |
| XP_865280.1 | PREDICTED: hypothetical protein XP_860187                                                                                                                                                      |
| XP_865283.1 | PREDICTED: similar to Elongation factor 1-gamma (EF-1-gamma) (eEF-1B gamma) isoform 9                                                                                                          |
| XP_865297.1 | PREDICTED: similar to Striatin-4 (Zinedin) isoform 2                                                                                                                                           |
| XP_865302.1 | PREDICTED: similar to Spectrin beta chain, brain 2 (Spectrin, non-erythroid beta chain 2) (Beta-III spectrin) isoform 3                                                                        |
| XP_865321.1 | PREDICTED: similar to Cartilage oligomeric matrix protein precursor (COMP) isoform 2                                                                                                           |
| XP_865342.1 | PREDICTED: similar to Phosphoglucomutase 1 (Glucose phosphomutase 1) (PGM 1) isoform 4                                                                                                         |
| XP_865348.1 | PREDICTED: similar to protein kinase D2 isoform 3                                                                                                                                              |
| XP_865352.1 | PREDICTED: similar to Transmembrane GTPase MFN2 (Mitofusin-2) isoform 9                                                                                                                        |
| XP_865359.1 | PREDICTED: similar to phosphoglucomutase 1 isoform 5                                                                                                                                           |
| XP_865372.1 | PREDICTED: similar to Protein C22orf19 (NF2/meningioma region protein pK1.3) (Placental protein 39.2) isoform 3                                                                                |
| XP_865394.1 | PREDICTED: similar to protein kinase D2 isoform 5                                                                                                                                              |
| XP_865449.1 | PREDICTED: similar to Serum response factor (SRF) isoform 3                                                                                                                                    |

|             |                                                                                                                                                                                        |
|-------------|----------------------------------------------------------------------------------------------------------------------------------------------------------------------------------------|
| XP_865453.1 | PREDICTED: similar to tumor susceptibility gene 101 isoform 5                                                                                                                          |
| XP_865455.1 | PREDICTED: similar to disks large-associated protein 4 isoform b isoform 2                                                                                                             |
| XP_865474.1 | PREDICTED: similar to Disks large-associated protein 4 (DAP-4) (SAP90/PSD-95-associated protein 4) (SAPAP4) (PSD-95/SAP90 binding protein 4) isoform 3                                 |
| XP_865488.1 | PREDICTED: similar to neurofibromin 2 isoform 7 isoform 8                                                                                                                              |
| XP_865496.1 | PREDICTED: hypothetical protein XP_860403                                                                                                                                              |
| XP_865508.1 | PREDICTED: similar to neurofibromin 2 isoform 2 isoform 9                                                                                                                              |
| XP_865516.1 | PREDICTED: similar to calmodulin 1 isoform 3                                                                                                                                           |
| XP_865526.1 | PREDICTED: similar to Cysteine and glycine-rich protein 3 (Cysteine-rich protein 3) (CRP3) (LIM domain protein, cardiac) (Muscle LIM protein) isoform 4                                |
| XP_865539.1 | PREDICTED: similar to methionine adenosyltransferase II, alpha isoform 4                                                                                                               |
| XP_865552.1 | PREDICTED: hypothetical protein XP_860459                                                                                                                                              |
| XP_865579.1 | PREDICTED: similar to neurofibromin 2 isoform 1 isoform 13                                                                                                                             |
| XP_865583.1 | PREDICTED: similar to Tropomyosin alpha 3 chain (Tropomyosin 3) (Tropomyosin gamma) (hTM5) isoform 4                                                                                   |
| XP_865587.1 | PREDICTED: hypothetical protein XP_860494                                                                                                                                              |
| XP_865592.1 | PREDICTED: similar to methionine adenosyltransferase II, alpha isoform 7                                                                                                               |
| XP_865593.1 | PREDICTED: similar to skeletal muscle specific actinin, alpha 3 isoform 7                                                                                                              |
| XP_865597.1 | PREDICTED: similar to tropomyosin 3 isoform 2 isoform 5                                                                                                                                |
| XP_865609.1 | PREDICTED: similar to tropomyosin 3 isoform 1 isoform 6                                                                                                                                |
| XP_865613.1 | PREDICTED: similar to ubiquitin associated protein 2 isoform 1 isoform 4                                                                                                               |
| XP_865622.1 | PREDICTED: similar to tropomyosin 3 isoform 2 isoform 7                                                                                                                                |
| XP_865625.1 | PREDICTED: similar to Echinoderm microtubule-associated protein-like 2 (EMAP-2) (HuEMAP-2) isoform 6                                                                                   |
| XP_865627.1 | PREDICTED: hypothetical protein XP_860534 isoform 3                                                                                                                                    |
| XP_865636.1 | PREDICTED: similar to Tropomyosin alpha 3 chain (Tropomyosin 3) (Tropomyosin gamma) (hTM5) isoform 8                                                                                   |
| XP_865644.1 | PREDICTED: similar to potassium channel modulatory factor 1 isoform 2                                                                                                                  |
| XP_865647.1 | PREDICTED: similar to GTP binding protein 3 (mitochondrial) isoform V isoform 2                                                                                                        |
| XP_865651.1 | PREDICTED: similar to Transcription factor AP-1 (Activator protein 1) (AP1) (Proto-oncogene c-jun) (V-jun avian sarcoma virus 17 oncogene homolog) (Jun A) (AH119) isoform 2           |
| XP_865657.1 | PREDICTED: hypothetical protein XP_860564                                                                                                                                              |
| XP_865666.1 | PREDICTED: similar to Inositol 1,4,5-trisphosphate receptor type 2 (Type 2 inositol 1,4,5-trisphosphate receptor) (Type 2 InsP3 receptor) (IP3 receptor isoform 2) (InsP3R2) isoform 5 |
| XP_865676.1 | PREDICTED: similar to nuclear receptor subfamily 2, group F, member 6 isoform 2                                                                                                        |
| XP_865685.1 | PREDICTED: similar to tropomyosin isoform 6 isoform 11                                                                                                                                 |
| XP_865697.1 | PREDICTED: similar to Inositol 1,4,5-trisphosphate receptor type 2 (Type 2 inositol 1,4,5-trisphosphate receptor) (Type 2 InsP3 receptor) (IP3 receptor isoform 2) (InsP3R2) isoform 7 |
| XP_865701.1 | PREDICTED: similar to Tropomyosin alpha 3 chain (Tropomyosin 3) (Tropomyosin gamma) (hTM5) isoform 12                                                                                  |
| XP_865709.1 | PREDICTED: similar to eukaryotic translation elongation factor 1 alpha 1 isoform 3                                                                                                     |
| XP_865714.1 | PREDICTED: similar to Transcription factor AP-1 (Activator protein 1) (AP1) (Proto-oncogene c-jun) (V-jun avian sarcoma virus 17 oncogene homolog) (Jun A) (AH119) isoform 6           |

|             |                                                                                                                                                                                                       |
|-------------|-------------------------------------------------------------------------------------------------------------------------------------------------------------------------------------------------------|
| XP_865734.1 | PREDICTED: hypothetical protein XP_860641                                                                                                                                                             |
| XP_865763.1 | PREDICTED: similar to Nesprin-2 (Nuclear envelope spectrin repeat protein 2) (Syne-2) (Synaptic nuclear envelope protein 2) (Nucleus and actin connecting element protein) (NUANCE protein) isoform 2 |
| XP_865765.1 | PREDICTED: similar to Programmed cell death protein 8, mitochondrial precursor (Apoptosis-inducing factor) isoform 3                                                                                  |
| XP_865780.1 | PREDICTED: similar to tropomyosin 3 isoform 2 isoform 16                                                                                                                                              |
| XP_865805.1 | PREDICTED: similar to tropomyosin 3 isoform 2 isoform 17                                                                                                                                              |
| XP_865808.1 | PREDICTED: similar to programmed cell death 8 isoform 2 isoform 6                                                                                                                                     |
| XP_865814.1 | PREDICTED: similar to adaptor-related protein complex 1, mu 1 subunit isoform 2                                                                                                                       |
| XP_865816.1 | PREDICTED: similar to Proto-oncogene tyrosine-protein kinase Src (p60-Src) (c-Src) isoform 2                                                                                                          |
| XP_865820.1 | PREDICTED: similar to tropomyosin 3 isoform 2 isoform 18                                                                                                                                              |
| XP_865829.1 | PREDICTED: similar to CG8372-PA, isoform A isoform 3                                                                                                                                                  |
| XP_865836.1 | PREDICTED: similar to tropomyosin 3, gamma isoform 19                                                                                                                                                 |
| XP_865841.1 | PREDICTED: similar to adaptor-related protein complex 1, mu 1 subunit isoform 4                                                                                                                       |
| XP_865842.1 | PREDICTED: similar to Proto-oncogene tyrosine-protein kinase Src (p60-Src) (c-Src) isoform 4                                                                                                          |
| XP_865847.1 | PREDICTED: similar to tropomyosin 3, gamma isoform 20                                                                                                                                                 |
| XP_865860.1 | PREDICTED: similar to tropomyosin 3, gamma isoform 21                                                                                                                                                 |
| XP_865864.1 | PREDICTED: hypothetical protein XP_860771                                                                                                                                                             |
| XP_865892.1 | PREDICTED: similar to Putative RNA-binding protein 15 (RNA binding motif protein 15) (One-twenty two protein) isoform 2                                                                               |
| XP_865893.1 | PREDICTED: similar to tropomyosin 3 isoform 2 isoform 23                                                                                                                                              |
| XP_865899.1 | PREDICTED: similar to Yip1 interacting factor homolog isoform 4                                                                                                                                       |
| XP_865903.1 | PREDICTED: similar to pleckstrin homology domain containing, family A (phosphoinositide binding specific) member 1 isoform 7                                                                          |
| XP_865924.1 | PREDICTED: similar to galactose-1-phosphate uridylyltransferase isoform 1 isoform 3                                                                                                                   |
| XP_865928.1 | PREDICTED: similar to adaptor-related protein complex 1, mu 1 subunit isoform 10                                                                                                                      |
| XP_865939.1 | PREDICTED: similar to cytosolic ovarian carcinoma antigen 1 isoform b isoform 6                                                                                                                       |
| XP_865988.1 | PREDICTED: similar to Heat shock protein HSP 90-beta (HSP 84) (Tumor specific transplantation 84 kDa antigen) (TSTA) isoform 2                                                                        |
| XP_865998.1 | PREDICTED: hypothetical protein XP_860905                                                                                                                                                             |
| XP_866006.1 | PREDICTED: similar to smoothelin isoform b isoform 6                                                                                                                                                  |
| XP_866023.1 | PREDICTED: similar to interleukin enhancer binding factor 2 isoform 2                                                                                                                                 |
| XP_866028.1 | PREDICTED: similar to Apolipoprotein E precursor (Apo-E) isoform 3                                                                                                                                    |
| XP_866031.1 | PREDICTED: similar to heat shock protein 1, beta isoform 5                                                                                                                                            |
| XP_866044.1 | PREDICTED: hypothetical protein XP_860951 isoform 2                                                                                                                                                   |
| XP_866073.1 | PREDICTED: similar to translocase of outer mitochondrial membrane 40 homolog isoform 2                                                                                                                |
| XP_866077.1 | PREDICTED: similar to Splicing factor 3B subunit 2 (Spliceosome associated protein 145) (SAP 145) (SF3b150) (Pre-mRNA splicing factor SF3b 145 kDa subunit) isoform 7                                 |
| XP_866080.1 | PREDICTED: similar to CG6454-PA, isoform A isoform 4                                                                                                                                                  |
| XP_866091.1 | PREDICTED: similar to Transitional endoplasmic reticulum ATPase (TER ATPase) (15S Mg(2+)-ATPase p97 subunit) (Valosin-containing protein) (VCP) isoform 6                                             |
| XP_866095.1 | PREDICTED: similar to tropomyosin 1 (alpha) isoform 3                                                                                                                                                 |

|             |                                                                                                                                                            |
|-------------|------------------------------------------------------------------------------------------------------------------------------------------------------------|
| XP_866097.1 | PREDICTED: similar to sterol carrier protein 2 isoform 1 proprotein isoform 4                                                                              |
| XP_866101.1 | PREDICTED: hypothetical protein XP_861008                                                                                                                  |
| XP_866102.1 | PREDICTED: hypothetical protein XP_861009, partial                                                                                                         |
| XP_866106.1 | PREDICTED: similar to Methionine aminopeptidase 2 (MetAP 2) (Peptidase M 2) (Initiation factor 2 associated 67 kDa glycoprotein) (p67) (p67eIF2) isoform 5 |
| XP_866109.1 | PREDICTED: similar to tropomyosin 1, alpha isoform 4                                                                                                       |
| XP_866112.1 | PREDICTED: similar to CG6454-PB, isoform B isoform 5                                                                                                       |
| XP_866118.1 | PREDICTED: similar to sperm associated antigen 9 isoform 1 isoform 12                                                                                      |
| XP_866121.1 | PREDICTED: similar to Transitional endoplasmic reticulum ATPase (TER ATPase) (15S Mg(2+)-ATPase p97 subunit) (Valosin-containing protein) (VCP) isoform 8  |
| XP_866127.1 | PREDICTED: similar to tropomyosin 4 isoform 1 isoform 5                                                                                                    |
| XP_866139.1 | PREDICTED: similar to Methionine aminopeptidase 2 (MetAP 2) (Peptidase M 2) (Initiation factor 2 associated 67 kDa glycoprotein) (p67) (p67eIF2) isoform 7 |
| XP_866154.1 | PREDICTED: similar to Methionine aminopeptidase 2 (MetAP 2) (Peptidase M 2) (Initiation factor 2 associated 67 kDa glycoprotein) (p67) (p67eIF2) isoform 8 |
| XP_866176.1 | PREDICTED: similar to ankyrin repeat, SAM and basic leucine zipper domain containing 1 isoform 2                                                           |
| XP_866184.1 | PREDICTED: similar to Receptor-type tyrosine-protein phosphatase epsilon precursor (Protein-tyrosine phosphatase epsilon) (R-PTP-epsilon) isoform 2        |
| XP_866190.1 | PREDICTED: similar to actin-related protein 2 isoform 4                                                                                                    |
| XP_866191.1 | PREDICTED: similar to Transitional endoplasmic reticulum ATPase (TER ATPase) (15S Mg(2+)-ATPase p97 subunit) (Valosin-containing protein) (VCP) isoform 12 |
| XP_866196.1 | PREDICTED: similar to hepatocyte nuclear factor 4 alpha isoform 3                                                                                          |
| XP_866248.1 | PREDICTED: similar to ELK3 protein isoform 2                                                                                                               |
| XP_866251.1 | PREDICTED: similar to bromodomain-containing protein 4 isoform short isoform 9                                                                             |
| XP_866253.1 | PREDICTED: similar to Adenosine deaminase (Adenosine aminohydrolase) isoform 2                                                                             |
| XP_866276.1 | PREDICTED: hypothetical protein XP_861183                                                                                                                  |
| XP_866296.1 | PREDICTED: similar to dynactin 1 isoform 1 isoform 10                                                                                                      |
| XP_866299.1 | PREDICTED: similar to bromodomain-containing protein 4 isoform short isoform 11                                                                            |
| XP_866300.1 | PREDICTED: similar to Muscleblind-like protein (Triplet-expansion RNA-binding protein) isoform 10                                                          |
| XP_866316.1 | PREDICTED: similar to serine/arginine repetitive matrix 1 isoform 6                                                                                        |
| XP_866322.1 | PREDICTED: similar to cytoplasmic polyadenylation element binding protein 4 isoform 6                                                                      |
| XP_866328.1 | PREDICTED: similar to dynactin 1 isoform 1 isoform 12                                                                                                      |
| XP_866338.1 | PREDICTED: similar to 60S acidic ribosomal protein P0 (L10E) isoform 2                                                                                     |
| XP_866359.1 | PREDICTED: similar to Mid-1-related chloride channel 1 isoform 2                                                                                           |
| XP_866369.1 | PREDICTED: similar to bromodomain-containing protein 4 isoform short isoform 16                                                                            |
| XP_866390.1 | PREDICTED: hypothetical protein XP_861297                                                                                                                  |
| XP_866391.1 | PREDICTED: hypothetical protein XP_861298                                                                                                                  |
| XP_866392.1 | PREDICTED: similar to branched chain keto acid dehydrogenase E1, alpha polypeptide isoform 2                                                               |
| XP_866393.1 | PREDICTED: similar to solute carrier family 25 member 3 isoform b precursor isoform 4                                                                      |
| XP_866402.1 | PREDICTED: similar to solute carrier family 25 member 3 isoform a precursor isoform 5                                                                      |
| XP_866412.1 | PREDICTED: hypothetical protein XP_861319                                                                                                                  |
| XP_866436.1 | PREDICTED: similar to Tropomyosin beta chain (Tropomyosin 2) (Beta-tropomyosin) isoform 5                                                                  |

|             |                                                                                                                                                                                                             |
|-------------|-------------------------------------------------------------------------------------------------------------------------------------------------------------------------------------------------------------|
| XP_866437.1 | PREDICTED: similar to Glutamate--cysteine ligase catalytic subunit (Gamma-glutamylcysteine synthetase) (Gamma-ECS) (GCS heavy chain) isoform 3                                                              |
| XP_866449.1 | PREDICTED: hypothetical protein XP_861356                                                                                                                                                                   |
| XP_866450.1 | PREDICTED: similar to Tropomyosin beta chain (Tropomyosin 2) (Beta-tropomyosin) isoform 6                                                                                                                   |
| XP_866453.1 | PREDICTED: similar to Mob4B protein isoform 3                                                                                                                                                               |
| XP_866455.1 | PREDICTED: similar to G-protein signalling modulator 2 (AGS3-like, C. elegans) isoform 7                                                                                                                    |
| XP_866462.1 | PREDICTED: similar to Tropomyosin beta chain (Tropomyosin 2) (Beta-tropomyosin) isoform 7                                                                                                                   |
| XP_866465.1 | PREDICTED: similar to pecanex-like 3 isoform 3                                                                                                                                                              |
| XP_866508.1 | PREDICTED: similar to Syntaxin-binding protein 3 (UNC-18 homolog 3) (UNC-18C) (UNC-18-3) (Platelet Sec1 protein) (PSP) isoform 3                                                                            |
| XP_866513.1 | PREDICTED: similar to Tropomyosin beta chain (Tropomyosin 2) (Beta-tropomyosin) isoform 11                                                                                                                  |
| XP_866515.1 | PREDICTED: similar to T-complex protein 1, eta subunit (TCP-1-eta) (CCT-eta) (HIV-1 Nef interacting protein) isoform 3                                                                                      |
| XP_866529.1 | PREDICTED: similar to tropomyosin 2 (beta) isoform 2 isoform 12                                                                                                                                             |
| XP_866539.1 | PREDICTED: similar to Syntaxin-binding protein 3 (UNC-18 homolog 3) (UNC-18C) (UNC-18-3) (Platelet Sec1 protein) (PSP) isoform 5                                                                            |
| XP_866541.1 | PREDICTED: similar to SRY (sex determining region Y)-box 3 isoform 4                                                                                                                                        |
| XP_866544.1 | PREDICTED: similar to Tropomyosin beta chain (Tropomyosin 2) (Beta-tropomyosin) isoform 13                                                                                                                  |
| XP_866557.1 | PREDICTED: similar to tropomyosin 2 (beta) isoform 2 isoform 14                                                                                                                                             |
| XP_866572.1 | PREDICTED: similar to tropomyosin 2 (beta) isoform 2 isoform 15                                                                                                                                             |
| XP_866596.1 | PREDICTED: similar to tropomyosin 2 (beta) isoform 2 isoform 16                                                                                                                                             |
| XP_866608.1 | PREDICTED: similar to T-complex protein 1, eta subunit (TCP-1-eta) (CCT-eta) (HIV-1 Nef interacting protein) isoform 10                                                                                     |
| XP_866613.1 | PREDICTED: similar to serine/threonine kinase receptor associated protein (predicted) isoform 2                                                                                                             |
| XP_866618.1 | PREDICTED: similar to fragile X mental retardation 1 isoform 3                                                                                                                                              |
| XP_866632.1 | PREDICTED: similar to Talin-1 isoform 3                                                                                                                                                                     |
| XP_866665.1 | PREDICTED: similar to Bullous pemphigoid antigen 1, isoforms 6/9/10 (Trabeculin-beta) (Bullous pemphigoid antigen) (BPA) (Hemidesmosomal plaque protein) (Dystonia musculorum protein) (Dystonin) isoform 6 |
| XP_866677.1 | PREDICTED: similar to Talin-1 isoform 7                                                                                                                                                                     |
| XP_866705.1 | PREDICTED: similar to talin 1 isoform 9                                                                                                                                                                     |
| XP_866724.1 | PREDICTED: similar to eukaryotic translation elongation factor 1 alpha 2 isoform 4                                                                                                                          |
| XP_866738.1 | PREDICTED: similar to Engulfment and cell motility protein 2 (CED-12 homolog A) isoform 4                                                                                                                   |
| XP_866763.1 | PREDICTED: similar to myosin binding protein C, slow type isoform 1 isoform 9                                                                                                                               |
| XP_866770.1 | PREDICTED: similar to splicing factor, arginine/serine-rich 1 (ASF/SF2) isoform 5                                                                                                                           |
| XP_866796.1 | PREDICTED: similar to nucleolar protein 4 isoform 2                                                                                                                                                         |
| XP_866798.1 | PREDICTED: similar to splicing factor, arginine/serine-rich 1 (ASF/SF2) isoform 7                                                                                                                           |
| XP_866799.1 | PREDICTED: similar to fragile X mental retardation 1 isoform 16                                                                                                                                             |
| XP_866833.1 | PREDICTED: similar to nucleolar protein 4 isoform 5                                                                                                                                                         |
| XP_866843.1 | PREDICTED: similar to dynein light chain-2 isoform 2                                                                                                                                                        |
| XP_866857.1 | PREDICTED: similar to SH3KBP1 binding protein 1 isoform 2                                                                                                                                                   |
| XP_866876.1 | PREDICTED: hypothetical protein XP_861783                                                                                                                                                                   |

|             |                                                                                                                                                                                                                                                                                                                                 |
|-------------|---------------------------------------------------------------------------------------------------------------------------------------------------------------------------------------------------------------------------------------------------------------------------------------------------------------------------------|
| XP_866899.1 | PREDICTED: similar to Splicing factor 1 (Zinc finger protein 162) (Transcription factor ZFM1) (Zinc finger gene in MEN1 locus) (Mammalian branch point binding protein mBBP) (BBP) isoform 8                                                                                                                                    |
| XP_866952.1 | PREDICTED: similar to Metal-response element-binding transcription factor 2 (Metal-response element DNA-binding protein M96) isoform 4                                                                                                                                                                                          |
| XP_866962.1 | PREDICTED: similar to actinin, alpha 1 isoform 9                                                                                                                                                                                                                                                                                |
| XP_866965.1 | PREDICTED: similar to protein tyrosine phosphatase 4a1 isoform 2                                                                                                                                                                                                                                                                |
| XP_866980.1 | PREDICTED: similar to ADP-dependent glucokinase (ADPGK) (ADP-GK) (RbBP-35) isoform 3                                                                                                                                                                                                                                            |
| XP_866988.1 | PREDICTED: similar to Glycogen phosphorylase, muscle form (Myophosphorylase) isoform 6                                                                                                                                                                                                                                          |
| XP_866992.1 | PREDICTED: similar to Metal-response element-binding transcription factor 2 (Metal-response element DNA-binding protein M96) isoform 8                                                                                                                                                                                          |
| XP_867005.1 | PREDICTED: hypothetical protein XP_861912                                                                                                                                                                                                                                                                                       |
| XP_867011.1 | PREDICTED: hypothetical protein XP_861918                                                                                                                                                                                                                                                                                       |
| XP_867012.1 | PREDICTED: similar to tudor domain containing 7 isoform 2                                                                                                                                                                                                                                                                       |
| XP_867108.1 | PREDICTED: hypothetical protein XP_862015                                                                                                                                                                                                                                                                                       |
| XP_867112.1 | PREDICTED: similar to c-src tyrosine kinase isoform 6                                                                                                                                                                                                                                                                           |
| XP_867121.1 | PREDICTED: similar to Zinc finger SWIM domain containing protein 4 isoform 2                                                                                                                                                                                                                                                    |
| XP_867125.1 | PREDICTED: similar to zinc finger protein 644 isoform 1 isoform 7                                                                                                                                                                                                                                                               |
| XP_867134.1 | PREDICTED: similar to Secretory carrier-associated membrane protein 2 isoform 2                                                                                                                                                                                                                                                 |
| XP_867136.1 | PREDICTED: similar to suppressor of Ty 5 homolog isoform 4<br>PREDICTED: similar to SWI/SNF related matrix associated actin dependent regulator of chromatin subfamily A member 5 (SWI/SNF-related matrix-associated actin-dependent regulator of chromatin A5) (Sucrose nonfermenting protein 2 homolog) (hSNF2H)... isoform 5 |
| XP_867147.1 |                                                                                                                                                                                                                                                                                                                                 |
| XP_867162.1 | PREDICTED: hypothetical protein XP_862069                                                                                                                                                                                                                                                                                       |
| XP_867163.1 | PREDICTED: similar to CG32333-PA, isoform A isoform 7                                                                                                                                                                                                                                                                           |
| XP_867169.1 | PREDICTED: hypothetical protein XP_862076                                                                                                                                                                                                                                                                                       |
| XP_867170.1 | PREDICTED: similar to N-acetylneuraminic acid phosphate synthase isoform 3                                                                                                                                                                                                                                                      |
| XP_867177.1 | PREDICTED: similar to Clathrin heavy chain isoform 2                                                                                                                                                                                                                                                                            |
| XP_867227.1 | PREDICTED: similar to Clathrin heavy chain 1 (CLH-17) isoform 7                                                                                                                                                                                                                                                                 |
| XP_867266.1 | PREDICTED: similar to SRY (sex determining region Y)-box 30 isoform b isoform 3                                                                                                                                                                                                                                                 |
| XP_867270.1 | PREDICTED: hypothetical protein XP_862177                                                                                                                                                                                                                                                                                       |
| XP_867282.1 | PREDICTED: similar to heterogeneous nuclear ribonucleoprotein L isoform a isoform 5                                                                                                                                                                                                                                             |
| XP_867294.1 | PREDICTED: similar to zinc finger protein 64 isoform b isoform 4                                                                                                                                                                                                                                                                |
| XP_867307.1 | PREDICTED: similar to Isocitrate dehydrogenase [NAD] subunit gamma, mitochondrial precursor (Isocitric dehydrogenase) (NAD(+)-specific ICDH) isoform 3                                                                                                                                                                          |
| XP_867312.1 | PREDICTED: similar to Gamma enolase (2-phospho-D-glycerate hydro-lyase) (Neural enolase) (Neuron-specific enolase) (NSE) (Enolase 2) isoform 4                                                                                                                                                                                  |
| XP_867320.1 | PREDICTED: similar to calreticulin isoform 5<br>PREDICTED: similar to SPARC related modular calcium-binding protein 1 precursor (Secreted modular calcium-binding protein 1) (SMOC-1) (SPARC-related gene protein) isoform 2                                                                                                    |
| XP_867323.1 |                                                                                                                                                                                                                                                                                                                                 |
| XP_867356.1 | PREDICTED: similar to Potassium voltage-gated channel subfamily KQT member 5 (Voltage-gated potassium channel subunit Kv7.5) (Potassium channel alpha subunit KvLQT5) (KQT-like 5) isoform 2                                                                                                                                    |
| XP_867367.1 | PREDICTED: hypothetical protein XP_862274                                                                                                                                                                                                                                                                                       |



|             |                                                                                                                                                                                                                         |
|-------------|-------------------------------------------------------------------------------------------------------------------------------------------------------------------------------------------------------------------------|
| XP_867386.1 | PREDICTED: similar to PDZ domain containing 4 isoform 2                                                                                                                                                                 |
| XP_867405.1 | PREDICTED: similar to solute carrier family 8 member 3 isoform C precursor isoform 8                                                                                                                                    |
| XP_867408.1 | PREDICTED: hypothetical protein XP_862315                                                                                                                                                                               |
| XP_867444.1 | PREDICTED: similar to actinin, alpha 4 isoform 14                                                                                                                                                                       |
| XP_867448.1 | PREDICTED: similar to arsA arsenite transporter, ATP-binding, homolog 1 isoform 3                                                                                                                                       |
| XP_867450.1 | PREDICTED: similar to zinc finger protein 300 isoform 2                                                                                                                                                                 |
| XP_867457.1 | PREDICTED: similar to arsA arsenite transporter, ATP-binding, homolog 1 isoform 4                                                                                                                                       |
| XP_867459.1 | PREDICTED: similar to cAMP-dependent protein kinase catalytic subunit beta isoform 1 isoform 2                                                                                                                          |
| XP_867471.1 | PREDICTED: similar to Methyl-CpG-binding protein 2 (MeCP-2 protein) (MeCP2) isoform 2                                                                                                                                   |
| XP_867472.1 | PREDICTED: hypothetical protein XP_862379                                                                                                                                                                               |
| XP_867478.1 | PREDICTED: similar to G protein-coupled receptor 162 isoform 2 isoform 5                                                                                                                                                |
| XP_867483.1 | PREDICTED: similar to Filamin A (Alpha-filamin) (Filamin 1) (Endothelial actin-binding protein) (Actin-binding protein 280) (ABP-280) (Nonmuscle filamin) isoform 2                                                     |
| XP_867491.1 | PREDICTED: hypothetical protein XP_862398                                                                                                                                                                               |
|             | PREDICTED: similar to Mitogen-activated protein kinase kinase kinase kinase 1 (MAPK/ERK kinase kinase kinase 1) (MEK kinase kinase 1) (MEKKK 1) (Hematopoietic progenitor kinase) isoform 2                             |
| XP_867492.1 |                                                                                                                                                                                                                         |
| XP_867503.1 | PREDICTED: similar to filamin A interacting protein 1 isoform 3                                                                                                                                                         |
| XP_867513.1 | PREDICTED: similar to filamin A interacting protein 1 isoform 4                                                                                                                                                         |
| XP_867521.1 | PREDICTED: hypothetical protein XP_862428                                                                                                                                                                               |
| XP_867524.1 | PREDICTED: similar to cAMP-dependent protein kinase, beta-catalytic subunit (PKA C-beta) isoform 9                                                                                                                      |
| XP_867566.1 | PREDICTED: similar to acetyl-Coenzyme A carboxylase alpha isoform 1 isoform 8                                                                                                                                           |
| XP_867577.1 | PREDICTED: hypothetical protein XP_862484                                                                                                                                                                               |
| XP_867627.1 | PREDICTED: similar to Elongation factor 1-gamma (EF-1-gamma) (eEF-1B gamma) isoform 6                                                                                                                                   |
| XP_867662.1 | PREDICTED: similar to TAF15 RNA polymerase II, TATA box binding protein (TBP)-associated factor isoform 3                                                                                                               |
| XP_867677.1 | PREDICTED: similar to DnaJ (Hsp40) homolog, subfamily B, member 4 isoform 3                                                                                                                                             |
| XP_867687.1 | PREDICTED: similar to Far upstream element binding protein 1 (FUSE binding protein 1) (FBP) (DNA helicase V) (HDH V) isoform 3                                                                                          |
| XP_867688.1 | PREDICTED: similar to TAF15 RNA polymerase II, TATA box binding protein (TBP)-associated factor isoform 6                                                                                                               |
| XP_867720.1 | PREDICTED: similar to F-box protein FBW7 isoform 2 isoform 5                                                                                                                                                            |
| XP_867760.1 | PREDICTED: similar to Elongation factor 1-gamma (EF-1-gamma) (eEF-1B gamma) isoform 20                                                                                                                                  |
|             | PREDICTED: similar to Adapter-related protein complex 2 beta 1 subunit (Beta-adaptin) (Plasma membrane adaptor HA2/AP2 adaptin beta subunit) (Clathrin assembly protein complex 2 beta large chain) (AP105B) isoform 12 |
| XP_867773.1 |                                                                                                                                                                                                                         |
| XP_867781.1 | PREDICTED: hypothetical protein XP_862688                                                                                                                                                                               |
| XP_867792.1 | PREDICTED: similar to Elongation factor 1-gamma (EF-1-gamma) (eEF-1B gamma) isoform 24                                                                                                                                  |
| XP_867796.1 | PREDICTED: similar to Far upstream element binding protein 1 (FUSE binding protein 1) (FBP) (DNA helicase V) (HDH V) isoform 14                                                                                         |
| XP_867800.1 | PREDICTED: similar to SWI/SNF-related matrix-associated actin-dependent regulator of chromatin a4 isoform 16                                                                                                            |
| XP_867825.1 | PREDICTED: similar to chromodomain helicase DNA binding protein 4 isoform 12                                                                                                                                            |
| XP_867835.1 | PREDICTED: similar to RAB14, member RAS oncogene family isoform 2                                                                                                                                                       |

|             |                                                                                                                                                                                     |
|-------------|-------------------------------------------------------------------------------------------------------------------------------------------------------------------------------------|
| XP_867840.1 | PREDICTED: similar to Insulin gene enhancer protein ISL-1 (Islet-1) isoform 2                                                                                                       |
| XP_867844.1 | PREDICTED: similar to chromodomain helicase DNA binding protein 4 isoform 15                                                                                                        |
| XP_867845.1 | PREDICTED: similar to Insulin gene enhancer protein ISL-1 (Islet-1) isoform 3                                                                                                       |
| XP_867849.1 | PREDICTED: similar to Gelsolin precursor (Actin-depolymerizing factor) (ADF) (Brevin) (AGEL) isoform 3                                                                              |
| XP_867853.1 | PREDICTED: similar to Insulin gene enhancer protein ISL-1 (Islet-1) isoform 4                                                                                                       |
| XP_867857.1 | PREDICTED: similar to Fibrinogen gamma chain precursor isoform 3                                                                                                                    |
| XP_867892.1 | PREDICTED: similar to Gelsolin precursor (Actin-depolymerizing factor) (ADF) (Brevin) (AGEL) isoform 8                                                                              |
| XP_867894.1 | PREDICTED: similar to dynamin 2 isoform 2 isoform 2                                                                                                                                 |
| XP_867914.1 | PREDICTED: similar to dynamin 2 isoform 5                                                                                                                                           |
| XP_867922.1 | PREDICTED: similar to NAD(P) transhydrogenase, mitochondrial precursor (Pyridine nucleotide transhydrogenase) (Nicotinamide nucleotide transhydrogenase) isoform 4                  |
| XP_867926.1 | PREDICTED: similar to dynamin 2 isoform 7                                                                                                                                           |
| XP_867940.1 | PREDICTED: similar to dynamin 2 isoform 9                                                                                                                                           |
| XP_867960.1 | PREDICTED: similar to Glucose-6-phosphate isomerase (GPI) (Phosphoglucose isomerase) (PGI) (Phosphohexose isomerase) (PHI) (Neuroleukin) (NLK) (Sperm antigen-36) (SA-36) isoform 3 |
| XP_867961.1 | PREDICTED: similar to eukaryotic translation elongation factor 1 alpha 2 isoform 2                                                                                                  |
| XP_867964.1 | PREDICTED: similar to putative transcription factor ZNF131 isoform 2                                                                                                                |
| XP_867972.1 | PREDICTED: similar to BTB and CNC homology 1, basic leucine zipper transcription factor 2 isoform 2                                                                                 |
| XP_867982.1 | PREDICTED: similar to putative transcription factor ZNF131 isoform 5                                                                                                                |
| XP_867985.1 | PREDICTED: similar to putative transcription factor ZNF131 isoform 6                                                                                                                |
| XP_868006.1 | PREDICTED: hypothetical protein XP_862913                                                                                                                                           |
| XP_868033.1 | PREDICTED: similar to dynamin 2 isoform 2 isoform 28                                                                                                                                |
| XP_868052.1 | PREDICTED: similar to ephrin receptor EphA7 isoform 9                                                                                                                               |
| XP_868064.1 | PREDICTED: similar to dynamin 2 isoform 2 isoform 35                                                                                                                                |
| XP_868109.1 | PREDICTED: hypothetical protein XP_863016                                                                                                                                           |
| XP_868152.1 | PREDICTED: similar to transmembrane trafficking protein isoform 4                                                                                                                   |
| XP_868161.1 | PREDICTED: similar to ATPase, H <sup>+</sup> transporting, V1 subunit E isoform 1 isoform 3                                                                                         |
| XP_868173.1 | PREDICTED: similar to Fructose-bisphosphate aldolase C (Brain-type aldolase) isoform 3                                                                                              |
| XP_868174.1 | PREDICTED: hypothetical protein XP_863081                                                                                                                                           |
| XP_868208.1 | PREDICTED: hypothetical protein XP_863115                                                                                                                                           |
| XP_868217.1 | PREDICTED: similar to suppressor of Ty 6 homolog isoform 6                                                                                                                          |
| XP_868219.1 | PREDICTED: similar to Eukaryotic translation initiation factor 3 subunit 4 (eIF-3 delta) (eIF3 p44) (eIF-3 RNA-binding subunit) (eIF3 p42) (eIF3g) isoform 2                        |
| XP_868224.1 | PREDICTED: similar to zinc finger RNA binding protein isoform 9                                                                                                                     |
| XP_868226.1 | PREDICTED: hypothetical protein XP_863133                                                                                                                                           |
| XP_868236.1 | PREDICTED: similar to Steroid hormone receptor ERR2 (Estrogen-related receptor, beta) (ERR-beta) (Estrogen receptor-like 2) (ERR beta-2) isoform 2                                  |
| XP_868237.1 | PREDICTED: hypothetical protein XP_863144                                                                                                                                           |
| XP_868255.1 | PREDICTED: hypothetical protein XP_863162                                                                                                                                           |

|             |                                                                                                                                      |
|-------------|--------------------------------------------------------------------------------------------------------------------------------------|
| XP_868286.1 | PREDICTED: hypothetical protein XP_863193                                                                                            |
| XP_868300.1 | PREDICTED: similar to Nuclear protein SkiP (Ski-interacting protein) (SNW1 protein) (Nuclear receptor coactivator NCoA-62) isoform 3 |
| XP_868316.1 | PREDICTED: similar to Nuclear protein SkiP (Ski-interacting protein) (SNW1 protein) (Nuclear receptor coactivator NCoA-62) isoform 7 |
| XP_868325.1 | PREDICTED: similar to neurexin 3 isoform beta precursor isoform 2                                                                    |
| XP_868333.1 | PREDICTED: similar to coronin 6 isoform 2                                                                                            |
| XP_868335.1 | PREDICTED: similar to coronin, actin binding protein 6 isoform C isoform 3                                                           |
| XP_868355.1 | PREDICTED: similar to Elongation factor 1-gamma (EF-1-gamma) (eEF-1B gamma) isoform 6                                                |
| XP_868356.1 | PREDICTED: hypothetical protein XP_863263                                                                                            |
| XP_868372.1 | PREDICTED: similar to active breakpoint cluster region-related protein isoform b isoform 4                                           |
| XP_868379.1 | PREDICTED: similar to active BCR-related gene isoform 1 isoform 6                                                                    |
| XP_868387.1 | PREDICTED: similar to CG1532-PA isoform 3                                                                                            |
| XP_868388.1 | PREDICTED: hypothetical protein XP_863295                                                                                            |
| XP_868401.1 | PREDICTED: hypothetical protein XP_863308                                                                                            |
| XP_868408.1 | PREDICTED: hypothetical protein XP_863315                                                                                            |
| XP_868454.1 | PREDICTED: similar to calmodulin 1 isoform 3                                                                                         |
| XP_868485.1 | PREDICTED: similar to plasma membrane associated protein, S3-12 isoform 2                                                            |
| XP_868510.1 | PREDICTED: similar to Proto-oncogene tyrosine-protein kinase FYN (P59-FYN) (SYN) (SLK) isoform 4                                     |
| XP_868515.1 | PREDICTED: similar to protein-tyrosine kinase fyn isoform 5                                                                          |
| XP_868547.1 | PREDICTED: similar to Tryptophanyl-tRNA synthetase (Tryptophan--tRNA ligase) (TrpRS) (IFP53) (hWRS) isoform 3                        |
| XP_868553.1 | PREDICTED: similar to Guanine nucleotide-binding protein, alpha-11 subunit isoform 2                                                 |
| XP_868559.1 | PREDICTED: hypothetical protein XP_863466                                                                                            |
| XP_868580.1 | PREDICTED: hypothetical protein XP_863487                                                                                            |
| XP_868604.1 | PREDICTED: similar to Cdc42 binding protein kinase beta isoform 2                                                                    |
| XP_868617.1 | PREDICTED: similar to calponin 2 isoform b isoform 4                                                                                 |
| XP_868618.1 | PREDICTED: similar to eukaryotic translation initiation factor 5 isoform 7                                                           |
| XP_868621.1 | PREDICTED: similar to Membralin isoform 2                                                                                            |
| XP_868633.1 | PREDICTED: similar to MAP/microtubule affinity-regulating kinase 3 isoform 9                                                         |
| XP_868664.1 | PREDICTED: hypothetical protein XP_863571                                                                                            |
| XP_868680.1 | PREDICTED: hypothetical protein XP_863587                                                                                            |
| XP_868682.1 | PREDICTED: hypothetical protein XP_863589                                                                                            |
| XP_868688.1 | PREDICTED: hypothetical protein XP_863595                                                                                            |
| XP_868689.1 | PREDICTED: hypothetical protein XP_863596                                                                                            |
| XP_868692.1 | PREDICTED: hypothetical protein XP_863599                                                                                            |
| XP_868698.1 | PREDICTED: hypothetical protein XP_863605                                                                                            |
| XP_868705.1 | PREDICTED: hypothetical protein XP_863612                                                                                            |
| XP_868709.1 | PREDICTED: hypothetical protein XP_863616                                                                                            |

|             |                                           |
|-------------|-------------------------------------------|
| XP_868710.1 | PREDICTED: hypothetical protein XP_863617 |
| XP_868721.1 | PREDICTED: hypothetical protein XP_863628 |
| XP_868723.1 | PREDICTED: hypothetical protein XP_863630 |
| XP_868725.1 | PREDICTED: hypothetical protein XP_863632 |
| XP_868729.1 | PREDICTED: hypothetical protein XP_863636 |
| XP_868735.1 | PREDICTED: hypothetical protein XP_863642 |
| XP_868737.1 | PREDICTED: hypothetical protein XP_863644 |
| XP_868745.1 | PREDICTED: hypothetical protein XP_863652 |
| XP_868747.1 | PREDICTED: hypothetical protein XP_863654 |
| XP_868748.1 | PREDICTED: hypothetical protein XP_863655 |
| XP_868752.1 | PREDICTED: hypothetical protein XP_863659 |
| XP_868755.1 | PREDICTED: hypothetical protein XP_863662 |
| XP_868756.1 | PREDICTED: hypothetical protein XP_863663 |
| XP_868757.1 | PREDICTED: hypothetical protein XP_863664 |
| XP_868758.1 | PREDICTED: hypothetical protein XP_863665 |
| XP_868765.1 | PREDICTED: hypothetical protein XP_863672 |
| XP_868766.1 | PREDICTED: hypothetical protein XP_863673 |
| XP_868772.1 | PREDICTED: hypothetical protein XP_863679 |
| XP_868777.1 | PREDICTED: hypothetical protein XP_863684 |
| XP_868781.1 | PREDICTED: hypothetical protein XP_863688 |
| XP_868786.1 | PREDICTED: hypothetical protein XP_863693 |
| XP_868787.1 | PREDICTED: hypothetical protein XP_863694 |
| XP_868791.1 | PREDICTED: hypothetical protein XP_863698 |
| XP_868792.1 | PREDICTED: hypothetical protein XP_863699 |
